# Supplementary material
Source: Frontiers journal article supplement (https://www.frontiersin.org/articles/487107)
Supplement: Table_1.xlsx [file Table_1.xlsx]

## Sheet: Table S3
Table S3. Genes highly expressed in the gill of of Phreagena okutanii host. (---NA--- means no annotation)
ID	KEGG	NR annotation	GFOLD (cutoff=0.01)
TRINITY_DN66436_c7_g22_i13	---NA---	gamma-glutamyltranspeptidase 1-like	9.8456
TRINITY_DN67492_c1_g3_i9	---NA---	gamma-glutamyltranspeptidase 1-like	9.69015
TRINITY_DN66436_c7_g11_i1	K18592	gamma-glutamyltranspeptidase 1	9.67279
TRINITY_DN62488_c0_g3_i1	---NA---	countin-1	9.59785
TRINITY_DN66534_c2_g1_i2	K06580	ammonium transporter Rh type A	9.44954
TRINITY_DN65588_c0_g1_i1	---NA---	gamma-glutamyltranspeptidase 1-like	9.32415
TRINITY_DN55773_c0_g1_i2	K13858	putative sodium-driven chloride bicarbonate exchanger	9.32059
TRINITY_DN67733_c0_g1_i8	---NA---	hemoglobin III	9.29211
TRINITY_DN66127_c0_g1_i2	K20051	Low-density lipoprotein receptor-related protein 6	8.66157
TRINITY_DN57488_c0_g1_i3	K01476	arginase type I-like protein	8.58128
TRINITY_DN67860_c5_g1_i3	---NA---	hypothetical protein BRAFLDRAFT_171950	8.49556
TRINITY_DN66746_c3_g1_i2	---NA---	Pancreatic secretory granule membrane major glycoprotein GP2	8.39215
TRINITY_DN6689_c0_g1_i1	K00432	glutathione peroxidase	8.36696
TRINITY_DN59357_c0_g1_i1	K01365	cathepsin L	8.02448
TRINITY_DN65853_c0_g2_i5	K06793	macrophage mannose receptor 1-like	7.86463
TRINITY_DN66249_c0_g4_i2	---NA---	17-beta-hydroxysteroid dehydrogenase 14-like	7.78394
TRINITY_DN66667_c4_g1_i5	K01273	dipeptidase 1-like	7.73199
TRINITY_DN56876_c0_g1_i3	K14685	solute carrier family 40 member 1-like	7.65807
TRINITY_DN42286_c0_g1_i1	---NA---	DUF1566 domain-containing protein	7.57453
TRINITY_DN60321_c0_g1_i2	---NA---	uncharacterized protein LOC112571812	7.55259
TRINITY_DN47640_c1_g1_i2	---NA---	uncharacterized protein LOC111636110	7.46251
TRINITY_DN67431_c10_g4_i2	---NA---	Universal stress protein in QAH/OAS sulfhydrylase 3'region	7.41337
TRINITY_DN67169_c5_g11_i6	K20051	Low-density lipoprotein receptor-related protein 6	7.37524
TRINITY_DN60998_c1_g1_i1	K11140	aminopeptidase N-like	7.21264
TRINITY_DN35970_c0_g1_i1	K16866	metalloproteinase inhibitor 3-like	7.13181
TRINITY_DN63068_c0_g2_i3	K14386	sodium-coupled monocarboxylate transporter 1-like	6.88587
TRINITY_DN64117_c0_g1_i2	---NA---	low-density lipoprotein receptor-related protein 4-like	6.88061
TRINITY_DN68090_c3_g4_i3	K14353	solute carrier organic anion transporter family member 2A1	6.57227
TRINITY_DN63001_c0_g1_i1	---NA---	Protein yellow	6.54201
TRINITY_DN67804_c2_g4_i2	K06528	lysosome-associated membrane glycoprotein 1-like	6.46135
TRINITY_DN62018_c0_g1_i1	---NA---	Conodipine-M alpha chain	6.4411
TRINITY_DN68895_c1_g2_i1	---NA---	MAM and LDL-receptor class A domain-containing protein 2-like	6.41489
TRINITY_DN68413_c2_g8_i3	K04984	transient receptor potential cation channel subfamily A member 1	6.30109
TRINITY_DN67299_c1_g8_i1	---NA---	sodium-dependent proline transporter-like	6.29783
TRINITY_DN65221_c2_g1_i8	---NA---	haloacid dehalogenase-like hydrolase domain-containing 5	6.28779
TRINITY_DN60675_c0_g1_i1	---NA---	oxidoreductase OpS5-like	6.2665
TRINITY_DN64826_c0_g1_i1	---NA---	CKLF-like MARVEL transmembrane domain-containing protein	6.24472
TRINITY_DN67969_c0_g1_i3	---NA---	hypothetical protein BOX15_Mlig031370g1	6.17997
TRINITY_DN66157_c1_g1_i1	---NA---	tubulin beta chain-like	6.16599
TRINITY_DN37344_c0_g1_i2	K15103	mitochondrial uncoupling protein 2-like	6.10321
TRINITY_DN8332_c0_g1_i1	K22077	ganglioside-induced differentiation-associated protein 1-like	6.09883
TRINITY_DN69930_c0_g1_i1	---NA---	Collagen alpha-5(VI) chain	6.05801
TRINITY_DN68376_c0_g7_i1	---NA---	mannan-binding lectin serine protease 1	6.04235
TRINITY_DN10808_c0_g1_i1	---NA---	uncharacterized protein LOC112572464	6.03484
TRINITY_DN27568_c0_g1_i1	---NA---	T-box transcription factor TBX20	6.02653
TRINITY_DN67533_c2_g2_i1	K14720	zinc transporter ZIP14-like	6.00729
TRINITY_DN55125_c1_g1_i1	---NA---	retinol dehydrogenase 2-like	5.99177
TRINITY_DN61104_c0_g3_i3	---NA---	uncharacterized protein LOC111136604	5.98993
TRINITY_DN68996_c4_g2_i2	---NA---	LOW QUALITY PROTEIN: uncharacterized protein LOC111120650	5.88809
TRINITY_DN114453_c0_g1_i1	---NA---	putative defense protein	5.87434
TRINITY_DN65810_c1_g4_i1	---NA---	E-selectin-like	5.85429
TRINITY_DN66781_c1_g1_i1	---NA---	uncharacterized protein LOC110447600	5.81997
TRINITY_DN65799_c1_g3_i2	K14386	sodium-coupled monocarboxylate transporter 1-like	5.77124
TRINITY_DN47914_c0_g1_i2	K18152	ADP-ribosyl cyclase/cyclic ADP-ribose hydrolase	5.76393
TRINITY_DN67027_c2_g4_i2	---NA---	MAM and LDL-receptor class A domain-containing protein 1	5.71901
TRINITY_DN68306_c202_g9_i1	K04194	Muscarinic acetylcholine receptor M3	5.67716
TRINITY_DN67263_c1_g1_i2	K07408	steroid 17-alpha-hydroxylase/17,20 lyase	5.67501
TRINITY_DN64638_c0_g1_i5	K14386	sodium-coupled monocarboxylate transporter 1-like	5.6338
TRINITY_DN67119_c0_g2_i2	---NA---	hypothetical protein AM593_01381, partial	5.61698
TRINITY_DN67445_c5_g3_i2	K12383	ganglioside GM2 activator	5.58732
TRINITY_DN26484_c0_g1_i1	K09328	homeobox protein unc-4 homolog	5.47492
TRINITY_DN68665_c0_g3_i3	---NA---	proprotein convertase subtilisin/kexin type 5	5.46143
TRINITY_DN37542_c0_g1_i1	---NA---	uncharacterized protein LOC112573429	5.34819
TRINITY_DN51611_c0_g2_i2	---NA---	uncharacterized protein LOC110457904	5.33798
TRINITY_DN68364_c2_g4_i4	---NA---	Glucose dehydrogenase [acceptor]	5.28719
TRINITY_DN57667_c0_g1_i1	---NA---	PREDICTED: uncharacterized protein LOC105326178	5.28002
TRINITY_DN68748_c3_g5_i1	---NA---	protein-glutamine gamma-glutamyltransferase K-like	5.24602
TRINITY_DN54487_c1_g1_i1	K12026	tripartite motif-containing protein 2-like	5.22599
TRINITY_DN61899_c0_g1_i1	---NA---	Exodeoxyribonuclease III	5.22044
TRINITY_DN63257_c2_g3_i1	---NA---	transcription factor hamlet-like	5.20984
TRINITY_DN47002_c0_g1_i1	---NA---	polynucleotide adenylyltransferase	5.20602
TRINITY_DN63442_c1_g1_i1	---NA---	Tripartite motif-containing protein 3	5.20365
TRINITY_DN65839_c3_g8_i4	---NA---	predicted protein	5.18015
TRINITY_DN66322_c0_g1_i3	K14685	solute carrier family 40 member 1-like	5.15189
TRINITY_DN67101_c0_g1_i2	---NA---	contactin-like	5.13133
TRINITY_DN63308_c0_g1_i5	K19472	homeobox protein six1-like	5.10764
TRINITY_DN47097_c0_g1_i1	K03927	acetylcholinesterase	5.04174
TRINITY_DN65810_c1_g7_i1	---NA---	sushi, von Willebrand factor type A, EGF and pentraxin domain-containing protein 1-like	5.03035
TRINITY_DN68048_c3_g4_i2	---NA---	fibrinogen C domain-containing protein 1-like	5.02923
TRINITY_DN67950_c0_g1_i2	---NA---	CUB and sushi domain-containing protein 3-like	5.01759
TRINITY_DN16467_c0_g1_i1	---NA---	vitelline membrane outer layer protein 1-like	5.01116
TRINITY_DN50565_c1_g1_i1	---NA---	tubulin beta chain	5.00467
TRINITY_DN67688_c4_g1_i1	K00758	thymidine phosphorylase-like	4.94006
TRINITY_DN65238_c1_g2_i1	K12383	ganglioside GM2 activator-like	4.92499
TRINITY_DN68688_c1_g2_i11	K00698	Chitin synthase 1	4.92477
TRINITY_DN68925_c0_g1_i3	---NA---	E3 ubiquitin-protein ligase RNF213	4.91127
TRINITY_DN47200_c0_g1_i1	---NA---	GPx isotype 2	4.90508
TRINITY_DN66955_c1_g3_i1	---NA---	solute carrier family 28 member 3-like	4.86775
TRINITY_DN68866_c0_g1_i1	---NA---	uncharacterized protein LOC110443160	4.83562
TRINITY_DN62450_c1_g1_i2	K11161	retinol dehydrogenase 11-like	4.8333
TRINITY_DN67420_c0_g1_i3	---NA---	nidogen-2	4.83087
TRINITY_DN33587_c0_g1_i1	K04148	dopamine receptor 2-like	4.81872
TRINITY_DN66095_c4_g14_i1	---NA---	group II trans-sialidase superfamily	4.81556
TRINITY_DN24574_c0_g3_i2	K08753	fatty acid-binding protein, adipocyte-like	4.78427
TRINITY_DN35039_c0_g1_i1	---NA---	Sulfotransferase family cytosolic 1B member 1	4.71982
TRINITY_DN19933_c0_g1_i1	---NA---	PREDICTED: uncharacterized protein LOC105345533	4.71826
TRINITY_DN67169_c5_g5_i1	---NA---	Low-density lipoprotein receptor-related protein 6	4.71193
TRINITY_DN59715_c2_g1_i1	K16674	Protein four-jointed	4.69903
TRINITY_DN46860_c0_g2_i1	K07232	putative glutathione-specific gamma-glutamylcyclotransferase 2	4.69665
TRINITY_DN66757_c0_g2_i2	---NA---	Low-density lipoprotein receptor-related protein 1B	4.68452
TRINITY_DN63788_c1_g2_i1	---NA---	xaa-Pro aminopeptidase 1-like	4.63536
TRINITY_DN61468_c0_g3_i2	---NA---	probable E3 ubiquitin-protein ligase TRIM8	4.62597
TRINITY_DN67950_c0_g5_i8	---NA---	sushi, von Willebrand factor type A, EGF and pentraxin domain-containing protein 1	4.59225
TRINITY_DN64853_c0_g2_i2	---NA---	cadherin-like and PC-esterase domain-containing protein 1	4.58364
TRINITY_DN60521_c0_g4_i1	K01596	phosphoenolpyruvate carboxykinase, cytosolic [GTP]	4.57448
TRINITY_DN21292_c0_g1_i1	---NA---	transmembrane protein 179B-like	4.55306
TRINITY_DN55430_c0_g2_i1	---NA---	Glucose dehydrogenase [acceptor]	4.51727
TRINITY_DN47478_c0_g1_i1	---NA---	probable E3 ubiquitin-protein ligase TRIM8	4.51727
TRINITY_DN68263_c2_g2_i6	---NA---	complement receptor type 1-like	4.50286
TRINITY_DN64670_c0_g1_i2	---NA---	zinc finger protein 525-like	4.47911
TRINITY_DN67413_c0_g1_i3	---NA---	NXPE family member 3-like	4.47124
TRINITY_DN65346_c0_g1_i1	---NA---	putative per-hexamer repeat protein 5	4.46185
TRINITY_DN68162_c6_g2_i5	---NA---	Menaquinone biosynthesis methyltransferase ubiE	4.45759
TRINITY_DN63405_c0_g2_i1	---NA---	sodium-coupled monocarboxylate transporter 1-like	4.4524
TRINITY_DN68048_c3_g8_i6	K06252	fibrinogen C domain-containing protein 1-like	4.43259
TRINITY_DN67320_c2_g1_i4	---NA---	CUB and sushi domain-containing protein 3-like	4.42746
TRINITY_DN65340_c1_g1_i1	---NA---	Hypothetical protein PINS_003307, partial	4.41724
TRINITY_DN41211_c0_g1_i2	---NA---	hypothetical protein LOTGIDRAFT_205189	4.41399
TRINITY_DN9617_c0_g1_i1	---NA---	gamma-glutamyltranspeptidase 1-like	4.38449
TRINITY_DN62363_c0_g1_i2	K13868	b(0,+)-type amino acid transporter 1-like	4.3824
TRINITY_DN39235_c0_g2_i1	K04808	AGAP000962-PA-like protein	4.36217
TRINITY_DN67360_c4_g1_i8	K01593	aromatic-L-amino-acid decarboxylase-like	4.33914
TRINITY_DN52493_c0_g1_i1	---NA---	E3 ubiquitin-protein ligase TRIM56-like	4.33394
TRINITY_DN66848_c5_g1_i1	K14464	alpha-(1,3)-fucosyltransferase 5-like	4.32762
TRINITY_DN63365_c1_g2_i1	---NA---	metal tolerance protein 9-like	4.29969
TRINITY_DN40782_c0_g1_i1	---NA---	uncharacterized protein LOC110461812	4.28176
TRINITY_DN57345_c0_g2_i1	---NA---	uncharacterized protein LOC114541256	4.28156
TRINITY_DN68748_c3_g9_i1	---NA---	protein-glutamine gamma-glutamyltransferase K-like	4.27609
TRINITY_DN14867_c0_g1_i1	K01389	neprilysin-4-like	4.25429
TRINITY_DN68623_c0_g4_i6	---NA---	Yorkie-like	4.22531
TRINITY_DN12319_c0_g1_i1	K01687	dihydroxy-acid dehydratase	4.21608
TRINITY_DN29259_c0_g2_i1	K08175	sodium-dependent glucose transporter 1A-like	4.21608
TRINITY_DN48011_c1_g1_i1	---NA---	calmodulin-7-like	4.19359
TRINITY_DN65888_c0_g2_i4	K01262	xaa-Pro aminopeptidase 1	4.19166
TRINITY_DN70130_c0_g1_i1	K10955	mucin-12	4.13574
TRINITY_DN61669_c0_g1_i3	---NA---	clavesin-2-like	4.12141
TRINITY_DN48807_c0_g1_i1	K14640	sodium-dependent phosphate transporter 1-B-like	4.11195
TRINITY_DN66866_c8_g14_i1	---NA---	toll-like receptor f precursor	4.08865
TRINITY_DN68856_c0_g6_i3	---NA---	Exodeoxyribonuclease III	4.08215
TRINITY_DN68748_c3_g7_i3	---NA---	hemocyte protein-glutamine gamma-glutamyltransferase-like	4.07914
TRINITY_DN65588_c0_g3_i1	---NA---	Gamma-glutamyltranspeptidase 1	4.07549
TRINITY_DN27784_c0_g1_i1	K19017	interphotoreceptor matrix proteoglycan 2-like	4.07549
TRINITY_DN66668_c0_g2_i5	---NA---	big defensin	4.05711
TRINITY_DN55360_c0_g1_i3	---NA---	predicted protein	4.0381
TRINITY_DN64978_c0_g2_i3	---NA---	70 kDa neurofilament protein-like	4.02392
TRINITY_DN37228_c0_g1_i1	K08190	monocarboxylate transporter 5-like	4.0126
TRINITY_DN65892_c0_g1_i2	K08471	Gustatory receptor for sugar taste 64f	4.0106
TRINITY_DN67101_c0_g2_i3	K06761	contactin	4.00147
TRINITY_DN64670_c0_g2_i2	---NA---	Zinc finger protein	3.9997
TRINITY_DN66615_c0_g1_i2	K17566	protein phosphatase 1 regulatory subunit 27-like	3.99839
TRINITY_DN47061_c0_g3_i1	---NA---	low-density lipoprotein receptor-related protein 2-like	3.97351
TRINITY_DN35436_c0_g2_i1	K04077	chaperonin GroEL	3.96025
TRINITY_DN15377_c0_g1_i1	K09675	galactosylceramide sulfotransferase	3.94685
TRINITY_DN63438_c0_g1_i1	---NA---	Kynurenine formamidase	3.94685
TRINITY_DN63679_c6_g10_i2	---NA---	monocarboxylate transporter 4-like	3.9426
TRINITY_DN66058_c0_g1_i3	---NA---	Chitin synthase 6	3.91886
TRINITY_DN68748_c3_g13_i4	---NA---	hemocyte protein-glutamine gamma-glutamyltransferase-like	3.90938
TRINITY_DN68269_c0_g1_i5	---NA---	fibrillin-1-like	3.89507
TRINITY_DN63321_c6_g10_i4	K14945	protein quaking-B	3.87516
TRINITY_DN67831_c0_g4_i1	---NA---	MAM and LDL-receptor class A domain-containing protein 1-like	3.86334
TRINITY_DN67810_c0_g1_i3	K03768	peptidyl-prolyl cis-trans isomerase	3.86264
TRINITY_DN68260_c4_g3_i6	---NA---	protein dispatched	3.85566
TRINITY_DN76879_c0_g1_i1	---NA---	phosphoenolpyruvate carboxykinase	3.84329
TRINITY_DN70210_c0_g1_i1	K01915	type I glutamate--ammonia ligase	3.83502
TRINITY_DN68748_c3_g3_i3	---NA---	hemocyte protein-glutamine gamma-glutamyltransferase-like	3.82562
TRINITY_DN65663_c2_g1_i1	K03190	Urease accessory protein UreD	3.81573
TRINITY_DN25084_c0_g1_i2	K18630	tektin-3-like	3.80564
TRINITY_DN65925_c0_g3_i2	K16498	protocadherin beta-15	3.79878
TRINITY_DN34434_c0_g1_i1	---NA---	low-density lipoprotein receptor-related protein 4-like	3.79074
TRINITY_DN66159_c0_g1_i1	---NA---	sec1 family domain-containing 2-like protein	3.76565
TRINITY_DN66467_c0_g1_i1	---NA---	cytochrome P450 family 1-like 1 protein	3.76043
TRINITY_DN55816_c0_g1_i2	K00682	gamma-glutamylcyclotransferase-like	3.75736
TRINITY_DN46746_c0_g1_i1	K01389	neprilysin	3.75289
TRINITY_DN46985_c0_g1_i1	---NA---	uncharacterized protein LOC110465612	3.74505
TRINITY_DN60670_c1_g1_i1	K11536	solute carrier family 28 member 3-like	3.74309
TRINITY_DN68048_c3_g10_i1	---NA---	fibrinogen-like protein A	3.72669
TRINITY_DN62009_c0_g1_i1	---NA---	methyltransferase-like protein 27	3.72331
TRINITY_DN53814_c0_g1_i3	K05678	ATP-binding cassette sub-family D member 4-like	3.71002
TRINITY_DN63348_c0_g1_i1	K14210	neutral and basic amino acid transport protein rBAT-like	3.69893
TRINITY_DN48087_c0_g1_i1	---NA---	multiple epidermal growth factor-like domains protein 10	3.69786
TRINITY_DN24912_c0_g1_i1	---NA---	monocarboxylate transporter 12-B-like	3.68179
TRINITY_DN56604_c0_g1_i1	---NA---	uncharacterized protein LOC110461720	3.66578
TRINITY_DN50341_c0_g2_i1	K00213	7-dehydrocholesterol reductase-like	3.66553
TRINITY_DN66882_c0_g6_i1	---NA---	MAM and LDL-receptor class A domain-containing protein 2-like	3.66553
TRINITY_DN42418_c0_g2_i2	---NA---	mechanosensory protein 2-like	3.66553
TRINITY_DN52488_c0_g4_i1	---NA---	monocarboxylate transporter 12-like	3.6491
TRINITY_DN64575_c0_g2_i2	K14709	zinc transporter ZIP3-like	3.6491
TRINITY_DN68748_c3_g14_i1	---NA---	hemocyte protein-glutamine gamma-glutamyltransferase-like	3.63145
TRINITY_DN64016_c0_g8_i1	---NA---	DNA-directed RNA polymerase	3.6069
TRINITY_DN66377_c0_g1_i5	---NA---	solute carrier family 26 member 6-like	3.59326
TRINITY_DN67092_c1_g6_i1	---NA---	CUB and sushi domain-containing protein 3-like	3.58139
TRINITY_DN48700_c0_g1_i1	K01011	thiosulfate sulfurtransferase-like	3.5698
TRINITY_DN50456_c0_g1_i2	K11536	solute carrier family 28 member 3-like	3.56767
TRINITY_DN4403_c0_g1_i1	K01624	fructose-bisphosphate aldolase class II	3.56397
TRINITY_DN54175_c0_g1_i1	---NA---	SCY1-like protein 2	3.56397
TRINITY_DN64234_c1_g2_i4	---NA---	deleted in malignant brain tumors 1 protein	3.53341
TRINITY_DN43871_c0_g1_i1	---NA---	calmodulin-alpha	3.52845
TRINITY_DN65413_c12_g12_i2	---NA---	SCO-spondin-like	3.52671
TRINITY_DN68424_c2_g1_i7	---NA---	multiple epidermal growth factor-like domains protein 10	3.52624
TRINITY_DN60551_c1_g1_i1	---NA---	regucalcin	3.51499
TRINITY_DN67891_c0_g5_i1	---NA---	uncharacterized protein LOC111103829	3.51215
TRINITY_DN4516_c0_g2_i1	K21816	dissimilatory-type sulfite reductase subunit beta	3.51036
TRINITY_DN68413_c2_g5_i1	---NA---	Transient receptor potential cation channel subfamily A member 1	3.50228
TRINITY_DN67345_c0_g11_i2	---NA---	predicted protein	3.50047
TRINITY_DN64822_c0_g1_i2	K14074	pancreatic lipase-related protein 2-like	3.49785
TRINITY_DN56208_c0_g2_i1	---NA---	carbohydrate sulfotransferase 15-like	3.47349
TRINITY_DN67950_c0_g6_i1	---NA---	CUB and sushi domain-containing protein 3-like	3.47349
TRINITY_DN68727_c2_g1_i1	---NA---	brevican core protein-like	3.4547
TRINITY_DN66489_c8_g2_i7	---NA---	protein dispatched homolog 1-like	3.44561
TRINITY_DN63256_c0_g1_i1	---NA---	cathepsin L	3.43606
TRINITY_DN55911_c0_g1_i1	---NA---	hypothetical protein GUITHDRAFT_47608, partial	3.43565
TRINITY_DN61719_c0_g2_i2	K07763	matrix metalloproteinase-1	3.42874
TRINITY_DN66551_c0_g5_i3	K00272	D-aspartate oxidase-like	3.41152
TRINITY_DN67811_c1_g3_i1	---NA---	phage lysozyme 1	3.41096
TRINITY_DN64055_c1_g1_i7	---NA---	calponin homology domain-containing protein DDB_G0272472	3.40508
TRINITY_DN59276_c0_g1_i1	---NA---	monocarboxylate transporter 12-like	3.39254
TRINITY_DN64074_c0_g1_i1	---NA---	Pleckstrin homology domain-containing family G member 7	3.37853
TRINITY_DN63118_c0_g1_i3	---NA---	alkaline phosphatase	3.37697
TRINITY_DN63021_c0_g1_i2	---NA---	2208436Bhepatocyte nuclear factor	3.37048
TRINITY_DN66467_c0_g2_i1	K07408	cytochrome P450 1A1-like	3.36953
TRINITY_DN58290_c0_g1_i2	---NA---	predicted protein	3.36644
TRINITY_DN43372_c0_g2_i1	K17479	glutaredoxin domain-containing cysteine-rich protein CG31559-like	3.35905
TRINITY_DN57727_c0_g1_i1	K11182	putative amine oxidase [copper-containing]	3.35421
TRINITY_DN68369_c1_g2_i6	---NA---	sushi domain-containing protein 1-like	3.3523
TRINITY_DN62037_c0_g4_i1	K03308	sodium- and chloride-dependent glycine transporter 2-like	3.34398
TRINITY_DN67435_c2_g21_i1	K00106	xanthine dehydrogenase-like	3.33956
TRINITY_DN67323_c0_g1_i8	K14353	solute carrier organic anion transporter family member 3A1-like	3.33898
TRINITY_DN19785_c0_g1_i1	---NA---	uncharacterized protein LOC111133443	3.3158
TRINITY_DN25127_c0_g1_i1	K13781	Y+L amino acid transporter 2-like	3.29482
TRINITY_DN113864_c0_g1_i1	K15013	long-chain-fatty-acid--CoA ligase ACSBG2-like	3.29403
TRINITY_DN47590_c0_g1_i1	---NA---	conserved Plasmodium protein, unknown function	3.2784
TRINITY_DN67231_c3_g2_i1	K11810	monocarboxylate transporter 9-like	3.27658
TRINITY_DN52065_c0_g1_i2	---NA---	probable iron/ascorbate oxidoreductase DDB_G0283291	3.26567
TRINITY_DN67845_c0_g2_i1	---NA---	RNA-directed DNA polymerase from mobile element jockey-like	3.26363
TRINITY_DN68518_c1_g4_i1	---NA---	fibrillin-1-like	3.25489
TRINITY_DN63427_c0_g1_i2	---NA---	uncharacterized protein LOC110458058	3.25053
TRINITY_DN67255_c1_g7_i1	---NA---	calmodulin 3b (phosphorylase kinase, delta)	3.22999
TRINITY_DN85224_c0_g1_i1	---NA---	sulfotransferase-like protein	3.22999
TRINITY_DN64905_c0_g2_i2	---NA---	C-factor	3.22419
TRINITY_DN68980_c0_g2_i1	---NA---	ATP-binding cassette sub-family A member 1	3.21635
TRINITY_DN65346_c0_g4_i2	---NA---	brevican core protein-like	3.20771
TRINITY_DN39188_c0_g2_i1	K08285	probable E3 ubiquitin-protein ligase MID2	3.20505
TRINITY_DN51854_c0_g1_i1	K00830	serine--pyruvate aminotransferase	3.20302
TRINITY_DN66832_c1_g1_i5	---NA---	vitelline membrane outer layer protein 1	3.19617
TRINITY_DN52580_c0_g1_i1	K00286	pyrroline-5-carboxylate reductase 2-like	3.19373
TRINITY_DN104798_c0_g1_i1	---NA---	E3 ubiquitin-protein ligase Midline-1-like	3.18509
TRINITY_DN24905_c0_g1_i1	K00472	prolyl 4-hydroxylase subunit alpha-1	3.16212
TRINITY_DN5290_c0_g1_i1	---NA---	collagen alpha-1(XVI) chain	3.16192
TRINITY_DN68413_c2_g2_i1	K04984	Transient receptor potential cation channel subfamily A member 1	3.16088
TRINITY_DN68828_c2_g2_i7	---NA---	uncharacterized protein LOC111132302	3.16088
TRINITY_DN57628_c2_g4_i1	---NA---	sodium-dependent proline transporter-like	3.15567
TRINITY_DN56943_c0_g1_i1	---NA---	cytochrome P450 1A1-like	3.14318
TRINITY_DN103172_c0_g1_i1	---NA---	transmembrane protein 246-like	3.13876
TRINITY_DN64954_c0_g1_i1	K14720	zinc transporter ZIP14	3.13488
TRINITY_DN56208_c0_g1_i4	K08106	carbohydrate sulfotransferase 15-like	3.12849
TRINITY_DN50050_c0_g2_i1	K00106	xanthine dehydrogenase-like	3.12485
TRINITY_DN63826_c0_g1_i1	---NA---	uncharacterized protein LOC111114442	3.12245
TRINITY_DN108097_c0_g1_i1	K22866	tctex1 domain-containing protein 1-like	3.11502
TRINITY_DN59942_c1_g5_i2	K09866	aquaporin AQPAe	3.112
TRINITY_DN64266_c0_g4_i1	---NA---	alkaline phosphatase	3.09172
TRINITY_DN104442_c0_g1_i1	---NA---	protein APCDD1	3.08983
TRINITY_DN59667_c2_g1_i2	---NA---	uncharacterized protein LOC110445831	3.08229
TRINITY_DN67773_c1_g4_i3	---NA---	peptidase M20 domain-containing protein 2-like	3.07867
TRINITY_DN68139_c0_g2_i3	---NA---	glutamate receptor 4-like	3.07036
TRINITY_DN67435_c2_g1_i2	---NA---	xanthine dehydrogenase/oxidase-like	3.06981
TRINITY_DN52724_c0_g3_i1	---NA---	D-octopine dehydrogenase	3.06636
TRINITY_DN67657_c0_g1_i2	---NA---	Transient receptor potential cation channel subfamily A member 1-like	3.06617
TRINITY_DN60788_c0_g1_i1	---NA---	acidic repeat-containing protein-like	3.05732
TRINITY_DN65066_c0_g2_i1	K23573	Transcription elongation factor spt5	3.044
TRINITY_DN56197_c0_g1_i3	K18439	arf-GAP with Rho-GAP domain, ANK repeat and PH domain-containing protein 1-like	3.03313
TRINITY_DN68660_c0_g6_i1	---NA---	multiple epidermal growth factor-like domains protein	3.01797
TRINITY_DN66139_c0_g1_i1	---NA---	Collagen alpha-5(VI) chain	3.01211
TRINITY_DN85522_c0_g1_i1	K00052	3-isopropylmalate dehydrogenase	2.99012
TRINITY_DN4403_c0_g2_i1	---NA---	fructose-bisphosphate aldolase class II	2.99012
TRINITY_DN800_c0_g1_i1	K00710	polypeptide N-acetylgalactosaminyltransferase 5	2.98338
TRINITY_DN46916_c0_g1_i1	---NA---	predicted protein	2.97835
TRINITY_DN68340_c1_g1_i3	K23617	acyl-CoA synthetase family member 2, mitochondrial	2.97719
TRINITY_DN68716_c0_g12_i3	---NA---	uncharacterized protein LOC111134521	2.97418
TRINITY_DN61899_c0_g2_i1	---NA---	hypothetical protein, partial	2.96379
TRINITY_DN5563_c0_g1_i1	---NA---	plasminogen-like	2.96379
TRINITY_DN63333_c0_g1_i1	---NA---	PREDICTED: uncharacterized protein LOC105324288	2.96316
TRINITY_DN68489_c2_g4_i17	---NA---	hypothetical protein CAPTEDRAFT_229063	2.9585
TRINITY_DN68508_c4_g2_i1	K04145	tyramine receptor Ser-2	2.95236
TRINITY_DN64661_c3_g2_i1	K15616	eyes absent homolog 1-like	2.94248
TRINITY_DN78606_c0_g1_i1	---NA---	Contactin	2.93696
TRINITY_DN24554_c0_g2_i1	---NA---	contactin	2.93696
TRINITY_DN43806_c0_g1_i1	---NA---	short-chain collagen C4-like	2.93282
TRINITY_DN68593_c6_g6_i1	---NA---	Multiple epidermal growth factor-like domains	2.92763
TRINITY_DN67786_c0_g3_i2	K01446	peptidoglycan recognition protein 2	2.92188
TRINITY_DN67449_c1_g9_i4	K07426	phylloquinone omega-hydroxylase CYP4F2	2.92183
TRINITY_DN68349_c11_g1_i1	---NA---	calmodulin-A-like	2.9214
TRINITY_DN2818_c0_g1_i1	K20989	DUR3-like urea-proton symporter	2.91289
TRINITY_DN5222_c0_g1_i1	K05016	H(+)/Cl(-) exchange transporter 7-like	2.90964
TRINITY_DN68159_c4_g1_i1	---NA---	putative ferric-chelate reductase 1	2.89954
TRINITY_DN38201_c0_g2_i1	---NA---	fibroblast growth factor receptor 4-like	2.89829
TRINITY_DN68846_c5_g4_i9	---NA---	Exodeoxyribonuclease III	2.8837
TRINITY_DN68858_c1_g6_i1	---NA---	PREDICTED: uncharacterized protein LOC103278197	2.88196
TRINITY_DN4574_c0_g1_i1	---NA---	uncharacterized protein LOC110466546	2.88179
TRINITY_DN40289_c0_g1_i1	---NA---	leucine-rich repeat protein lrrA-like	2.87697
TRINITY_DN66306_c8_g6_i1	---NA---	peroxidasin homolog	2.86785
TRINITY_DN68296_c1_g1_i10	K05038	sodium- and chloride-dependent neutral and basic amino acid transporter B(0+)-like	2.86427
TRINITY_DN51828_c0_g1_i1	---NA---	protein tweety homolog 1-like	2.84597
TRINITY_DN6499_c0_g1_i1	---NA---	protein rolling stone-like	2.83968
TRINITY_DN68989_c8_g6_i4	---NA---	nephrin-like	2.8268
TRINITY_DN19678_c0_g1_i1	---NA---	NACHT and WD repeat domain-containing protein 2-like	2.8244
TRINITY_DN63052_c0_g2_i5	---NA---	Williams-Beuren syndrome chromosomal region 27 protein-like	2.81496
TRINITY_DN24458_c0_g2_i1	K00019	D-beta-hydroxybutyrate dehydrogenase, mitochondrial-like	2.80414
TRINITY_DN59544_c0_g1_i1	---NA---	Malate dehydrogenase	2.80275
TRINITY_DN68980_c0_g1_i1	---NA---	ATP-binding cassette sub-family A member 1	2.79578
TRINITY_DN67750_c6_g5_i1	K01128	acid sphingomyelinase-like phosphodiesterase 3b	2.78769
TRINITY_DN50808_c0_g1_i3	K12657	delta-1-pyrroline-5-carboxylate synthase	2.77343
TRINITY_DN4438_c0_g1_i1	K00456	cysteine dioxygenase type 1-like	2.76842
TRINITY_DN54595_c1_g2_i1	---NA---	PREDICTED: uncharacterized protein LOC105341287	2.76609
TRINITY_DN66490_c0_g2_i6	K16506	Protocadherin Fat 1	2.76514
TRINITY_DN78370_c0_g1_i1	---NA---	C1q domain-containing protein DC29	2.76466
TRINITY_DN47061_c0_g2_i1	---NA---	low-density lipoprotein receptor-related protein	2.76466
TRINITY_DN50989_c0_g1_i1	---NA---	nuclear factor erythroid 2-related factor 2	2.76466
TRINITY_DN9021_c0_g1_i1	---NA---	unnamed protein product (mitochondrion)	2.76466
TRINITY_DN67923_c3_g2_i9	---NA---	uncharacterized protein LOC110466572	2.75398
TRINITY_DN105482_c0_g1_i1	---NA---	sodium-dependent proline transporter-like	2.75246
TRINITY_DN61468_c0_g1_i1	---NA---	tripartite motif-containing protein 5-like	2.73385
TRINITY_DN61087_c1_g1_i1	---NA---	hypothetical protein EMIHUDRAFT_453585	2.7321
TRINITY_DN68137_c5_g1_i4	K08202	organic cation transporter protein-like	2.72939
TRINITY_DN68159_c3_g3_i1	---NA---	putative RNA-directed DNA polymerase from mobile element jockey-like	2.72425
TRINITY_DN47099_c0_g1_i2	---NA---	sulfotransferase 1 family member D1-like	2.71865
TRINITY_DN35722_c0_g2_i1	K23096	repulsive guidance molecule A	2.71434
TRINITY_DN63303_c1_g1_i1	K18808	toll-like receptor 3	2.71417
TRINITY_DN52313_c0_g1_i1	K09216	Protein ovo	2.71375
TRINITY_DN64623_c0_g3_i1	---NA---	proline-rich receptor-like protein kinase PERK10	2.7126
TRINITY_DN38167_c0_g1_i1	K07412	cytochrome P450	2.70263
TRINITY_DN106596_c0_g1_i1	---NA---	glycosyltransferase family 92 protein F13G3	2.70236
TRINITY_DN9903_c0_g1_i1	---NA---	TNF receptor-associated factor family protein DDB_G0272098-like	2.70236
TRINITY_DN44290_c0_g2_i1	---NA---	uncharacterized protein LOC110462482	2.70236
TRINITY_DN64996_c11_g14_i6	---NA---	receptor-transporting protein 3	2.68836
TRINITY_DN68694_c0_g4_i7	---NA---	RNA-directed DNA polymerase from mobile element jockey	2.67383
TRINITY_DN62867_c0_g1_i1	---NA---	LOW QUALITY PROTEIN: uncharacterized protein LOC112562012	2.6707
TRINITY_DN112638_c0_g1_i1	K00602	bifunctional phosphoribosylaminoimidazolecarboxamide formyltransferase/IMP cyclohydrolase	2.67015
TRINITY_DN67891_c0_g2_i1	---NA---	uncharacterized protein LOC110462097	2.66392
TRINITY_DN64507_c0_g2_i5	K05693	receptor-type tyrosine-protein phosphatase mu-like	2.66143
TRINITY_DN38070_c0_g1_i1	---NA---	PREDICTED: mucin-1-like	2.65967
TRINITY_DN68080_c2_g1_i2	---NA---	Transient receptor potential cation channel subfamily M member 2	2.65715
TRINITY_DN68767_c0_g1_i8	---NA---	DDE-type integrase/transposase/recombinase	2.65559
TRINITY_DN63973_c0_g2_i1	K01389	neprilysin	2.65499
TRINITY_DN67434_c1_g1_i2	---NA---	Tyrosine-protein phosphatase non-receptor type 6	2.65107
TRINITY_DN68915_c5_g18_i1	---NA---	Williams-Beuren syndrome chromosomal region 27 protein-like	2.64804
TRINITY_DN52028_c0_g1_i1	K01672	GPI-anchored carbonic anhydrase	2.6421
TRINITY_DN63438_c0_g2_i1	---NA---	Kynurenine formamidase	2.64066
TRINITY_DN68230_c0_g2_i1	---NA---	hypothetical protein KP79_PYT05356	2.63767
TRINITY_DN67092_c1_g8_i2	---NA---	Sushi, von Willebrand factor type A, EGF and pentraxin domain-containing protein 1	2.63723
TRINITY_DN49971_c0_g1_i1	K07819	beta-1,3-galactosyltransferase 1-like	2.62905
TRINITY_DN66203_c0_g2_i4	---NA---	interferon alpha-inducible protein 27-like protein 2B	2.62164
TRINITY_DN66390_c10_g1_i3	---NA---	A-kinase anchor protein 5-like	2.62163
TRINITY_DN68753_c0_g2_i6	K18334	mitochondrial enolase superfamily member 1-like	2.61178
TRINITY_DN68467_c3_g8_i1	K10808	RecName: Full=Ribonucleoside-diphosphate reductase small chain; AltName: Full=Ribonucleotide reductase small subunit; AltName: Full=p41	2.61041
TRINITY_DN16060_c0_g1_i1	K04715	ceramide kinase-like	2.60353
TRINITY_DN63055_c0_g4_i1	---NA---	homeobox protein caupolican-like	2.60353
TRINITY_DN103568_c0_g1_i1	---NA---	RNA-directed DNA polymerase from mobile element jockey	2.60353
TRINITY_DN50855_c0_g3_i1	---NA---	uncharacterized protein LOC106173528	2.60353
TRINITY_DN68748_c3_g6_i1	---NA---	hemocyte protein-glutamine gamma-glutamyltransferase-like	2.57793
TRINITY_DN63569_c0_g1_i1	K16498	protocadherin-9	2.57284
TRINITY_DN112079_c0_g1_i1	---NA---	1-phosphatidylinositol 4,5-bisphosphate phosphodiesterase epsilon-1	2.56904
TRINITY_DN68376_c0_g14_i1	---NA---	CUB and sushi domain-containing protein 1-like	2.56904
TRINITY_DN19757_c0_g1_i1	K09866	aquaporin AQPAn	2.56874
TRINITY_DN4700_c0_g1_i1	---NA---	calmodulin, putative	2.56874
TRINITY_DN68151_c0_g4_i2	K14611	solute carrier family 23 member 1-like	2.5652
TRINITY_DN62808_c0_g4_i1	K02375	frizzled-5-like	2.56203
TRINITY_DN65780_c0_g2_i2	K05038	sodium-dependent proline transporter-like	2.55466
TRINITY_DN20466_c0_g1_i1	---NA---	transmembrane protein 180-like	2.5468
TRINITY_DN59070_c0_g2_i1	---NA---	uncharacterized protein LOC111123190	2.53686
TRINITY_DN3141_c0_g1_i1	---NA---	cell death abnormality protein 1-like	2.5337
TRINITY_DN58498_c0_g2_i1	---NA---	Glutamine-rich protein	2.5337
TRINITY_DN33036_c0_g2_i1	---NA---	solute carrier organic anion transporter family member 3A1-like	2.5337
TRINITY_DN80462_c0_g1_i1	---NA---	calmodulin cam-206	2.53298
TRINITY_DN67363_c0_g6_i14	---NA---	trichohyalin-like	2.52876
TRINITY_DN66142_c1_g1_i1	---NA---	THAP domain-containing protein 9	2.52472
TRINITY_DN36647_c0_g1_i1	---NA---	Leucine-rich repeats and immunoglobulin-like domains protein 3	2.52248
TRINITY_DN65959_c13_g1_i2	K04887	potassium voltage-gated channel protein Shaw-like	2.51381
TRINITY_DN64499_c0_g3_i1	---NA---	PREDICTED: uncharacterized protein LOC105331627	2.51168
TRINITY_DN37199_c0_g1_i1	---NA---	retinol dehydrogenase 7-like	2.51072
TRINITY_DN66107_c0_g1_i1	---NA---	toll-like receptor 4	2.50946
TRINITY_DN67216_c9_g2_i2	K09203	early growth response protein 2-like	2.50776
TRINITY_DN68179_c1_g3_i1	K05094	uncharacterized protein LOC110457120	2.49761
TRINITY_DN66852_c1_g5_i2	---NA---	Coagulation factor XIIa	2.49746
TRINITY_DN41537_c0_g1_i1	K23531	calmodulin	2.49483
TRINITY_DN64844_c1_g1_i1	---NA---	Universal stress protein A-like protein	2.49483
TRINITY_DN38201_c0_g1_i1	K05093	fibroblast growth factor receptor 4	2.49099
TRINITY_DN178_c0_g1_i1	K04097	Glutathione S-transferase 1	2.49071
TRINITY_DN65888_c0_g1_i1	K01594	cysteine sulfinic acid decarboxylase	2.4888
TRINITY_DN56911_c0_g1_i2	---NA---	threonine synthase-like 1	2.48517
TRINITY_DN46713_c0_g1_i1	---NA---	uncharacterized protein LOC111416210	2.48409
TRINITY_DN67437_c1_g1_i1	---NA---	uncharacterized protein LOC115095614	2.48317
TRINITY_DN68997_c1_g1_i2	K10955	mucin-4-like	2.47546
TRINITY_DN68580_c2_g10_i3	---NA---	Exodeoxyribonuclease III	2.47464
TRINITY_DN66882_c0_g7_i1	---NA---	MAM and LDL-receptor class A domain-containing protein 2-like	2.46031
TRINITY_DN18057_c0_g2_i1	---NA---	uncharacterized protein LOC111134313	2.46031
TRINITY_DN68421_c0_g1_i2	K16288	dual serine/threonine and tyrosine protein kinase-like	2.45661
TRINITY_DN68230_c1_g1_i1	---NA---	uncharacterized protein LOC110446311	2.45543
TRINITY_DN60340_c1_g1_i3	K10456	kelch-like ECH-associated protein 1	2.4516
TRINITY_DN25796_c0_g1_i1	K04097	glutathione S-transferase	2.44983
TRINITY_DN43308_c0_g1_i1	K17382	Serine beta-lactamase-like protein LACTB, mitochondrial	2.44883
TRINITY_DN68924_c2_g1_i1	---NA---	adhesion G-protein coupled receptor G2-like	2.44069
TRINITY_DN61512_c0_g3_i1	K00718	galactoside 2-alpha-L-fucosyltransferase 1-like	2.43903
TRINITY_DN66274_c1_g2_i4	K11810	Monocarboxylate transporter 12	2.43622
TRINITY_DN67467_c5_g1_i1	---NA---	autocrine proliferation repressor protein A	2.42375
TRINITY_DN66027_c0_g1_i8	K04437	filamin-B-like	2.4224
TRINITY_DN35217_c0_g1_i1	---NA---	paired box protein Pax-6-like	2.42218
TRINITY_DN51699_c0_g1_i1	---NA---	zinc finger protein 626-like	2.42218
TRINITY_DN52969_c0_g2_i1	K01904	probable 4-coumarate--CoA ligase 5	2.4165
TRINITY_DN39109_c0_g1_i1	---NA---	Sodium- and chloride-dependent GABA transporter ine	2.39474
TRINITY_DN24968_c0_g1_i1	---NA---	PREDICTED: uncharacterized protein LOC105334412	2.38498
TRINITY_DN85772_c0_g1_i1	---NA---	Kynurenine formamidase	2.3835
TRINITY_DN60327_c0_g3_i2	---NA---	cell division protein FtsK	2.383
TRINITY_DN17423_c0_g1_i1	K23612	neural Wiskott-Aldrich syndrome protein	2.383
TRINITY_DN28951_c0_g2_i1	---NA---	phosphoenolpyruvate synthase	2.383
TRINITY_DN62713_c0_g1_i2	---NA---	amyloid protein-binding protein 2-like	2.38226
TRINITY_DN26294_c0_g1_i1	---NA---	Mitosis inhibitor protein kinase wee1	2.38212
TRINITY_DN67530_c2_g5_i4	K05313	glutamate receptor subunit protein GluR2 precursor	2.36967
TRINITY_DN67027_c2_g6_i5	---NA---	MAM and LDL-receptor class A domain-containing protein 1-like	2.36309
TRINITY_DN94941_c0_g1_i1	K20776	fibrillin-1-like	2.35524
TRINITY_DN55534_c0_g1_i1	K12301	sialin-like	2.34275
TRINITY_DN25036_c0_g1_i1	---NA---	toll-like receptor	2.34275
TRINITY_DN32326_c0_g1_i1	---NA---	uncharacterized protein LOC114974228	2.34275
TRINITY_DN67742_c4_g6_i2	K20644	Rho GTPase-activating protein 29	2.3224
TRINITY_DN67298_c1_g1_i1	---NA---	hypothetical protein EGW08_013324	2.31695
TRINITY_DN67726_c0_g3_i1	---NA---	salivary glue protein Sgs-3-like	2.30564
TRINITY_DN66255_c0_g1_i2	---NA---	uncharacterized protein LOC114974227	2.30564
TRINITY_DN68373_c2_g1_i1	---NA---	PREDICTED: uncharacterized protein LOC105332551	2.30338
TRINITY_DN68901_c6_g2_i1	---NA---	receptor-type tyrosine-protein phosphatase T-like	2.30253
TRINITY_DN56061_c0_g1_i1	---NA---	Protein mab-21	2.3019
TRINITY_DN66882_c0_g2_i1	---NA---	MAM and LDL-receptor class A domain-containing protein 2	2.30134
TRINITY_DN53963_c0_g1_i2	---NA---	protein PBMUCL2-like	2.30134
TRINITY_DN65751_c0_g1_i2	K05701	tight junction protein ZO-1-like	2.30134
TRINITY_DN62037_c0_g3_i1	---NA---	sodium- and chloride-dependent glycine transporter 1-like	2.30071
TRINITY_DN66832_c1_g8_i5	---NA---	Uncharacterized protein APZ42_026304	2.29235
TRINITY_DN67696_c0_g15_i1	K07865	cell division control protein 42 homolog	2.29048
TRINITY_DN35999_c0_g1_i1	---NA---	putative plant-specific domain protein	2.28717
TRINITY_DN63588_c1_g2_i1	---NA---	cytochrome P450 family 4	2.28259
TRINITY_DN11863_c0_g1_i1	K04097	sigma glutathione S-transferase 3	2.28259
TRINITY_DN53620_c1_g1_i4	K20526	Muscle-specific protein 20	2.28147
TRINITY_DN31789_c0_g2_i1	---NA---	complement C1q tumor necrosis factor-related protein 1-like	2.27846
TRINITY_DN63953_c4_g1_i1	---NA---	protein sel-1 homolog 3-like	2.27454
TRINITY_DN45910_c0_g1_i1	---NA---	ADAM family mig-17	2.25872
TRINITY_DN7191_c0_g2_i1	---NA---	lipase ZK262	2.25872
TRINITY_DN3250_c0_g1_i1	---NA---	Methyltransferase type 11 domain containing protein	2.25872
TRINITY_DN53585_c1_g2_i1	---NA---	Phosphatidylinositol 3,4,5-trisphosphate 5-phosphatase 2	2.25872
TRINITY_DN70711_c0_g1_i1	---NA---	sodium- and chloride-dependent neutral and basic amino acid transporter B(0+)-like	2.25872
TRINITY_DN66496_c5_g1_i1	K08964	methylthioribulose-1-phosphate dehydratase	2.25835
TRINITY_DN62524_c1_g1_i1	---NA---	cell number regulator 10-like	2.25475
TRINITY_DN68668_c1_g2_i1	---NA---	fusarin C synthetase-like	2.2537
TRINITY_DN57333_c0_g1_i1	K05860	1-phosphatidylinositol 4,5-bisphosphate phosphodiesterase epsilon-1	2.24103
TRINITY_DN68960_c2_g1_i1	---NA---	helicase with zinc finger domain 2-like	2.23407
TRINITY_DN61963_c0_g2_i2	K05658	multidrug resistance protein 1-like	2.23361
TRINITY_DN31542_c0_g1_i1	---NA---	sodium- and chloride-dependent neutral and basic amino acid transporter B(0+)-like	2.23295
TRINITY_DN65016_c0_g1_i1	K09040	nuclear factor erythroid 2-related factor 2	2.22907
TRINITY_DN68808_c1_g1_i1	K10775	phenylalanine ammonia-lyase 2-like	2.22478
TRINITY_DN48261_c0_g1_i1	K19919	cysteine-rich venom protein ophanin-like	2.21858
TRINITY_DN64199_c1_g7_i2	K01011	thiosulfate sulfurtransferase-like	2.21594
TRINITY_DN65873_c10_g1_i10	K00522	ferritin 2	2.21538
TRINITY_DN34874_c0_g2_i1	K01251	adenosylhomocysteinase B-like	2.21481
TRINITY_DN94485_c0_g1_i1	---NA---	syntaxin-1B-like	2.21481
TRINITY_DN66786_c0_g2_i1	---NA---	Kyphoscoliosis peptidase	2.21438
TRINITY_DN68296_c1_g4_i1	K10645	E3 ubiquitin-protein ligase mind-bomb-like	2.21001
TRINITY_DN66702_c5_g1_i1	K05759	profilin	2.20726
TRINITY_DN51059_c0_g1_i1	---NA---	Multidrug resistance-associated protein	2.20623
TRINITY_DN67278_c0_g3_i3	---NA---	putative DNA polymerase	2.19785
TRINITY_DN68369_c0_g3_i1	---NA---	sushi domain-containing protein	2.19695
TRINITY_DN65766_c3_g2_i1	---NA---	uncharacterized protein PFB0145c-like	2.19486
TRINITY_DN67927_c0_g9_i1	---NA---	RNA-directed DNA polymerase from mobile element jockey-like	2.1779
TRINITY_DN68738_c2_g1_i3	---NA---	serine/threonine-protein kinase/endoribonuclease IRE1-like protein	2.17605
TRINITY_DN63765_c0_g3_i2	---NA---	zinc transporter ZIP14-like	2.16781
TRINITY_DN67396_c0_g1_i1	---NA---	PREDICTED: uncharacterized protein LOC105338978	2.15889
TRINITY_DN66518_c0_g1_i2	---NA---	Kinesin light chain	2.15849
TRINITY_DN68991_c5_g2_i1	K05658	ABCB/P-glycoprotein-like protein	2.15828
TRINITY_DN67840_c0_g3_i10	---NA---	Ras family protein	2.15103
TRINITY_DN66062_c1_g1_i3	---NA---	Small glutamine-rich tetratricopeptide repeat-containing protein alpha	2.15002
TRINITY_DN60654_c0_g1_i1	---NA---	tripartite motif-containing protein 5-like	2.13536
TRINITY_DN63268_c0_g1_i1	---NA---	collagen alpha-2(IV) chain-like	2.1317
TRINITY_DN66505_c3_g2_i3	K05038	sodium- and chloride-dependent glycine transporter 1-like	2.13061
TRINITY_DN72188_c0_g1_i1	---NA---	sushi, von Willebrand factor type A, EGF and pentraxin domain-containing protein 1	2.12843
TRINITY_DN68960_c2_g2_i3	---NA---	Helicase with zinc finger domain 2	2.12517
TRINITY_DN6797_c0_g1_i1	---NA---	carbohydrate sulfotransferase 5-like	2.12277
TRINITY_DN61192_c0_g1_i1	K04437	filamin-A	2.11496
TRINITY_DN64757_c0_g1_i1	---NA---	nuclear receptor subfamily 0 group B member 1-like	2.11319
TRINITY_DN67205_c0_g1_i2	---NA---	metabotropic glutamate receptor 1-like	2.11243
TRINITY_DN65766_c4_g1_i1	---NA---	glutathione S-transferase	2.11137
TRINITY_DN53125_c0_g2_i1	---NA---	membrane progestin receptor beta-like	2.1093
TRINITY_DN67451_c0_g3_i1	---NA---	Protocadherin Fat 4	2.10843
TRINITY_DN56330_c0_g2_i1	---NA---	stromal cell-derived factor 2-like	2.10503
TRINITY_DN49334_c0_g1_i1	---NA---	uncharacterized protein LOC106169590	2.10379
TRINITY_DN67824_c1_g2_i1	K15711	Helicase-like transcription factor	2.0997
TRINITY_DN68728_c4_g1_i5	---NA---	low-density lipoprotein receptor-related protein 6	2.08854
TRINITY_DN49303_c0_g1_i2	---NA---	MAM and LDL-receptor class A domain-containing protein 1	2.0843
TRINITY_DN61065_c1_g2_i1	---NA---	Metabotropic glutamate receptor 2	2.0838
TRINITY_DN85360_c0_g1_i1	---NA---	carboxypeptidase B	2.08088
TRINITY_DN61078_c0_g2_i1	---NA---	methyltransferase-like protein 24	2.07866
TRINITY_DN84905_c0_g1_i1	K02934	60S ribosomal protein L6	2.07448
TRINITY_DN18378_c0_g1_i1	---NA---	A disintegrin and metalloproteinase with thrombospondin motifs 18	2.07448
TRINITY_DN95096_c0_g1_i1	---NA---	hypothetical protein	2.07448
TRINITY_DN15755_c0_g2_i1	---NA---	PREDICTED: uncharacterized protein LOC103576032	2.07448
TRINITY_DN64991_c2_g6_i1	---NA---	monocarboxylate transporter 9-like	2.07333
TRINITY_DN67574_c0_g3_i1	---NA---	caspase Dronc	2.06676
TRINITY_DN67049_c5_g1_i1	K14718	zinc transporter ZIP10	2.05802
TRINITY_DN67613_c4_g5_i4	---NA---	Zinc finger BED domain-containing protein 4	2.05564
TRINITY_DN68670_c0_g3_i1	---NA---	Putative serine/threonine-protein kinase pats1	2.05459
TRINITY_DN85367_c0_g1_i1	---NA---	coadhesin-like	2.04845
TRINITY_DN66333_c2_g3_i2	---NA---	granulins-like	2.04483
TRINITY_DN66532_c0_g1_i1	---NA---	uncharacterized protein LOC112042490	2.03843
TRINITY_DN63331_c0_g2_i1	K13524	4-aminobutyrate aminotransferase, mitochondrial-like	2.02796
TRINITY_DN77882_c0_g1_i1	---NA---	aquaporin-1-like	2.0245
TRINITY_DN43951_c0_g3_i1	---NA---	hypothetical protein CGI_10017945	2.0245
TRINITY_DN85861_c0_g1_i1	---NA---	SCO-spondin-like	2.0245
TRINITY_DN33056_c0_g1_i1	---NA---	sodium-dependent glucose transporter 1B-like	2.0245
TRINITY_DN7108_c0_g2_i1	K19655	spermatogenesis-associated protein 7-like	2.0245
TRINITY_DN39428_c0_g2_i1	---NA---	xanthine dehydrogenase-like	2.0245
TRINITY_DN66448_c0_g2_i3	K15909	phosphatidylinositol 3,4,5-trisphosphate 5-phosphatase 2	2.01904
TRINITY_DN66393_c0_g2_i2	---NA---	solute carrier family 23 member 1-like	2.01878
TRINITY_DN68466_c2_g10_i6	---NA---	hypothetical protein BRAFLDRAFT_219763	2.01584
TRINITY_DN26513_c0_g1_i2	---NA---	serine/threonine-protein phosphatase 6 regulatory ankyrin repeat subunit B-like	2.01315
TRINITY_DN12436_c0_g1_i1	K00939	adenylate kinase 2, mitochondrial-like	2.0091
TRINITY_DN29549_c0_g1_i1	---NA---	Monocarboxylate transporter 9	2.00649
TRINITY_DN65178_c7_g4_i1	---NA---	Protein flp	1.99857
TRINITY_DN68407_c0_g1_i1	K01952	Phosphoribosylformylglycinamidine synthase	1.99687
TRINITY_DN67763_c0_g1_i8	---NA---	titin	1.99488
TRINITY_DN67248_c0_g1_i1	---NA---	uncharacterized protein LOC110446012	1.98889
TRINITY_DN68622_c0_g7_i1	K04392	ras-related C3 botulinum toxin substrate 1	1.98835
TRINITY_DN65186_c4_g1_i1	K01469	5-oxoprolinase-like	1.98
TRINITY_DN64815_c0_g1_i1	K08106	carbohydrate sulfotransferase 15-like	1.97917
TRINITY_DN61612_c0_g1_i1	K01183	Acidic mammalian chitinase	1.97866
TRINITY_DN63076_c0_g3_i1	---NA---	RNA-directed DNA polymerase from mobile element jockey-like	1.97582
TRINITY_DN38171_c0_g1_i1	---NA---	Chitin synthase 1	1.97276
TRINITY_DN65499_c0_g3_i1	---NA---	neogenin	1.97211
TRINITY_DN65024_c0_g1_i1	K08220	feline leukemia virus subgroup C receptor-related protein 2	1.96936
TRINITY_DN64375_c0_g1_i1	K13707	protein ABHD15-like	1.96147
TRINITY_DN68895_c2_g7_i1	---NA---	MAM and LDL-receptor class A domain-containing protein 1-like	1.96103
TRINITY_DN66784_c2_g1_i7	---NA---	zinc finger BED domain-containing protein 4-like	1.9504
TRINITY_DN60328_c0_g1_i1	---NA---	oxidative stress-induced growth inhibitor 2-like	1.94305
TRINITY_DN68668_c1_g3_i2	---NA---	Phthiocerol synthesis polyketide synthase type I PpsD	1.93932
TRINITY_DN66043_c1_g1_i7	---NA---	tetratricopeptide repeat protein 38	1.93765
TRINITY_DN64401_c1_g3_i4	K08765	carnitine O-palmitoyltransferase 1, liver	1.93729
TRINITY_DN66925_c2_g8_i1	K15046	influenza virus NS1A-binding protein-like	1.93517
TRINITY_DN52313_c1_g1_i1	---NA---	deleted in malignant brain tumors 1 protein-like	1.93506
TRINITY_DN52625_c0_g1_i1	---NA---	low-density lipoprotein receptor-related protein 6	1.93473
TRINITY_DN67761_c1_g2_i1	---NA---	hypothetical protein LOTGIDRAFT_229168	1.93098
TRINITY_DN68954_c0_g13_i1	---NA---	PREDICTED: uncharacterized protein LOC102806266, partial	1.93088
TRINITY_DN67593_c3_g8_i1	---NA---	uncharacterized protein LOC110455974	1.92612
TRINITY_DN45295_c0_g1_i1	K10896	Fanconi anemia group M protein-like	1.92376
TRINITY_DN68322_c2_g4_i1	K23687	Protein sprint	1.92141
TRINITY_DN19147_c0_g1_i1	---NA---	A disintegrin and metalloproteinase with thrombospondin motifs 1	1.91908
TRINITY_DN39120_c1_g1_i1	---NA---	E3 ubiquitin-protein ligase TRIM71	1.91908
TRINITY_DN11123_c0_g1_i1	---NA---	elongation factor Tu	1.91908
TRINITY_DN15022_c0_g1_i1	K10896	Fanconi anemia group M protein	1.91908
TRINITY_DN67921_c0_g2_i1	K01487	Guanine deaminase	1.91908
TRINITY_DN22461_c0_g2_i1	---NA---	hypothetical protein OCBIM_22038045mg	1.91908
TRINITY_DN14701_c0_g2_i1	K02314	replicative DNA helicase	1.91908
TRINITY_DN70522_c0_g1_i1	---NA---	uncharacterized protein LOC111133202	1.91908
TRINITY_DN925_c0_g1_i1	---NA---	Insulin-like growth factor 1 receptor	1.91776
TRINITY_DN68333_c3_g3_i1	---NA---	interferon-inducible GTPase	1.91776
TRINITY_DN67686_c0_g1_i1	---NA---	beta-galactosidase-like	1.91627
TRINITY_DN67587_c3_g1_i1	K10185	T-box transcription factor TBX20	1.91503
TRINITY_DN67920_c0_g1_i2	---NA---	hypothetical protein LOTGIDRAFT_164534	1.91078
TRINITY_DN62953_c0_g1_i1	---NA---	multidrug resistance protein 1-like	1.91059
TRINITY_DN61241_c0_g1_i1	K08515	vesicle-associated membrane protein 711-like	1.90975
TRINITY_DN64917_c0_g1_i7	K04920	potassium channel subfamily K member 2-like	1.90514
TRINITY_DN62459_c0_g1_i1	---NA---	uncharacterized protein LOC111101111	1.90213
TRINITY_DN61400_c0_g1_i2	K01586	diaminopimelate decarboxylase 2, chloroplastic-like	1.90197
TRINITY_DN14039_c0_g1_i1	K04194	cholecystokinin receptor type A-like	1.90107
TRINITY_DN68991_c6_g2_i2	---NA---	multidrug resistance protein 1-like	1.90098
TRINITY_DN88013_c0_g1_i1	---NA---	placenta-specific gene 8 protein-like	1.90098
TRINITY_DN4264_c0_g2_i1	---NA---	glycine-rich cell wall structural protein	1.89547
TRINITY_DN68979_c11_g3_i18	---NA---	hypothetical protein	1.89398
TRINITY_DN67211_c0_g2_i7	---NA---	BTB and MATH domain-containing protein 36	1.89289
TRINITY_DN66497_c1_g1_i2	K02513	heparan sulfate 2-O-sulfotransferase 1-like	1.89061
TRINITY_DN68980_c0_g3_i2	---NA---	ATP-binding cassette sub-family A member 1	1.88878
TRINITY_DN27214_c0_g1_i1	K01724	pterin-4-alpha-carbinolamine dehydratase-like	1.88872
TRINITY_DN67990_c0_g1_i3	K06762	Contactin	1.88711
TRINITY_DN64650_c0_g1_i1	---NA---	UPF0394 inner membrane protein yeeE	1.8822
TRINITY_DN67220_c0_g2_i1	---NA---	Ice nucleation protein	1.88119
TRINITY_DN67063_c3_g1_i2	---NA---	tumor necrosis factor ligand superfamily member	1.87786
TRINITY_DN67023_c0_g1_i28	K10356	unconventional myosin-Ia	1.87082
TRINITY_DN8541_c0_g1_i1	K09317	homeobox protein EMX2	1.86336
TRINITY_DN34315_c0_g2_i1	---NA---	hypothetical protein AC249_AIPGENE21804	1.86336
TRINITY_DN66633_c6_g1_i1	---NA---	hypothetical protein CGI_10013753	1.86336
TRINITY_DN103051_c0_g1_i1	---NA---	molecular chaperone DnaK	1.86336
TRINITY_DN29173_c0_g1_i1	---NA---	protein dispatched homolog 3-like	1.86336
TRINITY_DN34605_c0_g1_i1	---NA---	SPRY domain-containing SOCS box protein 1-like	1.86336
TRINITY_DN66644_c0_g4_i1	K06563	CDK5 regulatory subunit-associated protein 3	1.86267
TRINITY_DN68821_c1_g3_i3	K12373	uncharacterized protein LOC112571470	1.86065
TRINITY_DN66983_c7_g2_i1	K22193	Golgi pH regulator B-like	1.85814
TRINITY_DN52495_c0_g1_i1	K11536	solute carrier family 28 member 3-like	1.85755
TRINITY_DN66529_c0_g1_i2	K01183	Acidic mammalian chitinase	1.85412
TRINITY_DN67255_c1_g1_i2	---NA---	hypothetical protein B5V51_7103	1.85183
TRINITY_DN68014_c0_g2_i2	---NA---	protein crumbs-like	1.84993
TRINITY_DN52689_c0_g1_i1	---NA---	uncharacterized protein LOC111126371	1.84965
TRINITY_DN64973_c0_g3_i2	K01681	cytoplasmic aconitate hydratase	1.84723
TRINITY_DN35436_c0_g3_i1	---NA---	carboxylesterase 5A	1.84715
TRINITY_DN62842_c0_g4_i1	---NA---	probable E3 ubiquitin-protein ligase TRIM8	1.84678
TRINITY_DN67927_c0_g10_i3	---NA---	RNA-directed DNA polymerase from mobile element jockey	1.84669
TRINITY_DN6567_c0_g1_i1	---NA---	soluble guanylate cyclase 88E-like	1.8452
TRINITY_DN65919_c0_g1_i1	K20632	rho GTPase-activating protein 7-like	1.84213
TRINITY_DN68711_c1_g5_i2	---NA---	PREDICTED: uncharacterized protein LOC109617479	1.83665
TRINITY_DN68854_c2_g3_i2	---NA---	phosphatidylinositol phosphatase PTPRQ-like	1.82925
TRINITY_DN66393_c0_g1_i4	---NA---	solute carrier family 23 member 1-like	1.82545
TRINITY_DN46325_c0_g1_i2	---NA---	uncharacterized protein LOC111120928	1.82246
TRINITY_DN68149_c0_g8_i1	---NA---	uncharacterized protein LOC110463063	1.81497
TRINITY_DN15252_c0_g1_i1	---NA---	SH3 and PX domain-containing protein 2B-like	1.81483
TRINITY_DN67906_c0_g1_i2	K03424	deoxyribonuclease TATDN2	1.81153
TRINITY_DN67482_c2_g1_i4	---NA---	PREDICTED: uncharacterized protein LOC105347437	1.80981
TRINITY_DN39797_c1_g1_i1	K00121	alcohol dehydrogenase class-3	1.80814
TRINITY_DN65244_c1_g8_i1	---NA---	Retrovirus-related Pol polyprotein from transposon	1.80738
TRINITY_DN11065_c0_g1_i1	---NA---	contactin-like	1.80542
TRINITY_DN68954_c1_g19_i3	---NA---	protein turtle homolog A	1.80542
TRINITY_DN16052_c0_g1_i1	---NA---	tctex1 domain-containing protein 1-like	1.80542
TRINITY_DN68014_c0_g1_i1	K16681	protein crumbs-like	1.80537
TRINITY_DN59730_c0_g1_i1	---NA---	putative nuclease HARBI1	1.8027
TRINITY_DN62719_c1_g1_i3	K21124	adapter protein CIKS-like	1.80037
TRINITY_DN28860_c0_g1_i1	K04393	cell division control protein 42 homolog	1.79945
TRINITY_DN67978_c0_g4_i5	---NA---	shell protein-4	1.79532
TRINITY_DN24680_c0_g1_i1	K12310	chitinase-like lectin	1.79332
TRINITY_DN56743_c3_g1_i1	K09289	nuclear receptor coactivator 4-like	1.79317
TRINITY_DN65411_c0_g1_i2	K02183	calmodulin	1.7895
TRINITY_DN79131_c0_g1_i1	---NA---	glycogen [starch] synthase-like	1.78236
TRINITY_DN63877_c0_g1_i2	K05449	vascular endothelial growth factor A	1.78069
TRINITY_DN68491_c2_g1_i1	K10100	F-box only 2-like protein	1.7715
TRINITY_DN41966_c0_g1_i1	---NA---	CCAAT/enhancer-binding protein beta	1.76946
TRINITY_DN69044_c0_g1_i1	---NA---	PREDICTED: uncharacterized protein LOC105319146	1.76913
TRINITY_DN67316_c1_g3_i1	---NA---	nonstructural protein	1.76669
TRINITY_DN56008_c0_g1_i1	K01596	phosphoenolpyruvate carboxykinase, cytosolic [GTP]	1.76018
TRINITY_DN24363_c0_g3_i1	K22584	metalloproteinase inhibitor 3	1.75762
TRINITY_DN57999_c0_g3_i1	K14388	sodium-coupled monocarboxylate transporter 2-like	1.75738
TRINITY_DN66197_c0_g2_i2	K01897	long-chain-fatty-acid--CoA ligase 5-like	1.75612
TRINITY_DN26242_c0_g1_i1	K04721	CD40 ligand	1.75308
TRINITY_DN60806_c0_g3_i1	K16943	septin-2-like	1.7517
TRINITY_DN65305_c0_g2_i1	---NA---	Pleckstrin-like protein domain-containing family A member 7	1.75154
TRINITY_DN66905_c0_g2_i1	K09675	galactose-3-O-sulfotransferase 2	1.75055
TRINITY_DN66627_c0_g4_i3	K09675	Galactose-3-O-sulfotransferase 3	1.74993
TRINITY_DN65128_c2_g7_i1	---NA---	inter-alpha-trypsin inhibitor heavy chain H4	1.74791
TRINITY_DN68087_c147_g6_i3	---NA---	PREDICTED: uncharacterized protein LOC106807441	1.74755
TRINITY_DN103777_c0_g1_i1	---NA---	hypothetical protein CGI_10016230	1.74687
TRINITY_DN65377_c1_g2_i1	---NA---	CIC11C00000005699 [	1.74553
TRINITY_DN66316_c0_g1_i1	---NA---	Cytoplasmic FMR1-interacting protein	1.74508
TRINITY_DN26367_c0_g3_i1	---NA---	hypothetical protein KP79_PYT09996	1.74508
TRINITY_DN78352_c0_g1_i1	---NA---	hypothetical protein LOTGIDRAFT_203715	1.74508
TRINITY_DN52588_c0_g2_i1	---NA---	MAM and LDL-receptor class A domain-containing protein 2-like	1.74508
TRINITY_DN95478_c0_g1_i1	---NA---	pannexin 2	1.74508
TRINITY_DN66104_c0_g1_i1	---NA---	predicted protein	1.74508
TRINITY_DN85979_c0_g1_i1	---NA---	PREDICTED: LOW QUALITY PROTEIN: uncharacterized protein LOC101856069	1.74508
TRINITY_DN65046_c0_g1_i1	---NA---	Kinesin light chain	1.74328
TRINITY_DN68655_c0_g1_i4	K09614	atrial natriuretic peptide-converting enzyme-like	1.73181
TRINITY_DN65603_c3_g1_i2	K17285	selenium binding protein	1.72807
TRINITY_DN56952_c0_g2_i2	---NA---	low-density lipoprotein receptor-related protein 4	1.72376
TRINITY_DN68681_c5_g1_i4	---NA---	interferon-induced protein 44-like	1.72263
TRINITY_DN64298_c0_g1_i1	---NA---	Pleckstrin homology domain-containing family G member 1	1.72156
TRINITY_DN59336_c0_g1_i1	---NA---	sulfate transporter-like	1.72088
TRINITY_DN65792_c1_g1_i1	---NA---	cadherin EGF LAG seven-pass G-type receptor 1	1.7197
TRINITY_DN64584_c0_g2_i1	---NA---	glutathione hydrolase 1 proenzyme-like	1.71467
TRINITY_DN65993_c1_g8_i2	K12026	E3 ubiquitin-protein ligase TRIM56-like	1.71249
TRINITY_DN63055_c0_g3_i1	---NA---	homeobox protein caupolican-like	1.71243
TRINITY_DN44964_c0_g1_i1	---NA---	helicase SKI2W-like	1.70774
TRINITY_DN47326_c0_g1_i1	K12026	tripartite motif-containing protein 2-like	1.7011
TRINITY_DN45838_c0_g1_i1	K03671	2YPM_AChain A, LAFCA THIOREDOXIN 107	1.6976
TRINITY_DN68810_c0_g4_i1	---NA---	uncharacterized protein LOC111113080	1.6971
TRINITY_DN67772_c0_g1_i1	K00288	C-1-tetrahydrofolate synthase, cytoplasmic-like	1.69034
TRINITY_DN68207_c3_g4_i3	---NA---	uncharacterized protein LOC110465758	1.68919
TRINITY_DN57351_c0_g1_i1	K07859	Rho GTPase	1.68826
TRINITY_DN64145_c0_g1_i1	K20226	probable WRKY transcription factor protein 1	1.68773
TRINITY_DN64956_c0_g2_i2	---NA---	hypothetical protein BOW52_08340	1.68616
TRINITY_DN64514_c0_g2_i2	---NA---	PREDICTED: uncharacterized protein LOC105436749	1.68546
TRINITY_DN87325_c0_g1_i1	K00766	anthranilate phosphoribosyltransferase	1.6821
TRINITY_DN10078_c0_g2_i1	---NA---	predicted protein	1.6821
TRINITY_DN18139_c0_g1_i1	---NA---	PREDICTED: uncharacterized protein LOC105317758	1.6821
TRINITY_DN58517_c0_g1_i1	---NA---	uncharacterized protein LOC111134521	1.68042
TRINITY_DN35335_c0_g1_i1	K21918	BTB/POZ domain-containing protein KCTD12-like	1.67903
TRINITY_DN63713_c0_g1_i1	---NA---	sortilin-related receptor-like	1.67436
TRINITY_DN59439_c0_g1_i2	K03255	clustered mitochondria protein homolog	1.67267
TRINITY_DN67512_c0_g3_i4	---NA---	probable ATP-dependent RNA helicase DDX58	1.67122
TRINITY_DN67244_c4_g1_i2	---NA---	inverted formin-2-like	1.67121
TRINITY_DN68182_c1_g4_i1	---NA---	Pseudolysin	1.66913
TRINITY_DN109142_c0_g1_i1	---NA---	uncharacterized protein LOC110440251	1.66781
TRINITY_DN67648_c11_g5_i1	K16738	nuclear distribution protein nudE homolog 1-like	1.66671
TRINITY_DN64599_c0_g1_i1	K05661	ATP-binding cassette sub-family B member 6, mitochondrial-like	1.66606
TRINITY_DN64805_c0_g1_i2	K23727	ceramide synthase 2-like	1.66376
TRINITY_DN66387_c0_g11_i2	K15045	radical S-adenosyl methionine domain-containing protein 2-like	1.66228
TRINITY_DN59439_c0_g2_i2	K03255	clustered mitochondria protein homolog	1.65563
TRINITY_DN62267_c0_g1_i1	---NA---	serine/arginine repetitive matrix protein 1-like	1.6533
TRINITY_DN57866_c0_g1_i1	---NA---	synergin gamma-like	1.65064
TRINITY_DN66286_c1_g1_i4	---NA---	frizzled-2	1.64982
TRINITY_DN29173_c0_g3_i1	---NA---	protein dispatched homolog 3-like	1.64254
TRINITY_DN68514_c0_g1_i2	---NA---	laccase-3	1.63838
TRINITY_DN67824_c2_g2_i10	K15711	Helicase-like transcription factor	1.63766
TRINITY_DN76486_c0_g2_i1	K18123	4-hydroxy-2-oxoglutarate aldolase, mitochondrial	1.637
TRINITY_DN65488_c0_g1_i2	---NA---	uncharacterized protein LOC110463620	1.63378
TRINITY_DN35043_c0_g1_i1	---NA---	hypothetical protein AM593_01381, partial	1.63116
TRINITY_DN68854_c2_g1_i3	---NA---	Tyrosine-protein phosphatase 10D	1.62876
TRINITY_DN27465_c0_g1_i1	---NA---	uncharacterized protein LOC112075409	1.62697
TRINITY_DN66143_c0_g1_i1	---NA---	arrestin domain-containing protein 3-like	1.6259
TRINITY_DN70168_c0_g1_i1	---NA---	low-density lipoprotein receptor-related protein 4-like	1.62457
TRINITY_DN65045_c0_g1_i2	K20631	Rho GTPase-activating protein 6	1.6238
TRINITY_DN62183_c1_g1_i1	---NA---	rho-related GTP-binding protein RhoJ	1.62071
TRINITY_DN67916_c5_g1_i1	K19538	lipoxygenase homology domain-containing protein 1	1.61819
TRINITY_DN56748_c0_g1_i3	---NA---	myosin-3-like	1.61762
TRINITY_DN41314_c0_g1_i1	---NA---	26S proteasome non-ATPase regulatory subunit 8	1.61629
TRINITY_DN87335_c0_g1_i1	---NA---	mucin-2-like	1.61629
TRINITY_DN112248_c0_g1_i1	---NA---	neuronal acetylcholine receptor subunit alpha-10-like	1.61629
TRINITY_DN45909_c0_g2_i2	---NA---	Protocadherin Fat 4	1.61629
TRINITY_DN73736_c0_g1_i1	---NA---	Transposon TX1 uncharacterized 149 kDa protein	1.61629
TRINITY_DN61823_c0_g1_i1	---NA---	predicted protein	1.61544
TRINITY_DN68501_c1_g1_i3	K07819	beta-1,3-galactosyltransferase 1-like	1.61058
TRINITY_DN41022_c1_g5_i1	---NA---	round spermatid basic protein 1-like	1.60978
TRINITY_DN67064_c0_g1_i1	K15261	Poly [ADP-ribose] polymerase 15	1.60833
TRINITY_DN66400_c1_g3_i3	---NA---	uncharacterized protein LOC112568058	1.59875
TRINITY_DN55419_c1_g2_i1	---NA---	heat shock 70 kDa protein 12A-like	1.59612
TRINITY_DN67170_c0_g1_i1	---NA---	TPR and ankyrin repeat-containing protein 1-like	1.59388
TRINITY_DN67106_c8_g5_i7	K11140	aminopeptidase N-like	1.58662
TRINITY_DN56460_c0_g1_i1	---NA---	neuronal acetylcholine receptor subunit beta-3-like	1.5857
TRINITY_DN37963_c0_g1_i1	---NA---	PR domain zinc finger protein 1-like	1.58302
TRINITY_DN65178_c7_g3_i1	---NA---	Protein flp	1.5757
TRINITY_DN68475_c0_g2_i12	---NA---	Nuclear GTPase SLIP-GC	1.57567
TRINITY_DN68061_c0_g1_i2	K01365	cathepsin L	1.57546
TRINITY_DN62929_c0_g1_i3	K00738	alpha-1,3-mannosyl-glycoprotein 4-beta-N-acetylglucosaminyltransferase B-like	1.57063
TRINITY_DN39747_c0_g1_i1	---NA---	uncharacterized protein LOC111135744	1.57003
TRINITY_DN62269_c0_g1_i3	---NA---	glycosyltransferase 1 domain-containing protein 1-like	1.56879
TRINITY_DN17444_c0_g1_i1	---NA---	sulfotransferase-like protein	1.56879
TRINITY_DN60761_c0_g1_i2	K10649	E3 ubiquitin-protein ligase TRIM9-like	1.56878
TRINITY_DN68119_c3_g2_i1	K00029	NADP-dependent malic enzyme-like	1.56874
TRINITY_DN64529_c1_g1_i3	K10359	myosin-VIIa	1.56548
TRINITY_DN68012_c0_g1_i3	---NA---	E3 ubiquitin-protein ligase TRIM56	1.56424
TRINITY_DN66925_c2_g5_i1	---NA---	hypothetical protein HIM_12195	1.56198
TRINITY_DN67234_c5_g10_i1	---NA---	angiopoietin-related protein 6-like	1.56037
TRINITY_DN51562_c0_g1_i1	K07525	uncharacterized protein LOC111137825	1.55912
TRINITY_DN14956_c0_g2_i1	---NA---	A disintegrin and metalloproteinase with thrombospondin motifs 5	1.54739
TRINITY_DN95741_c0_g1_i1	K01652	biosynthetic-type acetolactate synthase large subunit	1.54739
TRINITY_DN19771_c0_g2_i1	---NA---	hypothetical protein BRAFLDRAFT_72537	1.54739
TRINITY_DN114872_c0_g1_i1	---NA---	opine dehydrogenase-like	1.54739
TRINITY_DN70019_c0_g1_i1	K00927	phosphoglycerate kinase	1.54739
TRINITY_DN33065_c0_g1_i1	---NA---	RNA-directed DNA polymerase from mobile element jockey-like	1.54739
TRINITY_DN66950_c0_g1_i2	K15168	serine/threonine-protein kinase pats1	1.54614
TRINITY_DN67155_c2_g1_i9	---NA---	protein NETWORKED 1D-like	1.54437
TRINITY_DN68336_c5_g9_i1	---NA---	PREDICTED: uncharacterized protein LOC105327838	1.54124
TRINITY_DN66771_c0_g3_i1	---NA---	hypothetical protein parPi_0011742	1.54036
TRINITY_DN67825_c2_g2_i4	---NA---	XK-related protein 4-like	1.5389
TRINITY_DN63584_c0_g3_i3	---NA---	pikachurin-like	1.5364
TRINITY_DN67064_c0_g2_i2	K15261	Poly [ADP-ribose] polymerase 15	1.53481
TRINITY_DN36006_c0_g1_i1	K20402	DEP domain-containing mTOR-interacting protein-like	1.5339
TRINITY_DN66152_c0_g7_i1	---NA---	Antho-RFamide neuropeptides type	1.53062
TRINITY_DN57138_c0_g1_i1	---NA---	PREDICTED: uncharacterized protein LOC101860234	1.52985
TRINITY_DN75902_c0_g1_i1	---NA---	ABCB/p-glycoprotein-like protein	1.52942
TRINITY_DN66104_c0_g2_i1	---NA---	Nuclear transcription factor Y subunit alpha	1.52437
TRINITY_DN68896_c4_g22_i1	---NA---	hypothetical protein BSL78_29151	1.52126
TRINITY_DN65650_c0_g1_i1	---NA---	uncharacterized protein LOC111118219	1.52067
TRINITY_DN52600_c1_g1_i1	K05110	ephrin type-B receptor 1-B-like	1.52065
TRINITY_DN64831_c0_g3_i1	K09209	Krueppel-like factor 10	1.51842
TRINITY_DN67635_c3_g2_i2	K10359	myosin-VIIa-like	1.51613
TRINITY_DN68954_c1_g2_i1	---NA---	synaptogenesis protein syg-2-like	1.51596
TRINITY_DN8157_c0_g1_i1	K06278	Caveolin-1	1.50926
TRINITY_DN61243_c0_g1_i1	---NA---	solute carrier family 43 member 3-like	1.50767
TRINITY_DN67745_c0_g2_i1	---NA---	HEAT repeat-containing protein 6-like	1.50649
TRINITY_DN61379_c1_g1_i1	---NA---	PREDICTED: uncharacterized protein LOC109620816	1.50632
TRINITY_DN65531_c4_g1_i1	K00615	transketolase-like	1.50579
TRINITY_DN55097_c0_g1_i2	---NA---	uncharacterized protein LOC110459553	1.50454
TRINITY_DN65969_c7_g3_i1	---NA---	SPARC-related modular calcium-binding protein 2-like	1.50363
TRINITY_DN45817_c0_g2_i1	---NA---	carbonic anhydrase	1.50309
TRINITY_DN63377_c1_g1_i2	---NA---	uncharacterized protein LOC112564180	1.50076
TRINITY_DN58953_c0_g1_i1	K09884	aquaporin AQPAn	1.49679
TRINITY_DN66435_c1_g3_i2	---NA---	hypothetical protein LOTGIDRAFT_176355	1.49639
TRINITY_DN48394_c0_g1_i1	---NA---	tyrosine-protein kinase Fer-like	1.4929
TRINITY_DN68273_c0_g2_i5	---NA---	hypothetical protein LOTGIDRAFT_236277	1.48683
TRINITY_DN33985_c0_g1_i1	---NA---	Arginine-glutamic acid dipeptide repeats protein	1.4856
TRINITY_DN68727_c2_g6_i1	---NA---	macrophage mannose receptor 1-like	1.48241
TRINITY_DN68367_c0_g1_i2	K13912	deleted in malignant brain tumors 1 protein	1.48212
TRINITY_DN85369_c0_g1_i1	---NA---	insulinoma-associated protein 1	1.48168
TRINITY_DN67546_c6_g19_i1	K00452	3-hydroxyanthranilate 3,4-dioxygenase	1.48148
TRINITY_DN68138_c1_g2_i3	---NA---	NC domain protein	1.47591
TRINITY_DN68736_c1_g9_i7	---NA---	uncharacterized protein LOC106160983	1.4754
TRINITY_DN71200_c0_g1_i1	---NA---	endoplasmic reticulum chaperone BiP-like	1.47504
TRINITY_DN84609_c0_g1_i1	---NA---	F-box/LRR-repeat protein 15-like	1.47504
TRINITY_DN103543_c0_g1_i1	---NA---	lethal(3)malignant brain tumor-like protein 3	1.47504
TRINITY_DN68428_c3_g3_i1	---NA---	Neurabin-1	1.47504
TRINITY_DN4477_c0_g1_i1	---NA---	Protein APCDD1	1.47504
TRINITY_DN94990_c0_g1_i1	---NA---	receptor tyrosine-protein kinase erbB-4-like	1.47504
TRINITY_DN63588_c0_g1_i1	---NA---	cytochrome P450 4F8-like	1.47326
TRINITY_DN67241_c4_g2_i11	K21411	Ankyrin repeat and LEM domain-containing protein 1	1.47104
TRINITY_DN68347_c0_g4_i1	---NA---	Ariadne-like RING finger protein R811	1.47052
TRINITY_DN65817_c0_g3_i1	---NA---	transmembrane protein C17orf113-like	1.46586
TRINITY_DN60506_c0_g1_i1	---NA---	hypothetical protein XELAEV_18021676mg	1.46292
TRINITY_DN54997_c0_g1_i1	---NA---	cactin-like	1.46075
TRINITY_DN68999_c8_g3_i2	---NA---	uncharacterized protein F54H12	1.4592
TRINITY_DN23863_c0_g1_i1	---NA---	Periaxin	1.45707
TRINITY_DN697_c0_g1_i1	---NA---	FMRFamide receptor-like	1.45636
TRINITY_DN68371_c0_g8_i1	---NA---	trichohyalin-like	1.45619
TRINITY_DN41310_c0_g1_i1	K04448	activator protein 1	1.45462
TRINITY_DN67092_c1_g1_i1	---NA---	hypothetical protein LOTGIDRAFT_231464	1.4454
TRINITY_DN59134_c0_g1_i1	---NA---	uncharacterized protein LOC110465859	1.44254
TRINITY_DN45231_c0_g1_i2	K15264	probable 28S rRNA (cytosine-C(5))-methyltransferase	1.44237
TRINITY_DN63372_c0_g2_i1	K06624	cyclin-dependent kinase inhibitor 1B	1.44067
TRINITY_DN66141_c0_g2_i1	K00710	polypeptide N-acetylgalactosaminyltransferase 13-like	1.43791
TRINITY_DN65888_c0_g3_i1	---NA---	cysteine sulfinic acid decarboxylase	1.43691
TRINITY_DN2288_c0_g1_i1	---NA---	putative neural-cadherin 2	1.43691
TRINITY_DN53155_c0_g2_i1	---NA---	uncharacterized protein LOC111118980	1.43574
TRINITY_DN61488_c0_g1_i1	---NA---	PREDICTED: uncharacterized protein LOC105331156	1.43553
TRINITY_DN56094_c0_g1_i2	---NA---	unnamed protein product, partial	1.43215
TRINITY_DN76087_c0_g1_i1	K01102	pyruvate dehydrogenase [acetyl-transferring]-phosphatase 1, mitochondrial-like	1.43126
TRINITY_DN30753_c0_g1_i1	---NA---	4-aminobutyrate aminotransferase, mitochondrial	1.42929
TRINITY_DN118304_c0_g1_i1	---NA---	hypothetical protein CGI_10002432	1.42929
TRINITY_DN12442_c0_g1_i1	---NA---	mediator of RNA polymerase II transcription subunit 15-like	1.42783
TRINITY_DN854_c0_g2_i1	---NA---	hypothetical protein LOTGIDRAFT_153557	1.42308
TRINITY_DN68549_c0_g1_i1	K14521	RNA cytidine acetyltransferase-like	1.42282
TRINITY_DN41083_c0_g1_i1	K09104	helix-loop-helix protein delilah-like	1.42078
TRINITY_DN67110_c0_g1_i1	K13411	dual oxidase 2-like	1.41016
TRINITY_DN66267_c1_g3_i8	---NA---	alanine racemase, catabolic-like	1.40877
TRINITY_DN55037_c0_g1_i2	K01251	S-adenosylhomocysteine hydrolase-like protein 1	1.40208
TRINITY_DN87802_c0_g1_i1	K08801	PAS domain-containing serine/threonine-protein kinase	1.40121
TRINITY_DN65929_c0_g2_i2	---NA---	laccase-2	1.39943
TRINITY_DN116229_c0_g1_i1	K01703	3-isopropylmalate dehydratase large subunit	1.39892
TRINITY_DN106090_c0_g1_i1	---NA---	ADP-forming succinate--CoA ligase subunit beta	1.39892
TRINITY_DN33334_c0_g2_i1	---NA---	calmodulin-like protein	1.39892
TRINITY_DN63885_c0_g1_i1	---NA---	E3 ubiquitin-protein ligase rnf213-alpha-like	1.39892
TRINITY_DN15009_c0_g1_i1	---NA---	EF-hand protein	1.39892
TRINITY_DN112863_c0_g1_i1	---NA---	ependymin-related protein 1-like	1.39892
TRINITY_DN42260_c0_g2_i1	---NA---	hypothetical protein LOTGIDRAFT_159302	1.39892
TRINITY_DN96521_c0_g1_i1	---NA---	putative interleukin 17-like protein	1.39892
TRINITY_DN15012_c0_g1_i1	---NA---	Sodium-driven chloride bicarbonate exchanger	1.39892
TRINITY_DN1878_c0_g1_i1	---NA---	uncharacterized protein LOC106162363	1.39892
TRINITY_DN103920_c0_g1_i1	---NA---	uncharacterized protein LOC110455747	1.39892
TRINITY_DN66777_c2_g1_i3	---NA---	uncharacterized protein LOC110460606	1.39764
TRINITY_DN67797_c1_g2_i1	---NA---	zinc finger BED domain-containing protein 1-like	1.39676
TRINITY_DN68221_c0_g1_i1	---NA---	hypothetical protein CAPTEDRAFT_130267, partial	1.39434
TRINITY_DN118332_c0_g1_i1	---NA---	tubulin alpha-1 chain	1.39428
TRINITY_DN63631_c0_g2_i1	---NA---	proprotein convertase subtilisin/kexin type 5-like	1.39216
TRINITY_DN65582_c2_g1_i1	K15377	choline transporter-like protein 2	1.38866
TRINITY_DN61872_c0_g1_i1	---NA---	uncharacterized protein LOC110454323	1.38423
TRINITY_DN25092_c0_g1_i3	---NA---	hypothetical protein EGW08_010715	1.38394
TRINITY_DN94794_c0_g1_i1	K05038	sodium- and chloride-dependent glycine transporter 1	1.3832
TRINITY_DN68670_c0_g4_i1	---NA---	serine/threonine-protein kinase pats1	1.38305
TRINITY_DN66503_c0_g3_i1	K20641	rho GTPase-activating protein 20-like	1.38229
TRINITY_DN104663_c0_g1_i1	---NA---	PREDICTED: uncharacterized protein LOC105344174	1.3801
TRINITY_DN68491_c3_g4_i1	K11536	solute carrier family 28 member 3-like	1.37924
TRINITY_DN59443_c0_g1_i1	K13912	Deleted in malignant brain tumors 1 protein	1.37703
TRINITY_DN65766_c5_g3_i2	---NA---	tumor necrosis factor	1.37703
TRINITY_DN67111_c0_g6_i7	K20072	switch-associated protein 70	1.37445
TRINITY_DN68126_c4_g1_i2	---NA---	hypothetical protein WN51_10180	1.37417
TRINITY_DN68964_c8_g3_i1	---NA---	von Willebrand factor D and EGF domain-containing protein-like	1.37311
TRINITY_DN52649_c0_g1_i1	K23581	transcription factor SOXC	1.37301
TRINITY_DN63631_c0_g1_i1	---NA---	proprotein convertase subtilisin/kexin type 5-like	1.36894
TRINITY_DN64216_c4_g2_i14	K17277	epidermal growth factor receptor kinase substrate 8-like	1.36698
TRINITY_DN15463_c0_g1_i1	---NA---	Connector enhancer of kinase suppressor of ras 1	1.36619
TRINITY_DN68670_c0_g8_i1	---NA---	Mediator of RNA polymerase II transcription subunit 25	1.36507
TRINITY_DN66562_c0_g1_i6	---NA---	Retrovirus-related Pol polyprotein from transposon	1.36458
TRINITY_DN67271_c1_g2_i9	K14845	decapping and exoribonuclease protein	1.36281
TRINITY_DN66502_c3_g1_i3	---NA---	SPRY domain-containing protein 3-like	1.3609
TRINITY_DN67858_c0_g2_i4	---NA---	UNC5C-like protein	1.35996
TRINITY_DN57519_c0_g1_i1	K01369	legumain-like	1.35705
TRINITY_DN56336_c0_g1_i1	---NA---	uncharacterized protein LOC111126187	1.35702
TRINITY_DN68766_c2_g3_i1	---NA---	interferon-inducible GTPase 5-like	1.35669
TRINITY_DN68056_c2_g3_i1	---NA---	putative monocarboxylate transporter 10	1.35659
TRINITY_DN62547_c1_g1_i1	K05705	tyrosine-protein kinase SRK2	1.35618
TRINITY_DN41639_c0_g1_i2	---NA---	uncharacterized protein LOC111123069	1.3546
TRINITY_DN61823_c0_g4_i2	---NA---	proline-rich transmembrane protein 4-like	1.3493
TRINITY_DN67203_c1_g1_i1	---NA---	uncharacterized protein LOC110454547	1.34885
TRINITY_DN60020_c0_g1_i2	---NA---	probable low affinity copper uptake protein 2	1.34757
TRINITY_DN60287_c0_g1_i2	K00760	hypoxanthine-guanine phosphoribosyltransferase	1.34629
TRINITY_DN103474_c0_g1_i1	K13298	XP_022315235.1dual 3',5'-cyclic-AMP and GMP phosphodiesterase 11-like	1.34591
TRINITY_DN54661_c0_g1_i1	K08533	nuclear receptor subfamily 1 group D member 2-like	1.34025
TRINITY_DN65185_c1_g4_i1	---NA---	Jerky protein homolog-like	1.33929
TRINITY_DN12095_c0_g2_i1	K06268	neurocalcin-delta	1.33844
TRINITY_DN34802_c0_g1_i1	---NA---	hypothetical protein LOTGIDRAFT_132049, partial	1.33834
TRINITY_DN65165_c0_g1_i2	K05768	gelsolin-like protein 2	1.3383
TRINITY_DN5408_c0_g1_i1	---NA---	protein rolling stone	1.33714
TRINITY_DN57986_c0_g1_i2	---NA---	non-classical arabinogalactan protein 31-like	1.33349
TRINITY_DN53243_c0_g2_i1	---NA---	PREDICTED: uncharacterized protein LOC109619442	1.33246
TRINITY_DN68883_c3_g8_i5	---NA---	uncharacterized protein LOC111131279	1.33176
TRINITY_DN17250_c0_g1_i1	---NA---	uncharacterized protein LOC111103638	1.33128
TRINITY_DN36755_c0_g1_i1	K17102	ETS-related transcription factor Elf-5	1.32481
TRINITY_DN59419_c0_g1_i1	K02678	protein c-ets-1-B-like	1.32481
TRINITY_DN67565_c1_g2_i2	K10362	Unconventional myosin-XVIIIa	1.31946
TRINITY_DN34833_c0_g1_i1	K13780	large neutral amino acids transporter small subunit 1-like	1.31914
TRINITY_DN61598_c1_g1_i1	---NA---	uncharacterized protein LOC111133183	1.31914
TRINITY_DN69398_c0_g1_i1	---NA---	adenylyl-sulfate reductase subunit alpha	1.31861
TRINITY_DN103632_c0_g1_i1	---NA---	cytochrome P450 1A1-like	1.31861
TRINITY_DN2602_c0_g1_i1	---NA---	dissimilatory-type sulfite reductase subunit alpha	1.31861
TRINITY_DN21090_c0_g1_i1	K05206	Glutamate receptor ionotropic, delta-1	1.31861
TRINITY_DN115296_c0_g1_i1	---NA---	ionotropic receptor 25a-like	1.31861
TRINITY_DN35735_c0_g1_i1	---NA---	leucine-, glutamate- and lysine-rich protein 1-like	1.31861
TRINITY_DN14633_c0_g1_i1	---NA---	molecular chaperone HtpG	1.31861
TRINITY_DN44370_c0_g5_i1	---NA---	Nuclear receptor ROR-alpha	1.31861
TRINITY_DN65217_c1_g3_i1	K01875	serine--tRNA ligase, mitochondrial	1.31861
TRINITY_DN90760_c0_g1_i1	---NA---	solute carrier family 23 member 1	1.31861
TRINITY_DN18138_c0_g2_i1	---NA---	testicular haploid expressed gene protein-like	1.31861
TRINITY_DN37390_c0_g1_i1	K00102	probable D-lactate dehydrogenase, mitochondrial	1.31629
TRINITY_DN56902_c0_g1_i1	---NA---	predicted protein	1.31463
TRINITY_DN67639_c4_g1_i3	K09831	Cytochrome P450 4F6	1.31034
TRINITY_DN65838_c0_g1_i1	---NA---	Ankyrin repeat domain-containing protein	1.30978
TRINITY_DN95196_c0_g1_i1	---NA---	fructose-bisphosphate aldolase-like	1.30366
TRINITY_DN66507_c0_g8_i1	---NA---	uncharacterized protein LOC110459994	1.30301
TRINITY_DN38389_c0_g2_i1	---NA---	hypothetical protein BOW52_11065	1.30153
TRINITY_DN68087_c147_g7_i1	---NA---	PREDICTED: uncharacterized protein LOC105327838	1.30077
TRINITY_DN51345_c0_g1_i1	---NA---	unconventional myosin-XV	1.29786
TRINITY_DN60796_c0_g2_i1	K20778	LOC446940 protein	1.29781
TRINITY_DN51107_c0_g2_i1	K13513	lysocardiolipin acyltransferase 1	1.29774
TRINITY_DN68560_c1_g2_i6	---NA---	uncharacterized protein LOC110457925	1.29623
TRINITY_DN65211_c0_g2_i3	---NA---	VWFA and cache domain-containing protein 1-like	1.29538
TRINITY_DN68069_c2_g1_i1	K09429	ETS homologous factor-like	1.29247
TRINITY_DN67234_c5_g5_i1	---NA---	angiopoietin-2	1.29066
TRINITY_DN66291_c1_g1_i1	---NA---	three-prime repair exonuclease 1	1.28944
TRINITY_DN64514_c0_g1_i2	---NA---	uncharacterized protein LOC111847890	1.2888
TRINITY_DN68430_c2_g1_i3	K23612	neural Wiskott-Aldrich syndrome protein	1.28552
TRINITY_DN26749_c0_g2_i1	K23379	Extracellular matrix protein FRAS1	1.28493
TRINITY_DN68677_c1_g1_i2	---NA---	Brain-specific angiogenesis inhibitor 3	1.28457
TRINITY_DN60074_c1_g2_i3	K15116	solute carrier family 25 member 36-like	1.28451
TRINITY_DN68996_c4_g1_i1	---NA---	PREDICTED: uncharacterized protein LOC106069146	1.2842
TRINITY_DN44946_c0_g2_i1	K06051	protein jagged-1-like	1.28322
TRINITY_DN68999_c7_g3_i2	---NA---	cellular nucleic acid-binding protein-like	1.28114
TRINITY_DN65958_c0_g2_i2	K00799	glutathione S-transferase	1.28034
TRINITY_DN50200_c0_g1_i1	K19329	WW domain-containing oxidoreductase-like	1.28005
TRINITY_DN68467_c3_g2_i1	---NA---	Ribonucleoside-diphosphate reductase small chain	1.27697
TRINITY_DN66316_c0_g3_i1	---NA---	cytoplasmic FMR1-interacting protein 1-like	1.2756
TRINITY_DN60657_c0_g2_i2	K23012	Peroxisomal leader peptide-processing protease	1.27311
TRINITY_DN66741_c0_g1_i5	K08017	villin-1	1.27282
TRINITY_DN68393_c3_g3_i3	---NA---	RNA-directed DNA polymerase from mobile element jockey	1.27226
TRINITY_DN66914_c1_g8_i2	---NA---	hypothetical protein BBROOKSOX_564	1.2708
TRINITY_DN64340_c0_g1_i1	---NA---	pol-like protein	1.26916
TRINITY_DN65012_c2_g4_i3	---NA---	brain protein I3-like	1.26899
TRINITY_DN67076_c2_g12_i3	---NA---	leucine-rich repeat and calponin homology domain-containing protein 2-like	1.26878
TRINITY_DN63831_c0_g3_i1	K07119	prostaglandin reductase-3	1.26859
TRINITY_DN56553_c0_g1_i1	---NA---	VDR/PXR/CAR-like nuclear receptor	1.26774
TRINITY_DN54276_c0_g1_i1	K01745	histidine ammonia-lyase-like	1.26742
TRINITY_DN68877_c3_g3_i2	---NA---	proline-rich transmembrane protein 1-like	1.26443
TRINITY_DN61110_c0_g1_i1	K04409	Serine/threonine-protein kinase PAK 1	1.26277
TRINITY_DN67218_c2_g1_i1	K00698	Myosin-IIIb	1.26221
TRINITY_DN64270_c0_g1_i1	---NA---	heat shock 70 kDa protein 12A-like	1.26107
TRINITY_DN55653_c0_g1_i1	---NA---	hexose transporter (HT)	1.26026
TRINITY_DN59799_c1_g1_i2	K20405	GATOR complex protein NPRL2	1.25314
TRINITY_DN49721_c0_g1_i2	K01446	peptidoglycan recognition protein 1	1.25314
TRINITY_DN64538_c0_g2_i1	K19511	Peroxidase-like protein	1.25231
TRINITY_DN68159_c2_g1_i1	---NA---	putative defense protein	1.25023
TRINITY_DN105816_c0_g2_i1	K04078	10 kDa heat shock protein, mitochondrial-like	1.24989
TRINITY_DN63343_c0_g1_i1	---NA---	hypothetical protein LOTGIDRAFT_160535	1.24893
TRINITY_DN67170_c0_g3_i1	---NA---	TPR and ankyrin repeat-containing protein 1	1.24537
TRINITY_DN95906_c0_g1_i1	K01044	acetylcholinesterase	1.24529
TRINITY_DN10166_c0_g1_i1	---NA---	PREDICTED: uncharacterized protein LOC105440841	1.24529
TRINITY_DN59599_c0_g1_i1	---NA---	Si:dkey-56d12	1.23879
TRINITY_DN42551_c0_g1_i1	---NA---	hypothetical protein CGI_10009205	1.2354
TRINITY_DN63086_c0_g1_i1	K00121	alcohol dehydrogenase class-3-like	1.23512
TRINITY_DN64281_c0_g1_i1	K10028	macrophage migration inhibitory factor 2	1.23509
TRINITY_DN37281_c0_g1_i1	---NA---	PREDICTED: uncharacterized protein LOC105342521	1.2347
TRINITY_DN106711_c0_g1_i1	---NA---	b(0,+)-type amino acid transporter 1-like	1.23363
TRINITY_DN59890_c1_g1_i1	---NA---	Oxidoreductase NAD-binding domain-containing protein 1	1.23363
TRINITY_DN24957_c0_g1_i1	---NA---	protein dispatched	1.23363
TRINITY_DN946_c0_g1_i1	---NA---	serine--tRNA synthetase-like protein Slimp	1.23363
TRINITY_DN73987_c0_g1_i1	---NA---	Tripartite motif-containing protein 3	1.23363
TRINITY_DN103428_c0_g1_i1	---NA---	zinc finger MYM-type protein 1-like	1.23363
TRINITY_DN61449_c2_g4_i1	K04397	caspase 8	1.23342
TRINITY_DN65838_c0_g2_i1	---NA---	ankycorbin-like	1.23087
TRINITY_DN68159_c3_g8_i1	---NA---	hypothetical protein BSL78_23886	1.23001
TRINITY_DN31353_c0_g1_i1	K15117	solute carrier family 25 member 35-like	1.22896
TRINITY_DN68430_c2_g4_i3	---NA---	Wiskott-Aldrich syndrome protein	1.22028
TRINITY_DN52578_c0_g1_i1	---NA---	hypothetical protein	1.21976
TRINITY_DN64308_c0_g1_i2	---NA---	PREDICTED: uncharacterized protein LOC105342545	1.219
TRINITY_DN1433_c0_g1_i1	---NA---	enoyl-CoA delta isomerase 3-like	1.21726
TRINITY_DN28154_c0_g1_i1	K06134	5-demethoxyubiquinone hydroxylase, mitochondrial-like	1.21322
TRINITY_DN68333_c3_g5_i1	K17072	interferon-inducible GTPase 5-like	1.211
TRINITY_DN59861_c0_g6_i2	---NA---	PREDICTED: uncharacterized protein LOC105322314	1.20945
TRINITY_DN62306_c0_g1_i1	K12383	ganglioside GM2 activator-like	1.2091
TRINITY_DN53253_c0_g2_i1	K05456	pro-neuregulin-2, membrane-bound	1.2091
TRINITY_DN53253_c0_g1_i3	---NA---	pro-neuregulin-1, membrane-bound	1.2082
TRINITY_DN26630_c0_g1_i1	---NA---	excitatory amino acid transporter 1	1.20808
TRINITY_DN56344_c0_g2_i3	---NA---	nephrin	1.20758
TRINITY_DN68990_c16_g11_i1	---NA---	transcription intermediary factor 1-beta-like	1.20195
TRINITY_DN105751_c1_g1_i1	---NA---	N-acetylated-alpha-linked acidic dipeptidase 2-like	1.20061
TRINITY_DN51582_c0_g1_i2	K00228	coproporphyrinogen-III oxidase	1.20019
TRINITY_DN68821_c1_g1_i1	K12373	N,N'-diacetylchitobiase	1.19947
TRINITY_DN52742_c0_g1_i1	---NA---	zonadhesin-like	1.19796
TRINITY_DN68954_c1_g18_i2	---NA---	kin of IRRE like precursor	1.19789
TRINITY_DN65727_c1_g1_i1	---NA---	caspase 9	1.1976
TRINITY_DN51514_c0_g1_i1	---NA---	EGF-like domain-containing protein	1.19694
TRINITY_DN4383_c0_g1_i1	---NA---	enterin neuropeptides-like	1.19694
TRINITY_DN66162_c26_g1_i2	K08187	monocarboxylate transporter 10-like	1.19501
TRINITY_DN62830_c0_g1_i1	K09228	uncharacterized protein LOC110449447	1.19336
TRINITY_DN65366_c3_g1_i2	---NA---	predicted protein	1.19304
TRINITY_DN29559_c0_g1_i1	K01056	probable peptidyl-tRNA hydrolase-like	1.1877
TRINITY_DN65150_c0_g1_i1	---NA---	uncharacterized protein K02A2	1.18602
TRINITY_DN57402_c0_g1_i2	---NA---	hypothetical protein EGW08_000752	1.1855
TRINITY_DN68586_c2_g1_i8	---NA---	Nuclear GTPase SLIP-GC	1.18211
TRINITY_DN61107_c0_g1_i1	K04729	myeloid differentiation factor 88	1.18137
TRINITY_DN55833_c0_g1_i1	---NA---	uncharacterized protein LOC110462820	1.17969
TRINITY_DN60588_c0_g1_i1	---NA---	uncharacterized protein LOC110446774	1.17854
TRINITY_DN65219_c3_g1_i1	---NA---	uncharacterized protein LOC110454562	1.17465
TRINITY_DN39152_c0_g4_i3	---NA---	cold-shock protein CS120-like	1.1725
TRINITY_DN65314_c0_g1_i5	K06766	neogenin-like	1.17229
TRINITY_DN6700_c0_g1_i1	K02183	Calmodulin-like protein 12	1.1719
TRINITY_DN57361_c0_g2_i2	---NA---	hypothetical protein	1.17097
TRINITY_DN33036_c0_g1_i1	---NA---	solute carrier organic anion transporter family member 3A1-like	1.17097
TRINITY_DN26376_c0_g1_i1	---NA---	kinesin-like protein KIF26B	1.17
TRINITY_DN37169_c0_g2_i1	---NA---	Tripartite motif-containing protein 45	1.17
TRINITY_DN70565_c0_g1_i1	---NA---	uncharacterized methyltransferase-like C25B8	1.16957
TRINITY_DN66444_c2_g4_i1	K23284	Cerebellin-3	1.16952
TRINITY_DN6721_c0_g1_i1	---NA---	phenazine biosynthesis-like domain-containing protein	1.16838
TRINITY_DN68745_c0_g1_i1	---NA---	uncharacterized protein LOC112575321	1.16768
TRINITY_DN68300_c2_g3_i3	K17592	sacsin-like	1.16279
TRINITY_DN50142_c0_g1_i1	K23518	O-acetyl-ADP-ribose deacetylase MACROD2	1.16272
TRINITY_DN59662_c0_g1_i1	K15043	Importin subunit alpha-1	1.15795
TRINITY_DN68333_c2_g4_i1	K03016	DNA-directed RNA polymerases I, II, and III subunit RPABC3-like	1.15714
TRINITY_DN62755_c0_g3_i1	---NA---	FMRFamide receptor-like	1.1563
TRINITY_DN65833_c0_g1_i1	---NA---	hypothetical protein CB1_000385020	1.15304
TRINITY_DN66567_c1_g5_i3	K12887	myelin expression factor 2-like	1.15286
TRINITY_DN52678_c0_g1_i1	K17353	tetraspanin-18-like	1.15248
TRINITY_DN67382_c0_g5_i2	---NA---	PREDICTED: uncharacterized protein LOC106706917	1.15081
TRINITY_DN54302_c0_g1_i1	K10402	kinesin-like protein KIF20B	1.15002
TRINITY_DN64965_c0_g4_i1	---NA---	hypothetical protein LOTGIDRAFT_239746	1.14966
TRINITY_DN68598_c1_g5_i1	---NA---	NACHT and WD repeat domain-containing protein 2-like	1.14948
TRINITY_DN68598_c1_g3_i2	---NA---	NACHT and WD repeat domain-containing protein 1	1.14631
TRINITY_DN48443_c0_g1_i1	---NA---	leucine-rich repeat-containing protein 24-like	1.14489
TRINITY_DN10289_c0_g1_i1	K03671	thioredoxin	1.14453
TRINITY_DN33000_c0_g1_i1	K20230	leucine-rich repeat-containing protein 24-like	1.14421
TRINITY_DN3421_c0_g2_i1	---NA---	5'-nucleotidase	1.14342
TRINITY_DN103033_c0_g1_i1	---NA---	acyl-CoA synthetase family member 2, mitochondrial-like	1.14342
TRINITY_DN96716_c0_g1_i1	---NA---	ankyrin repeat protein	1.14342
TRINITY_DN4802_c0_g1_i1	K00548	methionine synthase-like	1.14342
TRINITY_DN5645_c0_g1_i1	---NA---	microtubule-associated serine/threonine-protein kinase 3-like	1.14342
TRINITY_DN106851_c0_g1_i1	---NA---	Monocarboxylate transporter 12	1.14342
TRINITY_DN1570_c0_g1_i1	---NA---	PREDICTED: uncharacterized protein LOC102810040	1.14342
TRINITY_DN88277_c0_g1_i1	---NA---	PREDICTED: uncharacterized protein LOC105345099	1.14342
TRINITY_DN96564_c0_g1_i1	---NA---	PREDICTED: uncharacterized protein LOC106807252	1.14342
TRINITY_DN18104_c0_g2_i1	K12352	sphingomyelin phosphodiesterase 3-like	1.14342
TRINITY_DN66755_c3_g4_i1	---NA---	uncharacterized protein LOC111104431	1.14342
TRINITY_DN17284_c0_g1_i1	---NA---	uncharacterized protein LOC111104628	1.14342
TRINITY_DN63152_c0_g1_i1	---NA---	MORN repeat-containing 4	1.14313
TRINITY_DN60228_c0_g2_i1	K08532	vitamin D3 receptor-like	1.14264
TRINITY_DN68648_c0_g5_i6	---NA---	interferon-induced protein 44-like	1.1413
TRINITY_DN65366_c3_g2_i3	---NA---	PREDICTED: uncharacterized protein LOC106056777	1.1405
TRINITY_DN61432_c2_g1_i3	K01769	soluble guanylate cyclase 88E	1.13776
TRINITY_DN68149_c0_g7_i1	---NA---	hemicentin-2-like	1.1374
TRINITY_DN52603_c0_g1_i2	---NA---	box C/D snoRNA protein 1-like	1.13476
TRINITY_DN68544_c0_g3_i3	---NA---	uncharacterized protein LOC106175530	1.13476
TRINITY_DN33856_c0_g2_i2	---NA---	zinc finger protein squeeze-like	1.13396
TRINITY_DN62856_c0_g2_i2	K05410	serine/threonine-protein kinase TBK1-like	1.132
TRINITY_DN50390_c0_g1_i1	---NA---	pleckstrin homology domain-containing family A member 7	1.13147
TRINITY_DN37950_c1_g1_i1	---NA---	pre-mRNA-splicing factor CWC22 homolog	1.13093
TRINITY_DN61762_c0_g2_i1	K17478	FK506-binding protein 15-like	1.12924
TRINITY_DN68424_c2_g6_i1	---NA---	fucolectin-related molecule	1.12905
TRINITY_DN33153_c0_g1_i1	---NA---	insulinoma-associated protein 1a-like	1.12905
TRINITY_DN30881_c0_g2_i1	---NA---	myb-like protein A	1.12815
TRINITY_DN12967_c0_g1_i1	---NA---	ceramide-1-phosphate transfer protein-like	1.12746
TRINITY_DN26238_c0_g2_i1	---NA---	G-protein coupled receptor 158	1.12696
TRINITY_DN68555_c1_g3_i3	---NA---	zinc finger protein 862-like	1.12684
TRINITY_DN57008_c0_g1_i2	K14686	high affinity copper uptake protein 1-like	1.12516
TRINITY_DN68904_c4_g7_i2	---NA---	Cyclic GMP-AMP synthase	1.12112
TRINITY_DN41328_c0_g1_i1	K15682	E3 ubiquitin-protein ligase PDZRN3-like	1.12044
TRINITY_DN68371_c0_g2_i1	---NA---	trichohyalin-like	1.11687
TRINITY_DN45848_c0_g1_i2	---NA---	uncharacterized peptidase C1-like protein F26E4	1.11612
TRINITY_DN98288_c0_g1_i1	---NA---	heterogeneous nuclear ribonucleoprotein U-like protein	1.11501
TRINITY_DN32321_c0_g1_i1	---NA---	protein misato homolog 1-like	1.11349
TRINITY_DN52660_c1_g1_i1	---NA---	protein PML	1.11297
TRINITY_DN67697_c2_g2_i1	---NA---	zinc finger protein 862	1.11204
TRINITY_DN65797_c10_g1_i3	K14683	sodium-dependent phosphate transport protein 2B-like	1.11147
TRINITY_DN50673_c0_g2_i1	K21396	protein white-like	1.10991
TRINITY_DN65095_c0_g7_i1	---NA---	hypothetical protein	1.1068
TRINITY_DN68572_c3_g9_i1	---NA---	E3 ubiquitin-protein ligase RGLG5-like	1.10646
TRINITY_DN70905_c0_g1_i1	K10361	unconventional myosin-XV-like	1.10555
TRINITY_DN66810_c3_g1_i1	---NA---	phosphatidylinositol 3-kinase regulatory subunit alpha-like	1.10536
TRINITY_DN64657_c0_g2_i1	K11810	monocarboxylate transporter 12-like	1.10004
TRINITY_DN114907_c0_g1_i1	---NA---	Fibropellin-3	1.09997
TRINITY_DN66164_c0_g3_i9	K00901	diacylglycerol kinase beta-like	1.0998
TRINITY_DN59409_c0_g1_i2	K13858	putative sodium-driven chloride bicarbonate exchanger	1.09888
TRINITY_DN41667_c0_g1_i1	K21423	NADPH oxidase 4-like	1.09847
TRINITY_DN62608_c0_g1_i4	---NA---	phospholipid scramblase 1-like	1.09846
TRINITY_DN27234_c0_g2_i1	---NA---	sporulation-specific protein 15-like	1.09846
TRINITY_DN29778_c0_g2_i1	K12471	epsin-2-like	1.09635
TRINITY_DN65936_c0_g3_i1	K16817	HRAS-like suppressor 2	1.09589
TRINITY_DN60355_c0_g1_i1	K22750	glycine N-acyltransferase-like	1.09554
TRINITY_DN55224_c2_g1_i1	---NA---	endonuclease/reverse transcriptase	1.09525
TRINITY_DN50666_c0_g1_i1	---NA---	PREDICTED: uncharacterized protein LOC105317539	1.09459
TRINITY_DN60980_c0_g2_i1	---NA---	helicase with zinc finger domain 2-like	1.09445
TRINITY_DN68810_c0_g3_i2	---NA---	uncharacterized protein LOC110459297	1.09389
TRINITY_DN30411_c0_g1_i1	---NA---	predicted protein	1.09367
TRINITY_DN42265_c0_g1_i1	K06105	tight junction-associated protein 1-like	1.09356
TRINITY_DN68920_c0_g1_i6	K15261	Poly [ADP-ribose] polymerase 14	1.09338
TRINITY_DN68656_c0_g1_i3	---NA---	endonuclease/exonuclease/phosphatase family protein	1.09062
TRINITY_DN68732_c2_g4_i1	---NA---	hypothetical protein EGW08_004674, partial	1.08976
TRINITY_DN42866_c0_g1_i1	---NA---	uncharacterized protein LOC111107070	1.08976
TRINITY_DN66526_c1_g1_i1	---NA---	ankyrin repeat protein	1.08901
TRINITY_DN64490_c4_g1_i1	---NA---	uncharacterized protein LOC112576057	1.08685
TRINITY_DN55399_c0_g1_i1	---NA---	bactericidal permeability-increasing protein	1.08228
TRINITY_DN65597_c0_g5_i1	---NA---	Ankyrin repeat protein	1.08211
TRINITY_DN67955_c2_g2_i3	K20639	rho GTPase-activating protein 18-like	1.07939
TRINITY_DN52777_c0_g1_i1	---NA---	protocadherin Fat 4-like	1.0767
TRINITY_DN64993_c0_g1_i3	K07966	beta-1,4-galactosyltransferase 4-like	1.07666
TRINITY_DN68584_c0_g1_i5	---NA---	uncharacterized protein LOC110451457	1.07486
TRINITY_DN68365_c0_g1_i3	---NA---	putative zinc finger MYM-type protein 1-like	1.07313
TRINITY_DN67808_c1_g2_i1	---NA---	hypothetical protein BOV97_13130, partial	1.07182
TRINITY_DN12849_c0_g1_i1	K08202	organic cation transporter protein-like	1.06898
TRINITY_DN64810_c1_g1_i1	K00079	carbonyl reductase [NADPH] 1-like	1.06815
TRINITY_DN62720_c0_g2_i1	---NA---	C-factor	1.06786
TRINITY_DN64217_c0_g1_i4	K04513	ras-like GTP-binding protein Rho1	1.06781
TRINITY_DN59651_c0_g1_i1	---NA---	PREDICTED: uncharacterized protein LOC105324851	1.0657
TRINITY_DN56626_c0_g1_i1	---NA---	Nck-associated protein 5	1.06461
TRINITY_DN67999_c3_g13_i1	---NA---	hypothetical protein KP79_PYT01623	1.06375
TRINITY_DN66859_c0_g1_i1	---NA---	hypothetical protein CGI_10015342	1.06108
TRINITY_DN63469_c1_g1_i4	K10524	nicotinamide riboside kinase 2-like	1.05999
TRINITY_DN66730_c5_g1_i1	K11997	histone-lysine N-methyltransferase SETD1B-like	1.0572
TRINITY_DN66633_c6_g3_i1	---NA---	zinc finger protein 862-like	1.05675
TRINITY_DN62711_c2_g1_i2	K00626	acetyl-CoA acetyltransferase B, mitochondrial-like	1.05554
TRINITY_DN60140_c0_g2_i2	---NA---	putative mediator of RNA polymerase II transcription subunit 12	1.05485
TRINITY_DN68607_c1_g7_i1	K08051	pleckstrin homology domain-containing family A member 8-like	1.05455
TRINITY_DN57391_c0_g1_i1	---NA---	Retrovirus-related Pol polyprotein from type-2 retrotransposable element R2DM	1.04928
TRINITY_DN66416_c0_g1_i1	K10755	replication factor C subunit 4	1.04752
TRINITY_DN68062_c1_g2_i1	---NA---	DDE-type integrase/transposase/recombinase	1.04739
TRINITY_DN103043_c0_g1_i1	---NA---	5'-nucleotidase	1.0473
TRINITY_DN86424_c0_g1_i1	---NA---	adenylyl-sulfate reductase subunit alpha	1.0473
TRINITY_DN107760_c0_g1_i1	---NA---	beta actin	1.0473
TRINITY_DN73285_c0_g1_i1	---NA---	contactin-5-like	1.0473
TRINITY_DN36425_c0_g1_i2	---NA---	Cytochrome P450 1A1	1.0473
TRINITY_DN79612_c0_g2_i1	K16569	gamma-tubulin complex component 2-like	1.0473
TRINITY_DN87330_c0_g1_i1	K12383	ganglioside GM2 activator-like	1.0473
TRINITY_DN96250_c0_g1_i1	---NA---	NACHT and WD repeat domain-containing protein 2-like	1.0473
TRINITY_DN70999_c0_g1_i1	K00362	NAD(P)/FAD-dependent oxidoreductase	1.0473
TRINITY_DN59065_c0_g6_i1	---NA---	pentatricopeptide repeat-containing protein At2g22410, mitochondrial-like	1.0473
TRINITY_DN29286_c0_g3_i1	---NA---	PREDICTED: uncharacterized protein LOC109475986	1.0473
TRINITY_DN57166_c0_g2_i1	---NA---	protocadherin-16-like	1.0473
TRINITY_DN10273_c0_g2_i1	K12481	rabenosyn-5	1.0473
TRINITY_DN15434_c0_g1_i1	K15123	solute carrier family 25 member 45-like	1.0473
TRINITY_DN40638_c0_g1_i1	---NA---	uncharacterized protein LOC110453353	1.0473
TRINITY_DN16733_c0_g1_i1	---NA---	uncharacterized protein LOC111123750	1.0473
TRINITY_DN66779_c10_g24_i1	---NA---	regulator of microtubule dynamics protein 1	1.04669
TRINITY_DN64383_c0_g1_i3	K13365	Na(+)/H(+) exchange regulatory cofactor NHE-RF1-like	1.04315
TRINITY_DN60830_c0_g3_i1	---NA---	clathrin light chain A-like	1.04286
TRINITY_DN65633_c0_g3_i1	K03386	thioredoxin peroxidase	1.04249
TRINITY_DN67234_c5_g17_i2	---NA---	immediate early response gene 5-like protein	1.03996
TRINITY_DN21988_c0_g2_i1	---NA---	centromere protein V-like	1.03807
TRINITY_DN68940_c0_g2_i1	K15261	poly [ADP-ribose] polymerase 14	1.03745
TRINITY_DN67298_c1_g4_i5	---NA---	protein rtoA-like	1.03702
TRINITY_DN59090_c0_g5_i3	K16059	stromal interaction molecule 1-like	1.037
TRINITY_DN50064_c0_g1_i1	---NA---	proline-rich transmembrane protein 1-like	1.0342
TRINITY_DN58469_c0_g1_i1	K22987	cyclic AMP receptor-like protein A	1.03334
TRINITY_DN59166_c0_g1_i1	K11187	peroxiredoxin V	1.03256
TRINITY_DN42873_c0_g1_i2	K01623	fructose-bisphosphate aldolase-like	1.03061
TRINITY_DN38058_c0_g2_i1	K23543	coiled-coil domain-containing protein 115-like	1.02772
TRINITY_DN4011_c0_g1_i1	---NA---	diuretic hormone receptor-like	1.02772
TRINITY_DN12384_c0_g1_i1	---NA---	LOW QUALITY PROTEIN: uncharacterized protein LOC111107105	1.02772
TRINITY_DN68400_c13_g11_i1	---NA---	sporulation-specific protein 15-like	1.02772
TRINITY_DN66201_c7_g1_i2	---NA---	lateral signaling target protein 2 homolog	1.02771
TRINITY_DN52588_c0_g1_i1	---NA---	MAM and LDL-receptor class A domain-containing protein 2-like	1.02719
TRINITY_DN62732_c0_g1_i1	K00249	medium-chain specific acyl-CoA dehydrogenase, mitochondrial-like	1.0245
TRINITY_DN68632_c0_g2_i1	---NA---	uncharacterized protein LOC114957238	1.0229
TRINITY_DN67267_c4_g1_i1	K08654	proprotein convertase subtilisin/kexin type 5-like	1.02279
TRINITY_DN77900_c0_g1_i1	---NA---	RNA-directed DNA polymerase from transposon BS	1.01971
TRINITY_DN38565_c0_g1_i1	---NA---	uncharacterized protein LOC111130304	1.01971
TRINITY_DN63030_c0_g1_i3	K01053	regucalcin	1.01944
TRINITY_DN56836_c0_g1_i1	---NA---	fem-1-like protein C	1.01323
TRINITY_DN38957_c0_g2_i1	K11550	Kinetochore protein Spc25	1.01302
TRINITY_DN60243_c1_g1_i1	K04727	apoptosis-inducing factor 1, mitochondrial-like	1.01276
TRINITY_DN62353_c0_g3_i1	K07819	beta-1,3-galactosyltransferase 1-like	1.01219
TRINITY_DN21441_c0_g1_i1	---NA---	predicted protein	1.01127
TRINITY_DN68081_c0_g2_i1	---NA---	Protein mab-21-like 3	1.01118
TRINITY_DN68951_c3_g3_i5	---NA---	uncharacterized protein LOC110456272	1.01024
TRINITY_DN27652_c0_g2_i1	---NA---	heat shock 70 kDa protein 12A-like	1.00964
TRINITY_DN67964_c0_g1_i2	K11995	deoxyribonuclease-1-like	1.00963
TRINITY_DN62381_c0_g1_i1	K17253	lactadherin-like	1.00955
TRINITY_DN67135_c2_g1_i1	K00728	protein O-mannosyl-transferase 1-like	1.00464
TRINITY_DN61359_c0_g2_i1	---NA---	transcriptional activator Myb-like	1.00226
TRINITY_DN40394_c0_g2_i1	---NA---	protein CDV3 homolog	1.00183
TRINITY_DN67127_c0_g1_i1	---NA---	uncharacterized protein LOC110463370	1.00128
TRINITY_DN67054_c0_g1_i8	K23088	stimulated by retinoic acid gene 6 protein-like	1.00112
TRINITY_DN58527_c0_g4_i2	---NA---	uncharacterized protein LOC106176180	1.00085
TRINITY_DN67541_c7_g2_i1	K11296	high mobility group-T protein-like	0.999593
TRINITY_DN4631_c0_g1_i1	K01410	mitochondrial intermediate peptidase-like	0.999444
TRINITY_DN63687_c0_g3_i2	K12076	Disks large-like protein 1	0.998438
TRINITY_DN62762_c0_g1_i1	K08807	serine/threonine-protein kinase pim-3-like	0.9956
TRINITY_DN68154_c1_g2_i1	K06265	dystroglycan-like	0.994928
TRINITY_DN67660_c0_g11_i3	---NA---	titin-like	0.992968
TRINITY_DN57642_c0_g1_i2	K11390	citrate lyase subunit beta-like protein, mitochondrial	0.992948
TRINITY_DN65954_c4_g2_i2	---NA---	protein FAM43A-like	0.992863
TRINITY_DN68994_c10_g4_i5	---NA---	Mediator of RNA polymerase II transcription subunit 25	0.991753
TRINITY_DN68181_c0_g2_i2	---NA---	Transposon Ty3-I Gag-Pol polyprotein	0.990763
TRINITY_DN67847_c3_g3_i1	---NA---	uncharacterized protein LOC110458648	0.9881
TRINITY_DN65413_c9_g2_i3	---NA---	uncharacterized protein LOC112562856	0.987962
TRINITY_DN28916_c0_g2_i1	---NA---	DPY30 domain-containing protein 1-like	0.987493
TRINITY_DN67470_c0_g4_i1	---NA---	Sushi, von Willebrand factor type A, EGF and pentraxin domain-containing protein 1	0.987493
TRINITY_DN23717_c0_g1_i1	K21771	G2/mitotic-specific cyclin-B3-like	0.987208
TRINITY_DN68961_c12_g23_i5	---NA---	NACHT, LRR and PYD domains-containing protein 3-like	0.985222
TRINITY_DN65346_c0_g3_i1	---NA---	brevican core protein	0.985064
TRINITY_DN66674_c8_g5_i1	K20526	myophilin	0.985058
TRINITY_DN67442_c0_g1_i13	---NA---	ceramide kinase-like	0.984335
TRINITY_DN66738_c8_g1_i2	K17095	annexin A4-like	0.982781
TRINITY_DN66810_c2_g1_i1	---NA---	P30 adhesin	0.982743
TRINITY_DN66764_c0_g2_i2	---NA---	Zonadhesin	0.982346
TRINITY_DN41632_c0_g1_i2	---NA---	cardiomyopathy-associated protein 5-like	0.979898
TRINITY_DN64202_c1_g1_i1	---NA---	E-selectin-like	0.979749
TRINITY_DN57663_c0_g2_i1	---NA---	fibrillin-1-like	0.979749
TRINITY_DN58968_c0_g1_i1	---NA---	NXPE family member 2-like	0.977057
TRINITY_DN68834_c8_g3_i2	---NA---	predicted protein	0.976723
TRINITY_DN79478_c0_g1_i1	---NA---	zinc finger MYND domain-containing protein 15-like	0.976655
TRINITY_DN54958_c0_g1_i1	K09407	forkhead box protein N3-like	0.972382
TRINITY_DN64948_c0_g1_i1	---NA---	putative IQ motif and ankyrin repeat domain-containing protein	0.971438
TRINITY_DN67102_c3_g1_i3	---NA---	hypothetical protein KP79_PYT22389	0.970824
TRINITY_DN67586_c2_g6_i2	---NA---	Transmembrane protein 53	0.970508
TRINITY_DN68195_c3_g6_i1	---NA---	PREDICTED: uncharacterized protein LOC105342610	0.970115
TRINITY_DN64983_c1_g6_i2	---NA---	tripartite motif-containing protein 45	0.969774
TRINITY_DN68568_c4_g1_i1	---NA---	ATP-binding cassette sub-family F member 1	0.968663
TRINITY_DN68996_c1_g1_i1	---NA---	sushi, von Willebrand factor type A, EGF and pentraxin domain-containing protein 1	0.968663
TRINITY_DN52785_c0_g2_i3	---NA---	protein PLANT CADMIUM RESISTANCE 3-like	0.968593
TRINITY_DN65232_c0_g1_i4	---NA---	uncharacterized protein LOC110447870	0.967483
TRINITY_DN49492_c0_g1_i1	K10879	DNA repair protein XRCC2-like	0.967193
TRINITY_DN67850_c3_g2_i2	---NA---	uncharacterized protein C1orf131 homolog	0.965355
TRINITY_DN10936_c0_g1_i1	---NA---	calmodulin-beta-like	0.964474
TRINITY_DN63149_c0_g2_i1	---NA---	uncharacterized protein LOC110461435	0.962773
TRINITY_DN63747_c0_g1_i3	K10807	ribonucleoside-diphosphate reductase large subunit	0.959858
TRINITY_DN64880_c5_g1_i1	---NA---	cytochrome P450 4A25-like	0.959416
TRINITY_DN63739_c1_g1_i2	---NA---	leucine-rich alpha-2-glycoprotein	0.959416
TRINITY_DN38715_c0_g2_i1	---NA---	magnesium-dependent phosphatase 1-like	0.958796
TRINITY_DN68988_c10_g3_i1	---NA---	multiple epidermal growth factor-like domains protein 10	0.958796
TRINITY_DN69949_c0_g1_i1	K13752	sodium/potassium/calcium exchanger 4-like	0.958796
TRINITY_DN24201_c0_g1_i1	K05022	chloride intracellular channel protein 2-like	0.958158
TRINITY_DN68781_c1_g7_i8	---NA---	Exodeoxyribonuclease III	0.957397
TRINITY_DN67937_c2_g1_i2	---NA---	uncharacterized protein LOC110455930	0.95433
TRINITY_DN99738_c0_g1_i1	---NA---	Uncharacterized protein APZ42_000269	0.951681
TRINITY_DN57007_c0_g1_i1	---NA---	hypothetical protein LOTGIDRAFT_233378	0.951426
TRINITY_DN65199_c0_g1_i5	K13304	Serine/threonine-protein kinase Sgk3	0.951305
TRINITY_DN66037_c0_g1_i8	---NA---	xenotropic and polytropic retrovirus receptor 1 homolog	0.950032
TRINITY_DN66267_c1_g6_i1	---NA---	alanine racemase, catabolic-like	0.94812
TRINITY_DN39952_c0_g2_i1	K08181	monocarboxylate transporter 5-like	0.94812
TRINITY_DN58391_c0_g2_i1	---NA---	protein fem-1 homolog C-like	0.947289
TRINITY_DN67916_c1_g1_i1	---NA---	uncharacterized protein LOC111106199	0.944746
TRINITY_DN68449_c0_g3_i6	---NA---	caspase-1-like	0.944581
TRINITY_DN77350_c0_g1_i1	K08866	dual specificity protein kinase Ttk-like	0.944433
TRINITY_DN95790_c0_g1_i1	K09186	histone-lysine N-methyltransferase 2A	0.944433
TRINITY_DN112442_c0_g1_i1	K09360	homeobox protein B-H1-like	0.944433
TRINITY_DN105672_c0_g1_i1	---NA---	PR domain zinc finger protein 1-like	0.944433
TRINITY_DN105248_c0_g1_i1	---NA---	PREDICTED: uncharacterized protein LOC105329176	0.944433
TRINITY_DN103802_c0_g1_i1	---NA---	retinal-binding protein-like	0.944433
TRINITY_DN94617_c0_g1_i1	---NA---	shell protein-4	0.944433
TRINITY_DN67125_c0_g2_i1	---NA---	splicing factor 3B subunit 3	0.944433
TRINITY_DN75892_c0_g1_i1	K11997	tripartite motif-containing protein 3-like	0.944433
TRINITY_DN2983_c0_g2_i1	---NA---	type I glyceraldehyde-3-phosphate dehydrogenase	0.944433
TRINITY_DN22568_c0_g1_i1	---NA---	uncharacterized protein LOC111134313	0.944433
TRINITY_DN94158_c0_g1_i1	---NA---	uncharacterized serine-rich protein C215	0.944433
TRINITY_DN64584_c0_g1_i6	---NA---	putative glutathione hydrolase light chain 3	0.942286
TRINITY_DN53339_c0_g4_i1	K01940	argininosuccinate synthase-like protein	0.941977
TRINITY_DN58173_c0_g2_i1	K08049	adenylate cyclase type 9	0.939675
TRINITY_DN62781_c0_g3_i1	K04077	heat shock protein 60	0.937571
TRINITY_DN66911_c4_g1_i1	---NA---	citron Rho-interacting kinase-like	0.937475
TRINITY_DN43784_c0_g1_i1	K02087	cyclin-dependent kinase 1	0.93745
TRINITY_DN41781_c0_g1_i1	---NA---	tissue inhibitor of metalloproteinase	0.937273
TRINITY_DN50075_c0_g1_i1	---NA---	GTP-binding protein 1-like	0.936534
TRINITY_DN67701_c2_g5_i2	K14386	sodium-coupled monocarboxylate transporter 1-like	0.934732
TRINITY_DN54254_c0_g1_i1	K00167	2-oxoisovalerate dehydrogenase subunit beta, mitochondrial-like	0.934228
TRINITY_DN39952_c0_g1_i1	---NA---	monocarboxylate transporter 12-like	0.933105
TRINITY_DN15052_c0_g2_i1	---NA---	GNAT family N-acetyltransferase	0.933015
TRINITY_DN68316_c0_g1_i1	K22125	myoferlin-like	0.932662
TRINITY_DN66649_c1_g3_i2	K05728	tyrosine-protein kinase CSK	0.932239
TRINITY_DN65566_c1_g3_i1	K00453	tryptophan 2,3-dioxygenase-like	0.930627
TRINITY_DN68653_c0_g5_i1	---NA---	Craniofacial development protein 2	0.928643
TRINITY_DN32536_c0_g1_i1	K02136	ATP synthase subunit gamma, mitochondrial-like	0.927017
TRINITY_DN79126_c0_g1_i1	K14443	Protein BTG1	0.926654
TRINITY_DN56610_c0_g1_i2	K10223	cholesterol 25-hydroxylase-like	0.923794
TRINITY_DN65464_c0_g1_i1	K21124	adapter protein CIKS	0.922772
TRINITY_DN67372_c11_g2_i3	K01800	maleylacetoacetate isomerase-like	0.920463
TRINITY_DN66916_c4_g2_i1	---NA---	mammalian ependymin-related protein 1-like	0.919033
TRINITY_DN96709_c0_g1_i1	---NA---	Monocarboxylate transporter 9	0.917303
TRINITY_DN24214_c0_g2_i1	K04261	prostaglandin E2 receptor EP4 subtype-like	0.917303
TRINITY_DN63114_c0_g1_i1	---NA---	SH3 domain-binding protein 2-like	0.915427
TRINITY_DN65422_c0_g1_i2	---NA---	MOB kinase activator 2-like	0.914344
TRINITY_DN68296_c1_g7_i1	---NA---	E3 ubiquitin-protein ligase mind-bomb-like	0.91257
TRINITY_DN39729_c0_g1_i1	---NA---	predicted protein	0.91214
TRINITY_DN18404_c0_g1_i2	K10772	DNA-(apurinic or apyrimidinic site) lyase 2-like	0.911759
TRINITY_DN8347_c0_g1_i1	---NA---	uncharacterized protein LOC106164908	0.911759
TRINITY_DN64332_c0_g1_i1	---NA---	digestive cysteine proteinase 1-like	0.911463
TRINITY_DN48335_c0_g2_i1	---NA---	Exocyst complex component 2	0.910036
TRINITY_DN67406_c2_g1_i1	---NA---	hypothetical protein CGI_10008952	0.906822
TRINITY_DN50066_c0_g1_i1	K07819	Beta-1,3-galactosyltransferase 1	0.906767
TRINITY_DN45507_c0_g1_i2	---NA---	failed axon connections homolog	0.905693
TRINITY_DN10999_c0_g1_i1	K04734	NF-kappa-B inhibitor	0.90512
TRINITY_DN64748_c0_g2_i3	---NA---	alpha-protein kinase vwkA-like	0.904663
TRINITY_DN55712_c0_g2_i1	---NA---	laccase-2-like	0.903209
TRINITY_DN63476_c0_g3_i5	---NA---	protein phosphatase 1 regulatory subunit 12A-like	0.903183
TRINITY_DN24491_c0_g1_i1	K08592	sentrin-specific protease 1-like	0.902798
TRINITY_DN63476_c0_g4_i1	K06270	protein phosphatase 1 regulatory subunit 12A-like	0.901933
TRINITY_DN67381_c0_g1_i5	---NA---	Chromatin modification-related protein YNG2	0.90129
TRINITY_DN64537_c0_g1_i1	K04550	prolow-density lipoprotein receptor-related protein 1-like	0.900433
TRINITY_DN68428_c3_g2_i7	K17551	neurabin-1	0.900279
TRINITY_DN66163_c1_g1_i3	---NA---	major facilitator superfamily domain-containing protein 9-like	0.900029
TRINITY_DN64941_c0_g2_i1	K01647	putative citrate synthase 2	0.899503
TRINITY_DN66169_c0_g1_i1	K03841	fructose-1,6-bisphosphatase 1	0.897715
TRINITY_DN68963_c0_g5_i1	---NA---	Transposon Ty3-G Gag-Pol polyprotein	0.897275
TRINITY_DN61352_c0_g2_i1	K05648	ATP-binding cassette sub-family A member 5	0.896542
TRINITY_DN86615_c0_g1_i1	---NA---	hypothetical protein KP79_PYT25307	0.896542
TRINITY_DN66545_c0_g1_i4	K12741	heterogeneous nuclear ribonucleoprotein A1, A2/B1 homolog	0.894489
TRINITY_DN61647_c0_g2_i2	K21952	caskin-1	0.894174
TRINITY_DN36368_c0_g2_i1	K11801	DDB1- and CUL4-associated factor 11	0.89393
TRINITY_DN12543_c0_g1_i1	K02881	39S ribosomal protein L18, mitochondrial-like	0.893726
TRINITY_DN50587_c0_g1_i2	---NA---	inositol hexakisphosphate kinase 2-like	0.893621
TRINITY_DN45633_c0_g2_i1	K23047	putative E3 ubiquitin-protein ligase UNKL	0.893426
TRINITY_DN65804_c0_g1_i2	---NA---	fos-related antigen 1-like	0.893128
TRINITY_DN33885_c0_g1_i1	---NA---	tripartite motif-containing protein 2-like	0.89119
TRINITY_DN67257_c2_g2_i1	K14165	dual specificity protein phosphatase 22-B-like	0.890527
TRINITY_DN10499_c0_g1_i1	---NA---	EF-hand and coiled-coil domain-containing protein 1	0.890527
TRINITY_DN118577_c0_g1_i1	---NA---	F-box/LRR-repeat protein 2	0.890188
TRINITY_DN53130_c0_g1_i1	K18200	peptidyl-glycine alpha-amidating monooxygenase B-like	0.889746
TRINITY_DN62889_c0_g1_i1	K18753	mRNA decay activator protein ZFP36L2-A-like	0.889157
TRINITY_DN61097_c0_g3_i1	---NA---	uncharacterized protein LOC106157457	0.885631
TRINITY_DN55348_c0_g2_i1	---NA---	uncharacterized protein LOC110450547	0.884626
TRINITY_DN4488_c0_g1_i1	K04734	inhibitor of NF-kappaB	0.883777
TRINITY_DN52821_c0_g1_i1	---NA---	WD repeat-containing protein 92	0.883703
TRINITY_DN67637_c5_g1_i2	---NA---	histone PARylation factor 1-like	0.883611
TRINITY_DN56961_c0_g4_i2	---NA---	MIP18 family protein FAM96A-like	0.882328
TRINITY_DN68375_c2_g5_i1	K00149	4-trimethylaminobutyraldehyde dehydrogenase-like	0.880514
TRINITY_DN68307_c1_g6_i1	K17503	protein phosphatase 1H	0.87809
TRINITY_DN61948_c0_g1_i3	K11353	cell protein CPr2	0.877623
TRINITY_DN68289_c0_g4_i1	K10093	tandem repeat galectin	0.876698
TRINITY_DN63551_c0_g1_i2	K01068	acyl-coenzyme A amino acid N-acyltransferase 2-like	0.874854
TRINITY_DN51062_c0_g2_i2	---NA---	death ligand signal enhancer-like	0.874189
TRINITY_DN21448_c0_g1_i1	---NA---	large neutral amino acids transporter small subunit 1-like	0.87361
TRINITY_DN26264_c0_g1_i1	K17577	SH2 domain-containing protein 4B-like	0.873186
TRINITY_DN66108_c0_g1_i1	---NA---	reverse transcriptase family protein	0.873138
TRINITY_DN65415_c0_g1_i3	---NA---	Fatty-acid amide hydrolase 1	0.870632
TRINITY_DN4271_c0_g1_i1	---NA---	paired box protein Pax-2a-like	0.870525
TRINITY_DN7089_c0_g1_i1	---NA---	uncharacterized protein LOC110457086	0.86938
TRINITY_DN45817_c0_g1_i1	---NA---	carbonic anhydrase	0.868496
TRINITY_DN5819_c0_g1_i1	---NA---	mapk-regulated corepressor-interacting protein 1-like	0.868377
TRINITY_DN56310_c0_g3_i1	---NA---	von Willebrand factor D and EGF domain-containing protein	0.868144
TRINITY_DN59383_c0_g1_i1	K06104	angiomotin-like protein 1	0.86752
TRINITY_DN66421_c0_g1_i2	---NA---	mucin-17-like	0.864696
TRINITY_DN5209_c0_g1_i1	K15380	heme transporter hrg1-A-like	0.864508
TRINITY_DN67761_c2_g15_i1	K12302	vesicular glutamate transporter	0.863941
TRINITY_DN57127_c0_g1_i1	K06067	histone deacetylase 1	0.863099
TRINITY_DN60076_c0_g1_i1	K13370	estradiol 17-beta-dehydrogenase 8-like	0.862728
TRINITY_DN59891_c0_g1_i1	---NA---	Dihydroorotase	0.862197
TRINITY_DN68686_c0_g3_i2	---NA---	heat shock 70 kDa protein 12B	0.861493
TRINITY_DN66240_c0_g4_i1	K12891	serine/arginine-rich splicing factor 2-like	0.859973
TRINITY_DN36992_c0_g1_i1	---NA---	transmembrane protein 254	0.859133
TRINITY_DN36680_c0_g1_i1	K17501	protein phosphatase 1E-like	0.859012
TRINITY_DN26803_c0_g1_i1	---NA---	REST corepressor 3-like	0.858392
TRINITY_DN67295_c3_g1_i7	K23573	Nesprin-1	0.857246
TRINITY_DN57881_c0_g1_i1	K08136	testican-1-like	0.856603
TRINITY_DN68195_c3_g1_i1	---NA---	uncharacterized protein LOC111138489	0.853257
TRINITY_DN95942_c0_g2_i1	K22075	bolA-like protein 3	0.852886
TRINITY_DN67377_c0_g1_i4	K05929	phosphoethanolamine N-methyltransferase 3	0.852846
TRINITY_DN66983_c8_g1_i1	K09646	retinoid-inducible serine carboxypeptidase-like	0.85255
TRINITY_DN39747_c0_g3_i1	---NA---	uncharacterized protein LOC110462780	0.851286
TRINITY_DN21105_c0_g1_i1	K02127	mitochondrial ATP synthase B subunit	0.850548
TRINITY_DN68198_c1_g14_i1	---NA---	zinc finger protein 184-like	0.848083
TRINITY_DN67408_c0_g2_i1	---NA---	PREDICTED: uncharacterized protein LOC106811049	0.844425
TRINITY_DN68783_c1_g4_i6	K06820	plexin-B	0.844019
TRINITY_DN62877_c1_g1_i1	K14209	proton-coupled amino acid transporter 2-like	0.842434
TRINITY_DN64328_c0_g2_i2	---NA---	arrestin domain-containing protein 4-like	0.841503
TRINITY_DN67161_c0_g2_i1	---NA---	titin-like	0.841447
TRINITY_DN50201_c0_g1_i1	---NA---	PREDICTED: uncharacterized protein LOC106568585, partial	0.839093
TRINITY_DN54183_c0_g1_i2	K03174	TNF receptor-associated factor 3	0.839093
TRINITY_DN62230_c0_g1_i1	K23282	Pleckstrin homology domain-containing family M member 3	0.838647
TRINITY_DN7254_c0_g1_i1	---NA---	negative regulator of reactive oxygen species-like	0.838552
TRINITY_DN65580_c3_g1_i1	K07509	trifunctional enzyme subunit beta, mitochondrial-like	0.838366
TRINITY_DN66890_c0_g1_i1	K01772	ferrochelatase, mitochondrial	0.838264
TRINITY_DN68664_c0_g1_i19	---NA---	Solute carrier organic anion transporter family member 4C1	0.838206
TRINITY_DN59682_c0_g1_i1	K13868	b(0,+)-type amino acid transporter 1-like	0.838196
TRINITY_DN66506_c0_g1_i3	---NA---	nuclear Factor kappa B-a	0.835282
TRINITY_DN64434_c0_g1_i2	---NA---	protein SSUH2 homolog	0.834523
TRINITY_DN96741_c0_g1_i1	---NA---	conserved Plasmodium protein, unknown function	0.833837
TRINITY_DN58639_c0_g3_i1	---NA---	death domain-containing protein CRADD-like	0.833837
TRINITY_DN10681_c0_g1_i1	---NA---	Down syndrome cell adhesion molecule	0.833837
TRINITY_DN71424_c0_g1_i1	K06767	Down syndrome cell adhesion molecule homolog	0.833837
TRINITY_DN35902_c0_g1_i1	---NA---	hypothetical protein CAPTEDRAFT_205365	0.833837
TRINITY_DN32272_c0_g1_i1	---NA---	jmjC domain-containing protein 4-like	0.833837
TRINITY_DN70646_c0_g1_i1	K22733	magnesium transporter NIPA2-like	0.833837
TRINITY_DN60189_c0_g2_i1	---NA---	multiple epidermal growth factor-like domains protein	0.833837
TRINITY_DN111955_c0_g1_i1	---NA---	NACHT and WD repeat domain-containing protein 2-like	0.833837
TRINITY_DN113479_c0_g1_i1	---NA---	PREDICTED: uncharacterized protein LOC108589676	0.833837
TRINITY_DN104889_c0_g1_i1	---NA---	ribosomal-protein-alanine acetyltransferase	0.833837
TRINITY_DN76334_c0_g1_i1	---NA---	sn1-specific diacylglycerol lipase beta	0.833837
TRINITY_DN85646_c0_g1_i1	---NA---	TCDD-inducible poly [ADP-ribose] polymerase	0.833837
TRINITY_DN96864_c0_g1_i1	K20349	transmembrane emp24 domain-containing protein 7-like	0.833837
TRINITY_DN68954_c1_g9_i1	---NA---	tyrosine-protein kinase Mer-like	0.833837
TRINITY_DN20986_c0_g1_i1	---NA---	uncharacterized protein LOC110460842	0.833837
TRINITY_DN94841_c0_g1_i1	---NA---	uncharacterized protein LOC114345898	0.833837
TRINITY_DN71058_c0_g1_i1	---NA---	UPF0764 protein C16orf89-like	0.833837
TRINITY_DN100534_c0_g1_i1	---NA---	zinc finger BED domain-containing protein 1-like	0.833837
TRINITY_DN37304_c0_g2_i1	---NA---	zinc finger CCCH-type with G patch domain-containing protein-like	0.833837
TRINITY_DN61474_c1_g10_i2	K16061	baculoviral IAP repeat-containing protein 3-like	0.833715
TRINITY_DN39399_c0_g1_i1	K07556	ATP synthase mitochondrial F1 complex assembly factor 2-like	0.83237
TRINITY_DN65620_c0_g1_i1	K05614	Excitatory amino acid transporter 1	0.832226
TRINITY_DN68984_c13_g3_i2	K10955	von Willebrand factor D and EGF domain-containing protein	0.831991
TRINITY_DN57017_c0_g1_i1	---NA---	PIH1 domain-containing protein 1-like	0.831903
TRINITY_DN42041_c0_g1_i1	K03522	electron transfer flavoprotein subunit alpha, mitochondrial-like	0.830991
TRINITY_DN114275_c0_g1_i1	---NA---	Parathyroid hormone/parathyroid hormone-related peptide receptor	0.830857
TRINITY_DN52865_c0_g1_i1	---NA---	Putative cation-transporting ATPase 13A3	0.830857
TRINITY_DN38707_c0_g1_i2	---NA---	unnamed protein product	0.830857
TRINITY_DN52629_c0_g1_i3	---NA---	hypothetical protein LOTGIDRAFT_203888	0.828175
TRINITY_DN39811_c0_g2_i1	K06756	neuroglian-like	0.825018
TRINITY_DN43733_c0_g1_i1	K13108	smad nuclear-interacting protein 1-like	0.825018
TRINITY_DN66162_c22_g1_i2	---NA---	cell wall protein DAN4-like	0.822814
TRINITY_DN59603_c0_g1_i1	K15304	ran-binding protein 3-like	0.821829
TRINITY_DN49189_c0_g1_i1	K02838	ribosome-recycling factor, mitochondrial-like	0.821039
TRINITY_DN67539_c0_g1_i1	K08843	leucine-rich repeat serine/threonine-protein kinase 1	0.820989
TRINITY_DN68646_c1_g17_i4	---NA---	Interferon-inducible GTPase 5	0.820974
TRINITY_DN67749_c0_g3_i3	---NA---	PREDICTED: uncharacterized protein LOC106814066	0.818069
TRINITY_DN39063_c0_g1_i2	---NA---	carotene and beta,beta-carotene 9',10'-oxygenase	0.81724
TRINITY_DN68928_c2_g10_i1	---NA---	cold-induced wall associated kinase	0.81724
TRINITY_DN46768_c0_g1_i1	---NA---	low-density lipoprotein receptor-related protein 6-like	0.816562
TRINITY_DN65223_c5_g1_i2	K10257	omega-3 fatty acid desaturase, endoplasmic reticulum-like	0.816386
TRINITY_DN66774_c1_g1_i3	---NA---	reverse transcriptase family protein	0.813918
TRINITY_DN36096_c0_g1_i1	K00281	Glycine dehydrogenase [decarboxylating], mitochondrial	0.813785
TRINITY_DN38809_c0_g2_i1	---NA---	Insulin-like growth factor 1 receptor	0.813641
TRINITY_DN63285_c0_g1_i1	---NA---	deferrochelatase/peroxidase YfeX	0.812333
TRINITY_DN63360_c0_g1_i1	---NA---	neural cell adhesion molecule L1-like	0.812091
TRINITY_DN25373_c0_g1_i1	K01047	Phospholipase A2 isozymes PA3A/PA3B/PA5	0.811222
TRINITY_DN63158_c0_g2_i1	K01316	Enteropeptidase	0.809546
TRINITY_DN67325_c3_g1_i1	K07573	exosome complex component CSL4-like	0.809163
TRINITY_DN65980_c9_g4_i1	---NA---	EGF-like domain-containing protein	0.809075
TRINITY_DN46757_c0_g1_i2	K13443	epididymal secretory protein E1-like	0.80835
TRINITY_DN35882_c0_g1_i1	---NA---	hypothetical protein C0Q70_01037	0.807997
TRINITY_DN28252_c0_g1_i2	---NA---	PREDICTED: uncharacterized protein LOC106817244	0.807997
TRINITY_DN33450_c0_g2_i1	---NA---	uncharacterized protein LOC110446311	0.807997
TRINITY_DN57098_c2_g3_i3	---NA---	NF-kappa-B essential modulator-like	0.807019
TRINITY_DN59091_c0_g3_i1	---NA---	kelch-like protein	0.804697
TRINITY_DN68510_c0_g3_i1	---NA---	reverse transcriptase family protein	0.802551
TRINITY_DN43427_c0_g1_i2	---NA---	baculoviral IAP repeat-containing protein 3-like	0.801595
TRINITY_DN65305_c0_g4_i2	---NA---	Pleckstrin homology domain-containing family A member 7	0.801551
TRINITY_DN60965_c0_g1_i1	---NA---	ergothioneine biosynthesis protein 1	0.801225
TRINITY_DN65601_c0_g3_i1	---NA---	Poly [ADP-ribose] polymerase 14	0.800489
TRINITY_DN63839_c0_g2_i5	K13207	CUGBP Elav-like family member 2	0.795473
TRINITY_DN67511_c1_g1_i2	---NA---	RNA-directed DNA polymerase from mobile element jockey	0.793584
TRINITY_DN29525_c0_g1_i1	K22066	bolA-like protein DDB_G0274169	0.792844
TRINITY_DN14951_c0_g2_i1	---NA---	neuronal acetylcholine receptor subunit alpha-10-like	0.79217
TRINITY_DN59715_c1_g1_i1	K13248	pyridoxal phosphate phosphatase PHOSPHO2-like	0.791242
TRINITY_DN62233_c1_g1_i1	K23551	fascin	0.786894
TRINITY_DN60539_c0_g1_i2	---NA---	hypothetical protein LOTGIDRAFT_229475	0.785894
TRINITY_DN26200_c0_g1_i1	---NA---	TPR and ankyrin repeat-containing protein 1-like	0.785894
TRINITY_DN67503_c6_g6_i1	---NA---	ras-related protein Rab-8A-like	0.784106
TRINITY_DN67699_c0_g2_i1	K17964	leucine-rich PPR motif-containing protein, mitochondrial-like	0.78349
TRINITY_DN68999_c7_g2_i1	---NA---	hypothetical protein LOTGIDRAFT_170693	0.783176
TRINITY_DN42850_c0_g1_i1	---NA---	proto-oncogene c-Fos-like	0.783176
TRINITY_DN66262_c2_g2_i1	K10317	F-box only protein 42-like	0.783009
TRINITY_DN62704_c0_g1_i2	K14158	sodium:glucose cotransporter 1-like protein	0.782667
TRINITY_DN61346_c0_g2_i1	---NA---	circularly permutated Ras protein 1-like	0.78245
TRINITY_DN49200_c0_g1_i1	---NA---	cadherin domain/calx-beta domain protein	0.780615
TRINITY_DN36558_c0_g1_i1	K17306	armadillo repeat-containing protein 1-like	0.780456
TRINITY_DN60963_c0_g2_i3	K02128	mitochondrial ATP synthase subunit 9	0.778633
TRINITY_DN67306_c1_g1_i1	---NA---	PREDICTED: uncharacterized protein LOC105440428	0.778466
TRINITY_DN68218_c2_g1_i2	---NA---	tetratricopeptide repeat protein 38-like	0.778319
TRINITY_DN61188_c0_g1_i1	---NA---	GH3 domain-containing protein-like	0.778289
TRINITY_DN67151_c1_g1_i2	---NA---	unnamed protein product	0.777206
TRINITY_DN27507_c0_g1_i1	K01899	succinate--CoA ligase [ADP/GDP-forming] subunit alpha, mitochondrial-like	0.77634
TRINITY_DN26540_c0_g2_i1	K17480	tyrosine-protein kinase abl-1-like	0.776123
TRINITY_DN68131_c1_g5_i1	---NA---	synaptogenesis protein syg-2-like	0.775042
TRINITY_DN64679_c0_g2_i1	K04237	partitioning defective 3 homolog	0.773784
TRINITY_DN68951_c3_g4_i1	---NA---	rabankyrin-5-like	0.773464
TRINITY_DN63435_c0_g1_i1	K05657	ATP-binding cassette sub-family B member 10, mitochondrial	0.772901
TRINITY_DN55272_c0_g2_i1	K14677	aminoacylase-1-like	0.771579
TRINITY_DN68628_c0_g1_i2	---NA---	uncharacterized protein LOC110442712	0.770648
TRINITY_DN64239_c0_g1_i1	K14555	transducin beta-like protein 3	0.769904
TRINITY_DN68983_c10_g2_i5	K12026	tripartite motif-containing protein 2-like	0.769375
TRINITY_DN52560_c0_g1_i1	K10134	etoposide-induced protein	0.769152
TRINITY_DN67357_c1_g6_i4	K14297	nuclear pore complex protein Nup98-Nup96-like	0.768272
TRINITY_DN50556_c0_g1_i1	K17725	persulfide dioxygenase	0.767793
TRINITY_DN67565_c1_g1_i3	K10362	Unconventional myosin-XVIIIa	0.767607
TRINITY_DN67906_c0_g3_i2	---NA---	ras-related protein RHN1-like	0.765552
TRINITY_DN67328_c0_g1_i1	K05694	receptor-type tyrosine-protein phosphatase beta	0.764875
TRINITY_DN113081_c0_g1_i1	---NA---	serine/threonine-protein phosphatase PP1-beta catalytic subunit	0.763757
TRINITY_DN66930_c1_g1_i6	K05399	bactericidal/permeability-increasing protein 2	0.762293
TRINITY_DN104496_c0_g1_i1	---NA---	lethal(3)malignant brain tumor-like protein 3	0.762099
TRINITY_DN8225_c0_g1_i1	---NA---	PREDICTED: uncharacterized protein LOC107338493	0.762099
TRINITY_DN6819_c0_g1_i1	K00444	protein Wnt-5a-like	0.762099
TRINITY_DN67121_c2_g4_i1	---NA---	schlafen-like protein 1	0.762099
TRINITY_DN64861_c0_g1_i1	K09649	thymus-specific serine protease	0.760004
TRINITY_DN67799_c0_g3_i18	K21853	dedicator of cytokinesis protein 9-like	0.759482
TRINITY_DN67550_c1_g1_i2	---NA---	cinnamyl alcohol dehydrogenase 8-like	0.759207
TRINITY_DN62655_c0_g3_i1	---NA---	pleckstrin homology domain-containing family D member 1-like	0.758978
TRINITY_DN51602_c0_g1_i1	K19027	Zinc finger FYVE domain-containing protein 26	0.758957
TRINITY_DN67814_c4_g14_i1	---NA---	dentin sialophosphoprotein-like	0.757191
TRINITY_DN56214_c0_g2_i1	K05285	GPI ethanolamine phosphate transferase 1-like	0.75557
TRINITY_DN39919_c0_g1_i1	---NA---	Epsin-1	0.75487
TRINITY_DN80163_c0_g1_i1	---NA---	uncharacterized protein LOC110465164	0.75487
TRINITY_DN68389_c6_g12_i3	K01363	cathepsin B	0.754477
TRINITY_DN64537_c0_g4_i1	K04550	prolow-density lipoprotein receptor-related protein 1-like	0.754218
TRINITY_DN48889_c0_g1_i1	K07511	enoyl-CoA hydratase, mitochondrial-like	0.752647
TRINITY_DN66697_c0_g1_i2	---NA---	uncharacterized protein LOC111127142	0.752322
TRINITY_DN12772_c0_g1_i1	---NA---	uncharacterized protein LOC111103224	0.751918
TRINITY_DN50860_c0_g2_i2	K07508	3-ketoacyl-CoA thiolase, mitochondrial	0.751741
TRINITY_DN63952_c0_g1_i1	K09035	transcription factor MafB-like	0.75166
TRINITY_DN67751_c0_g1_i2	---NA---	endonuclease/reverse transcriptase	0.751555
TRINITY_DN67367_c0_g1_i1	---NA---	prosaposin-like	0.751385
TRINITY_DN105685_c0_g1_i1	---NA---	UPF0462 protein C4orf33 homolog	0.75075
TRINITY_DN61375_c0_g1_i2	K20123	protein kinase C and casein kinase substrate in neurons protein 1-like	0.749964
TRINITY_DN61801_c0_g1_i1	---NA---	uncharacterized protein LOC111107308	0.748002
TRINITY_DN68828_c2_g1_i4	---NA---	putative DNA polymerase	0.744239
TRINITY_DN75941_c0_g1_i1	---NA---	Mastermind-like protein 1	0.74369
TRINITY_DN60341_c1_g5_i1	---NA---	predicted protein	0.743169
TRINITY_DN65593_c0_g1_i1	K11141	glutamyl aminopeptidase-like	0.741883
TRINITY_DN54554_c0_g1_i1	---NA---	FMRFamide receptor-like	0.741829
TRINITY_DN1769_c0_g1_i1	---NA---	protein shisa-5-like	0.741829
TRINITY_DN52506_c0_g1_i1	K15100	tricarboxylate transport protein, mitochondrial-like	0.737642
TRINITY_DN36472_c0_g1_i1	---NA---	hypothetical protein CGI_10020949	0.737583
TRINITY_DN29086_c1_g2_i1	K00657	diamine acetyltransferase 2-like	0.736241
TRINITY_DN50073_c0_g2_i1	---NA---	heat shock 70 kDa protein 12B-like	0.735975
TRINITY_DN55982_c0_g1_i1	---NA---	E3 ubiquitin/ISG15 ligase TRIM25-like	0.735325
TRINITY_DN66677_c1_g1_i3	---NA---	DUF4190 domain-containing protein	0.735304
TRINITY_DN58564_c1_g3_i1	---NA---	ATP-dependent RNA helicase HrpA	0.734185
TRINITY_DN64213_c1_g1_i2	---NA---	uncharacterized protein LOC110463324	0.733393
TRINITY_DN38146_c0_g1_i1	K00022	l-3-hydroxyacyl-coenzyme a dehydrogenase, short chain	0.732574
TRINITY_DN21652_c0_g1_i1	---NA---	zinc finger protein 609-like	0.732554
TRINITY_DN67933_c3_g3_i3	K02685	DNA primase large subunit-like	0.732274
TRINITY_DN68607_c1_g11_i4	K08051	pleckstrin homology domain-containing family A member 8-like	0.731332
TRINITY_DN62094_c0_g1_i1	K13926	ATP-binding cassette sub-family A member 7-like	0.730119
TRINITY_DN38061_c0_g1_i1	K23205	THAP domain-containing protein 4-like	0.729249
TRINITY_DN64324_c0_g1_i1	---NA---	uncharacterized protein LOC110464692	0.726721
TRINITY_DN66405_c1_g7_i1	---NA---	SID1 transmembrane family member 1-like	0.725624
TRINITY_DN49375_c0_g1_i1	K02133	ATP synthase subunit beta, mitochondrial-like	0.7251
TRINITY_DN66999_c0_g1_i1	K05477	tumor necrosis factor	0.724472
TRINITY_DN76856_c0_g1_i1	K23379	extracellular matrix protein FRAS1	0.72429
TRINITY_DN67684_c2_g7_i1	K06867	E3 ubiquitin-protein ligase MIB2-like	0.722285
TRINITY_DN48994_c0_g1_i1	---NA---	cerebellar degeneration-related protein 2-like	0.722188
TRINITY_DN113658_c0_g1_i1	K07554	ATP synthase subunit s, mitochondrial-like	0.72202
TRINITY_DN68564_c1_g1_i1	---NA---	uncharacterized protein LOC111118283	0.721818
TRINITY_DN68854_c1_g2_i1	---NA---	sushi, von Willebrand factor type A, EGF and pentraxin domain-containing protein 1-like	0.721473
TRINITY_DN35689_c0_g1_i1	K01285	lysosomal Pro-X carboxypeptidase-like	0.721214
TRINITY_DN58219_c0_g2_i1	K17356	tetraspanin-13-like	0.721194
TRINITY_DN78352_c0_g2_i1	---NA---	hypothetical protein LOTGIDRAFT_203715	0.720568
TRINITY_DN50849_c0_g2_i1	---NA---	major facilitator superfamily domain-containing protein 12-like	0.720568
TRINITY_DN69927_c0_g1_i1	---NA---	spondin-1-like	0.720568
TRINITY_DN13207_c0_g2_i1	K18201	hydroxylysine kinase-like	0.718831
TRINITY_DN66524_c0_g1_i2	---NA---	uncharacterized protein LOC110444201	0.718691
TRINITY_DN58964_c0_g1_i1	---NA---	protein unc-13 homolog C-like	0.718125
TRINITY_DN65328_c0_g1_i1	---NA---	Structural maintenance of chromosomes protein	0.71689
TRINITY_DN57404_c0_g1_i1	K01008	selenide, water dikinase-like	0.716696
TRINITY_DN10994_c0_g1_i1	---NA---	protein bark beetle-like	0.71605
TRINITY_DN77462_c0_g1_i1	---NA---	3-demethylubiquinone-9 3-methyltransferase	0.714277
TRINITY_DN52145_c0_g1_i1	---NA---	beta-1,4-galactosyltransferase 1-like	0.714277
TRINITY_DN77311_c0_g1_i1	---NA---	Chitin synthase 1	0.714277
TRINITY_DN91294_c0_g1_i1	K10896	Fanconi anemia group M protein	0.714277
TRINITY_DN88664_c0_g1_i1	---NA---	gamma-aminobutyric acid type B receptor subunit 2-like	0.714277
TRINITY_DN91312_c0_g1_i1	---NA---	Glutamate receptor ionotropic, kainate 2	0.714277
TRINITY_DN95405_c0_g1_i1	---NA---	multidrug resistance-associated protein 4-like	0.714277
TRINITY_DN42639_c0_g1_i1	---NA---	NADH dehydrogenase [ubiquinone] 1 beta subcomplex subunit 11, mitochondrial-like	0.714277
TRINITY_DN81391_c0_g1_i1	---NA---	nuclear receptor subfamily 1 group D member 2	0.714277
TRINITY_DN79635_c0_g1_i1	K04511	prickle-like protein 3	0.714277
TRINITY_DN77361_c0_g1_i1	---NA---	protocadherin Fat 4-like	0.714277
TRINITY_DN95469_c0_g1_i1	---NA---	putative GH3 domain-containing protein	0.714277
TRINITY_DN94226_c0_g1_i1	K01601	ribulose-bisphosphate carboxylase	0.714277
TRINITY_DN67299_c1_g1_i1	---NA---	sodium- and chloride-dependent neutral and basic amino acid transporter B(0+)-like	0.714277
TRINITY_DN64829_c12_g1_i1	---NA---	substance-K receptor-like	0.714277
TRINITY_DN78172_c0_g1_i1	---NA---	uncharacterized protein LOC111104343	0.714277
TRINITY_DN77526_c0_g1_i1	---NA---	uncharacterized protein LOC111114316	0.714277
TRINITY_DN105637_c0_g1_i1	---NA---	uncharacterized protein LOC111119200	0.714277
TRINITY_DN87045_c0_g1_i1	---NA---	zinc finger protein 260	0.714277
TRINITY_DN61326_c0_g2_i1	K12386	cystinosin-like	0.714106
TRINITY_DN66015_c8_g5_i4	---NA---	DNA-directed RNA polymerase subunit beta''-like	0.713621
TRINITY_DN68801_c0_g5_i4	---NA---	hypothetical protein CRYPA_348	0.713468
TRINITY_DN12364_c0_g1_i1	K08738	RecName: Full=Cytochrome c	0.713381
TRINITY_DN38994_c0_g1_i2	---NA---	Growth arrest and DNA damage-inducible protein GADD45 beta	0.713262
TRINITY_DN38431_c0_g1_i1	K06678	Condensin complex subunit 3	0.71246
TRINITY_DN61635_c0_g1_i2	K02207	ubiquitin-conjugating enzyme E2 R2-like	0.712172
TRINITY_DN64249_c0_g1_i1	---NA---	transmembrane protein 127	0.712108
TRINITY_DN29587_c0_g1_i1	K17966	transmembrane protein 70 homolog, mitochondrial-like	0.711514
TRINITY_DN85247_c0_g1_i1	K04596	Brain-specific angiogenesis inhibitor 3	0.710673
TRINITY_DN79203_c0_g1_i1	---NA---	general transcription factor 3C polypeptide 1-like	0.710673
TRINITY_DN76218_c0_g1_i1	K13949	prostaglandin reductase 2-like	0.710673
TRINITY_DN14386_c0_g2_i1	---NA---	renalase	0.710673
TRINITY_DN63244_c0_g1_i1	K17890	autophagy-related protein 43481	0.710012
TRINITY_DN58984_c0_g1_i1	K01889	phenylalanine--tRNA ligase, mitochondrial-like	0.709673
TRINITY_DN68591_c15_g3_i1	K22255	ATPase inhibitor mai-2, mitochondrial-like	0.707834
TRINITY_DN65186_c2_g1_i1	---NA---	Zinc finger BED domain-containing protein DAYSLEEPER	0.707338
TRINITY_DN65872_c0_g1_i1	K13093	HIV Tat-specific factor 1-like	0.707258
TRINITY_DN68330_c1_g9_i5	K13748	alpha-1,3-mannosyl-glycoprotein 4-beta-N-acetylglucosaminyltransferase C-like	0.70693
TRINITY_DN66461_c1_g1_i1	K16599	probable tubulin polyglutamylase TTLL1	0.706834
TRINITY_DN55514_c0_g1_i1	K09478	Short/branched chain specific acyl-CoA dehydrogenase, mitochondrial	0.706166
TRINITY_DN63940_c0_g1_i1	K03941	NADH dehydrogenase [ubiquinone] iron-sulfur protein 8, mitochondrial	0.706025
TRINITY_DN67940_c18_g8_i1	K00432	selenium-dependent glutathione peroxidase	0.705914
TRINITY_DN66753_c0_g1_i1	---NA---	sodium- and chloride-dependent creatine transporter 1-like	0.705335
TRINITY_DN60679_c0_g2_i1	K02684	DNA primase small subunit-like	0.705244
TRINITY_DN65834_c0_g5_i2	K12366	engulfment and cell motility protein 1-like	0.705196
TRINITY_DN62797_c1_g1_i1	K18932	probable palmitoyltransferase ZDHHC24	0.704607
TRINITY_DN62244_c0_g2_i2	---NA---	Activated RNA polymerase II transcriptional coactivator p15	0.704451
TRINITY_DN62834_c0_g1_i1	K15109	mitochondrial carnitine/acylcarnitine carrier protein	0.703632
TRINITY_DN36490_c0_g1_i1	K17402	28S ribosomal protein S23, mitochondrial-like	0.703507
TRINITY_DN47361_c0_g1_i1	K02358	elongation factor Tu, mitochondrial-like	0.702264
TRINITY_DN51220_c0_g4_i1	---NA---	hypothetical protein EGW08_003245	0.701963
TRINITY_DN66791_c0_g1_i2	K11969	potential E3 ubiquitin-protein ligase ariadne-2-like	0.701395
TRINITY_DN65798_c0_g1_i2	---NA---	collagen alpha-2(IX) chain-like	0.700508
TRINITY_DN62776_c2_g1_i2	---NA---	uncharacterized protein LOC111120476	0.698686
TRINITY_DN67542_c1_g1_i9	---NA---	uncharacterized protein LOC114335378	0.698079
TRINITY_DN66938_c5_g11_i1	K08583	calpain-B	0.697635
TRINITY_DN66944_c0_g1_i3	K00753	glycoprotein 3-alpha-L-fucosyltransferase A-like	0.697614
TRINITY_DN65723_c0_g1_i1	K02738	proteosome PSMB6/9	0.69606
TRINITY_DN67193_c4_g7_i1	K01599	uroporphyrinogen decarboxylase-like	0.695168
TRINITY_DN59739_c0_g1_i1	K03935	NADH-ubiquinone oxidoreductase 49 kDa subunit-like	0.694163
TRINITY_DN23389_c0_g1_i1	K00999	CDP-diacylglycerol--inositol 3-phosphatidyltransferase 1-like	0.693659
TRINITY_DN95138_c0_g1_i1	---NA---	Muscle M-line assembly protein unc-89	0.693659
TRINITY_DN27928_c0_g2_i1	---NA---	uncharacterized protein LOC110453353	0.693659
TRINITY_DN62361_c0_g1_i3	---NA---	uncharacterized protein LOC110455953	0.693544
TRINITY_DN62508_c0_g1_i1	---NA---	Ubiquitin-conjugating enzyme E2 6	0.693475
TRINITY_DN60769_c1_g1_i4	K00236	succinate dehydrogenase cytochrome b560 subunit, mitochondrial-like	0.691717
TRINITY_DN96563_c0_g1_i1	K10302	F-box only protein 22-like	0.691393
TRINITY_DN66526_c2_g2_i7	---NA---	uncharacterized protein LOC110463708	0.690222
TRINITY_DN65492_c8_g1_i1	K02912	ribosomal protein	0.690173
TRINITY_DN115062_c0_g1_i1	---NA---	Zinc finger FYVE domain-containing protein 26	0.689989
TRINITY_DN22739_c0_g1_i1	---NA---	ES1 protein homolog, mitochondrial-like	0.689823
TRINITY_DN66094_c0_g1_i2	---NA---	PREDICTED: uncharacterized protein LOC105849745	0.689587
TRINITY_DN51184_c0_g1_i2	K08746	very long-chain acyl-CoA synthetase	0.688781
TRINITY_DN38017_c0_g1_i1	---NA---	organic cation transporter protein-like	0.688674
TRINITY_DN55518_c0_g2_i1	K13247	lambda-crystallin-like protein	0.68842
TRINITY_DN105207_c0_g1_i1	K02140	lethal -2 6225	0.688305
TRINITY_DN50873_c0_g1_i1	K07945	ADP-ribosylation factor-like protein 4C	0.68824
TRINITY_DN104281_c0_g1_i1	---NA---	Myelin expression factor 2	0.687079
TRINITY_DN65304_c1_g2_i1	K17585	phosphatase and actin regulator 1-like	0.685763
TRINITY_DN66311_c5_g5_i1	---NA---	uncharacterized protein LOC106172318	0.685506
TRINITY_DN64695_c0_g1_i1	K08827	serine/threonine-protein kinase PRP4 homolog	0.685233
TRINITY_DN66961_c10_g5_i1	K12834	PHD finger-like domain-containing protein 5A	0.685114
TRINITY_DN67847_c5_g1_i8	---NA---	MULTISPECIES: uracil-DNA glycosylase	0.684738
TRINITY_DN45412_c0_g1_i1	---NA---	Espin	0.678688
TRINITY_DN43912_c0_g1_i1	---NA---	protein NipSnap-like	0.678088
TRINITY_DN68249_c1_g2_i1	---NA---	uncharacterized protein LOC105920141	0.6775
TRINITY_DN46100_c1_g1_i1	---NA---	TPR and ankyrin repeat-containing protein 1-like	0.675943
TRINITY_DN51959_c0_g2_i1	K07514	peroxisomal bifunctional enzyme-like	0.675777
TRINITY_DN62841_c0_g1_i2	K01513	Ectonucleotide pyrophosphatase/phosphodiesterase family member 3	0.674346
TRINITY_DN15426_c0_g1_i1	K03540	ribonuclease P protein subunit p21-like	0.671286
TRINITY_DN33198_c0_g1_i1	---NA---	PREDICTED: uncharacterized protein LOC105345832	0.670248
TRINITY_DN64755_c0_g1_i1	K06675	structural maintenance of chromosomes protein 4-like	0.670166
TRINITY_DN57051_c0_g1_i3	---NA---	uncharacterized protein YER152C-like	0.670111
TRINITY_DN4216_c0_g1_i1	---NA---	Zinc finger FYVE domain-containing protein 26	0.669274
TRINITY_DN61447_c0_g1_i1	K02210	DNA replication licensing factor mcm7	0.668951
TRINITY_DN67476_c2_g4_i3	---NA---	putative RNA-directed DNA polymerase from transposon BS	0.668371
TRINITY_DN36633_c0_g1_i1	K18418	ERI1 exoribonuclease 3	0.667716
TRINITY_DN62727_c1_g1_i4	---NA---	nuclear migration protein nudC-like	0.667221
TRINITY_DN61381_c0_g1_i2	K23691	serine/threonine-protein kinase N2	0.667214
TRINITY_DN67859_c0_g3_i2	K11275	histone	0.665759
TRINITY_DN61100_c0_g2_i1	K17383	protein sprouty homolog 2-like	0.664337
TRINITY_DN63070_c0_g1_i1	---NA---	nucleolar and coiled-body phosphoprotein 1-like	0.663662
TRINITY_DN18121_c0_g1_i1	K08791	serine/threonine-protein kinase LATS1	0.663164
TRINITY_DN67714_c4_g3_i1	---NA---	uncharacterized protein LOC111138489	0.663054
TRINITY_DN67481_c1_g1_i3	K09676	galactose-3-O-sulfotransferase 2-like	0.662982
TRINITY_DN67535_c0_g2_i1	---NA---	PREDICTED: uncharacterized protein LOC109621000	0.662943
TRINITY_DN55862_c0_g1_i1	---NA---	PiggyBac transposable element-derived protein 4	0.662422
TRINITY_DN48623_c0_g1_i1	K11412	NAD-dependent protein deacetylase sirtuin-2-like	0.662164
TRINITY_DN50614_c0_g1_i1	---NA---	hypothetical protein LOTGIDRAFT_161833	0.661053
TRINITY_DN52786_c0_g1_i1	---NA---	Potassium channel subfamily T member 2	0.661053
TRINITY_DN64011_c1_g1_i1	---NA---	PREDICTED: nephrin-like	0.661053
TRINITY_DN65593_c0_g3_i1	---NA---	glutamyl aminopeptidase	0.659781
TRINITY_DN57307_c0_g1_i1	K12235	amino acid racemase	0.659014
TRINITY_DN68988_c11_g20_i1	---NA---	receptor-type tyrosine-protein phosphatase epsilon-like	0.659014
TRINITY_DN112577_c0_g1_i1	---NA---	uncharacterized protein LOC110451260	0.6584
TRINITY_DN62220_c4_g1_i3	K13199	plasminogen activator inhibitor 1 RNA-binding protein-like	0.65816
TRINITY_DN58956_c0_g1_i1	---NA---	zonadhesin-like	0.65747
TRINITY_DN26193_c0_g1_i1	---NA---	uncharacterized protein LOC111099095	0.657395
TRINITY_DN54629_c0_g1_i1	K17495	sushi, von Willebrand factor type A, EGF and pentraxin domain-containing protein 1	0.65695
TRINITY_DN36379_c0_g1_i1	---NA---	surfeit locus protein 6 homolog	0.65674
TRINITY_DN19751_c0_g1_i1	---NA---	hypothetical protein LOTGIDRAFT_166268	0.655614
TRINITY_DN62398_c0_g1_i1	---NA---	Pol, env	0.655614
TRINITY_DN2097_c0_g1_i1	---NA---	titin	0.655614
TRINITY_DN66419_c1_g2_i1	K22594	Pogo transposable element with ZNF domain	0.655459
TRINITY_DN39969_c0_g1_i1	---NA---	spondin-1-like	0.655347
TRINITY_DN55187_c0_g1_i2	K01025	sulfotransferase 1A1-like	0.654202
TRINITY_DN32754_c0_g1_i1	K11658	tyrosine-protein kinase BAZ1B-like	0.652121
TRINITY_DN67255_c0_g1_i1	K00415	cytochrome b-c1 complex subunit 2, mitochondrial-like	0.651761
TRINITY_DN64304_c0_g2_i1	---NA---	pol-like protein	0.651699
TRINITY_DN54673_c0_g2_i1	K02132	mitochondrial H+ ATPase a subunit	0.651577
TRINITY_DN61928_c0_g1_i1	K02355	elongation factor G, mitochondrial-like	0.651265
TRINITY_DN68143_c3_g1_i4	K13649	folate receptor beta-like	0.650766
TRINITY_DN68732_c2_g8_i1	---NA---	phosphatidylinositol phosphatase PTPRQ-like	0.649303
TRINITY_DN64877_c0_g1_i2	K11275	histone 1o	0.648998
TRINITY_DN59848_c0_g2_i1	K20179	vacuolar protein sorting-associated protein 11 homolog	0.648958
TRINITY_DN25606_c0_g2_i1	K17693	DNA-binding protein inhibitor ID-2	0.648473
TRINITY_DN53117_c1_g1_i1	K07756	inositol hexakisphosphate kinase 1-like	0.64684
TRINITY_DN65948_c0_g1_i2	---NA---	protein TBRG4-like	0.646286
TRINITY_DN67432_c1_g1_i2	---NA---	placenta-specific gene 8 protein-like	0.644869
TRINITY_DN50742_c1_g1_i2	K08959	casein kinase I	0.644446
TRINITY_DN68984_c13_g1_i2	---NA---	von Willebrand factor D and EGF domain-containing protein-like	0.644333
TRINITY_DN67515_c3_g1_i1	K00128	aldehyde dehydrogenase, mitochondrial-like	0.643984
TRINITY_DN65355_c1_g1_i2	K22941	protein YIPF3-like	0.64394
TRINITY_DN68923_c1_g4_i3	---NA---	putative DNA polymerase	0.643763
TRINITY_DN6689_c0_g2_i1	K00432	glutathione peroxidase	0.642563
TRINITY_DN76587_c0_g1_i1	---NA---	E3 ubiquitin-protein ligase TRIM56-like	0.642293
TRINITY_DN66422_c0_g2_i1	K02357	elongation factor Ts, mitochondrial-like	0.641899
TRINITY_DN63263_c0_g3_i2	K18085	myotubularin-related protein 10-A-like	0.641603
TRINITY_DN56137_c0_g1_i2	K01896	Acyl-coenzyme A synthetase ACSM3, mitochondrial	0.640975
TRINITY_DN103618_c0_g1_i1	K05665	multidrug resistance-associated protein 1-like	0.640843
TRINITY_DN67921_c0_g8_i1	---NA---	mannan polymerase II complex anp1 subunit-like	0.639358
TRINITY_DN29232_c0_g1_i1	---NA---	transmembrane protein 45B-like	0.637852
TRINITY_DN50561_c0_g1_i2	K15042	importin subunit alpha-9	0.637758
TRINITY_DN63402_c1_g1_i1	---NA---	spermatogenesis-associated protein 24-like	0.637758
TRINITY_DN25002_c0_g1_i1	---NA---	PREDICTED: uncharacterized protein LOC109618342	0.637607
TRINITY_DN62205_c1_g1_i1	---NA---	uncharacterized methyltransferase-like C25B8	0.635628
TRINITY_DN18605_c0_g1_i1	---NA---	Leucine-rich repeat serine/threonine-protein kinase 1	0.634514
TRINITY_DN68724_c2_g4_i1	---NA---	uncharacterized protein LOC111133485	0.634406
TRINITY_DN67594_c5_g5_i1	K03871	von Hippel-Lindau disease tumor suppressor-like	0.633621
TRINITY_DN5048_c0_g1_i1	---NA---	uncharacterized protein LOC110447374	0.632803
TRINITY_DN66628_c0_g2_i1	---NA---	solute carrier family 23 member 1-like	0.629757
TRINITY_DN68146_c0_g1_i2	---NA---	gliding motility-associated C-terminal domain-containing protein	0.629182
TRINITY_DN68054_c2_g1_i6	---NA---	Exodeoxyribonuclease III	0.628972
TRINITY_DN58792_c0_g2_i2	K12190	vacuolar protein-sorting-associated protein 36	0.628972
TRINITY_DN68345_c2_g2_i1	---NA---	magnesium/proton exchanger 1-like	0.62765
TRINITY_DN19881_c0_g2_i1	---NA---	Solute carrier organic anion transporter family member 4A1	0.62765
TRINITY_DN97940_c0_g1_i1	---NA---	synaptotagmin-10-like	0.62765
TRINITY_DN63164_c0_g2_i1	K02541	zygotic DNA replication licensing factor mcm3	0.627615
TRINITY_DN43505_c0_g1_i1	---NA---	calmodulin-like protein 5	0.626576
TRINITY_DN67829_c3_g18_i2	---NA---	hypothetical protein LOTGIDRAFT_175274	0.626576
TRINITY_DN68800_c2_g1_i1	---NA---	glycine receptor subunit alphaZ1	0.625817
TRINITY_DN94973_c0_g1_i1	K23570	ER membrane protein complex subunit 10-like	0.6256
TRINITY_DN49419_c0_g1_i1	K17582	flocculation protein FLO11-like	0.625387
TRINITY_DN55495_c0_g1_i2	K11253	Histone H3	0.624723
TRINITY_DN21003_c0_g1_i1	---NA---	Cubilin	0.623541
TRINITY_DN60441_c0_g1_i2	K10226	fatty acid desaturase 5a	0.622182
TRINITY_DN61464_c0_g1_i2	---NA---	rhotekin-like	0.622102
TRINITY_DN66386_c12_g4_i1	---NA---	heat shock 70 kDa protein 12B	0.621648
TRINITY_DN67982_c13_g1_i1	---NA---	mucin-5AC-like	0.621504
TRINITY_DN62803_c0_g1_i1	K07565	60S ribosome subunit biogenesis protein NIP7 homolog	0.620267
TRINITY_DN24591_c0_g1_i1	---NA---	vacuolar protein 8-like	0.619737
TRINITY_DN27984_c0_g1_i1	K04453	protein max-like	0.619355
TRINITY_DN66878_c1_g6_i2	---NA---	tRNA (cytosine(34)-C(5))-methyltransferase-like	0.619306
TRINITY_DN33565_c0_g1_i1	---NA---	otopetrin-2-like	0.618938
TRINITY_DN52694_c0_g1_i1	K12968	Double-stranded RNA-specific adenosine deaminase	0.618874
TRINITY_DN68712_c1_g5_i2	K14834	nucleolar complex protein 3 homolog	0.618874
TRINITY_DN51663_c0_g2_i1	K15414	complement component 1 Q subcomponent-binding protein, mitochondrial-like	0.618401
TRINITY_DN24507_c0_g1_i2	---NA---	protein PLANT CADMIUM RESISTANCE 3	0.61746
TRINITY_DN68983_c10_g10_i4	---NA---	Tripartite motif-containing protein 3	0.616458
TRINITY_DN49211_c0_g2_i1	---NA---	uncharacterized protein LOC110449299	0.614813
TRINITY_DN37547_c0_g1_i1	---NA---	PREDICTED: uncharacterized protein LOC105336126	0.614791
TRINITY_DN98277_c0_g1_i1	---NA---	hypothetical protein KP79_PYT12354	0.614177
TRINITY_DN76052_c0_g1_i1	---NA---	Laminin subunit beta-2	0.614177
TRINITY_DN866_c0_g2_i1	---NA---	zinc finger protein 862-like	0.614177
TRINITY_DN66764_c0_g1_i1	---NA---	Zonadhesin	0.61248
TRINITY_DN54394_c0_g1_i1	K00261	glutamate dehydrogenase	0.612237
TRINITY_DN54884_c0_g2_i1	K08339	autophagy protein 5-like	0.611386
TRINITY_DN40061_c0_g1_i1	---NA---	uncharacterized protein LOC110465860	0.610263
TRINITY_DN64840_c0_g1_i2	---NA---	hypothetical protein KP79_PYT03288	0.60709
TRINITY_DN15268_c0_g2_i1	---NA---	hypothetical protein LOTGIDRAFT_229613	0.606299
TRINITY_DN61632_c4_g1_i2	---NA---	nucleolar protein 16	0.606299
TRINITY_DN61659_c0_g1_i1	K08752	fatty acid-binding protein, heart-like	0.605974
TRINITY_DN68147_c0_g1_i1	K09569	FK506 binding protein 2 S homeolog precursor	0.605532
TRINITY_DN53276_c0_g1_i1	K11434	Protein arginine N-methyltransferase 1	0.605308
TRINITY_DN64579_c0_g1_i1	---NA---	Tcoingi protein-like protein	0.605091
TRINITY_DN57181_c0_g1_i2	K11538	isobutyryl-CoA dehydrogenase, mitochondrial-like	0.603933
TRINITY_DN27791_c0_g1_i1	K22765	transmembrane protein 237-like	0.601723
TRINITY_DN62460_c0_g1_i1	---NA---	probable iron/ascorbate oxidoreductase DDB_G0283291	0.601051
TRINITY_DN96577_c0_g1_i1	---NA---	transmembrane protein 128-like	0.600815
TRINITY_DN12773_c0_g1_i1	---NA---	chondroitin sulfate proteoglycan 4	0.600732
TRINITY_DN68935_c10_g3_i3	---NA---	uncharacterized protein LOC111102491	0.60049
TRINITY_DN63460_c0_g2_i2	---NA---	kelch-like protein 40	0.599659
TRINITY_DN57166_c0_g4_i1	---NA---	cadherin-related tumor suppressor-like	0.598414
TRINITY_DN76481_c0_g1_i1	---NA---	uncharacterized protein LOC112555073	0.598414
TRINITY_DN62840_c2_g1_i1	K17266	major vault protein-like	0.598304
TRINITY_DN103792_c0_g1_i1	K16815	calcium-independent phospholipase A2-gamma-like	0.598235
TRINITY_DN65082_c0_g1_i1	---NA---	slit homolog 1 protein	0.598199
TRINITY_DN68799_c0_g2_i3	K18405	tudor domain-containing protein 7	0.598038
TRINITY_DN53354_c0_g1_i2	K13128	zinc finger CCHC domain-containing protein 8-like	0.598038
TRINITY_DN36456_c0_g2_i1	---NA---	uncharacterized protein LOC110441652	0.597716
TRINITY_DN65672_c0_g2_i1	---NA---	innexin unc-9-like	0.597034
TRINITY_DN51300_c0_g1_i2	---NA---	tensin-like	0.595463
TRINITY_DN65661_c1_g1_i1	---NA---	52 kDa repressor of the inhibitor of the protein kinase-like	0.594741
TRINITY_DN48517_c0_g1_i1	---NA---	opioid growth factor receptor-like protein 1	0.594741
TRINITY_DN40385_c0_g2_i1	K04565	superoxide dismutase	0.59458
TRINITY_DN61356_c1_g1_i1	K03934	NADH-ubiquinone oxidoreductase 75 kDa subunit, mitochondrial-like	0.594188
TRINITY_DN63431_c0_g1_i2	K16336	Syndecan	0.594172
TRINITY_DN66494_c0_g2_i1	---NA---	ATP-dependent RNA helicase DEAH12, chloroplastic-like	0.594105
TRINITY_DN41362_c1_g1_i1	---NA---	uncharacterized protein LOC110457341	0.593968
TRINITY_DN68961_c12_g1_i1	---NA---	hypothetical protein BSL78_25062	0.593375
TRINITY_DN36055_c0_g2_i1	K19553	homeobox protein AKR-like	0.5929
TRINITY_DN57036_c0_g4_i1	---NA---	T-complex protein 1 subunit delta-like	0.592214
TRINITY_DN68675_c4_g10_i1	---NA---	hypothetical protein LOTGIDRAFT_237645	0.592028
TRINITY_DN54078_c0_g1_i2	K10252	beta,beta-carotene 15,15'-dioxygenase	0.592015
TRINITY_DN27082_c0_g1_i1	K09650	presenilins-associated rhomboid-like protein, mitochondrial	0.591624
TRINITY_DN62120_c0_g2_i2	K16056	protein orai-2-like	0.591624
TRINITY_DN62964_c0_g1_i1	K06890	protein lifeguard 3-like	0.591602
TRINITY_DN68982_c18_g3_i1	---NA---	tripartite motif-containing protein 2-like	0.591006
TRINITY_DN63922_c0_g2_i2	---NA---	basic salivary proline-rich protein 2-like	0.589454
TRINITY_DN22387_c0_g1_i1	K03964	NADH dehydrogenase [ubiquinone] 1 beta subcomplex subunit 8, mitochondrial-like	0.588903
TRINITY_DN65722_c0_g2_i6	K12900	serine/arginine-rich splicing factor 10-like	0.588859
TRINITY_DN77709_c0_g1_i1	K01596	Phosphoenolpyruvate carboxykinase [GTP]	0.588442
TRINITY_DN46910_c0_g1_i1	K12391	AP-1 complex subunit gamma-1-like	0.588441
TRINITY_DN63787_c0_g1_i1	K12598	superkiller viralicidic activity 2-like 2	0.588378
TRINITY_DN68170_c1_g1_i1	---NA---	helicase with zinc finger domain 2-like	0.58797
TRINITY_DN42644_c0_g1_i1	---NA---	PREDICTED: uncharacterized protein LOC105344583	0.587791
TRINITY_DN66506_c0_g2_i1	K02580	nuclear factor NF-kappa-B p105 subunit-like	0.58771
TRINITY_DN58351_c0_g2_i2	K19721	collagen alpha-1(II) chain-like	0.587638
TRINITY_DN65166_c0_g1_i3	---NA---	hypothetical protein C0Q70_20070	0.587402
TRINITY_DN54531_c0_g1_i1	K16174	28S ribosomal protein S18b, mitochondrial	0.586507
TRINITY_DN61741_c2_g1_i1	K01738	cysteine synthase 1-like	0.586239
TRINITY_DN63663_c4_g1_i1	K08701	ecdysone-inducible protein E75-like	0.585252
TRINITY_DN66933_c0_g1_i1	---NA---	low-density lipoprotein receptor-related protein 1B-like	0.58493
TRINITY_DN57879_c0_g2_i1	K02857	rhomboid-related protein 2-like	0.58493
TRINITY_DN44643_c0_g1_i1	K04640	guanine nucleotide-binding protein G(o) subunit alpha-like	0.584734
TRINITY_DN64372_c0_g1_i1	---NA---	reverse transcriptase family protein	0.584276
TRINITY_DN88138_c0_g1_i1	---NA---	acyl-coenzyme A synthetase ACSM3, mitochondrial	0.584194
TRINITY_DN79769_c0_g1_i1	K01756	adenylosuccinate lyase	0.584194
TRINITY_DN114059_c0_g1_i1	---NA---	anaphase-promoting complex subunit 1-like	0.584194
TRINITY_DN72277_c0_g1_i1	---NA---	bis(5'-adenosyl)-triphosphatase enpp4-like	0.584194
TRINITY_DN112074_c0_g1_i1	K22670	Bone morphogenetic protein 10	0.584194
TRINITY_DN69314_c0_g1_i1	---NA---	Carboxyl-terminal PDZ ligand of neuronal nitric oxide synthase	0.584194
TRINITY_DN84881_c0_g1_i1	K14402	cleavage and polyadenylation specificity factor subunit 2-like	0.584194
TRINITY_DN69010_c0_g1_i1	---NA---	Down syndrome cell adhesion molecule homolog	0.584194
TRINITY_DN113841_c0_g1_i1	---NA---	FAD-dependent oxidoreductase	0.584194
TRINITY_DN87233_c0_g1_i1	---NA---	FERM domain-containing protein 7-like	0.584194
TRINITY_DN88888_c0_g1_i1	K07847	GTP-binding protein GEM-like	0.584194
TRINITY_DN109078_c0_g1_i1	---NA---	lipase ZK262	0.584194
TRINITY_DN85608_c0_g1_i1	---NA---	mannosyl phosphorylinositol ceramide synthase SUR1	0.584194
TRINITY_DN103228_c0_g1_i1	---NA---	neurocalcin-delta	0.584194
TRINITY_DN107642_c0_g1_i1	---NA---	neuronal acetylcholine receptor subunit alpha-6	0.584194
TRINITY_DN66530_c2_g1_i1	---NA---	pleckstrin homology domain-containing family F member 2-like	0.584194
TRINITY_DN115059_c0_g1_i1	---NA---	PREDICTED: uncharacterized protein F54H12	0.584194
TRINITY_DN12529_c0_g1_i1	K16732	protein regulator of cytokinesis 1-like	0.584194
TRINITY_DN73280_c0_g1_i1	---NA---	Protein SpAN	0.584194
TRINITY_DN95872_c0_g1_i1	---NA---	putative neural-cadherin 2	0.584194
TRINITY_DN101656_c0_g1_i1	K01783	ribulose-phosphate 3-epimerase	0.584194
TRINITY_DN76460_c0_g1_i1	K06660	serine/threonine-protein kinase PLK1	0.584194
TRINITY_DN19881_c0_g3_i1	K14354	solute carrier organic anion transporter family member 4A1-like	0.584194
TRINITY_DN68578_c1_g7_i1	---NA---	uncharacterized protein LOC106171721	0.584194
TRINITY_DN71893_c0_g1_i1	---NA---	uncharacterized protein LOC110017230	0.584194
TRINITY_DN107169_c0_g1_i1	---NA---	uncharacterized protein LOC110453985	0.584194
TRINITY_DN64431_c1_g1_i1	---NA---	uncharacterized protein LOC111122976	0.584194
TRINITY_DN41057_c0_g1_i1	---NA---	YSIRK-type signal peptide-containing protein	0.584194
TRINITY_DN7823_c0_g1_i1	---NA---	Zinc finger FYVE domain-containing protein	0.584194
TRINITY_DN34758_c0_g1_i1	---NA---	Zinc finger FYVE domain-containing protein 26	0.584194
TRINITY_DN48480_c0_g2_i2	K08291	G protein-coupled receptor kinase 5-like	0.584035
TRINITY_DN65142_c8_g4_i1	K14379	tartrate-resistant acid phosphatase type 5	0.584035
TRINITY_DN29505_c0_g1_i2	---NA---	DNA repair protein RAD5B-like	0.582777
TRINITY_DN12809_c0_g2_i2	---NA---	PREDICTED: uncharacterized protein LOC105326097	0.582777
TRINITY_DN18415_c0_g1_i1	---NA---	probable low affinity copper uptake protein 2	0.582777
TRINITY_DN59396_c0_g1_i1	K17495	uncharacterized protein LOC106155583	0.582678
TRINITY_DN66417_c4_g1_i1	---NA---	tubulin polymerization-promoting protein family member 2-like	0.581767
TRINITY_DN66029_c0_g1_i1	K18587	Ubiquinone biosynthesis protein COQ9, mitochondrial	0.581381
TRINITY_DN45865_c0_g1_i1	K00485	dimethylaniline monooxygenase [N-oxide-forming] 5-like	0.581293
TRINITY_DN68824_c4_g4_i4	---NA---	carcinoembryonic antigen-related cell adhesion molecule 5-like	0.580747
TRINITY_DN62806_c1_g1_i2	K02898	60S ribosomal protein L26	0.58061
TRINITY_DN48572_c0_g2_i1	K10599	pre-mRNA-processing factor 19-like	0.580449
TRINITY_DN68969_c2_g1_i8	---NA---	retrotransposon-like family member retr-1	0.580149
TRINITY_DN68981_c3_g2_i2	---NA---	hypothetical protein	0.579926
TRINITY_DN63993_c2_g1_i1	K00025	cytosolic malate dehydrogenase	0.579641
TRINITY_DN62347_c0_g1_i2	K15837	G-protein-signaling modulator 2-like	0.579418
TRINITY_DN67594_c3_g1_i1	---NA---	nucleic acid dioxygenase ALKBH1-like	0.579155
TRINITY_DN38246_c0_g1_i1	---NA---	Toll-like receptor f	0.579096
TRINITY_DN95301_c0_g1_i1	K11490	condensin-2 complex subunit H2-like	0.577729
TRINITY_DN56943_c0_g3_i1	---NA---	cytochrome p450	0.576356
TRINITY_DN8393_c0_g1_i1	K23379	extracellular matrix protein FRAS1-like	0.576356
TRINITY_DN112901_c0_g1_i1	---NA---	integral membrane protein GPR155-like	0.576356
TRINITY_DN66299_c1_g3_i5	---NA---	brain tumor protein-like	0.576114
TRINITY_DN59091_c0_g1_i1	---NA---	kelch-like protein 3	0.575816
TRINITY_DN63739_c1_g2_i1	---NA---	toll-like receptor 4	0.575587
TRINITY_DN65857_c1_g3_i1	K14445	solute carrier family 13 member 2-like	0.575463
TRINITY_DN65709_c0_g4_i1	K06669	structural maintenance of chromosomes protein 3-like	0.575373
TRINITY_DN67371_c2_g2_i1	---NA---	myb-like protein A	0.573715
TRINITY_DN64710_c9_g18_i1	K12626	U6 snRNA-associated Sm-like protein LSm7	0.571589
TRINITY_DN59941_c0_g1_i1	K23284	C1q domain-containing protein DC31	0.570463
TRINITY_DN63655_c0_g1_i1	K15537	alkylglycerol monooxygenase	0.565488
TRINITY_DN44408_c0_g1_i1	---NA---	PREDICTED: uncharacterized protein LOC106817620	0.565064
TRINITY_DN62817_c0_g2_i3	K11975	probable E3 ubiquitin-protein ligase RNF144A	0.564376
TRINITY_DN65203_c4_g3_i4	K11725	phospholysine phosphohistidine inorganic pyrophosphate phosphatase-like	0.563566
TRINITY_DN64601_c0_g1_i1	---NA---	predicted protein	0.563329
TRINITY_DN67791_c0_g2_i4	---NA---	probable JmjC domain-containing histone demethylation protein 2C	0.563014
TRINITY_DN67367_c0_g3_i1	K12382	prosaposin-like	0.562396
TRINITY_DN49031_c0_g1_i1	K11503	centromere protein K-like	0.56231
TRINITY_DN40277_c1_g1_i1	K15167	Mediator of RNA polymerase II transcription subunit 24	0.562199
TRINITY_DN45791_c0_g1_i1	---NA---	phosphoribosyl pyrophosphate synthase-associated protein 1-like	0.562093
TRINITY_DN54859_c0_g2_i1	---NA---	carboxypeptidase CPVL	0.561917
TRINITY_DN57986_c0_g3_i1	K01315	plasminogen precursor	0.561877
TRINITY_DN62545_c0_g3_i1	---NA---	tripartite motif-containing protein 2-like	0.561862
TRINITY_DN66134_c4_g5_i2	---NA---	GPALPP motifs-containing protein 1	0.561232
TRINITY_DN61592_c0_g1_i1	K08548	nuclear receptor subfamily 2 group F member 1-A-like	0.560291
TRINITY_DN4196_c0_g1_i1	K06632	wee1-like protein kinase 1-A	0.560117
TRINITY_DN67229_c1_g2_i2	---NA---	hypothetical protein KP79_PYT23030	0.559728
TRINITY_DN67460_c0_g1_i1	K15731	CTD small phosphatase-like protein	0.558524
TRINITY_DN33265_c0_g1_i1	K22063	iron-sulfur cluster assembly 1 homolog, mitochondrial-like	0.558524
TRINITY_DN10577_c0_g1_i1	---NA---	tctex1 domain-containing protein 1-like	0.558388
TRINITY_DN113504_c0_g1_i1	---NA---	zinc finger protein 507	0.558388
TRINITY_DN46417_c0_g4_i1	---NA---	phosphoenolpyruvate synthase	0.558244
TRINITY_DN56614_c0_g1_i1	K04994	mucolipin-3-like	0.558128
TRINITY_DN66878_c1_g1_i1	---NA---	tRNA (cytosine(34)-C(5))-methyltransferase-like	0.554962
TRINITY_DN34721_c0_g1_i1	K03124	transcription initiation factor IIB-like	0.554711
TRINITY_DN67702_c1_g1_i1	---NA---	muscle M-line assembly protein unc-89-like	0.554412
TRINITY_DN60267_c0_g1_i1	K09206	Krueppel-like factor 5	0.5527
TRINITY_DN47725_c0_g1_i1	---NA---	phosphoenolpyruvate synthase	0.552689
TRINITY_DN63537_c0_g3_i3	K01897	long-chain-fatty-acid--CoA ligase 1-like	0.551493
TRINITY_DN67251_c0_g6_i1	K09488	heat shock protein 75 kDa, mitochondrial-like	0.551426
TRINITY_DN65097_c0_g2_i1	---NA---	katanin p80 WD40 repeat-containing subunit B1-like	0.551166
TRINITY_DN225_c0_g1_i1	K07127	5-hydroxyisourate hydrolase-like	0.550991
TRINITY_DN46965_c0_g1_i1	---NA---	calmodulin	0.550991
TRINITY_DN48278_c0_g1_i1	K12827	splicing factor 3A subunit 3-like	0.550026
TRINITY_DN54906_c0_g1_i1	K14291	phosphorylated adapter RNA export protein-like	0.54939
TRINITY_DN61987_c1_g2_i2	K00311	electron transfer flavoprotein-ubiquinone oxidoreductase, mitochondrial-like	0.549057
TRINITY_DN67104_c2_g1_i1	---NA---	hypothetical protein AC249_AIPGENE22499	0.548879
TRINITY_DN43890_c0_g1_i1	---NA---	glomulin-like	0.548521
TRINITY_DN64789_c0_g1_i1	K00031	isocitrate dehydrogenase [NADP], mitochondrial-like	0.548513
TRINITY_DN59628_c0_g5_i1	K02929	60S ribosomal protein L44-like	0.547345
TRINITY_DN62696_c0_g6_i1	K07393	Glutathionyl-hydroquinone reductase YqjG	0.546874
TRINITY_DN67471_c0_g3_i1	---NA---	uncharacterized protein LOC110454292	0.546705
TRINITY_DN61142_c0_g1_i1	K09095	hypoxia inducible factor-1alpha	0.545912
TRINITY_DN37036_c0_g1_i1	---NA---	PREDICTED: uncharacterized protein LOC105338374	0.542846
TRINITY_DN66893_c2_g1_i1	K14538	Guanine nucleotide-binding protein-like 3-like protein	0.54266
TRINITY_DN68394_c0_g4_i1	---NA---	hypothetical protein AM593_02916, partial	0.542433
TRINITY_DN60202_c0_g1_i1	---NA---	U3 small nucleolar ribonucleoprotein protein MPP10	0.541378
TRINITY_DN24156_c0_g1_i1	---NA---	TNFAIP3-interacting protein 1	0.540911
TRINITY_DN94298_c0_g1_i1	K18169	tetratricopeptide repeat protein 19, mitochondrial-like	0.539967
TRINITY_DN75916_c0_g1_i1	---NA---	zinc finger protein 850-like	0.538912
TRINITY_DN86329_c0_g1_i1	---NA---	phospholipid scramblase 1-like	0.538893
TRINITY_DN61292_c1_g1_i4	K00602	bifunctional purine biosynthesis protein PURH-like	0.537254
TRINITY_DN35186_c0_g3_i1	---NA---	F-box/LRR-repeat protein 15-like	0.537192
TRINITY_DN55248_c0_g3_i8	K17562	protein phosphatase 1 regulatory subunit 21-like	0.536181
TRINITY_DN104691_c0_g1_i1	---NA---	PREDICTED: uncharacterized protein LOC105335949	0.535087
TRINITY_DN64186_c0_g1_i2	---NA---	uncharacterized protein LOC110446237	0.535087
TRINITY_DN16820_c0_g1_i1	---NA---	disco-interacting protein 2 homolog C-like	0.534264
TRINITY_DN30029_c0_g2_i1	K00894	ethanolamine kinase 1-like	0.534264
TRINITY_DN103214_c0_g1_i1	---NA---	phosphatidylinositol-glycan-specific phospholipase D-like	0.534264
TRINITY_DN76386_c0_g1_i1	---NA---	run domain Beclin-1-interacting and cysteine-rich domain-containing protein-like	0.534264
TRINITY_DN63728_c2_g2_i1	---NA---	uncharacterized protein LOC110463003	0.533784
TRINITY_DN68716_c0_g11_i1	---NA---	uncharacterized protein LOC110450516	0.5334
TRINITY_DN51461_c0_g1_i1	K13152	zinc finger matrin-type protein 5	0.532348
TRINITY_DN39469_c0_g1_i1	K03357	anaphase-promoting complex subunit 10-like	0.53224
TRINITY_DN61788_c0_g1_i2	---NA---	PREDICTED: uncharacterized protein LOC106815062	0.53192
TRINITY_DN17962_c0_g2_i1	---NA---	zinc finger protein 436-like	0.531905
TRINITY_DN58340_c1_g4_i1	---NA---	hypothetical protein ACINNAV21_2097, partial	0.53182
TRINITY_DN104419_c0_g1_i1	K23617	acyl-CoA synthetase family member 2, mitochondrial-like	0.530921
TRINITY_DN67427_c0_g2_i1	K09497	T-complex protein 1 subunit epsilon-like	0.530846
TRINITY_DN32849_c0_g1_i1	---NA---	uncharacterized protein LOC110456014	0.530205
TRINITY_DN45734_c0_g1_i1	---NA---	F type H transporting ATPase subunit e	0.529879
TRINITY_DN37251_c0_g1_i1	---NA---	hypothetical protein KP79_PYT05597	0.529174
TRINITY_DN68951_c3_g2_i2	K20865	uncharacterized protein LOC114526168	0.529168
TRINITY_DN48498_c0_g1_i1	---NA---	death domain-containing protein CRADD-like	0.529158
TRINITY_DN68906_c3_g9_i1	---NA---	transcription intermediary factor 1-alpha-like	0.528918
TRINITY_DN115463_c0_g1_i1	---NA---	tripartite motif-containing protein	0.528518
TRINITY_DN14174_c1_g1_i1	---NA---	UDP-N-acetylglucosamine/UDP-glucose/GDP-mannose transporter	0.528518
TRINITY_DN68009_c0_g1_i1	---NA---	Retrovirus-related Pol polyprotein from transposon	0.526184
TRINITY_DN67411_c0_g1_i1	---NA---	hypothetical protein LOTGIDRAFT_175976, partial	0.525546
TRINITY_DN39029_c0_g1_i2	K09552	paraplegin	0.525057
TRINITY_DN52682_c0_g1_i1	---NA---	SERTA domain-containing protein 4	0.524708
TRINITY_DN60567_c0_g1_i2	K13291	Terminal uridylyltransferase 4	0.524424
TRINITY_DN53983_c0_g1_i1	---NA---	hypothetical protein XENTR_v90028348mg, partial	0.523808
TRINITY_DN68042_c0_g6_i2	---NA---	poly [ADP-ribose] polymerase 14-like	0.523639
TRINITY_DN34005_c0_g1_i1	---NA---	metallophosphoesterase 1 homolog	0.523469
TRINITY_DN67482_c2_g4_i1	---NA---	isochorismatase domain-containing protein 1-like	0.523148
TRINITY_DN67573_c1_g2_i2	K18616	hypothetical protein KP79_PYT21027	0.522768
TRINITY_DN66267_c1_g5_i3	K06704	disintegrin and metalloproteinase domain-containing protein 10-like	0.522637
TRINITY_DN60094_c0_g1_i1	K04393	cell division control protein 42	0.522159
TRINITY_DN68850_c1_g3_i9	---NA---	uncharacterized protein LOC106175329	0.522146
TRINITY_DN62567_c0_g1_i1	K04802	proliferating cell nuclear antigen-like	0.521869
TRINITY_DN50229_c0_g1_i1	---NA---	reverse transcriptase family protein	0.519976
TRINITY_DN36214_c0_g1_i1	---NA---	nucleolin-like	0.517826
TRINITY_DN57083_c0_g1_i1	K06091	MAGUK p55 subfamily member 5-like	0.51653
TRINITY_DN68777_c0_g1_i1	K10691	E3 ubiquitin-protein ligase UBR4	0.516499
TRINITY_DN47043_c0_g1_i3	K14556	WD repeat-containing protein 3-like	0.516126
TRINITY_DN85743_c0_g1_i1	K02995	40S ribosomal protein S8	0.515913
TRINITY_DN65771_c0_g1_i1	---NA---	hypothetical protein DIZ80_08245, partial	0.515338
TRINITY_DN66361_c0_g2_i1	---NA---	placenta-specific gene 8 protein-like	0.515161
TRINITY_DN19590_c0_g1_i1	K00166	2-oxoisovalerate dehydrogenase subunit alpha, mitochondrial-like	0.514457
TRINITY_DN57182_c0_g1_i1	K23380	FRAS1-related extracellular matrix protein 1-like	0.514197
TRINITY_DN40991_c0_g1_i1	K11656	chromatin accessibility complex protein 1-like	0.513453
TRINITY_DN68777_c0_g2_i1	K10691	E3 ubiquitin-protein ligase UBR4	0.51311
TRINITY_DN59921_c0_g2_i1	K14779	probable ATP-dependent RNA helicase DDX52	0.511788
TRINITY_DN51767_c0_g2_i1	K20630	N-chimaerin	0.511769
TRINITY_DN67024_c0_g2_i1	---NA---	CD109 antigen-like	0.511003
TRINITY_DN64671_c0_g1_i1	K14763	H/ACA ribonucleoprotein complex non-core subunit NAF1	0.510776
TRINITY_DN60385_c0_g2_i1	---NA---	mitochondrial-processing peptidase subunit beta-like	0.510065
TRINITY_DN65465_c0_g1_i1	K13345	peroxisome assembly protein 12	0.509975
TRINITY_DN52910_c2_g1_i1	---NA---	Serine/threonine-protein kinase LMTK1	0.509975
TRINITY_DN57810_c0_g2_i1	---NA---	cytochrome P450 2F3-like	0.50837
TRINITY_DN66030_c1_g4_i1	K02870	ribosomal protein L12	0.507126
TRINITY_DN51412_c0_g1_i1	---NA---	aprataxin and PNK-like factor	0.506882
TRINITY_DN65576_c2_g3_i1	---NA---	alpha-tocopherol transfer protein-like	0.506829
TRINITY_DN55687_c0_g1_i1	K00503	DBH-like monooxygenase protein 1	0.506255
TRINITY_DN64716_c2_g2_i1	---NA---	uncharacterized protein LOC110455631	0.506095
TRINITY_DN67233_c0_g1_i1	---NA---	zinc-binding domain-containing protein	0.505964
TRINITY_DN55852_c0_g1_i3	K01135	arylsulfatase B-like	0.505666
TRINITY_DN48288_c0_g2_i1	K17769	mitochondrial import receptor subunit TOM22 homolog	0.504334
TRINITY_DN26129_c0_g2_i1	---NA---	NF-kappa-B-repressing factor	0.503425
TRINITY_DN68888_c3_g1_i3	---NA---	tripartite motif-containing protein 2	0.502405
TRINITY_DN85972_c0_g1_i1	---NA---	uncharacterized protein LOC111104616	0.500568
TRINITY_DN50349_c0_g2_i1	---NA---	I-type lectin-like protein 3	0.500301
TRINITY_DN66939_c0_g1_i1	K06569	melanotransferrin-like	0.499551
TRINITY_DN15310_c0_g1_i1	K14859	suppressor of SWI4 1 homolog	0.498487
TRINITY_DN76326_c0_g1_i1	K18050	calcium-independent protein kinase C-like	0.498278
TRINITY_DN50084_c0_g1_i1	---NA---	copper oxidase	0.49532
TRINITY_DN54089_c0_g1_i1	K08731	baculoviral IAP repeat-containing protein 5-like	0.49486
TRINITY_DN67927_c0_g3_i1	---NA---	hypothetical protein LOTGIDRAFT_165489	0.49483
TRINITY_DN68392_c1_g4_i1	---NA---	polyubiquitin 3-like	0.49483
TRINITY_DN66614_c1_g2_i1	---NA---	actin, cytoplasmic 2	0.494813
TRINITY_DN51425_c0_g1_i1	K02867	39S ribosomal protein L11, mitochondrial-like	0.494712
TRINITY_DN10748_c0_g1_i1	---NA---	hypothetical protein BSL78_26839	0.493168
TRINITY_DN105318_c0_g1_i1	---NA---	S phase cyclin A-associated protein in the endoplasmic reticulum-like	0.493168
TRINITY_DN19058_c0_g1_i1	---NA---	uncharacterized protein LOC106151497	0.493168
TRINITY_DN64104_c1_g1_i3	K18024	Tyrosine-protein phosphatase non-receptor type 12	0.492019
TRINITY_DN67913_c0_g1_i1	---NA---	centrosomal protein of 290 kDa-like	0.491733
TRINITY_DN105473_c0_g1_i1	---NA---	flocculation protein FLO11	0.491395
TRINITY_DN43035_c0_g1_i2	K14686	copper transporter 2-like	0.490484
TRINITY_DN37481_c0_g1_i1	---NA---	uncharacterized protein LOC111120476	0.488939
TRINITY_DN63908_c0_g2_i1	---NA---	Myosin-IIIb	0.488916
TRINITY_DN65672_c0_g3_i2	K22037	innexin unc-9-like	0.487518
TRINITY_DN68329_c3_g5_i11	K15047	heterogeneous nuclear ribonucleoprotein U-like	0.487044
TRINITY_DN64891_c0_g1_i1	K13179	ATP-dependent RNA helicase HAS1	0.486326
TRINITY_DN67125_c0_g1_i2	K12830	splicing factor 3B subunit 3	0.48579
TRINITY_DN68201_c0_g3_i1	---NA---	Integrase/recombinase xerD-like	0.484885
TRINITY_DN56689_c0_g1_i2	K10367	protein cappuccino-like	0.484812
TRINITY_DN63833_c0_g2_i2	K10892	Fanconi anemia group E protein-like	0.484495
TRINITY_DN68000_c0_g1_i3	---NA---	DNA ligase 3-like	0.483792
TRINITY_DN9296_c0_g2_i1	K11251	histone H2A-like	0.483634
TRINITY_DN18445_c0_g1_i1	K02137	mitochondrial ATP synthase subunit OSCP-like precursor	0.482599
TRINITY_DN60617_c0_g1_i2	---NA---	mucin-17-like	0.480607
TRINITY_DN66419_c1_g3_i1	---NA---	muscle M-line assembly protein unc-89-like	0.480403
TRINITY_DN63321_c6_g9_i1	K03521	electron transfer flavoprotein subunit beta-like	0.480157
TRINITY_DN48432_c0_g2_i1	---NA---	uncharacterized protein LOC110445106	0.479728
TRINITY_DN68042_c0_g4_i1	---NA---	poly [ADP-ribose] polymerase 14-like	0.479625
TRINITY_DN62144_c0_g2_i1	---NA---	serine/threonine-protein phosphatase 6 regulatory ankyrin repeat subunit B-like	0.479533
TRINITY_DN66399_c1_g3_i1	---NA---	predicted protein	0.479114
TRINITY_DN65233_c3_g2_i2	---NA---	Extracellular matrix protein FRAS1	0.478762
[truncated: 1,718 more rows]

## Sheet: Table S4
Table S4. Genes highly expressed in the gill of of Archivesica marissinica host. (---NA--- means no annotation)
ID	KEGG	NR annotation	GFOLD (cutoff=0.01)
TRINITY_DN84767_c2_g1_i1	---NA---	SCO-spondin	10.1366
TRINITY_DN155835_c0_g1_i1	---NA---	tail fiber	9.1923
TRINITY_DN62551_c0_g1_i2	K03798	ATP-dependent metalloprotease	8.88935
TRINITY_DN118637_c0_g1_i1	K11275	histone 1o	8.67206
TRINITY_DN136116_c8_g2_i1	---NA---	von Willebrand factor type EGF and pentraxin domain-containing 1-like	8.58661
TRINITY_DN133643_c0_g2_i4	---NA---	restin homolog	8.53633
TRINITY_DN22888_c0_g2_i1	K00412	cytochrome b	8.38422
TRINITY_DN22668_c0_g1_i1	---NA---	MFS transporter	8.37748
TRINITY_DN89664_c0_g1_i1	---NA---	histidine-rich glyco -like	8.28927
TRINITY_DN56886_c0_g2_i1	---NA---	ATP synthase a chain	8.28714
TRINITY_DN46197_c0_g1_i1	K12573	ribonuclease R	8.16128
TRINITY_DN15360_c0_g1_i1	---NA---	hypothetical protein	8.09478
TRINITY_DN127227_c1_g1_i1	K11251	histone H2A-like	8.04538
TRINITY_DN126395_c0_g1_i2	K01890	phenylalanine--tRNA ligase subunit beta	7.98714
TRINITY_DN133308_c0_g1_i2	K02355	elongation factor G	7.97521
TRINITY_DN86922_c0_g1_i1	K00615	transketolase	7.89032
TRINITY_DN24290_c0_g1_i1	---NA---	pyruvate dehydrogenase	7.82087
TRINITY_DN63575_c0_g1_i1	K02519	translation initiation factor IF-2	7.67567
TRINITY_DN63241_c0_g1_i1	K04077	molecular chaperone	7.56021
TRINITY_DN90679_c1_g1_i1	K03596	elongation factor 4	7.46361
TRINITY_DN135822_c0_g1_i1	---NA---	lytic murein transglycosylase	7.45966
TRINITY_DN106037_c0_g1_i1	K01627	2-dehydro-3-deoxyphosphooctonate aldolase	7.44549
TRINITY_DN42334_c0_g1_i1	---NA---	leucyl aminopeptidase	7.43002
TRINITY_DN132120_c3_g3_i4	---NA---	Aggrecan core partial	7.41644
TRINITY_DN136116_c8_g3_i1	---NA---	PREDICTED: uncharacterized protein LOC106170487	7.37233
TRINITY_DN93077_c0_g1_i1	---NA---	heme lyase subunit	7.35676
TRINITY_DN19261_c0_g1_i1	---NA---	6-phosphofructokinase	7.35331
TRINITY_DN39415_c0_g1_i1	K00052	3-isopropylmalate dehydrogenase	7.34468
TRINITY_DN80661_c0_g1_i1	---NA---	ATP synthase subunit alpha	7.30599
TRINITY_DN21328_c0_g1_i1	K03086	RNA polymerase sigma factor	7.2762
TRINITY_DN155685_c0_g2_i1	K03072	pre translocase subunit	7.27457
TRINITY_DN142483_c0_g1_i1	K14164	glycine--tRNA ligase subunit beta	7.24424
TRINITY_DN171596_c0_g1_i1	---NA---	hypothetical protein LOTGIDRAFT_231844	7.21686
TRINITY_DN63316_c0_g1_i1	---NA---	DNA polymerase III subunit gamma tau	7.18076
TRINITY_DN112044_c0_g1_i1	---NA---	membrane partial	7.16137
TRINITY_DN122626_c0_g1_i1	---NA---	aconitate hydratase B	7.15334
TRINITY_DN40477_c0_g1_i1	K01507	sodium-translocating pyrophosphatase	7.14696
TRINITY_DN155350_c0_g1_i1	K00600	serine hydroxymethyltransferase	7.14425
TRINITY_DN69372_c0_g1_i1	K01652	acetolactate synthase	7.12234
TRINITY_DN66866_c0_g3_i1	---NA---	molecular chaperone	7.12124
TRINITY_DN63536_c0_g1_i1	---NA---	GTPase Obg	7.10456
TRINITY_DN142088_c0_g2_i1	K02256	cytochrome oxidase subunit I	7.09662
TRINITY_DN133661_c6_g3_i12	---NA---	mannan-binding lectin serine protease 1	7.08883
TRINITY_DN96765_c0_g2_i1	---NA---	segmentation paired-like	7.08079
TRINITY_DN104541_c0_g1_i1	K02469	DNA gyrase subunit A	7.06257
TRINITY_DN103630_c0_g1_i1	---NA---	neurogenic locus notch homolog 2-like	7.04648
TRINITY_DN134876_c0_g1_i1	K01672	carbonic anhydrase 2-like	7.03768
TRINITY_DN171224_c0_g1_i1	K01953	asparagine synthetase B	7.02795
TRINITY_DN38371_c0_g1_i1	K01928	UDP-N-acetylmuramoylalanyl-D-glutamate--2,6-diaminopimelate ligase	7.01755
TRINITY_DN35297_c0_g2_i1	K01845	glutamate-1-semialdehyde aminotransferase	7.0069
TRINITY_DN46412_c0_g1_i1	---NA---	glutamate synthase	6.99671
TRINITY_DN142326_c0_g1_i1	K00818	acetylornithine aminotransferase	6.9964
TRINITY_DN100909_c0_g3_i1	---NA---	PREDICTED: uncharacterized protein LOC100177838	6.95424
TRINITY_DN104385_c0_g1_i1	---NA---	beta-lactamase	6.95203
TRINITY_DN135177_c76_g2_i1	K11254	histone H4-like	6.94976
TRINITY_DN128895_c0_g1_i1	---NA---	PREDICTED: contactin-like	6.94311
TRINITY_DN45761_c0_g1_i1	K04043	molecular chaperone	6.93475
TRINITY_DN130258_c0_g1_i1	K15633	2,3-bisphosphoglycerate-independent phosphoglycerate mutase	6.9215
TRINITY_DN126390_c1_g5_i1	K00791	tRNA mitochondrial-like	6.91783
TRINITY_DN134825_c0_g2_i3	---NA---	stress response NST1-like	6.90542
TRINITY_DN61915_c0_g1_i1	---NA---	glutamine synthetase	6.90279
TRINITY_DN126599_c0_g1_i1	---NA---	predicted protein	6.88279
TRINITY_DN64169_c0_g1_i1	---NA---	DNA polymerase III subunit alpha	6.88001
TRINITY_DN142016_c0_g1_i1	K01589	5-(carboxyamino)imidazole ribonucleotide synthase	6.87446
TRINITY_DN131615_c0_g2_i1	---NA---	phosphoribosylformylglycinamidine synthase	6.87133
TRINITY_DN64289_c0_g1_i1	K03106	signal recognition particle	6.85293
TRINITY_DN103113_c0_g2_i1	---NA---	thymidylate synthase	6.84328
TRINITY_DN63204_c0_g1_i1	K17218	pyridine nucleotide-disulfide oxidoreductase	6.82844
TRINITY_DN133308_c0_g2_i1	K03046	DNA-directed RNA polymerase subunit beta	6.80338
TRINITY_DN76605_c0_g1_i1	---NA---	heme ABC transporter ATP-binding	6.78813
TRINITY_DN33000_c0_g1_i1	---NA---	ribonuclease II	6.76147
TRINITY_DN204012_c0_g1_i1	K00602	bifunctional phosphoribosylaminoimidazolecarboxamide formyltransferase inosine monophosphate cyclohydrolase	6.74002
TRINITY_DN113125_c0_g1_i1	---NA---	hypothetical protein LOTGIDRAFT_143550, partial	6.73721
TRINITY_DN113013_c0_g1_i2	---NA---	citrate transporter	6.72217
TRINITY_DN131615_c0_g1_i1	K03799	peptidase Ste24p	6.71372
TRINITY_DN89497_c0_g1_i1	K01696	tryptophan synthase subunit beta	6.71302
TRINITY_DN45825_c0_g1_i1	---NA---	1-deoxy-D-xylulose-5-phosphate synthase	6.68472
TRINITY_DN131010_c14_g2_i1	---NA---	SCO-spondin partial	6.67883
TRINITY_DN32728_c0_g1_i1	K03695	ATP-dependent Clp protease ATP-binding subunit	6.66639
TRINITY_DN72130_c0_g1_i1	K01903	succinate-- ligase subunit beta	6.6628
TRINITY_DN99182_c0_g1_i1	---NA---	Rne Rng family	6.63042
TRINITY_DN117396_c0_g3_i1	---NA---	low-density lipo receptor-related 6	6.6199
TRINITY_DN203481_c0_g1_i1	K01955	carbamoyl phosphate synthase large subunit	6.61973
TRINITY_DN204056_c0_g1_i1	K02314	DNA helicase	6.60089
TRINITY_DN104531_c0_g1_i1	---NA---	glutathione-disulfide reductase	6.58936
TRINITY_DN116208_c0_g1_i1	K00432	glutathione peroxidase-like	6.58504
TRINITY_DN107865_c0_g1_i1	K14261	aspartate aminotransferase	6.57993
TRINITY_DN133513_c4_g1_i1	---NA---	Gamma-glutamyltranspeptidase 1	6.56461
TRINITY_DN25864_c0_g2_i1	K11253	histone H3	6.55306
TRINITY_DN187576_c0_g1_i1	---NA---	phosphomethylpyrimidine synthase	6.51828
TRINITY_DN7157_c0_g1_i1	K14026	Sel1 domain-containing	6.50725
TRINITY_DN106386_c0_g1_i1	K19919	cysteine-rich venom latisemin-like	6.49913
TRINITY_DN63325_c0_g1_i1	K01338	ATP-dependent protease La	6.49622
TRINITY_DN79451_c0_g1_i1	K01609	indole-3-glycerol-phosphate synthase	6.49526
TRINITY_DN134271_c5_g8_i1	---NA---	von Willebrand factor D and EGF domain-containing -like	6.49155
TRINITY_DN33016_c0_g1_i1	K01803	triosephosphate isomerase	6.46993
TRINITY_DN4879_c0_g2_i1	K01755	argininosuccinate lyase	6.46795
TRINITY_DN116167_c0_g1_i1	K03592	peptidase U62	6.45982
TRINITY_DN187469_c0_g1_i1	K17218	pyridine nucleotide-disulfide oxidoreductase	6.45923
TRINITY_DN110986_c1_g3_i1	K10185	T-box transcription factor TBX20-like	6.45209
TRINITY_DN125734_c0_g1_i2	---NA---	Pancreatic secretory granule membrane major glyco GP2	6.43778
TRINITY_DN116372_c0_g1_i1	K01414	oligopeptidase A	6.43031
TRINITY_DN37235_c0_g1_i1	---NA---	nucleotide exchange factor	6.41988
TRINITY_DN134271_c5_g5_i20	---NA---	hypothetical protein BRAFLDRAFT_125860	6.41857
TRINITY_DN129724_c0_g1_i1	---NA---	tripartite motif-containing 2-like	6.41839
TRINITY_DN78491_c0_g3_i1	K00453	tryptophan 2,3-dioxygenase	6.4076
TRINITY_DN25793_c0_g1_i1	---NA---	aspartate-semialdehyde dehydrogenase	6.40349
TRINITY_DN98147_c0_g2_i1	K02945	30S ribosomal S1	6.39854
TRINITY_DN89200_c0_g1_i1	K00003	homoserine dehydrogenase	6.39548
TRINITY_DN121880_c0_g1_i2	---NA---	oxysterol-binding -related 11-like	6.37706
TRINITY_DN132320_c0_g1_i6	---NA---	Multiple epidermal growth factor-like domains 6	6.37597
TRINITY_DN112873_c1_g2_i1	---NA---	PQ-loop repeat-containing 1-like	6.36805
TRINITY_DN120454_c0_g2_i1	K00833	adenosylmethionine-8-amino-7-oxononanoate aminotransferase	6.35319
TRINITY_DN86352_c0_g1_i1	K06888	secreted containing DUF255	6.34875
TRINITY_DN130021_c0_g1_i1	K18752	transportin-1-like	6.34463
TRINITY_DN19984_c0_g1_i1	---NA---	tRNA (5-methylaminomethyl-2-thiouridylate)-methyltransferase	6.33814
TRINITY_DN120362_c0_g1_i2	K03070	pre translocase subunit	6.32676
TRINITY_DN121712_c2_g1_i6	---NA---	thioredoxin domain-containing 11-like	6.31655
TRINITY_DN133389_c7_g2_i1	---NA---	PREDICTED: uncharacterized protein LOC101846070	6.30106
TRINITY_DN131904_c3_g1_i3	---NA---	fibropellin-1-like	6.29098
TRINITY_DN187414_c0_g1_i1	K00930	acetylglutamate kinase	6.26885
TRINITY_DN125289_c1_g1_i1	---NA---	DNA helicase	6.26838
TRINITY_DN124847_c0_g1_i1	---NA---	Low-density lipo receptor-related 6	6.26574
TRINITY_DN135792_c0_g1_i1	---NA---	pro convertase subtilisin kexin type 4	6.2628
TRINITY_DN142075_c0_g1_i1	---NA---	DNA gyrase subunit B	6.25566
TRINITY_DN120115_c0_g1_i1	---NA---	26S proteasome non-ATPase regulatory subunit 10-like	6.21565
TRINITY_DN91015_c0_g1_i5	---NA---	hypothetical protein LOTGIDRAFT_122890, partial	6.21518
TRINITY_DN86054_c0_g2_i1	---NA---	tRNA (5-methylaminomethyl-2-thiouridylate)-methyltransferase	6.21449
TRINITY_DN146739_c0_g1_i1	K04751	nitrogen regulatory P-II 1	6.20978
TRINITY_DN142112_c0_g1_i1	---NA---	phosphoglucomutase	6.2064
TRINITY_DN131617_c0_g1_i1	---NA---	tRNA-2-methylthio-N(6)-dimethylallyladenosine synthase	6.18977
TRINITY_DN33049_c0_g1_i1	K01960	oxaloacetate decarboxylase	6.16732
TRINITY_DN103104_c0_g1_i1	---NA---	pyruvate dehydrogenase complex E2 component	6.16448
TRINITY_DN63488_c0_g2_i1	---NA---	aspartate aminotransferase	6.14555
TRINITY_DN87893_c0_g2_i3	---NA---	Avirulence s3	6.13733
TRINITY_DN100608_c0_g1_i1	---NA---	mediator of RNA polymerase II transcription subunit 12	6.1246
TRINITY_DN24411_c0_g1_i1	K04487	cysteine desulfurase	6.12079
TRINITY_DN15428_c0_g1_i1	K01599	uroporphyrinogen decarboxylase	6.10602
TRINITY_DN120495_c0_g1_i1	---NA---	hypothetical protein VITISV_015781	6.10262
TRINITY_DN187905_c0_g1_i1	K00088	IMP dehydrogenase	6.102
TRINITY_DN128573_c0_g3_i3	---NA---	neuronal acetylcholine receptor subunit alpha-9-like	6.09202
TRINITY_DN116717_c0_g1_i1	K01972	DNA ligase	6.08053
TRINITY_DN115543_c2_g1_i1	---NA---	transcription factor Sp4-like	6.07153
TRINITY_DN24120_c0_g1_i1	K01961	acetyl- carboxylase biotin carboxylase subunit	6.06987
TRINITY_DN125285_c0_g1_i2	---NA---	leucine-rich repeat serine threonine- kinase 1-like	6.05984
TRINITY_DN91603_c0_g1_i1	---NA---	nitrate reductase A subunit alpha	6.05771
TRINITY_DN91981_c0_g1_i1	---NA---	PREDICTED: countin-1-like	6.05746
TRINITY_DN96752_c0_g1_i1	K13366	n1-acetylpolyamine oxidase	6.04657
TRINITY_DN136186_c1_g2_i4	---NA---	mucin-4- partial	6.04487
TRINITY_DN123311_c0_g1_i1	---NA---	protocadherin Fat 4-like	6.03467
TRINITY_DN129416_c1_g1_i3	---NA---	PR domain zinc finger 1-like	6.02934
TRINITY_DN126760_c0_g1_i1	---NA---	DNA topoisomerase I	6.01857
TRINITY_DN79426_c0_g2_i1	---NA---	peptidase M48	6.01324
TRINITY_DN98498_c0_g1_i2	K03777	glycolate oxidase subunit	6.00899
TRINITY_DN31225_c0_g1_i1	---NA---	gamma-glutamyltranspeptidase 1-like	6.0024
TRINITY_DN134161_c8_g5_i1	---NA---	D-galacturonic acid binding lectin precursor	5.9969
TRINITY_DN101378_c0_g2_i1	K00766	anthranilate phosphoribosyltransferase	5.99496
TRINITY_DN122610_c0_g1_i1	K01315	apolipo (a)-like	5.98141
TRINITY_DN2614_c0_g1_i1	---NA---	ATP-dependent RNA helicase	5.98048
TRINITY_DN134979_c0_g1_i1	K03917	hemocyte -glutamine gamma-glutamyltransferase-like	5.97541
TRINITY_DN136392_c0_g1_i1	---NA---	family oxidoreductase	5.9582
TRINITY_DN131297_c0_g4_i1	K02482	two-component sensor histidine kinase	5.94441
TRINITY_DN116426_c0_g2_i1	K01950	NAD+ synthetase	5.9356
TRINITY_DN134288_c6_g5_i1	---NA---	PREDICTED: uncharacterized protein LOC103280454	5.93539
TRINITY_DN95797_c0_g1_i2	K01870	isoleucyl-tRNA synthetase	5.92297
TRINITY_DN63714_c0_g1_i1	---NA---	VWA domain-containing	5.91838
TRINITY_DN175334_c0_g1_i1	---NA---	macrophage receptor MARCO	5.91759
TRINITY_DN135417_c3_g1_i1	---NA---	toll-like receptor 4	5.90171
TRINITY_DN135640_c2_g1_i1	---NA---	von Willebrand factor type EGF and pentraxin domain-containing 1	5.89641
TRINITY_DN16472_c0_g2_i1	K00525	ribonucleotide-diphosphate reductase subunit alpha	5.87932
TRINITY_DN133319_c0_g1_i1	K13649	folate receptor beta-like	5.84878
TRINITY_DN115101_c1_g1_i3	---NA---	hypothetical protein LOTGIDRAFT_119646, partial	5.80023
TRINITY_DN133652_c0_g1_i1	---NA---	acyl- synthetase family member mitochondrial-like	5.78252
TRINITY_DN110243_c1_g1_i1	---NA---	zinc finger CCCH domain-containing 3-like	5.78225
TRINITY_DN97433_c0_g2_i1	K18809	toll2	5.77687
TRINITY_DN110418_c0_g1_i1	---NA---	steroid 17-alpha-hydroxylase 17,20 lyase-like	5.7676
TRINITY_DN133803_c0_g1_i1	---NA---	Sodium-coupled monocarboxylate transporter 2	5.76579
TRINITY_DN203614_c0_g1_i1	---NA---	2,3,4,5-tetrahydropyridine-2,6-dicarboxylate N-succinyltransferase	5.75829
TRINITY_DN29294_c0_g1_i1	K03655	ATP-dependent DNA helicase	5.74067
TRINITY_DN123186_c0_g1_i1	---NA---	PREDICTED: uncharacterized protein LOC105319146	5.74067
TRINITY_DN87151_c1_g2_i1	---NA---	neurofilament heavy polypeptide-like	5.74064
TRINITY_DN136186_c1_g1_i1	---NA---	fibrillin-2-like	5.73621
TRINITY_DN134914_c2_g2_i1	---NA---	Fibrillin-1	5.73175
TRINITY_DN116822_c0_g1_i1	K15376	molybdopterin molybdenumtransferase	5.72097
TRINITY_DN107763_c0_g3_i1	---NA---	PREDICTED: uncharacterized protein LOC105345100	5.72097
TRINITY_DN118239_c0_g1_i1	---NA---	Voltage-gated hydrogen channel 1	5.69821
TRINITY_DN86340_c0_g1_i1	---NA---	DNA polymerase I	5.68074
TRINITY_DN121898_c0_g1_i2	---NA---	ATP-dependent RNA helicase	5.66709
TRINITY_DN104308_c1_g1_i1	K14720	zinc transporter ZIP14-like	5.66709
TRINITY_DN130774_c0_g3_i1	---NA---	electron transporter	5.66021
TRINITY_DN80951_c0_g1_i2	K09317	homeobox EMX1-like	5.66021
TRINITY_DN39655_c0_g1_i1	---NA---	Os03g0780550, partial	5.65659
TRINITY_DN103749_c0_g1_i1	---NA---	diaminopimelate decarboxylase	5.6415
TRINITY_DN188566_c0_g1_i1	K00800	3-phosphoshikimate 1-carboxyvinyltransferase	5.64145
TRINITY_DN45747_c0_g1_i1	K01409	N(6)-L-threonylcarbamoyladenine synthase	5.63937
TRINITY_DN66010_c0_g1_i2	---NA---	Kyphoscoliosis peptidase	5.63236
TRINITY_DN25897_c0_g1_i1	---NA---	acriflavin resistance	5.62819
TRINITY_DN132030_c1_g1_i1	---NA---	multiple epidermal growth factor-like domains 6	5.61994
TRINITY_DN135939_c5_g1_i1	---NA---	Tubulin beta-2C chain	5.61822
TRINITY_DN2710_c0_g1_i1	K03628	transcription termination factor Rho	5.60397
TRINITY_DN135939_c7_g1_i1	---NA---	XTP3TPA-transactivated 1	5.60216
TRINITY_DN132030_c0_g1_i2	---NA---	multiple epidermal growth factor-like domains 10	5.60031
TRINITY_DN130650_c0_g3_i2	---NA---	SEC14 2	5.59848
TRINITY_DN136114_c0_g1_i1	---NA---	PREDICTED: uncharacterized protein LOC105348718	5.58255
TRINITY_DN65105_c0_g2_i1	K00057	glycerol-3-phosphate dehydrogenase	5.575
TRINITY_DN130066_c1_g4_i2	---NA---	histidine kinase	5.575
TRINITY_DN142212_c0_g1_i1	---NA---	acriflavin resistance	5.56944
TRINITY_DN62754_c0_g1_i2	---NA---	glutamate synthase	5.56801
TRINITY_DN130420_c0_g1_i4	---NA---	ceramide synthase 4- partial	5.5583
TRINITY_DN134914_c2_g4_i4	---NA---	unnamed protein product	5.55677
TRINITY_DN48573_c0_g2_i1	---NA---	thiol oxidoreductase	5.55288
TRINITY_DN98878_c0_g1_i1	K01887	arginyl-tRNA synthetase	5.54543
TRINITY_DN123673_c0_g1_i1	---NA---	amidophosphoribosyltransferase	5.52821
TRINITY_DN134368_c0_g1_i1	K16669	Protocadherin Fat 4	5.50678
TRINITY_DN131381_c2_g1_i1	---NA---	FRAS1-related extracellular matrix 2-like	5.48527
TRINITY_DN93077_c1_g1_i1	---NA---	siroheme synthase	5.48442
TRINITY_DN24135_c0_g1_i1	K03701	excinuclease ABC subunit A	5.47661
TRINITY_DN134881_c11_g2_i1	---NA---	Sal 1	5.47661
TRINITY_DN132963_c0_g1_i1	K00213	7-dehydrocholesterol reductase-like	5.44759
TRINITY_DN129486_c0_g2_i4	---NA---	CUB and sushi domain-containing 3-like	5.4442
TRINITY_DN102789_c0_g2_i1	---NA---	dentin sialophospho -like	5.43464
TRINITY_DN133598_c0_g1_i5	---NA---	PREDICTED: sacsin-like	5.42612
TRINITY_DN134439_c1_g2_i1	---NA---	Large neutral amino acids transporter small subunit 1	5.42074
TRINITY_DN103022_c0_g1_i1	K01962	acetyl- carboxylase carboxyltransferase subunit alpha	5.40436
TRINITY_DN129608_c0_g1_i1	K04753	cell division	5.39308
TRINITY_DN119639_c0_g2_i2	K20989	urea-proton symporter DUR3-like	5.38805
TRINITY_DN41221_c0_g1_i1	---NA---	chorismate synthase	5.37944
TRINITY_DN132824_c1_g1_i1	---NA---	solute carrier family 28 member 3-like	5.36257
TRINITY_DN25778_c0_g1_i1	---NA---	exodeoxyribonuclease I	5.35162
TRINITY_DN124847_c0_g2_i1	K20051	Low-density lipo receptor-related 6	5.35003
TRINITY_DN127490_c1_g1_i1	---NA---	beta-1,4-mannosyltransferase egh-like	5.32522
TRINITY_DN131820_c0_g2_i3	---NA---	proline-rich nuclear receptor coactivator 2	5.30058
TRINITY_DN126466_c0_g1_i1	---NA---	Low-density lipo receptor-related 6	5.29172
TRINITY_DN122565_c0_g1_i1	---NA---	cytochrome oxidase assembly	5.29157
TRINITY_DN135956_c0_g3_i1	---NA---	PREDICTED: uncharacterized protein LOC106040825	5.28833
TRINITY_DN135907_c2_g2_i1	K16358	leucine-rich repeat and fibronectin type III domain-containing 1	5.28421
TRINITY_DN105363_c0_g1_i1	---NA---	PREDICTED: uncharacterized protein LOC105334990	5.27975
TRINITY_DN133416_c0_g2_i7	K06767	Down syndrome cell adhesion molecule homolog	5.26
TRINITY_DN132239_c2_g1_i1	---NA---	CUB and sushi domain-containing 3-like	5.25532
TRINITY_DN135308_c2_g1_i2	---NA---	PREDICTED: uncharacterized protein LOC106675215	5.24939
TRINITY_DN80295_c0_g1_i1	---NA---	hypothetical protein BRAFLDRAFT_73401	5.22804
TRINITY_DN133019_c0_g1_i1	---NA---	cell death abnormality 1-like	5.21569
TRINITY_DN123311_c2_g1_i1	---NA---	protocadherin Fat 4-like	5.20692
TRINITY_DN133319_c0_g2_i1	K13649	folate receptor beta-like	5.19183
TRINITY_DN123311_c1_g3_i1	---NA---	protocadherin Fat 4	5.18226
TRINITY_DN115731_c0_g2_i1	K01924	UDP-N-acetylmuramate--L-alanine ligase	5.18226
TRINITY_DN204119_c0_g1_i1	---NA---	ATP-dependent Clp protease ATP-binding subunit	5.17263
TRINITY_DN123460_c2_g1_i1	---NA---	tripartite motif-containing 45-like	5.17263
TRINITY_DN133513_c3_g2_i3	K18592	gamma-glutamyltranspeptidase 1-like	5.17216
TRINITY_DN109415_c0_g1_i1	---NA---	phthiocerol synthesis polyketide synthase type I -like	5.16293
TRINITY_DN9650_c0_g1_i1	K01698	delta-aminolevulinic acid dehydratase	5.16144
TRINITY_DN81381_c0_g1_i1	K00648	3-oxoacyl-[acyl-carrier- ] synthase III	5.15315
TRINITY_DN133420_c0_g1_i1	---NA---	shell fibrous prismatic perlucin 1	5.14709
TRINITY_DN135979_c2_g1_i3	---NA---	Cytadherence high molecular weight 2	5.13779
TRINITY_DN108497_c0_g1_i1	---NA---	methionine synthase	5.13343
TRINITY_DN127036_c0_g1_i1	---NA---	polypeptide N-acetylgalactosaminyltransferase 5-like	5.11561
TRINITY_DN31597_c0_g1_i1	K01689	phosphopyruvate hydratase	5.10765
TRINITY_DN135417_c1_g1_i1	---NA---	toll-like receptor 4	5.1062
TRINITY_DN19072_c0_g1_i1	---NA---	molecular chaperone	5.10331
TRINITY_DN4814_c0_g1_i1	---NA---	isocitrate dehydrogenase	5.10287
TRINITY_DN110838_c0_g1_i1	---NA---	coiled-coil domain-containing 8 homolog	5.10178
TRINITY_DN116822_c0_g2_i1	---NA---	cyclic pyranopterin phosphate synthase	5.10028
TRINITY_DN125513_c0_g1_i2	---NA---	T-box transcription factor TBX20-like	5.09812
TRINITY_DN134723_c0_g1_i1	K20051	low-density lipo receptor-related 4-like	5.08336
TRINITY_DN114034_c0_g1_i1	---NA---	D-3-phosphoglycerate dehydrogenase	5.0736
TRINITY_DN94007_c0_g1_i1	---NA---	ribosome recycling factor	5.07255
TRINITY_DN144204_c0_g1_i2	---NA---	PREDICTED: uncharacterized protein C167.05-like	5.07195
TRINITY_DN131904_c3_g2_i2	---NA---	nidogen and EGF-like domain-containing 1	5.0553
TRINITY_DN135762_c1_g2_i3	---NA---	PREDICTED: uncharacterized protein LOC105345736	5.04924
TRINITY_DN128063_c1_g1_i2	---NA---	proline-rich partial	5.0449
TRINITY_DN95888_c0_g3_i1	K01892	histidine--tRNA ligase	5.04112
TRINITY_DN118473_c0_g1_i1	---NA---	tubulin beta-4B chain	5.04112
TRINITY_DN116525_c1_g1_i1	K13858	electrogenic sodium bicarbonate cotransporter 1-like	5.00932
TRINITY_DN142225_c0_g2_i1	K03593	iron sulfur binding	4.98649
TRINITY_DN155946_c0_g1_i1	---NA---	fumarate hydratase	4.97472
TRINITY_DN133513_c3_g5_i2	---NA---	gamma-glutamyltranspeptidase 1-like	4.97382
TRINITY_DN134037_c4_g1_i1	---NA---	PREDICTED: uncharacterized protein LOC106178878	4.96515
TRINITY_DN129242_c0_g1_i1	---NA---	MICAL 1	4.96502
TRINITY_DN31967_c0_g1_i1	---NA---	partial [	4.94683
TRINITY_DN124091_c0_g1_i1	---NA---	leucine-rich repeat-containing DDB_G0290503	4.92045
TRINITY_DN136513_c0_g1_i1	---NA---	cysteine--tRNA ligase	4.91138
TRINITY_DN69279_c0_g1_i2	---NA---	dopey homolog PFC0245c-like	4.9074
TRINITY_DN110418_c0_g2_i1	---NA---	steroid 17-alpha-hydroxylase 17,20 lyase-like	4.90184
TRINITY_DN124950_c0_g1_i3	---NA---	hypothetical protein N326_05009, partial	4.88593
TRINITY_DN203682_c0_g1_i1	---NA---	multidrug ABC transporter ATP-binding	4.88468
TRINITY_DN132239_c4_g1_i2	---NA---	hypothetical protein LOTGIDRAFT_234340	4.87497
TRINITY_DN76071_c0_g1_i1	---NA---	sodium:proton antiporter	4.86467
TRINITY_DN136040_c4_g1_i5	---NA---	reverse transcriptase	4.86314
TRINITY_DN134230_c18_g2_i2	---NA---	prion-like-(Q N-rich) domain-bearing 25	4.84883
TRINITY_DN132369_c0_g2_i2	---NA---	FAM13B-like	4.81913
TRINITY_DN96530_c0_g1_i1	K01465	dihydroorotase	4.81207
TRINITY_DN103579_c0_g1_i1	---NA---	leucine--tRNA ligase	4.81207
TRINITY_DN129006_c0_g2_i9	---NA---	phosphatidylinositol 3-kinase regulatory subunit alpha-like	4.80842
TRINITY_DN113198_c0_g1_i1	K01873	valyl-tRNA synthetase	4.7996
TRINITY_DN133851_c0_g1_i1	---NA---	von Willebrand factor type EGF and pentraxin domain-containing 1-like	4.78507
TRINITY_DN135848_c2_g2_i2	---NA---	hypothetical protein BRAFLDRAFT_126413	4.78205
TRINITY_DN126202_c0_g1_i2	---NA---	NADPH oxidase 5-like	4.78043
TRINITY_DN135276_c4_g1_i1	---NA---	sodium-coupled monocarboxylate transporter 1-like	4.77707
TRINITY_DN134644_c3_g2_i3	---NA---	SEC14 domain and spectrin repeat-containing 1-B-like	4.77574
TRINITY_DN124760_c0_g2_i1	---NA---	transmembrane 179B-like	4.77434
TRINITY_DN133980_c0_g1_i2	K16669	cadherin-related tumor suppressor	4.76645
TRINITY_DN134566_c0_g2_i2	K09188	histone-lysine N-methyltransferase 2C-like	4.76574
TRINITY_DN112254_c0_g1_i1	K01872	alanine--tRNA ligase	4.7584
TRINITY_DN126095_c0_g2_i1	---NA---	hypothetical protein GLOINDRAFT_88523	4.75762
TRINITY_DN35552_c0_g1_i1	---NA---	hypothetical protein J457_4177, partial	4.75583
TRINITY_DN120160_c0_g1_i1	K07378	carboxylesterase 5A-like	4.74899
TRINITY_DN116417_c0_g1_i2	---NA---	PREDICTED: uncharacterized protein LOC105322140	4.74864
TRINITY_DN127337_c0_g1_i2	---NA---	sodium channel 1 brain-like	4.74252
TRINITY_DN133524_c14_g6_i1	---NA---	xaa-Pro aminopeptidase 1-like	4.73513
TRINITY_DN69921_c0_g1_i1	---NA---	Flattop homolog	4.73509
TRINITY_DN123460_c2_g2_i4	K11997	probable E3 ubiquitin- ligase MID2	4.7349
TRINITY_DN204276_c0_g1_i1	---NA---	hypothetical protein LOTGIDRAFT_238066	4.7011
TRINITY_DN111423_c0_g1_i1	---NA---	tetraspanin-18-like	4.69687
TRINITY_DN72409_c0_g1_i1	---NA---	16S rRNA (cytosine(1402)-N(4))-methyltransferase	4.69579
TRINITY_DN65613_c0_g1_i1	---NA---	ras-associating and dilute domain-containing -like	4.69397
TRINITY_DN79188_c1_g1_i1	---NA---	3-ketoacyl-(Acyl-carrier- ) reductase	4.68722
TRINITY_DN63023_c0_g1_i1	K01881	proline--tRNA ligase	4.68229
TRINITY_DN26224_c0_g1_i1	---NA---	erythronate-4-phosphate dehydrogenase	4.66865
TRINITY_DN64871_c0_g1_i1	K17353	tetraspanin-1-like	4.66764
TRINITY_DN130287_c0_g1_i1	K01951	GMP synthase (glutamine-hydrolysing)	4.65486
TRINITY_DN135255_c2_g5_i1	K15127	transcriptional adapter 2-beta-like	4.65486
TRINITY_DN125640_c0_g1_i1	---NA---	ATP-dependent RNA helicase	4.64096
TRINITY_DN134644_c3_g1_i1	---NA---	SEC14 domain and spectrin repeat-containing 1-B-like	4.6399
TRINITY_DN134773_c4_g1_i2	---NA---	perlucin-like	4.63976
TRINITY_DN65010_c0_g2_i1	---NA---	laccase-4-like	4.63931
TRINITY_DN134697_c0_g6_i2	---NA---	hypothetical protein CGI_10023348	4.63377
TRINITY_DN133513_c0_g1_i1	---NA---	gamma-glutamyltranspeptidase 1-like	4.62961
TRINITY_DN92520_c0_g2_i1	K08628	A disintegrin and metallo ase with thrombospondin motifs 2	4.62947
TRINITY_DN135765_c2_g2_i1	K10411	Dynein light chain axonemal	4.62691
TRINITY_DN125593_c0_g2_i1	---NA---	Kyphoscoliosis peptidase	4.62584
TRINITY_DN122576_c1_g3_i4	---NA---	sodium- and chloride-dependent glycine transporter 1-like	4.61391
TRINITY_DN135797_c1_g1_i5	---NA---	hypothetical protein LOTGIDRAFT_152266	4.61053
TRINITY_DN118521_c0_g1_i3	---NA---	egg bindin receptor 1 precursor	4.60465
TRINITY_DN132805_c2_g2_i2	---NA---	cadherin-related tumor suppressor	4.6046
TRINITY_DN135400_c3_g1_i3	---NA---	calcium-binding tyrosine phosphorylation-regulated	4.59841
TRINITY_DN136149_c0_g1_i1	---NA---	PREDICTED: uncharacterized protein LOC105320454, partial	4.59017
TRINITY_DN136229_c1_g3_i1	---NA---	PREDICTED: uncharacterized protein LOC105340416	4.58891
TRINITY_DN118663_c0_g1_i1	---NA---	major capsid	4.58396
TRINITY_DN132709_c0_g5_i1	---NA---	Fibroblast growth factor receptor 1	4.5571
TRINITY_DN111190_c0_g2_i1	---NA---	ABC transporter ATP-binding	4.55458
TRINITY_DN135273_c0_g2_i2	---NA---	PREDICTED: uncharacterized protein LOC105348534, partial	4.55154
TRINITY_DN22319_c0_g1_i1	K18152	ADP-ribosyl cyclase cyclic ADP-ribose hydrolase-like	4.53895
TRINITY_DN134122_c0_g1_i1	K08052	neurofibromin-like	4.53298
TRINITY_DN111369_c0_g1_i1	---NA---	[ -PII] uridylyltransferase	4.5246
TRINITY_DN70990_c0_g1_i1	K02316	DNA primase	4.5246
TRINITY_DN128195_c0_g2_i1	---NA---	per-hexamer repeat 5	4.5246
TRINITY_DN104646_c0_g1_i1	---NA---	lytic transglycosylase	4.50937
TRINITY_DN135815_c0_g2_i1	K00097	4-hydroxythreonine-4-phosphate dehydrogenase	4.5063
TRINITY_DN131864_c4_g3_i1	---NA---	probable domain-containing histone demethylation 2C	4.49398
TRINITY_DN126899_c0_g1_i2	K05110	ephrin type-B receptor 1-B-like	4.49069
TRINITY_DN136116_c8_g5_i1	---NA---	PREDICTED: uncharacterized protein LOC101855048	4.48466
TRINITY_DN132355_c1_g1_i3	K00758	thymidine phosphorylase-like	4.4764
TRINITY_DN190930_c0_g1_i1	K01591	orotidine 5 -phosphate decarboxylase	4.46271
TRINITY_DN204358_c0_g2_i1	K07277	bacterial surface antigen family	4.45801
TRINITY_DN123311_c3_g1_i1	---NA---	protocadherin Fat 4-like	4.45724
TRINITY_DN127490_c1_g2_i2	---NA---	beta-1,4-mannosyltransferase egh-like	4.43789
TRINITY_DN121436_c0_g1_i1	---NA---	A disintegrin and metallo ase with thrombospondin motifs 14-like	4.42914
TRINITY_DN135829_c0_g6_i4	---NA---	tigger transposable element-derived 6	4.42439
TRINITY_DN136040_c5_g5_i2	---NA---	PREDICTED: uncharacterized protein LOC105317331	4.42146
TRINITY_DN87205_c0_g3_i1	K00278	L-aspartate oxidase	4.41447
TRINITY_DN131717_c0_g2_i1	---NA---	serine arginine repetitive matrix 2-like	4.40829
TRINITY_DN133618_c0_g2_i3	K11840	ubiquitin carboxyl-terminal hydrolase 24-like	4.40508
TRINITY_DN131404_c3_g1_i2	---NA---	CKLF-like MARVEL transmembrane domain-containing 4	4.39876
TRINITY_DN88183_c0_g2_i1	---NA---	poly(A) polymerase	4.39804
TRINITY_DN125102_c1_g1_i1	---NA---	chorion peroxidase-like	4.38951
TRINITY_DN136230_c2_g3_i3	---NA---	E3 ubiquitin- ligase RNF213-like	4.38454
TRINITY_DN135969_c0_g5_i1	---NA---	Retrovirus-related Pol poly from transposon 412	4.38122
TRINITY_DN20010_c0_g1_i1	K01365	cathepsin L1-like	4.38022
TRINITY_DN113067_c0_g1_i1	---NA---	mammalian ependymin-related 1-like	4.37039
TRINITY_DN32083_c0_g3_i1	K04042	bifunctional N-acetylglucosamine-1-phosphate uridyltransferase glucosamine-1-phosphate acetyltransferase	4.36458
TRINITY_DN113705_c0_g2_i1	---NA---	complement C1q 4	4.36458
TRINITY_DN203893_c0_g1_i1	K03595	GTPase Era	4.36458
TRINITY_DN135291_c0_g4_i9	K20478	centrosome-associated CEP250-like	4.36163
TRINITY_DN136249_c0_g1_i1	---NA---	PREDICTED: uncharacterized protein LOC105325414	4.35585
TRINITY_DN133247_c2_g1_i1	---NA---	hypothetical protein	4.35568
TRINITY_DN108821_c0_g1_i1	---NA---	RNA-directed DNA polymerase from mobile element jockey-like	4.35377
TRINITY_DN136223_c0_g1_i1	---NA---	E3 ubiquitin- ligase RNF213-like	4.35147
TRINITY_DN119438_c0_g4_i1	---NA---	fibrous sheath-interacting 1-like	4.34756
TRINITY_DN122357_c0_g3_i1	K14402	cleavage and polyadenylation specificity factor subunit 2-like	4.34724
TRINITY_DN134234_c0_g2_i1	---NA---	PREDICTED: uncharacterized protein KIAA1109-like	4.33991
TRINITY_DN113704_c0_g1_i1	---NA---	EGF-like domain	4.33896
TRINITY_DN133598_c0_g2_i2	---NA---	sacsin-like	4.33322
TRINITY_DN16005_c0_g2_i1	K01754	PLP-dependent threonine dehydratase	4.33033
TRINITY_DN129757_c0_g1_i1	---NA---	glycosyl transferase	4.3129
TRINITY_DN92964_c0_g1_i1	K07819	beta-1,3-galactosyltransferase 5-like	4.31146
TRINITY_DN125316_c0_g1_i2	---NA---	ribonucleo PTB-binding 2-like	4.30481
TRINITY_DN135615_c2_g1_i2	---NA---	reverse transcriptase	4.30189
TRINITY_DN130774_c0_g6_i1	---NA---	electron transporter	4.29525
TRINITY_DN118663_c1_g1_i1	---NA---	major capsid	4.29525
TRINITY_DN134552_c0_g1_i8	K06252	Tenascin- partial	4.29516
TRINITY_DN133553_c0_g2_i1	---NA---	c-binding -like	4.28861
TRINITY_DN135942_c0_g5_i2	---NA---	piggyBac transposable element-derived 4-like	4.28746
TRINITY_DN136067_c0_g3_i1	---NA---	TPA_exp: poly	4.28639
TRINITY_DN189705_c0_g2_i1	---NA---	inositol 1,4,5-trisphosphate receptor type 3-like	4.27739
TRINITY_DN100437_c0_g2_i1	---NA---	NACHT and WD repeat domain-containing 1	4.27739
TRINITY_DN118136_c0_g1_i1	---NA---	allene oxide synthase-lipoxygenase -like	4.27094
TRINITY_DN104221_c0_g2_i1	K17943	pumilio homolog 2-like	4.27051
TRINITY_DN134288_c6_g3_i6	---NA---	histone-lysine N-methyltransferase set-1	4.26852
TRINITY_DN135942_c0_g1_i2	---NA---	piggyBac transposable element-derived 4-like	4.2629
TRINITY_DN134587_c5_g3_i2	---NA---	ARS-binding 1-like	4.26092
TRINITY_DN133180_c0_g1_i2	---NA---	neurogenic locus notch homolog 1-like	4.2593
TRINITY_DN123460_c1_g2_i1	K11997	tripartite motif-containing 45-like	4.2593
TRINITY_DN136247_c3_g2_i1	---NA---	hypothetical protein GLOINDRAFT_88523	4.25658
TRINITY_DN135926_c1_g1_i2	---NA---	piggyBac transposable element-derived 4-like	4.24623
TRINITY_DN129427_c0_g2_i1	---NA---	B-cell lymphoma leukemia 11A-like	4.24159
TRINITY_DN68814_c0_g1_i1	---NA---	PREDICTED: uncharacterized protein LOC105341149	4.23461
TRINITY_DN135599_c1_g7_i5	K01077	alkaline phosphatase-like	4.23166
TRINITY_DN127036_c0_g2_i1	---NA---	polypeptide N-acetylgalactosaminyltransferase 5-like	4.22269
TRINITY_DN115851_c0_g1_i1	K03217	membrane insertase	4.22243
TRINITY_DN134372_c2_g1_i8	K05694	receptor-type tyrosine- phosphatase beta-like	4.21583
TRINITY_DN112131_c0_g1_i1	---NA---	adhesive plaque matrix -like	4.21212
TRINITY_DN131227_c1_g1_i4	K04608	Metabotropic glutamate receptor 7	4.2108
TRINITY_DN88388_c0_g1_i1	K06041	D-arabinose 5-phosphate isomerase	4.20364
TRINITY_DN126571_c0_g1_i4	---NA---	acidic mammalian chitinase-like	4.19775
TRINITY_DN124867_c0_g1_i2	---NA---	proline-rich extensin partial	4.19617
TRINITY_DN135664_c0_g2_i1	---NA---	dynein gamma flagellar outer arm-like	4.18459
TRINITY_DN45759_c0_g1_i1	K03768	peptidyl-prolyl cis-trans isomerase-like	4.18102
TRINITY_DN127171_c0_g2_i1	---NA---	E3 ubiquitin- ligase RNF213-like	4.16898
TRINITY_DN98997_c0_g1_i1	---NA---	Delta and Notch-like epidermal growth factor-related receptor	4.16567
TRINITY_DN117633_c1_g1_i1	---NA---	hypothetical protein LOTGIDRAFT_173195	4.1653
TRINITY_DN97641_c0_g2_i3	---NA---	proteoglycan 4-like	4.14572
TRINITY_DN95888_c0_g1_i1	K03977	ribosome biogenesis GTPase Der	4.14082
TRINITY_DN131381_c2_g2_i2	---NA---	FRAS1-related extracellular matrix 2-like	4.13931
TRINITY_DN122494_c0_g1_i1	K12818	pre-mRNA-splicing factor ATP-dependent RNA helicase mog-5	4.13857
TRINITY_DN134644_c4_g1_i5	K12567	titin-like	4.13335
TRINITY_DN17003_c0_g1_i1	K06546	sialomucin core 24-like	4.12865
TRINITY_DN130066_c1_g5_i1	---NA---	glutamate--cysteine ligase	4.12591
TRINITY_DN134039_c2_g1_i1	K07055	tRNA wybutosine-synthesizing 2 homolog	4.1254
TRINITY_DN134261_c1_g6_i3	---NA---	girdin-like	4.11682
TRINITY_DN124482_c0_g3_i1	K15616	eyes absent homolog 1-like	4.11668
TRINITY_DN136060_c4_g1_i3	---NA---	Serine threonine- phosphatase 6 regulatory ankyrin repeat subunit C	4.11236
TRINITY_DN125971_c0_g1_i2	K08826	Homeodomain-interacting kinase 2	4.10166
TRINITY_DN134372_c2_g5_i2	---NA---	neurogenic locus notch homolog 1-like	4.08841
TRINITY_DN121805_c0_g1_i1	---NA---	glutamyl-tRNA reductase	4.08541
TRINITY_DN88040_c1_g1_i1	---NA---	hypothetical protein COSY_0198	4.08541
TRINITY_DN52519_c0_g3_i1	---NA---	rolling stone-like	4.08541
TRINITY_DN135516_c0_g3_i5	---NA---	piggyBac transposable element-derived 4-like	4.08226
TRINITY_DN123312_c0_g1_i1	---NA---	PREDICTED: uncharacterized protein LOC105438389	4.07011
TRINITY_DN136230_c3_g6_i3	---NA---	E3 ubiquitin- ligase RNF213-like	4.06861
TRINITY_DN45780_c0_g1_i1	K13247	lambda-crystallin homolog	4.06649
TRINITY_DN89680_c0_g2_i1	---NA---	odulin family member cmd 1	4.06474
TRINITY_DN79655_c0_g2_i1	---NA---	PREDICTED: uncharacterized protein LOC105324288	4.06474
TRINITY_DN119617_c2_g3_i1	---NA---	probable sodium potassium calcium exchanger CG1090	4.06474
TRINITY_DN131671_c0_g2_i1	---NA---	hypothetical protein LOTGIDRAFT_231644	4.06255
TRINITY_DN133884_c2_g3_i1	---NA---	von Willebrand factor type EGF and pentraxin domain-containing 1	4.06191
TRINITY_DN81928_c0_g1_i1	---NA---	sortilin-related receptor-like	4.05293
TRINITY_DN122959_c1_g1_i6	---NA---	variable lymphocyte receptor diversity region	4.05211
TRINITY_DN50994_c0_g2_i1	K14388	sodium-coupled monocarboxylate transporter 1-like	4.05186
TRINITY_DN123467_c0_g3_i1	K02602	cytoplasmic polyadenylation element-binding 2-like	4.0507
TRINITY_DN134951_c1_g1_i1	---NA---	PREDICTED: uncharacterized protein LOC105438389	4.04929
TRINITY_DN134995_c2_g1_i9	---NA---	hypothetical protein LOTGIDRAFT_229168	4.04118
TRINITY_DN129661_c0_g1_i3	---NA---	Tudor domain-containing 1	4.04096
TRINITY_DN134737_c5_g4_i1	---NA---	NS1, partial	4.03674
TRINITY_DN134394_c1_g1_i4	---NA---	PREDICTED: uncharacterized protein LOC105328766	4.03319
TRINITY_DN127754_c1_g1_i1	---NA---	leucine zipper 4	4.03059
TRINITY_DN120736_c1_g2_i1	---NA---	sulfotransferase family cytosolic 1B member 1-like	4.02636
TRINITY_DN85081_c2_g3_i1	K14319	ran GTPase-activating 1-like	4.02247
TRINITY_DN105995_c0_g2_i1	---NA---	amino acid transporter ANTL1-like	4.01676
TRINITY_DN136008_c2_g2_i2	---NA---	PREDICTED: uncharacterized protein LOC105322640	4.01661
TRINITY_DN135429_c0_g1_i2	---NA---	PREDICTED: uncharacterized protein LOC106814923	4.00547
TRINITY_DN134772_c0_g2_i1	---NA---	DDE superfamily endonuclease CENP B	4.00509
TRINITY_DN135416_c1_g1_i6	---NA---	hypothetical protein BRAFLDRAFT_69759	4.00433
TRINITY_DN123039_c0_g2_i1	K13038	phosphopantothenoylcysteine decarboxylase	4.00087
TRINITY_DN72089_c0_g1_i1	---NA---	von Willebrand factor type EGF and pentraxin domain-containing 1	4.00087
TRINITY_DN136205_c7_g1_i3	---NA---	collagen alpha-1(V) chain-like	3.99621
TRINITY_DN110737_c0_g1_i1	---NA---	hypothetical protein NEMVEDRAFT_v1g146929	3.9928
TRINITY_DN155486_c0_g1_i1	---NA---	hypothetical protein CGI_10021602	3.99272
TRINITY_DN203967_c0_g1_i1	---NA---	PR domain zinc finger 1-like	3.98325
TRINITY_DN135792_c0_g4_i2	---NA---	von Willebrand factor type EGF and pentraxin domain-containing 1-like	3.98244
TRINITY_DN100074_c0_g1_i1	---NA---	trifunctional enzyme subunit mitochondrial-like	3.97893
TRINITY_DN133734_c9_g1_i3	---NA---	piccolo-like	3.96677
TRINITY_DN132925_c8_g1_i5	---NA---	strawberry notch homolog 1-like	3.96561
TRINITY_DN129608_c0_g2_i1	---NA---	bifunctional ornithine acetyltransferase N-acetylglutamate synthase	3.95665
TRINITY_DN131016_c1_g1_i2	---NA---	hypothetical protein LOTGIDRAFT_161833	3.95665
TRINITY_DN90269_c1_g2_i1	K01784	UDP-glucose 4-epimerase-like	3.95665
TRINITY_DN16973_c0_g1_i2	K13780	large neutral amino acids transporter small subunit 1-like	3.95588
TRINITY_DN125285_c0_g3_i2	---NA---	leucine-rich repeat serine threonine- kinase 1-like	3.95553
TRINITY_DN126639_c1_g1_i1	K09866	aquaporin -like	3.95042
TRINITY_DN130828_c0_g2_i1	---NA---	sodium- and chloride-dependent neutral and basic amino acid transporter B(0+)-like	3.94609
TRINITY_DN204201_c0_g2_i1	K14640	phosphate permease	3.9412
TRINITY_DN136065_c0_g2_i1	---NA---	predicted protein	3.93977
TRINITY_DN134566_c1_g1_i2	---NA---	histone-lysine N-methyltransferase 2C-like	3.93795
TRINITY_DN120359_c1_g4_i1	K14611	solute carrier family 23 member 1-like	3.93403
TRINITY_DN87397_c0_g1_i1	---NA---	F-box only 36-like	3.93132
TRINITY_DN136104_c0_g1_i3	---NA---	hypothetical protein LOTGIDRAFT_162040	3.91537
TRINITY_DN128128_c0_g2_i3	---NA---	patched domain-containing 2-like	3.91351
TRINITY_DN135436_c0_g1_i2	---NA---	tigger transposable element-derived 6	3.91145
TRINITY_DN131251_c1_g1_i1	---NA---	sulfate transporter-like	3.90547
TRINITY_DN130044_c0_g2_i1	---NA---	hypothetical protein	3.90287
TRINITY_DN132914_c2_g1_i1	---NA---	nitrite reductase large subunit	3.90007
TRINITY_DN133012_c0_g4_i4	---NA---	annexin A6-like	3.89503
TRINITY_DN131904_c2_g5_i2	---NA---	neurogenic locus Notch -like	3.89262
TRINITY_DN136228_c7_g1_i4	---NA---	PREDICTED: uncharacterized protein LOC105440841	3.89193
TRINITY_DN135688_c0_g3_i1	K16681	crumbs	3.89011
TRINITY_DN136121_c1_g1_i1	---NA---	E3 ubiquitin- ligase RNF213-like	3.88778
TRINITY_DN86487_c0_g1_i1	---NA---	peptidyl-prolyl cis-trans isomerase	3.8877
TRINITY_DN89216_c1_g1_i1	---NA---	tctex1 domain-containing 1-like	3.8877
TRINITY_DN131896_c1_g1_i5	K05727	dedicator of cytokinesis 4-like	3.88498
TRINITY_DN131814_c2_g2_i1	---NA---	PREDICTED: uncharacterized protein LOC105344431	3.88367
TRINITY_DN136139_c2_g7_i1	---NA---	G- coupled receptor 64-like	3.88365
TRINITY_DN134336_c0_g1_i2	---NA---	Ras-related Rab-8A	3.88251
TRINITY_DN135389_c0_g2_i4	---NA---	piggyBac transposable element-derived 4-like	3.87493
TRINITY_DN134522_c14_g5_i1	---NA---	piggyBac transposable element-derived 4-like	3.87379
TRINITY_DN131251_c0_g1_i3	---NA---	sulfate transporter-like	3.87171
TRINITY_DN133618_c0_g1_i5	K11840	Ubiquitin carboxyl-terminal hydrolase 24	3.87016
TRINITY_DN135666_c1_g1_i5	---NA---	TPR and ankyrin repeat-containing 1-like	3.86697
TRINITY_DN131887_c0_g5_i1	---NA---	sel-1 homolog 3-like	3.86548
TRINITY_DN95581_c1_g1_i1	---NA---	inverted formin-2-like	3.86396
TRINITY_DN55761_c0_g1_i1	---NA---	leucine-rich repeat-containing 74B-like	3.86396
TRINITY_DN171365_c0_g1_i1	---NA---	PREDICTED: uncharacterized protein LOC105321461	3.86396
TRINITY_DN144448_c0_g1_i1	---NA---	toll-like receptor 2	3.86396
TRINITY_DN136017_c4_g3_i1	---NA---	transient receptor potential cation channel subfamily V member 5-like	3.86396
TRINITY_DN134781_c3_g10_i1	---NA---	PREDICTED: uncharacterized protein LOC105437383	3.85742
TRINITY_DN131577_c0_g2_i2	---NA---	CUB and sushi domain-containing 3-like	3.85133
TRINITY_DN126324_c1_g1_i2	---NA---	hypothetical protein LOTGIDRAFT_109590	3.85004
TRINITY_DN132515_c2_g3_i1	---NA---	MAM and LDL-receptor class A domain-containing 1-like	3.84815
TRINITY_DN131361_c0_g1_i1	---NA---	PREDICTED: uncharacterized protein LOC106164022	3.84475
TRINITY_DN128697_c1_g1_i1	---NA---	transmembrane and TPR repeat-containing 3-like	3.84436
TRINITY_DN114194_c0_g2_i1	K01945	phosphoribosylamine--glycine ligase	3.83984
TRINITY_DN64179_c1_g1_i1	---NA---	PREDICTED: uncharacterized protein LOC106150736	3.83984
TRINITY_DN79925_c0_g1_i1	---NA---	#NAME?	3.83984
TRINITY_DN136139_c2_g8_i2	---NA---	G- coupled receptor 64-like	3.83863
TRINITY_DN118800_c1_g3_i1	---NA---	hypothetical protein LOTGIDRAFT_232908	3.83837
TRINITY_DN88234_c0_g1_i1	K13403	bifunctional methylenetetrahydrofolate dehydrogenase mitochondrial-like	3.83525
TRINITY_DN127699_c1_g3_i1	---NA---	WAS WASL-interacting family member 1-like	3.83087
TRINITY_DN122207_c1_g1_i1	---NA---	calcium-dependent kinase C-like	3.82983
TRINITY_DN129223_c3_g3_i4	K13207	CUGBP Elav-like family member 2	3.82633
TRINITY_DN203838_c0_g1_i1	---NA---	coiled-coil domain-containing 158-like	3.82382
TRINITY_DN129734_c1_g1_i1	---NA---	cartilage matrix -like	3.82237
TRINITY_DN104741_c0_g1_i2	K11997	B-box type zinc finger ncl-1-like	3.82134
TRINITY_DN116239_c0_g1_i1	K15261	poly [ADP-ribose] polymerase 14-like	3.81569
TRINITY_DN110690_c0_g1_i3	---NA---	polycystic kidney disease 1-like 3	3.8153
TRINITY_DN135688_c0_g4_i6	K16681	crumbs-like	3.81507
TRINITY_DN126534_c0_g1_i2	K08471	hypothetical protein LOTGIDRAFT_152656	3.81362
TRINITY_DN134852_c1_g4_i1	---NA---	exosome complex exonuclease RRP44	3.80087
TRINITY_DN132465_c7_g1_i1	K20051	Low-density lipo receptor-related 6	3.79911
TRINITY_DN133539_c8_g1_i1	---NA---	universal stress A	3.79849
TRINITY_DN134889_c3_g4_i2	---NA---	msx2-interacting -like	3.79679
TRINITY_DN174777_c0_g1_i1	---NA---	zinc finger 226	3.79041
TRINITY_DN134870_c0_g2_i1	---NA---	inositol 1,4,5-trisphosphate receptor A	3.79031
TRINITY_DN20808_c0_g1_i1	K09808	lipo ABC transporter permease	3.79031
TRINITY_DN100437_c1_g1_i1	---NA---	NACHT and WD repeat domain-containing 1	3.79031
TRINITY_DN136147_c3_g4_i1	---NA---	piggyBac transposable element-derived 4-like	3.78739
TRINITY_DN134734_c1_g1_i1	---NA---	zinc finger 862-like	3.7853
TRINITY_DN133734_c9_g2_i1	---NA---	piccolo-like	3.78485
TRINITY_DN132511_c0_g1_i1	K08794	calcium calmodulin-dependent kinase type 1-like	3.78309
TRINITY_DN134078_c0_g2_i2	K00718	galactoside 2-alpha-L-fucosyltransferase 1-like	3.78291
TRINITY_DN136075_c7_g3_i2	---NA---	PREDICTED: uncharacterized protein LOC106158303	3.77985
TRINITY_DN134468_c3_g3_i5	K11367	chromodomain-helicase-DNA-binding 1-like	3.77615
TRINITY_DN11862_c0_g2_i1	---NA---	solute carrier family 23 member 1-like	3.7726
TRINITY_DN133374_c1_g8_i1	---NA---	Cation-independent mannose-6-phosphate receptor	3.76747
TRINITY_DN126465_c0_g1_i1	K00099	1-deoxy-D-xylulose 5-phosphate reductoisomerase	3.76492
TRINITY_DN136005_c3_g3_i1	---NA---	RNA-directed DNA polymerase from mobile element jockey- partial	3.76492
TRINITY_DN110986_c1_g2_i1	---NA---	T-box transcription factor TBX20	3.76492
TRINITY_DN99552_c0_g1_i1	K16299	metal ABC transporter permease	3.75765
TRINITY_DN123620_c0_g1_i1	---NA---	Abnormal spindle-like microcephaly-associated	3.75529
TRINITY_DN134052_c0_g3_i1	---NA---	Maverick integrase	3.7536
TRINITY_DN135756_c0_g6_i3	---NA---	zinc finger 862-like	3.75201
TRINITY_DN135857_c0_g6_i1	---NA---	pre-mRNA-splicing factor ATP-dependent RNA helicase mog-5	3.74329
TRINITY_DN143312_c0_g1_i1	K19970	5 -nucleotidase-like	3.73905
TRINITY_DN114829_c0_g1_i1	K02836	peptide chain release factor 2	3.73905
TRINITY_DN75697_c2_g1_i1	---NA---	PREDICTED: uncharacterized protein LOC105333508	3.73905
TRINITY_DN17974_c0_g1_i1	---NA---	Zn-dependent hydrolase	3.73905
TRINITY_DN134361_c0_g3_i2	---NA---	Neurotrypsin	3.73673
TRINITY_DN111920_c0_g2_i1	K10588	ubiquitin- ligase E3B-like	3.72872
TRINITY_DN134279_c9_g2_i2	K05094	PREDICTED: uncharacterized protein LOC105347506	3.72833
TRINITY_DN122494_c0_g2_i1	K12818	pre-mRNA-splicing factor ATP-dependent RNA helicase mog-5	3.72729
TRINITY_DN133075_c1_g3_i1	K04887	Shaw potassium channel	3.71893
TRINITY_DN112120_c0_g2_i1	---NA---	dynamin-1-like	3.7185
TRINITY_DN116925_c0_g1_i1	---NA---	hypothetical protein LOTGIDRAFT_70700, partial	3.71386
TRINITY_DN77116_c0_g1_i1	---NA---	pollen-specific leucine-rich repeat extensin 1-like	3.71273
TRINITY_DN91553_c0_g1_i1	---NA---	PREDICTED: uncharacterized protein ZK1073.1-like	3.71273
TRINITY_DN81770_c1_g2_i1	---NA---	WAP four-disulfide core domain 18-like	3.71271
TRINITY_DN66153_c1_g1_i1	---NA---	defense 3	3.71164
TRINITY_DN130725_c0_g2_i3	K04560	AF484088_1syntaxin 1A	3.70921
TRINITY_DN133389_c7_g4_i1	---NA---	hypothetical protein LOTGIDRAFT_165207	3.70685
TRINITY_DN132656_c1_g1_i2	K15185	AF4 FMR2 family member 4	3.69168
TRINITY_DN134603_c10_g1_i1	---NA---	PREDICTED: uncharacterized protein LOC105326178	3.68999
TRINITY_DN134889_c3_g2_i2	---NA---	msx2-interacting -like	3.68888
TRINITY_DN137063_c0_g1_i1	---NA---	neurogenic locus notch homolog 1-like	3.6859
TRINITY_DN70648_c0_g1_i1	---NA---	pannexin 3	3.6859
TRINITY_DN129928_c1_g1_i1	K19539	selenocysteine insertion sequence-binding 2-like	3.68568
TRINITY_DN130881_c0_g1_i5	K14995	sodium-coupled neutral amino acid transporter 9	3.68446
TRINITY_DN128152_c1_g2_i3	---NA---	yippee-like 2	3.68227
TRINITY_DN133996_c5_g3_i4	K04550	prolow-density lipo receptor-related 1	3.67877
TRINITY_DN133665_c0_g10_i3	---NA---	Fibropellin-1	3.67488
TRINITY_DN131378_c0_g1_i4	K06756	neuroglian-like	3.67467
TRINITY_DN125333_c2_g1_i1	---NA---	kelch 26	3.66912
TRINITY_DN134370_c16_g1_i3	---NA---	cadherin EGF LAG seven-pass G-type receptor 1	3.6666
TRINITY_DN133261_c1_g1_i5	K18443	golgi-specific brefeldin A-resistance guanine nucleotide exchange factor 1-like	3.66538
TRINITY_DN117633_c0_g1_i1	K11140	aminopeptidase N-like	3.66387
TRINITY_DN129573_c0_g3_i1	K07249	AF148508_1aldehyde dehydrogenase	3.66197
TRINITY_DN62714_c0_g1_i1	---NA---	exocyst complex component 3-like	3.65972
TRINITY_DN136139_c2_g5_i1	---NA---	latrophilin Cirl-like	3.65891
TRINITY_DN111190_c0_g1_i1	---NA---	ABC transporter ATP-binding	3.65858
TRINITY_DN131628_c0_g1_i1	---NA---	E3 SUMO- ligase partial	3.65858
TRINITY_DN107938_c0_g1_i1	---NA---	glutaminyl-tRNA synthetase	3.65858
TRINITY_DN131409_c0_g1_i2	---NA---	vasopressin-neurophysin 2-copeptin	3.65858
TRINITY_DN119353_c0_g2_i1	---NA---	receptor-transporting 4-like	3.65365
TRINITY_DN120953_c0_g2_i1	K05094	fibroblast growth factor receptor 4-like	3.65339
TRINITY_DN111674_c0_g2_i1	K11499	centromere F-like	3.6504
TRINITY_DN98691_c0_g1_i3	---NA---	hypothetical protein UT94_C0032G0003	3.65033
TRINITY_DN130294_c0_g1_i1	---NA---	L-ascorbate oxidase-like	3.65033
TRINITY_DN64446_c0_g1_i1	---NA---	triacylglycerol lipase	3.65033
TRINITY_DN134179_c0_g2_i1	K01530	probable phospholipid-transporting ATPase IF	3.64877
TRINITY_DN97724_c1_g1_i1	---NA---	lysosome-associated membrane glyco 1-like	3.64147
TRINITY_DN133961_c6_g2_i3	K18061	myotubularin-related 13-like	3.63574
TRINITY_DN89405_c0_g1_i1	K08111	Glypican- partial	3.6319
TRINITY_DN126174_c0_g1_i1	K05210	glutamate receptor NMDA 2B-like	3.63072
TRINITY_DN120145_c0_g1_i1	---NA---	hypothetical protein CAPTEDRAFT_91083	3.63072
TRINITY_DN135298_c0_g3_i1	---NA---	predicted protein	3.63072
TRINITY_DN32197_c0_g1_i1	K03110	signal recognition particle-docking	3.63072
TRINITY_DN88216_c0_g1_i1	---NA---	snake venom metalloprotease inhibitor 02A10-like	3.63005
TRINITY_DN136230_c3_g5_i1	---NA---	hypothetical protein MB9_1171	3.62372
TRINITY_DN135229_c4_g1_i2	---NA---	PREDICTED: uncharacterized protein LOC105326956	3.61316
TRINITY_DN121220_c1_g1_i2	---NA---	major facilitator superfamily domain-containing 10-like	3.60991
TRINITY_DN135361_c2_g8_i1	K19326	PREDICTED: nesprin-1-like	3.60574
TRINITY_DN134081_c1_g1_i1	K04533	hypothetical protein LOTGIDRAFT_160793	3.60506
TRINITY_DN134081_c1_g3_i1	K04533	PREDICTED: huntingtin-like	3.60451
TRINITY_DN133674_c1_g1_i1	---NA---	monocarboxylate transporter 12-like	3.60232
TRINITY_DN133322_c0_g1_i2	---NA---	phosphofurin acidic cluster sorting 2-like	3.60186
TRINITY_DN134122_c0_g2_i4	K08052	neurofibromin-like	3.60177
TRINITY_DN115212_c0_g1_i1	---NA---	AChain Crystal Structure Of Engineered Northeast Structural Genomics Consortium Target	3.59905
TRINITY_DN126095_c0_g1_i2	---NA---	hypothetical protein CAPTEDRAFT_209508	3.59891
TRINITY_DN135253_c1_g1_i1	---NA---	PREDICTED: uncharacterized protein LOC106814923	3.59631
TRINITY_DN132821_c0_g1_i1	---NA---	UPF0577 KIAA1324-like homolog	3.59607
TRINITY_DN126933_c1_g2_i1	K01128	acid sphingomyelinase-like phosphodiesterase 3b	3.59599
TRINITY_DN134971_c5_g2_i1	---NA---	lysosomal-trafficking regulator-like	3.592
TRINITY_DN136075_c7_g1_i2	---NA---	PREDICTED: uncharacterized protein LOC106175328	3.59185
TRINITY_DN89045_c0_g2_i1	---NA---	E3 ubiquitin- ligase RNF216-like	3.58862
TRINITY_DN135363_c1_g2_i1	---NA---	zinc finger 396	3.58506
TRINITY_DN134743_c0_g1_i1	---NA---	Low-density lipo receptor-related 6	3.58072
TRINITY_DN133587_c0_g1_i1	---NA---	pro-neuregulin- membrane-bound	3.57988
TRINITY_DN130287_c1_g1_i1	K00645	malonyl -ACP transacylase	3.57334
TRINITY_DN133504_c1_g2_i1	---NA---	ski oncogene-like	3.57334
TRINITY_DN171006_c0_g1_i1	---NA---	solute carrier family 23 member 1-like	3.57334
TRINITY_DN91963_c0_g2_i2	K17233	dual oxidase maturation factor 1-like	3.57037
TRINITY_DN129573_c0_g2_i1	K07249	aldehyde cytosolic partial	3.56828
TRINITY_DN132965_c2_g1_i3	---NA---	hypothetical protein GLOINDRAFT_25736	3.56745
TRINITY_DN64179_c0_g1_i1	K19402	Bardet-Biedl syndrome 12 homolog	3.56736
TRINITY_DN115244_c0_g1_i1	---NA---	PREDICTED: uncharacterized protein LOC106465811	3.56369
TRINITY_DN135453_c0_g2_i2	---NA---	WD repeat and FYVE domain-containing 3-like	3.56211
TRINITY_DN133779_c0_g2_i1	---NA---	scribble homolog	3.54786
TRINITY_DN112029_c0_g2_i1	---NA---	bone morphogenetic receptor type-2-like	3.54389
TRINITY_DN70910_c0_g1_i1	---NA---	membrane partial	3.54379
TRINITY_DN68058_c0_g1_i1	---NA---	prion-like-(Q N-rich) domain-bearing 25	3.54379
TRINITY_DN145591_c0_g1_i1	---NA---	TPA: calmodulin	3.54379
TRINITY_DN136089_c1_g3_i1	---NA---	RNA-directed DNA polymerase from mobile element jockey- partial	3.53871
TRINITY_DN128844_c0_g1_i1	K01510	ectonucleoside triphosphate diphosphohydrolase 2-like	3.53869
TRINITY_DN130294_c0_g2_i1	---NA---	PREDICTED: laccase-5-like	3.53767
TRINITY_DN130640_c0_g1_i1	K16498	protocadherin beta-15-like	3.53675
TRINITY_DN134039_c7_g9_i2	---NA---	RE1-silencing transcription factor	3.53059
TRINITY_DN126314_c0_g2_i3	K15377	choline transporter 2	3.52222
TRINITY_DN135706_c0_g1_i1	---NA---	PREDICTED: uncharacterized protein K02A2.6-like	3.51363
TRINITY_DN112959_c0_g1_i1	---NA---	4Fe-4S ferredoxin	3.5136
TRINITY_DN63501_c0_g2_i1	---NA---	ATPase P	3.5136
TRINITY_DN65200_c0_g1_i1	---NA---	diacylglycerol kinase zeta-like	3.5136
TRINITY_DN99577_c0_g1_i1	---NA---	ETS-related transcription factor Elf-2-like	3.5136
TRINITY_DN134601_c0_g2_i5	---NA---	hypothetical protein BRAFLDRAFT_126413	3.51357
TRINITY_DN123467_c0_g2_i1	---NA---	cytoplasmic polyadenylation element-binding 2-like	3.5115
TRINITY_DN80587_c0_g2_i2	K14445	solute carrier family 13 member 5-like	3.51121
TRINITY_DN133553_c0_g1_i2	---NA---	c-binding -like	3.50878
TRINITY_DN133561_c0_g3_i1	---NA---	RNA-directed DNA polymerase from mobile element jockey-like	3.5081
TRINITY_DN128329_c0_g2_i2	K00472	prolyl 4-hydroxylase subunit alpha-1-like	3.50201
TRINITY_DN112381_c0_g1_i2	---NA---	PREDICTED: uncharacterized protein LOC105331822	3.49901
TRINITY_DN90147_c0_g2_i1	---NA---	TNF receptor-associated factor 3-like	3.49604
TRINITY_DN116067_c0_g2_i1	---NA---	probable methyltransferase TARBP1	3.4811
TRINITY_DN123285_c0_g1_i2	---NA---	sodium-dependent proline transporter-like	3.4723
TRINITY_DN134520_c2_g1_i2	---NA---	coiled-coil domain-containing 180	3.4583
TRINITY_DN111981_c1_g2_i1	---NA---	PREDICTED: uncharacterized protein LOC101852611	3.45732
TRINITY_DN129941_c0_g1_i1	K11536	solute carrier family 28 member 3-like	3.4522
TRINITY_DN119832_c1_g1_i1	---NA---	ankyrin repeat	3.4513
TRINITY_DN159761_c0_g1_i1	---NA---	IQ motif and ankyrin repeat domain-containing	3.4513
TRINITY_DN134928_c0_g4_i1	---NA---	RNA polymerase II elongation factor ELL-like	3.4513
TRINITY_DN135822_c1_g1_i4	K04608	Metabotropic glutamate receptor 7	3.45122
TRINITY_DN134881_c11_g4_i1	K19871	Sal 3	3.45032
TRINITY_DN135845_c2_g4_i1	---NA---	PREDICTED: uncharacterized protein LOC106129371	3.44774
TRINITY_DN133536_c4_g2_i1	---NA---	major facilitator superfamily domain-containing 4-like	3.44646
TRINITY_DN136063_c3_g4_i2	---NA---	predicted protein	3.44112
TRINITY_DN134797_c3_g1_i1	---NA---	Metabotropic glutamate receptor 7	3.43888
TRINITY_DN117208_c0_g1_i1	K14388	sodium-coupled monocarboxylate transporter 1-like	3.43462
TRINITY_DN134881_c11_g1_i2	K19871	sal 1	3.42087
TRINITY_DN188072_c0_g1_i1	K01937	CTP synthetase	3.41909
TRINITY_DN126090_c0_g1_i2	---NA---	probable inactive serine threonine- kinase DDB_G0274613	3.41773
TRINITY_DN134764_c1_g1_i2	---NA---	hypothetical protein LOTGIDRAFT_234316	3.41319
TRINITY_DN133340_c1_g3_i2	---NA---	rap guanine nucleotide exchange factor 4-like	3.40564
TRINITY_DN127632_c0_g1_i1	---NA---	cadherin-23-like	3.40372
TRINITY_DN136184_c2_g2_i1	---NA---	RNA-directed DNA polymerase from mobile element partial	3.40202
TRINITY_DN132755_c0_g2_i1	---NA---	nuclease HARBI1	3.40178
TRINITY_DN133373_c3_g5_i1	---NA---	plexin domain-containing 2-like	3.40054
TRINITY_DN135673_c4_g7_i2	---NA---	PREDICTED: uncharacterized protein LOC106814923	3.39928
TRINITY_DN97338_c0_g2_i1	---NA---	hypothetical protein LOTGIDRAFT_233867	3.39621
TRINITY_DN107784_c2_g1_i1	---NA---	solute carrier family 23 member 1-like	3.38617
TRINITY_DN126174_c1_g3_i1	---NA---	glutamate receptor NMDA 2B-like	3.38511
TRINITY_DN134590_c0_g5_i3	---NA---	multiple epidermal growth factor-like domains 10	3.38474
TRINITY_DN120864_c1_g2_i2	---NA---	solute carrier family 40 member 1	3.38244
TRINITY_DN136084_c1_g5_i2	---NA---	mucin-4- partial	3.37388
TRINITY_DN128225_c0_g2_i3	---NA---	predicted protein	3.37106
TRINITY_DN135917_c7_g2_i5	---NA---	RNA-directed DNA polymerase from mobile element jockey-like	3.37075
TRINITY_DN136164_c2_g5_i2	---NA---	PREDICTED: uncharacterized protein LOC106175329	3.36985
TRINITY_DN117945_c0_g1_i1	K01242	ADP-ribosyl cyclase-like	3.36854
TRINITY_DN130074_c0_g1_i1	K05641	ATP-binding cassette sub-family A member 1	3.36412
TRINITY_DN84050_c0_g1_i1	---NA---	complement C1q 4	3.35247
TRINITY_DN72331_c0_g1_i1	K01507	inorganic pyrophosphatase	3.35247
TRINITY_DN115344_c2_g1_i1	---NA---	rho guanine nucleotide exchange factor 17-like	3.35247
TRINITY_DN112360_c0_g1_i2	K09093	aryl hydrocarbon receptor	3.3515
TRINITY_DN102588_c0_g1_i1	---NA---	secreted protein	3.35106
TRINITY_DN135551_c0_g1_i2	---NA---	PREDICTED: uncharacterized protein LOC105317732	3.34831
TRINITY_DN116655_c0_g1_i1	---NA---	PREDICTED: uncharacterized protein LOC105331591	3.34591
TRINITY_DN123806_c1_g2_i3	---NA---	PREDICTED: uncharacterized protein LOC106067829	3.34385
TRINITY_DN136065_c0_g3_i2	---NA---	predicted protein	3.34358
TRINITY_DN108239_c0_g1_i1	---NA---	sensory transduction histidine kinase	3.34296
TRINITY_DN133352_c3_g4_i1	---NA---	mannan polymerase complex subunit mnn9-like	3.33678
TRINITY_DN2725_c0_g1_i1	---NA---	myosin-14-like	3.33672
TRINITY_DN92122_c1_g1_i1	K17951	cytochrome P450 10-like	3.33449
TRINITY_DN133619_c0_g1_i2	---NA---	attractin 1	3.3322
TRINITY_DN130053_c0_g4_i1	K10649	E3 ubiquitin- ligase TRIM9-like	3.33106
TRINITY_DN112029_c0_g5_i1	K04671	Bone morphogenetic receptor type-2	3.33067
TRINITY_DN134681_c0_g3_i2	K19527	vacuolar sorting-associated 13D-like	3.33003
TRINITY_DN79736_c0_g1_i3	---NA---	ceramide phosphoethanolamine synthase-like	3.3293
TRINITY_DN130146_c1_g2_i1	K09186	histone-lysine N-methyltransferase 2A-like	3.32654
TRINITY_DN129787_c2_g1_i1	---NA---	PREDICTED: uncharacterized protein LOC105337439	3.32648
TRINITY_DN132186_c0_g3_i1	---NA---	glutamate receptor 4-like	3.32485
TRINITY_DN91417_c0_g1_i1	---NA---	hypothetical protein CGI_10024573	3.32435
TRINITY_DN73519_c0_g1_i1	---NA---	protocadherin beta-11-like	3.32281
TRINITY_DN44219_c0_g1_i1	---NA---	zinc finger 2 homolog	3.32281
TRINITY_DN133914_c0_g2_i2	---NA---	FYVE and coiled-coil domain-containing 1	3.32247
TRINITY_DN408_c0_g1_i1	---NA---	integrase core domain	3.31797
TRINITY_DN32328_c0_g1_i1	---NA---	leucine-rich repeat-containing 15-like	3.31797
TRINITY_DN22396_c0_g1_i1	---NA---	metal tolerance 9-like	3.31797
TRINITY_DN131963_c2_g1_i1	---NA---	MLP_ACRMI ame: Full=Mucin	3.31797
TRINITY_DN17002_c0_g1_i1	K01929	UDP-N-acetylmuramoyl-tripeptide--D-alanyl-D-alanine ligase	3.31797
TRINITY_DN134502_c3_g5_i1	---NA---	dmX 1	3.31768
TRINITY_DN135201_c0_g4_i5	---NA---	PREDICTED: uncharacterized protein LOC106013205	3.31764
TRINITY_DN134833_c0_g1_i3	---NA---	PREDICTED: uncharacterized protein LOC100370604, partial	3.3149
TRINITY_DN136040_c5_g4_i1	---NA---	PREDICTED: uncharacterized protein LOC106170168	3.31389
TRINITY_DN135810_c1_g2_i1	---NA---	RNA-directed DNA polymerase from mobile element jockey-like	3.31187
TRINITY_DN126848_c1_g1_i2	---NA---	cell surface glyco 1-like	3.31149
TRINITY_DN134918_c3_g1_i2	---NA---	Retrovirus-related Pol poly from transposon partial	3.31149
TRINITY_DN136204_c1_g1_i1	K17592	hypothetical protein CAPTEDRAFT_195081	3.31054
TRINITY_DN122779_c2_g2_i2	K02324	DNA polymerase epsilon catalytic subunit A-like	3.31035
TRINITY_DN131565_c1_g1_i1	---NA---	PREDICTED: uncharacterized protein LOC106808556	3.3092
TRINITY_DN135073_c0_g1_i4	---NA---	PREDICTED: uncharacterized protein LOC106816650	3.30105
TRINITY_DN132016_c1_g2_i1	---NA---	VWFA and cache domain-containing 1-like	3.30088
TRINITY_DN129680_c0_g1_i2	K00551	phosphatidylethanolamine N-methyltransferase-like	3.30032
TRINITY_DN207502_c0_g1_i1	K00714	wingless-type MMTV integration site member 8 precursor	3.30032
TRINITY_DN134951_c1_g2_i1	---NA---	PREDICTED: uncharacterized protein LOC105438389	3.29948
TRINITY_DN126913_c0_g1_i1	---NA---	thyroid adenoma-associated homolog	3.29331
TRINITY_DN133352_c3_g3_i1	---NA---	mannan polymerase complex subunit mnn9-like	3.29111
TRINITY_DN125579_c0_g2_i2	K14716	zinc transporter ZIP10-like	3.28913
TRINITY_DN100293_c0_g1_i3	---NA---	PREDICTED: uncharacterized protein LOC106476791	3.2858
TRINITY_DN132269_c2_g2_i7	---NA---	PREDICTED: uncharacterized protein LOC105321006	3.28322
TRINITY_DN133794_c1_g1_i6	K11427	histone-lysine N- H3 lysine-79 specific-like	3.28275
TRINITY_DN214447_c0_g1_i1	---NA---	ankyrin repeat and MYND domain-containing 2-like	3.28264
TRINITY_DN128263_c1_g1_i1	---NA---	PREDICTED: hyalin-like	3.28249
TRINITY_DN134035_c0_g1_i1	---NA---	ankyrin repeat-containing	3.27797
TRINITY_DN135555_c8_g4_i1	---NA---	NACHT and WD repeat domain-containing 1-like	3.27599
TRINITY_DN136225_c5_g1_i4	---NA---	hypothetical protein BRAFLDRAFT_72537	3.27544
TRINITY_DN84541_c0_g1_i3	---NA---	dehydrogenase reductase SDR family member 11-like	3.27431
TRINITY_DN129342_c1_g3_i4	---NA---	arf-GAP with Rho-GAP ANK repeat and PH domain-containing 2-like	3.27261
TRINITY_DN131446_c0_g4_i1	---NA---	HECT domain containing	3.26868
TRINITY_DN122961_c0_g1_i1	---NA---	predicted protein	3.26496
TRINITY_DN131996_c1_g1_i1	K05627	brain-specific angiogenesis inhibitor 1-associated 2-like	3.26466
TRINITY_DN133389_c6_g1_i1	---NA---	myb-related A-like	3.25924
TRINITY_DN129098_c0_g1_i1	---NA---	tumor necrosis factor	3.25238
TRINITY_DN133462_c0_g1_i5	---NA---	probable helicase with zinc finger domain	3.24785
TRINITY_DN132260_c0_g2_i1	---NA---	leucine-rich repeats and immunoglobulin-like domains 3	3.24767
TRINITY_DN132037_c0_g2_i1	---NA---	zinc finger 624	3.24667
TRINITY_DN129573_c0_g4_i1	---NA---	aldehyde dehydrogenase mitochondrial-like	3.2464
TRINITY_DN133658_c2_g2_i2	---NA---	D-octopine partial	3.2464
TRINITY_DN123452_c0_g1_i1	---NA---	hypothetical protein X975_19061, partial	3.2464
TRINITY_DN54368_c0_g1_i1	---NA---	Outer membrane	3.2464
TRINITY_DN118645_c0_g1_i1	---NA---	PREDICTED: uncharacterized protein LOC105338166	3.2464
TRINITY_DN133058_c0_g3_i2	---NA---	serine-rich adhesin for platelets-like	3.2457
TRINITY_DN128298_c1_g2_i1	K00911	inositol-trisphosphate 3-kinase A-like	3.24196
TRINITY_DN133277_c0_g1_i1	---NA---	PREDICTED: uncharacterized protein LOC106152279	3.23927
TRINITY_DN132506_c2_g2_i2	K10779	transcriptional regulator ATRX-like	3.23884
TRINITY_DN132080_c1_g2_i1	K00858	NAD kinase-like	3.23816
TRINITY_DN136242_c2_g1_i1	---NA---	PREDICTED: uncharacterized protein LOC100371179	3.23772
TRINITY_DN135666_c1_g2_i1	---NA---	TPR and ankyrin repeat-containing 1-like	3.2367
TRINITY_DN133621_c0_g2_i1	---NA---	terminal uridylyltransferase 4-like	3.23601
TRINITY_DN133726_c0_g3_i1	---NA---	ATP-binding cassette sub-family A member 2-like	3.23582
TRINITY_DN120427_c0_g1_i1	---NA---	EF-hand calcium-binding domain-containing 6-like	3.23303
TRINITY_DN134755_c2_g2_i2	---NA---	Y Chain E2~ubiquitin-Hect	3.23206
TRINITY_DN129427_c1_g3_i1	---NA---	B-cell lymphoma leukemia 11A-like	3.22957
TRINITY_DN133836_c0_g6_i6	---NA---	polycystin-1-like	3.22943
TRINITY_DN133238_c1_g2_i5	K17598	Synaptotagmin 5	3.22823
TRINITY_DN136050_c8_g1_i3	---NA---	E3 ubiquitin- ligase TRIM33-like	3.22789
TRINITY_DN24055_c0_g1_i1	K12035	E3 ubiquitin- ligase TRIM71-like	3.22569
TRINITY_DN134074_c0_g2_i1	---NA---	hypothetical protein CGI_10011202	3.22536
TRINITY_DN97865_c0_g1_i1	---NA---	zinc finger 628-like	3.22513
TRINITY_DN136057_c3_g1_i1	---NA---	PREDICTED: uncharacterized protein LOC106173528	3.22229
TRINITY_DN109305_c1_g1_i1	---NA---	octopamine receptor 2-like	3.22064
TRINITY_DN132488_c0_g1_i2	K18052	kinase C delta type-like	3.21969
TRINITY_DN135131_c0_g7_i1	K17849	probable E3 ubiquitin- ligase HECTD4	3.21962
TRINITY_DN136055_c1_g7_i1	---NA---	52 kDa repressor of the inhibitor of the kinase-like	3.21781
TRINITY_DN121980_c1_g1_i1	---NA---	ventricular zone-expressed PH domain-containing homolog 1-like	3.21311
TRINITY_DN4832_c0_g1_i2	K20687	SH3 domain-containing guanine exchange factor	3.21165
TRINITY_DN128725_c0_g2_i1	K05546	neutral alpha-glucosidase AB-like	3.20951
TRINITY_DN47163_c0_g1_i1	---NA---	inositol 1,4,5-trisphosphate receptor type 3-like	3.20925
TRINITY_DN109796_c0_g1_i1	---NA---	ski oncogene-like	3.20925
TRINITY_DN36_c0_g2_i1	K00791	tRNA delta(2)-isopentenylpyrophosphate transferase	3.20925
TRINITY_DN125187_c0_g1_i1	---NA---	tumor necrosis factor receptor superfamily member 6	3.20925
TRINITY_DN85330_c0_g1_i1	K20635	rho GTPase-activating 11A-like	3.20593
TRINITY_DN15419_c0_g1_i1	---NA---	NXPE family member 3-like	3.20591
TRINITY_DN134980_c2_g3_i1	K17602	YLP motif-containing 1-like	3.20562
TRINITY_DN135978_c1_g2_i3	---NA---	PREDICTED: uncharacterized protein LOC106879765	3.20421
TRINITY_DN135178_c0_g1_i2	---NA---	pro convertase subtilisin kexintype 5 partial	3.20154
TRINITY_DN135826_c1_g4_i5	---NA---	piggyBac transposable element-derived 4-like	3.20096
TRINITY_DN51623_c0_g1_i1	---NA---	PREDICTED: uncharacterized protein LOC106805847	3.19806
TRINITY_DN123460_c1_g1_i1	---NA---	Tripartite motif-containing 59	3.19563
TRINITY_DN135252_c9_g2_i6	K14945	quaking-B-like	3.19461
TRINITY_DN135414_c1_g6_i2	---NA---	piggyBac transposable element-derived 4-like	3.19407
TRINITY_DN122384_c0_g4_i1	---NA---	E3 ubiquitin- ligase RNF213-like	3.19188
TRINITY_DN128274_c0_g1_i1	K16676	thyroid receptor-interacting 6-like	3.19158
TRINITY_DN134870_c1_g2_i1	K04958	inositol 1,4,5-trisphosphate receptor type 3-like	3.19053
TRINITY_DN110709_c0_g1_i1	---NA---	PREDICTED: uncharacterized protein LOC754648	3.18802
TRINITY_DN134039_c7_g8_i1	---NA---	serine-rich adhesin for platelets-like	3.18677
TRINITY_DN119832_c0_g1_i1	---NA---	ankyrin repeat	3.18449
TRINITY_DN131202_c0_g2_i1	---NA---	suprabasin	3.18354
TRINITY_DN135883_c2_g1_i2	---NA---	hypothetical protein BRAFLDRAFT_77075	3.1835
TRINITY_DN134220_c1_g3_i2	K06672	nipped-B	3.17804
TRINITY_DN130780_c0_g2_i1	---NA---	microtubule-associated futsch-like	3.17423
TRINITY_DN126420_c1_g4_i1	K18757	la-related 1B-like	3.17284
TRINITY_DN116384_c0_g1_i1	K00820	glutamine--fructose-6-phosphate aminotransferase	3.17112
TRINITY_DN103700_c0_g3_i1	---NA---	PREDICTED: uncharacterized protein LOC106180531	3.17112
TRINITY_DN135887_c3_g3_i1	---NA---	hypothetical protein X975_09790, partial	3.16824
TRINITY_DN126466_c0_g2_i1	---NA---	low-density lipo receptor-related 4-like	3.16729
TRINITY_DN61134_c1_g1_i2	---NA---	sulfate transporter-like	3.16607
TRINITY_DN133452_c4_g1_i3	K19347	SUN domain-containing 2-like	3.16293
TRINITY_DN135659_c2_g3_i1	K20776	hypothetical protein CGI_10022241	3.15476
TRINITY_DN14926_c0_g1_i1	---NA---	NACHT and WD repeat domain-containing 1	3.15008
TRINITY_DN135188_c2_g4_i2	---NA---	Pogo transposable element with partial	3.1476
TRINITY_DN127014_c0_g3_i2	---NA---	strawberry notch homolog 1-like	3.14559
TRINITY_DN129139_c3_g4_i1	K06709	lysine-specific demethylase 4B	3.14511
TRINITY_DN132591_c1_g1_i2	K00710	polypeptide N-acetylgalactosaminyltransferase 1-like	3.14058
TRINITY_DN133737_c1_g3_i3	---NA---	mediator of RNA polymerase II transcription subunit 13-like	3.13941
TRINITY_DN136159_c1_g4_i1	---NA---	hypothetical protein CGI_10001439	3.13862
TRINITY_DN132030_c3_g3_i1	---NA---	multiple epidermal growth factor-like domains 10	3.13496
TRINITY_DN135294_c0_g1_i2	---NA---	PREDICTED: uncharacterized protein LOC105331573	3.1325
TRINITY_DN126944_c1_g5_i1	K12325	atrial natriuretic peptide receptor 1-like	3.13194
TRINITY_DN119030_c0_g1_i1	K17847	forkhead box O-like	3.13194
TRINITY_DN123545_c0_g1_i1	---NA---	L _3	3.13194
TRINITY_DN87768_c0_g1_i1	---NA---	phthiocerol synthesis polyketide synthase type I -like	3.13194
TRINITY_DN118963_c0_g1_i1	---NA---	PREDICTED: protein Jade-1-like	3.13194
TRINITY_DN128855_c0_g1_i2	---NA---	PREDICTED: uncharacterized protein LOC104845737	3.13194
TRINITY_DN134232_c4_g7_i1	---NA---	titin-like	3.13194
TRINITY_DN133766_c2_g3_i1	---NA---	extracellular matrix FRAS1-like	3.13131
TRINITY_DN107006_c0_g1_i1	---NA---	Kyphoscoliosis peptidase	3.12696
TRINITY_DN80461_c0_g1_i1	---NA---	serine arginine repetitive matrix 1-like	3.12607
TRINITY_DN76324_c0_g1_i1	---NA---	zinc finger 596-like	3.12527
TRINITY_DN133570_c0_g1_i6	K16506	protocadherin Fat 1	3.12326
TRINITY_DN134427_c0_g1_i1	---NA---	neural-cadherin 2	3.12292
TRINITY_DN132508_c0_g4_i1	K06230	zinc finger GLI4-like	3.12217
TRINITY_DN132620_c2_g1_i1	---NA---	sex hormone-binding globulin-like	3.11961
TRINITY_DN133380_c0_g4_i2	---NA---	major facilitator superfamily domain-containing 6-like	3.1186
TRINITY_DN133370_c7_g3_i1	K01315	plasminogen	3.11695
TRINITY_DN133237_c2_g1_i1	K08554	steroid hormone receptor ERR2-like	3.11588
TRINITY_DN135788_c0_g1_i1	---NA---	Seminal vesicle major clotting	3.1125
TRINITY_DN127116_c1_g1_i1	---NA---	zinc finger 271-like	3.10959
TRINITY_DN127383_c1_g1_i2	K09675	galactose-3-O-sulfotransferase 2-like	3.10836
TRINITY_DN74917_c0_g1_i2	---NA---	cGMP-specific 3 ,5 -cyclic phosphodiesterase-like	3.10417
TRINITY_DN63083_c0_g2_i2	---NA---	ectonucleoside triphosphate diphosphohydrolase 3-like	3.10417
TRINITY_DN125079_c0_g1_i1	---NA---	neurobeachin-like	3.09783
TRINITY_DN134301_c3_g4_i1	---NA---	Rab effector	3.09676
TRINITY_DN83510_c1_g1_i1	---NA---	exodeoxyribonuclease V subunit gamma	3.09179
TRINITY_DN136401_c0_g1_i1	K01933	phosphoribosylaminoimidazole synthetase	3.09169
TRINITY_DN110945_c0_g2_i1	---NA---	PREDICTED: uncharacterized protein LOC105317086	3.09169
TRINITY_DN134929_c2_g3_i9	---NA---	PREDICTED: uncharacterized protein LOC105920576	3.08921
TRINITY_DN132989_c0_g2_i1	---NA---	tat binding 1 family partial	3.08598
TRINITY_DN111640_c0_g3_i2	K04428	mitogen-activated kinase kinase kinase 4-like	3.08544
TRINITY_DN127624_c0_g1_i1	K18655	ATP-dependent RNA helicase DDX19A-like	3.08439
TRINITY_DN133009_c0_g4_i1	---NA---	zinc finger 208-like	3.08263
TRINITY_DN121062_c0_g1_i1	---NA---	alpha beta hydrolase domain-containing 17B-like	3.08248
TRINITY_DN135688_c0_g2_i1	K16681	crumbs-like	3.07985
TRINITY_DN156959_c0_g1_i1	K05022	chloride intracellular channel	3.07339
TRINITY_DN131577_c0_g1_i5	---NA---	PREDICTED: uncharacterized protein LOC105335334	3.07285
TRINITY_DN128195_c0_g1_i1	---NA---	C-type lectin partial	3.0727
TRINITY_DN131717_c1_g2_i1	---NA---	hypothetical protein LOTGIDRAFT_238342	3.07134
TRINITY_DN135877_c1_g1_i2	---NA---	piggyBac transposable element-derived 4-like	3.06359
TRINITY_DN132676_c3_g3_i1	---NA---	receptor-type tyrosine- phosphatase T-like	3.06237
TRINITY_DN136045_c2_g2_i3	---NA---	hypothetical protein LOTGIDRAFT_161099	3.06143
TRINITY_DN122925_c0_g1_i1	K10645	E3 ubiquitin- ligase MIB2-like	3.05954
TRINITY_DN132350_c2_g1_i3	K19948	MICAL 1	3.05954
TRINITY_DN133822_c1_g1_i8	---NA---	slack	3.05705
TRINITY_DN124123_c0_g1_i1	---NA---	Multiple epidermal growth factor-like domains 6	3.05562
TRINITY_DN130952_c0_g1_i1	---NA---	sodium-dependent proline transporter-like	3.05556
TRINITY_DN134356_c1_g7_i1	---NA---	unnamed protein product	3.05395
TRINITY_DN97700_c0_g2_i1	---NA---	MAM and LDL-receptor class A domain-containing 2-like	3.05084
TRINITY_DN118863_c1_g2_i3	---NA---	hypothetical protein LOTGIDRAFT_157351	3.05028
TRINITY_DN157516_c0_g1_i1	---NA---	PREDICTED: interaptin-like	3.05028
TRINITY_DN107548_c0_g1_i1	---NA---	probable disease resistance At5g66900	3.05028
TRINITY_DN85586_c0_g1_i1	---NA---	Retrovirus-related Pol poly from transposon partial	3.05028
TRINITY_DN101122_c0_g2_i1	---NA---	zinc finger rotund-like	3.05028
TRINITY_DN135255_c2_g4_i4	K15127	transcriptional adapter 2-beta-like	3.04795
TRINITY_DN134468_c3_g1_i5	K20091	chromodomain-helicase-DNA-binding 1-like	3.04145
TRINITY_DN134536_c6_g7_i10	K06270	phosphatase 1 regulatory subunit 12A	3.03802
TRINITY_DN131122_c1_g1_i6	K07525	PREDICTED: uncharacterized protein LOC101858821	3.03607
TRINITY_DN134866_c1_g3_i1	---NA---	telomere-associated RIF1-like	3.03521
TRINITY_DN129612_c0_g2_i1	---NA---	E3 ubiquitin- ligase RNF213-like	3.03479
TRINITY_DN155253_c0_g1_i1	---NA---	PREDICTED: uncharacterized protein LOC105318792	3.03249
TRINITY_DN136103_c2_g1_i7	---NA---	PREDICTED: uncharacterized protein LOC105336973	3.03194
TRINITY_DN48038_c0_g1_i1	---NA---	Glutamine-rich partial	3.03159
TRINITY_DN87578_c0_g1_i1	K16755	coiled-coil domain-containing 61-like	3.02903
TRINITY_DN135707_c1_g1_i1	---NA---	RNA-directed DNA polymerase from mobile element jockey-like	3.02855
TRINITY_DN54221_c0_g1_i1	---NA---	early nodulin-75- partial	3.02697
TRINITY_DN131521_c0_g2_i1	K17495	von Willebrand factor type EGF and pentraxin domain-containing 1-like	3.02596
TRINITY_DN132815_c2_g4_i1	K01530	probable phospholipid-transporting ATPase VD	3.02586
TRINITY_DN135158_c0_g1_i1	---NA---	Retrovirus-related Pol poly from transposon 412	3.02371
TRINITY_DN134974_c2_g4_i1	---NA---	Three prime repair exonuclease 1	3.02222
TRINITY_DN134781_c3_g5_i1	---NA---	hypothetical protein CAPTEDRAFT_217367, partial	3.02192
TRINITY_DN136175_c3_g1_i2	---NA---	PREDICTED: uncharacterized protein LOC105893365	3.02009
TRINITY_DN134154_c8_g8_i1	K10382	microtubule-actin cross-linking factor	3.0187
TRINITY_DN132616_c1_g1_i1	---NA---	#NAME?	3.01837
TRINITY_DN44994_c0_g2_i1	K07970	beta-1,3-galactosyltransferase 1-like	3.01816
TRINITY_DN136158_c0_g1_i1	---NA---	RNA-directed DNA polymerase from mobile element jockey-like	3.01401
TRINITY_DN126725_c0_g1_i1	---NA---	hypothetical protein OCBIM_22029532mg	3.01348
TRINITY_DN130512_c0_g1_i1	---NA---	hypothetical protein OCBIM_22010670mg	3.01292
TRINITY_DN135555_c8_g3_i5	---NA---	NACHT and WD repeat domain-containing 1-like	3.0116
TRINITY_DN30747_c0_g1_i1	K15103	mitochondrial uncoupling 2-like	3.00994
TRINITY_DN134810_c3_g1_i2	---NA---	ras-related Rab-8A	3.00943
TRINITY_DN132360_c1_g2_i1	---NA---	guanine nucleotide exchange factor VAV3-like	3.00878
TRINITY_DN188117_c0_g1_i1	K00652	8-amino-7-oxononanoate synthase	3.00766
TRINITY_DN142205_c0_g1_i1	K11753	bifunctional riboflavin kinase FMN adenylyltransferase	3.00766
TRINITY_DN107446_c0_g2_i1	---NA---	hypothetical protein	3.00766
TRINITY_DN119451_c1_g1_i1	---NA---	piggyBac transposable element-derived 4-like	3.00766
TRINITY_DN48110_c0_g1_i1	---NA---	UPF0670 C8orf55	3.00766
TRINITY_DN128310_c1_g3_i2	K15370	inactive phospholipase C 2	3.00578
TRINITY_DN128291_c0_g1_i8	---NA---	G- coupled receptor 126-like	3.00532
TRINITY_DN133370_c7_g1_i1	---NA---	apolipo (a)-like	3.004
TRINITY_DN135706_c0_g15_i2	---NA---	PREDICTED: uncharacterized protein K02A2.6-like	3.00039
TRINITY_DN64652_c0_g3_i1	---NA---	platelet-derived growth factor receptor alpha-like	3.00031
TRINITY_DN61178_c0_g1_i1	---NA---	PREDICTED: uncharacterized protein LOC100888157	3.00031
TRINITY_DN131885_c0_g5_i1	---NA---	soluble guanylate cyclase 88E-like	3.00031
TRINITY_DN129334_c1_g1_i2	K06532	prominin-1-A-like	2.99927
TRINITY_DN53877_c0_g1_i1	K08190	monocarboxylate transporter 13-like	2.99903
TRINITY_DN80980_c0_g2_i1	K06093	partitioning defective 6 homolog beta-like	2.99903
TRINITY_DN120126_c0_g2_i1	K04712	sphingolipid delta(4)-desaturase DES1-like	2.99717
TRINITY_DN128128_c0_g1_i1	---NA---	patched domain-containing 2-like	2.99624
TRINITY_DN128263_c0_g2_i5	---NA---	hypothetical protein BRAFLDRAFT_98740	2.99278
TRINITY_DN135266_c0_g6_i1	---NA---	PREDICTED: uncharacterized protein LOC105349229	2.99168
TRINITY_DN133517_c2_g2_i4	---NA---	ral GTPase-activating subunit alpha-1-like	2.98988
TRINITY_DN122836_c0_g1_i2	K17461	reversion-inducing cysteine-rich with Kazal motifs-like	2.98795
TRINITY_DN132139_c0_g1_i2	---NA---	neurobeachin 1	2.98533
TRINITY_DN118438_c1_g3_i1	---NA---	Brain 44	2.98413
TRINITY_DN127981_c0_g2_i1	K15013	long-chain-fatty-acid-- ligase ACSBG2-like	2.98413
TRINITY_DN135562_c8_g4_i3	---NA---	genetic suppressor element 1-like	2.98339
TRINITY_DN135788_c3_g1_i2	---NA---	PREDICTED: uncharacterized protein LOC106816757	2.9811
TRINITY_DN75164_c0_g1_i1	---NA---	calmodulin 1	2.98109
TRINITY_DN19686_c0_g1_i1	---NA---	NS1, partial	2.98109
TRINITY_DN109113_c0_g1_i1	---NA---	Zinc finger MYM-type partial	2.97939
TRINITY_DN113810_c0_g1_i1	K09530	dnaJ homolog subfamily C member 10-like	2.9763
TRINITY_DN135117_c4_g1_i1	---NA---	potassium voltage-gated channel Shaw-like	2.97548
TRINITY_DN131076_c0_g1_i15	K04678	E3 ubiquitin- ligase SMURF2-like	2.97337
TRINITY_DN118107_c1_g1_i2	K10392	kinesin unc-104	2.97152
TRINITY_DN79278_c0_g2_i1	K04579	corticotropin-releasing factor receptor 2-like	2.96972
TRINITY_DN96577_c0_g1_i3	---NA---	leucine-rich repeat-containing partial	2.96811
TRINITY_DN124727_c0_g3_i1	---NA---	PREDICTED: protein FAM188A-like	2.96803
TRINITY_DN135453_c0_g3_i4	---NA---	WD repeat and FYVE domain-containing 3-like	2.96737
TRINITY_DN117210_c1_g1_i2	---NA---	von Willebrand factor D and EGF domain-containing -like	2.96598
TRINITY_DN59599_c0_g1_i1	---NA---	beta-adrenergic receptor kinase 2- partial	2.96374
TRINITY_DN131963_c2_g2_i1	---NA---	Hemicentin- partial	2.96374
TRINITY_DN79359_c0_g1_i7	---NA---	hypothetical protein GUITHDRAFT_83143	2.96374
TRINITY_DN131705_c1_g2_i1	K08730	phosphatidylserine synthase 2-like	2.96313
TRINITY_DN127755_c1_g1_i4	K15502	serine threonine- phosphatase 6 regulatory ankyrin repeat subunit A-like	2.95648
TRINITY_DN117986_c0_g1_i2	K17310	serum amyloid A	2.95518
TRINITY_DN123232_c1_g2_i2	---NA---	neuronal calcium sensor 2-like	2.95299
TRINITY_DN130548_c0_g5_i4	K10395	kinesin KIF21A	2.94685
TRINITY_DN124575_c1_g1_i4	---NA---	predicted protein	2.94671
TRINITY_DN108445_c0_g1_i1	K07893	GTP-binding ypt5-like	2.94626
TRINITY_DN132340_c0_g5_i2	K00106	xanthine dehydrogenase 1-like	2.94618
TRINITY_DN134050_c0_g5_i2	K09378	zinc finger homeobox 4-like	2.94391
TRINITY_DN131334_c0_g3_i10	K02098	spire 1	2.94279
TRINITY_DN134483_c1_g5_i3	---NA---	PREDICTED: uncharacterized protein LOC105342999	2.94159
TRINITY_DN130511_c0_g3_i1	---NA---	pro convertase subtilisin kexin type 4-like	2.94159
TRINITY_DN135887_c3_g1_i2	---NA---	hypothetical protein OCBIM_22022570mg	2.93788
TRINITY_DN130161_c1_g2_i1	---NA---	Poly [ADP-ribose] polymerase 12	2.93554
TRINITY_DN127187_c0_g3_i1	K12614	ATP-dependent RNA helicase cgh-1-like	2.93475
TRINITY_DN136236_c0_g2_i1	---NA---	PREDICTED: uncharacterized protein F54H12.2-like	2.93346
TRINITY_DN133699_c2_g5_i1	---NA---	Pleckstrin domain-containing family G member 1	2.93133
TRINITY_DN134781_c3_g4_i1	---NA---	hypothetical protein CAPTEDRAFT_217367, partial	2.92919
TRINITY_DN32487_c0_g1_i2	---NA---	PREDICTED: uncharacterized protein LOC106470073	2.92877
TRINITY_DN132215_c0_g1_i3	---NA---	glucan endo-1,3-alpha-glucosidase agn1	2.92313
TRINITY_DN135056_c0_g1_i1	K05473	TNF ligand-like 2	2.92256
TRINITY_DN134359_c3_g1_i3	---NA---	fibulin-1- partial	2.92158
TRINITY_DN131671_c0_g1_i1	---NA---	hypothetical protein LOTGIDRAFT_231644	2.92036
TRINITY_DN135780_c0_g1_i1	---NA---	hypothetical protein DAPPUDRAFT_102733	2.91856
TRINITY_DN204100_c0_g1_i1	---NA---	calcium sodium:proton antiporter	2.91846
TRINITY_DN116254_c0_g1_i1	K03879	NADH:ubiquinone oxidoreductase subunit N	2.91846
TRINITY_DN62969_c0_g1_i1	---NA---	peptidase S41	2.91846
TRINITY_DN75697_c1_g1_i1	---NA---	PREDICTED: uncharacterized protein LOC105333508	2.91846
TRINITY_DN134634_c3_g1_i1	---NA---	transcriptional coactivator YAP1- partial	2.91846
TRINITY_DN118239_c0_g2_i1	---NA---	Voltage-gated hydrogen channel 1	2.91702
TRINITY_DN124184_c0_g1_i1	---NA---	zinc finger 585A-like	2.91641
TRINITY_DN125569_c0_g1_i2	K06052	fibropellin-1- partial	2.91627
TRINITY_DN133513_c3_g4_i1	---NA---	gamma-glutamyltranspeptidase 1-like	2.91356
TRINITY_DN109067_c0_g1_i1	K19599	leukemia inhibitory factor receptor-like	2.91146
TRINITY_DN133766_c2_g5_i3	---NA---	Extracellular matrix FRAS1	2.90948
TRINITY_DN134361_c0_g5_i1	---NA---	Neurotrypsin	2.90906
TRINITY_DN126813_c0_g1_i9	K16617	collagen alpha-5(IV) chain-like	2.90712
TRINITY_DN133906_c5_g1_i7	---NA---	ganglioside GM2 activator	2.90566
TRINITY_DN133047_c1_g2_i1	---NA---	toll-like receptor 4	2.90474
TRINITY_DN134496_c0_g2_i1	---NA---	hypothetical protein LOTGIDRAFT_165489	2.90415
TRINITY_DN129423_c1_g1_i8	---NA---	limb region 1 homolog	2.90301
TRINITY_DN36817_c0_g1_i1	---NA---	hypothetical protein CGI_10011657	2.90239
TRINITY_DN128830_c2_g1_i1	---NA---	kinesin KIF12	2.90239
TRINITY_DN132651_c3_g3_i1	---NA---	transcription initiation factor TFIID subunit 1-like	2.90238
TRINITY_DN115368_c0_g3_i1	---NA---	hypothetical protein CGI_10019987	2.90236
TRINITY_DN85781_c0_g1_i1	K04150	5-hydroxytryptamine receptor 4-like	2.90188
TRINITY_DN121533_c0_g1_i1	---NA---	PREDICTED: uncharacterized protein LOC105322056	2.90112
TRINITY_DN123429_c0_g1_i2	K00710	polypeptide N-acetylgalactosaminyltransferase 10	2.90074
TRINITY_DN128697_c2_g1_i1	---NA---	transmembrane and TPR repeat-containing 3-like	2.89945
TRINITY_DN132983_c0_g2_i1	---NA---	toll-like receptor 13	2.89892
TRINITY_DN128795_c0_g1_i1	K09228	zinc finger Xfin-like	2.89378
TRINITY_DN132788_c0_g2_i1	---NA---	serine threonine- kinase 11-interacting -like	2.89236
TRINITY_DN135331_c5_g1_i1	---NA---	PREDICTED: uncharacterized protein LOC100570906	2.89113
TRINITY_DN134372_c2_g2_i2	---NA---	TSP 1 domain containing	2.89023
TRINITY_DN119533_c0_g1_i1	K10297	F-box only 11-like	2.88913
TRINITY_DN134973_c1_g2_i2	---NA---	zinc transporter ZIP14-like	2.88747
TRINITY_DN135178_c0_g2_i1	---NA---	cell death abnormality 1-like	2.88721
TRINITY_DN132722_c0_g1_i1	---NA---	PREDICTED: protein shisa-5-like	2.88234
TRINITY_DN136087_c1_g5_i2	---NA---	hypothetical protein BRAFLDRAFT_128105	2.88077
TRINITY_DN19328_c0_g1_i1	---NA---	PREDICTED: uncharacterized protein LOC101846089	2.87947
TRINITY_DN135231_c0_g1_i1	---NA---	Zinc-binding alcohol dehydrogenase domain-containing partial	2.87766
TRINITY_DN135694_c0_g1_i10	---NA---	PREDICTED: uncharacterized protein LOC106807252	2.87737
TRINITY_DN134321_c1_g2_i1	---NA---	von Willebrand factor type EGF and pentraxin domain-containing partial	2.87533
TRINITY_DN126174_c1_g2_i1	---NA---	glutamate receptor NMDA 2B-like	2.87449
TRINITY_DN91826_c0_g2_i1	---NA---	sodium- and chloride-dependent glycine transporter 1-like	2.87449
TRINITY_DN130332_c4_g2_i1	---NA---	sphingosine kinase 2	2.87449
TRINITY_DN132033_c1_g2_i1	---NA---	hypothetical protein LOTGIDRAFT_234975	2.87394
TRINITY_DN135972_c3_g8_i1	---NA---	helicase with zinc finger domain 2-like	2.87377
TRINITY_DN135323_c3_g2_i1	---NA---	hypothetical protein LOTGIDRAFT_164534	2.87294
TRINITY_DN132360_c1_g4_i2	K05730	vav-like	2.87285
TRINITY_DN102890_c0_g1_i1	---NA---	ATP-binding cassette sub-family E member 1	2.87171
TRINITY_DN106492_c0_g1_i1	---NA---	hypothetical protein SGPV204	2.87171
TRINITY_DN12156_c0_g2_i1	K12307	major facilitator superfamily domain-containing 8-like	2.87171
TRINITY_DN133180_c0_g2_i1	---NA---	neurogenic locus notch homolog 1-like	2.87171
TRINITY_DN45323_c0_g2_i1	---NA---	PREDICTED: calmodulin, partial	2.87171
TRINITY_DN126734_c0_g1_i1	---NA---	PREDICTED: uncharacterized protein LOC106152279	2.87171
TRINITY_DN172870_c0_g1_i1	---NA---	S1 RNA-binding domain-containing 1-like	2.87171
TRINITY_DN100043_c0_g2_i2	---NA---	serine racemase	2.87171
TRINITY_DN118530_c0_g1_i1	---NA---	PREDICTED: uncharacterized protein LOC105345013	2.86977
TRINITY_DN19238_c0_g1_i1	---NA---	protocadherin gamma-A12-like	2.86823
TRINITY_DN133623_c9_g1_i2	K10590	E3 ubiquitin- ligase TRIP12-like	2.86717
TRINITY_DN129516_c0_g2_i1	---NA---	zinc finger SWIM domain-containing 8-like	2.8671
TRINITY_DN136103_c1_g1_i1	K10693	E3 ubiquitin- ligase MYCBP2-like	2.86609
TRINITY_DN135195_c0_g1_i7	---NA---	PREDICTED: mucin-2-like	2.86478
TRINITY_DN133742_c0_g1_i2	---NA---	wings apart homolog	2.86446
TRINITY_DN89044_c0_g1_i1	---NA---	TBC1 domain family member 16-like	2.86158
TRINITY_DN133737_c1_g2_i2	K15164	mediator of RNA polymerase II transcription subunit 13-like	2.86139
TRINITY_DN132435_c1_g2_i5	K09536	dnaJ homolog subfamily C member 16-like	2.86124
TRINITY_DN132097_c1_g5_i3	---NA---	potassium voltage-gated channel subfamily H member 2-like	2.86067
TRINITY_DN134800_c0_g1_i1	---NA---	PREDICTED: uncharacterized protein LOC105326956	2.86044
TRINITY_DN132957_c1_g1_i1	K06753	roundabout homolog 1-like	2.8599
TRINITY_DN134241_c2_g2_i1	---NA---	PREDICTED: uncharacterized protein LOC106869289	2.85988
TRINITY_DN133364_c0_g1_i5	K18405	Tudor domain-containing 1	2.85836
TRINITY_DN134866_c1_g2_i1	K11138	telomere-associated RIF1-like	2.85732
TRINITY_DN134600_c1_g1_i4	---NA---	poly [ADP-ribose] polymerase 14- partial	2.85445
TRINITY_DN126445_c1_g2_i1	K17501	phosphatase 1F-like	2.8541
TRINITY_DN132813_c0_g1_i1	---NA---	PREDICTED: uncharacterized protein LOC106816458	2.8538
TRINITY_DN132616_c1_g2_i1	K05619	#NAME?	2.85298
TRINITY_DN128684_c0_g1_i1	---NA---	UPF0392 -like	2.85255
TRINITY_DN131753_c0_g3_i1	---NA---	PREDICTED: uncharacterized protein LOC105335865	2.85154
TRINITY_DN109067_c0_g3_i3	---NA---	leukemia inhibitory factor receptor-like	2.85055
TRINITY_DN135049_c2_g1_i8	---NA---	BAH and coiled-coil domain-containing 1	2.8505
TRINITY_DN94189_c0_g1_i1	---NA---	membrane partial	2.84883
TRINITY_DN132088_c0_g1_i2	K18405	tudor domain-containing 1-like	2.84705
TRINITY_DN130791_c0_g2_i1	---NA---	PDZ and LIM domain 3-like	2.84656
TRINITY_DN133165_c0_g1_i1	---NA---	transmembrane 117-like	2.84611
TRINITY_DN55035_c0_g1_i1	K00858	NAD kinase mitochondrial-like	2.84425
TRINITY_DN134468_c1_g1_i5	---NA---	chromodomain-helicase-DNA-binding 1-like	2.8412
TRINITY_DN135083_c0_g2_i4	---NA---	PREDICTED: uncharacterized protein LOC106815062	2.84089
TRINITY_DN106907_c0_g1_i1	---NA---	PQ-loop repeat-containing 3-like	2.84034
TRINITY_DN127124_c0_g2_i1	---NA---	protocadherin beta-15-like	2.83865
TRINITY_DN130356_c0_g2_i1	K16831	aurora borealis-like	2.83858
TRINITY_DN126324_c2_g1_i2	---NA---	PREDICTED: uncharacterized protein LOC106177189	2.8367
TRINITY_DN128619_c0_g2_i1	---NA---	Zinc finger partial	2.83584
TRINITY_DN125115_c0_g3_i1	---NA---	probable indole-3-acetic acid-amido synthetase	2.83337
TRINITY_DN94769_c0_g1_i1	K07846	GTP-binding GEM-like	2.83327
TRINITY_DN112746_c0_g2_i1	---NA---	Transposable element Tcb2 transposase	2.83324
TRINITY_DN133317_c3_g3_i1	---NA---	PREDICTED: uncharacterized protein LOC100570906	2.82982
TRINITY_DN135551_c0_g7_i1	---NA---	zinc finger	2.82982
TRINITY_DN126706_c0_g2_i2	K00472	prolyl 4-hydroxylase subunit alpha-1-like	2.82825
TRINITY_DN135741_c2_g3_i3	---NA---	serine threonine- kinase endoribonuclease IRE1	2.82792
TRINITY_DN134279_c1_g1_i1	K20056	PDZ domain-containing GIPC1-like	2.82776
TRINITY_DN134176_c3_g1_i1	K20685	guanine nucleotide exchange factor DBS-like	2.82759
TRINITY_DN118207_c1_g1_i2	---NA---	predicted protein	2.82699
TRINITY_DN115032_c0_g3_i1	---NA---	PREDICTED: protein FAM43A-like	2.8252
TRINITY_DN135640_c2_g4_i1	---NA---	isoform B	2.82342
TRINITY_DN125705_c0_g3_i1	---NA---	lysine-specific histone demethylase 1A-like	2.82342
TRINITY_DN64833_c0_g2_i1	---NA---	primosomal N	2.82342
TRINITY_DN131753_c2_g2_i1	---NA---	flocculation FLO11-like	2.82226
TRINITY_DN127124_c0_g1_i1	K16495	protocadherin beta-15-like	2.81874
TRINITY_DN131864_c4_g1_i1	K11449	probable domain-containing histone demethylation 2C	2.81846
TRINITY_DN64642_c0_g1_i1	---NA---	HKR1_YEAST ame	2.81809
TRINITY_DN120427_c0_g2_i1	---NA---	EF-hand calcium-binding domain-containing 6	2.81619
TRINITY_DN134870_c1_g1_i1	---NA---	inositol 1,4,5-trisphosphate receptor type 3-like	2.80876
TRINITY_DN55875_c0_g1_i1	---NA---	Retrovirus-related Pol poly from transposon partial	2.80876
TRINITY_DN134971_c5_g1_i2	---NA---	lysosomal-trafficking regulator-like	2.80866
TRINITY_DN136214_c6_g2_i2	---NA---	hypothetical protein	2.80839
TRINITY_DN42099_c0_g1_i1	---NA---	TAR DNA-binding 43-like	2.80803
TRINITY_DN130622_c1_g2_i1	---NA---	PREDICTED: uncharacterized protein LOC106011084	2.80771
TRINITY_DN128593_c2_g10_i1	---NA---	arf-GAP with Rho-GAP ANK repeat and PH domain-containing 2-like	2.80544
TRINITY_DN61254_c0_g1_i1	---NA---	isoform partial	2.80544
TRINITY_DN209006_c0_g1_i1	---NA---	sodium- and chloride-dependent GABA transporter 1-like	2.80108
TRINITY_DN135273_c0_g1_i1	---NA---	hypothetical protein N338_01720, partial	2.79882
TRINITY_DN124084_c4_g2_i1	---NA---	hypothetical protein CAPTEDRAFT_212883, partial	2.79865
TRINITY_DN156524_c0_g1_i1	---NA---	hypothetical protein HELRODRAFT_163955	2.79305
TRINITY_DN124130_c0_g1_i1	K16732	regulator of cytokinesis 1-like	2.79232
TRINITY_DN15552_c0_g1_i1	---NA---	mammalian ependymin-related 1-like	2.79005
TRINITY_DN131676_c0_g3_i2	---NA---	Tetratricopeptide repeat GNN	2.78954
TRINITY_DN44912_c0_g1_i1	---NA---	multidrug resistance-associated 1-like	2.78635
TRINITY_DN133468_c0_g4_i1	---NA---	PREDICTED: uncharacterized protein LOC105334921	2.78563
TRINITY_DN133065_c0_g1_i1	---NA---	nascent polypeptide-associated complex subunit muscle-specific form-like	2.78426
TRINITY_DN106456_c0_g2_i2	K20704	ECT2-like	2.78235
TRINITY_DN134928_c0_g2_i1	K15183	RNA polymerase II elongation factor ELL-like	2.78181
TRINITY_DN142915_c0_g1_i1	K06761	PREDICTED: contactin-like	2.78084
TRINITY_DN104465_c0_g2_i1	---NA---	glycosyltransferase sugar-binding containing DXD motif	2.78072
TRINITY_DN101610_c0_g1_i1	---NA---	acetylcholine receptor subunit alpha-like	2.78065
TRINITY_DN126436_c0_g1_i1	K17277	epidermal growth factor receptor kinase substrate 8-like	2.77955
TRINITY_DN123266_c1_g1_i3	---NA---	ABC transporter G family member 3- partial	2.77721
TRINITY_DN131202_c0_g3_i1	---NA---	PREDICTED: uncharacterized protein LOC106883396	2.77595
TRINITY_DN133726_c0_g4_i2	K05642	ATP-binding cassette sub-family A member 2-like	2.7744
TRINITY_DN51816_c0_g1_i1	---NA---	alanine racemase	2.77344
TRINITY_DN106221_c0_g1_i1	---NA---	hypothetical protein NEMVEDRAFT_v1g147068	2.77344
TRINITY_DN133872_c0_g3_i1	---NA---	inactive ubiquitin carboxyl-terminal hydrolase 54- partial	2.77344
TRINITY_DN131279_c0_g6_i1	---NA---	phosphatidylinositol 4-phosphate 5-kinase type-1 alpha-like	2.77344
TRINITY_DN12673_c0_g1_i1	---NA---	PREDICTED: uncharacterized protein LOC106180058	2.77344
TRINITY_DN2679_c0_g2_i1	K07756	inositol hexakisphosphate kinase 1	2.77308
TRINITY_DN129349_c0_g1_i2	K09275	transcription factor CP2-like	2.77047
TRINITY_DN127790_c3_g2_i1	K12366	engulfment and cell motility 1-like	2.769
TRINITY_DN130636_c3_g1_i1	K06820	plexin-A2-like	2.7677
TRINITY_DN135166_c0_g4_i1	---NA---	hypothetical protein LOTGIDRAFT_166572	2.76725
TRINITY_DN136090_c1_g1_i1	---NA---	ribonuclease HI	2.76165
TRINITY_DN136097_c3_g4_i3	---NA---	RNA-directed DNA polymerase from mobile element jockey- partial	2.76106
TRINITY_DN135761_c0_g2_i1	---NA---	zinc finger 862-like	2.76063
TRINITY_DN136180_c1_g3_i3	---NA---	PREDICTED: uncharacterized protein LOC105439418	2.76008
TRINITY_DN132366_c1_g2_i1	K13411	dual oxidase-like	2.75999
TRINITY_DN133775_c0_g1_i2	---NA---	translational activator GCN1-like	2.75718
TRINITY_DN94902_c2_g1_i1	---NA---	PREDICTED: uncharacterized protein LOC106874115	2.75543
TRINITY_DN128380_c0_g1_i1	---NA---	sal 4	2.75473
TRINITY_DN134797_c3_g3_i2	---NA---	Metabotropic glutamate receptor 7	2.7543
TRINITY_DN135954_c1_g1_i8	---NA---	PREDICTED: uncharacterized protein LOC105440841	2.75221
TRINITY_DN129973_c1_g1_i1	---NA---	deleted in malignant brain tumors 1 -like	2.75205
TRINITY_DN131686_c0_g2_i17	K20125	FCH and double SH3 domains 2-like	2.75194
TRINITY_DN135958_c0_g2_i4	---NA---	reverse transcriptase	2.75131
TRINITY_DN135935_c0_g1_i1	---NA---	PREDICTED: uncharacterized protein LOC106170666	2.75123
TRINITY_DN99216_c0_g1_i1	K03544	ATP-dependent Clp protease ATP-binding subunit clpX- mitochondrial	2.75109
TRINITY_DN88883_c0_g2_i2	---NA---	hypothetical protein, partial	2.7468
TRINITY_DN134637_c4_g1_i1	---NA---	multiple epidermal growth factor-like domains 8	2.74614
TRINITY_DN129579_c1_g3_i1	K19937	rab3 GTPase-activating non-catalytic subunit-like	2.74468
TRINITY_DN128285_c2_g2_i1	K20030	palmitoyltransferase ZDHHC5-like	2.74463
TRINITY_DN108931_c0_g1_i1	K19949	otoferlin-like	2.74265
TRINITY_DN135337_c2_g1_i1	---NA---	predicted protein	2.7399
TRINITY_DN133047_c1_g1_i1	---NA---	toll-like receptor m	2.73942
TRINITY_DN129413_c0_g1_i9	K04352	ras GTPase-activating 1-like	2.73797
TRINITY_DN132128_c0_g1_i3	K08842	dual specificity testis-specific kinase 2-like	2.73503
TRINITY_DN136058_c0_g6_i1	---NA---	Retrovirus-related Pol poly from transposon 412	2.73413
TRINITY_DN135834_c1_g2_i8	---NA---	L1-encoded reverse transcriptase	2.73226
TRINITY_DN134376_c8_g2_i1	---NA---	hypothetical protein CGI_10017776	2.73039
TRINITY_DN96706_c0_g1_i1	---NA---	hypothetical protein GLOINDRAFT_87276	2.72976
TRINITY_DN136054_c2_g5_i1	---NA---	zinc finger 862-like	2.72754
TRINITY_DN75197_c0_g1_i1	---NA---	BTB POZ domain-containing 17-like	2.7275
TRINITY_DN132360_c1_g1_i2	K05730	Guanine nucleotide exchange factor VAV2	2.72682
TRINITY_DN33824_c0_g1_i1	K07611	lamin-B1- partial	2.72654
TRINITY_DN207746_c0_g1_i1	---NA---	citron Rho-interacting kinase-like	2.72291
TRINITY_DN79628_c1_g1_i1	---NA---	Cysteine- acidic integral membrane partial	2.72291
TRINITY_DN115012_c0_g1_i1	---NA---	golgi reassembly-stacking	2.7217
TRINITY_DN51737_c0_g1_i1	---NA---	hypothetical protein	2.7217
TRINITY_DN15007_c0_g1_i1	---NA---	NF-X1-type zinc finger NFXL2-like	2.7217
TRINITY_DN80433_c0_g1_i1	---NA---	predicted protein	2.7217
TRINITY_DN121947_c2_g2_i1	---NA---	PREDICTED: uncharacterized protein F54H12.2-like	2.7217
TRINITY_DN39350_c0_g1_i1	---NA---	PREDICTED: uncharacterized protein LOC105440841	2.7217
TRINITY_DN188918_c0_g1_i1	---NA---	Retrovirus-related Pol poly from transposon partial	2.7217
TRINITY_DN192523_c0_g1_i1	K07056	rRNA (cytidine-2 -O-)-methyltransferase	2.7217
TRINITY_DN111674_c1_g1_i1	---NA---	hypothetical protein JH06_3373	2.7208
TRINITY_DN124100_c0_g1_i1	---NA---	Paraneoplastic antigen 5	2.72033
TRINITY_DN135092_c0_g1_i1	---NA---	laccase-2-like	2.71875
TRINITY_DN134755_c2_g1_i1	---NA---	poly [ADP-ribose] polymerase 14-like	2.71838
TRINITY_DN122357_c0_g4_i1	K14402	cleavage and polyadenylation specificity factor subunit 2-like	2.7143
TRINITY_DN109394_c0_g2_i1	K09040	nuclear factor erythroid 2-related factor 2- partial	2.71277
TRINITY_DN135560_c0_g1_i4	---NA---	piggyBac transposable element-derived 4-like	2.71004
TRINITY_DN135689_c1_g5_i1	---NA---	RNA-directed DNA polymerase from mobile element jockey-like	2.70867
TRINITY_DN133282_c0_g2_i1	---NA---	slit homolog 1 -like	2.70784
TRINITY_DN54551_c0_g2_i1	K11981	E3 ubiquitin- ligase NRDP1-like	2.70752
TRINITY_DN128847_c3_g2_i1	---NA---	MOB kinase activator 2-like	2.70638
TRINITY_DN133952_c2_g1_i1	---NA---	zinc finger 208-like	2.70524
TRINITY_DN131778_c0_g2_i4	K05038	sodium- and chloride-dependent glycine transporter 2-like	2.70183
TRINITY_DN131274_c0_g1_i3	---NA---	very KIND-like	2.70103
TRINITY_DN125509_c0_g1_i1	---NA---	PREDICTED: uncharacterized protein KIAA1467 homolog	2.70091
TRINITY_DN126725_c2_g1_i1	---NA---	PREDICTED: uncharacterized protein LOC105440841	2.69996
TRINITY_DN122455_c0_g2_i1	---NA---	PREDICTED: uncharacterized protein LOC105317104	2.69872
TRINITY_DN92613_c0_g1_i3	K18710	histone RNA hairpin-binding	2.69132
TRINITY_DN132654_c0_g1_i3	K11255	nuclear receptor coactivator 2-like	2.68818
TRINITY_DN126176_c0_g2_i4	---NA---	PREDICTED: uncharacterized protein LOC105319134	2.68708
TRINITY_DN106480_c1_g2_i3	K05679	ATP-binding cassette sub-family G member 4-like	2.68628
TRINITY_DN135594_c2_g2_i2	---NA---	hypothetical protein CGI_10008439	2.68533
TRINITY_DN134391_c2_g2_i2	---NA---	EH domain-binding 1-like	2.68419
TRINITY_DN132540_c0_g1_i1	K14314	nuclear pore membrane glyco 210-like	2.68412
TRINITY_DN135299_c10_g3_i1	---NA---	PREDICTED: uncharacterized protein LOC105438389	2.67977
TRINITY_DN132821_c0_g2_i1	---NA---	UPF0577 KIAA1324-like homolog	2.67927
TRINITY_DN134594_c1_g2_i1	K10366	dystrophin-like	2.67524
TRINITY_DN136215_c3_g7_i3	---NA---	probable serine threonine- kinase pats1	2.67464
TRINITY_DN128188_c0_g2_i2	---NA---	ankyrin repeat and fibronectin type-III domain-containing 1-like	2.67332
TRINITY_DN109337_c0_g2_i1	K09097	aryl hydrocarbon receptor nuclear translocator	2.67236
TRINITY_DN133621_c0_g5_i1	---NA---	terminal uridylyltransferase 4-like	2.67201
TRINITY_DN134929_c2_g2_i1	---NA---	E3 ubiquitin- ligase RNF213-like	2.67052
TRINITY_DN130511_c0_g1_i3	K08654	Pro convertase subtilisin kexin type 5	2.67026
TRINITY_DN67292_c0_g2_i2	---NA---	basic proline-rich - partial	2.66802
TRINITY_DN108430_c0_g1_i3	---NA---	collagen triple helix repeat	2.66802
TRINITY_DN131367_c1_g3_i1	---NA---	mitogen-activated kinase kinase kinase 15-like	2.66802
TRINITY_DN114004_c0_g1_i1	---NA---	predicted protein	2.66802
TRINITY_DN90222_c1_g1_i1	---NA---	Retrovirus-related Pol poly from transposon partial	2.66802
TRINITY_DN73707_c0_g1_i1	K05837	rod shape-determining	2.66802
TRINITY_DN135543_c6_g2_i6	---NA---	helicase with zinc finger domain 2-like	2.668
TRINITY_DN90873_c0_g1_i1	---NA---	solute carrier family 22 member 6-A- partial	2.66787
TRINITY_DN74095_c0_g1_i1	---NA---	PREDICTED: uncharacterized protein LOC106942710, partial	2.6667
TRINITY_DN133009_c0_g1_i2	---NA---	gastrula zinc finger -like	2.66564
TRINITY_DN96069_c0_g1_i1	K08632	A disintegrin and metallo ase with thrombospondin motifs 16	2.65771
TRINITY_DN130429_c0_g6_i2	K08670	suppressor of tumorigenicity 14 homolog	2.65638
TRINITY_DN114303_c0_g1_i5	K16308	citron Rho-interacting kinase-like	2.65335
TRINITY_DN99033_c0_g2_i1	K07809	heparan sulfate glucosamine 3-O-sulfotransferase 3A1	2.65163
TRINITY_DN18826_c0_g1_i1	---NA---	amalgam-like	2.65159
TRINITY_DN125717_c0_g1_i1	---NA---	kinesin KIF28P	2.65028
TRINITY_DN118107_c1_g2_i1	---NA---	kinesin unc-104	2.65028
TRINITY_DN116945_c0_g2_i1	---NA---	PREDICTED: uncharacterized protein LOC105318792	2.64992
TRINITY_DN131277_c0_g1_i2	---NA---	exosome complex exonuclease RRP44	2.6492
TRINITY_DN132099_c0_g1_i1	---NA---	zinc finger ZZ-type and EF-hand domain-containing 1-like	2.64779
TRINITY_DN135070_c3_g2_i1	---NA---	PREDICTED: uncharacterized protein LOC100574845	2.64693
TRINITY_DN135551_c0_g4_i3	---NA---	hypothetical protein RF55_25379, partial	2.64688
TRINITY_DN123245_c0_g1_i1	K13748	alpha-1,3-mannosyl-glyco 4-beta-N-acetylglucosaminyltransferase C-like	2.64441
TRINITY_DN135523_c0_g1_i3	---NA---	PREDICTED: uncharacterized protein LOC105335612	2.64359
TRINITY_DN96125_c0_g2_i1	K13990	formimidoyltransferase-cyclodeaminase-like	2.64264
TRINITY_DN126550_c0_g1_i1	K06115	spectrin beta non-erythrocytic 5-like	2.64165
TRINITY_DN134261_c1_g2_i3	---NA---	girdin-like	2.63983
TRINITY_DN130971_c0_g3_i2	K16307	serine threonine- kinase MRCK alpha-like	2.63859
TRINITY_DN132482_c0_g8_i1	---NA---	dynein heavy chain axonemal-like	2.63735
TRINITY_DN132260_c0_g1_i4	---NA---	leucine-rich repeats and immunoglobulin-like domains 2	2.63671
TRINITY_DN129241_c0_g1_i1	---NA---	heterogeneous nuclear ribonucleo A1-like	2.63444
TRINITY_DN134385_c0_g1_i6	K00923	phosphatidylinositol 4-phosphate 3-kinase C2 domain-containing subunit alpha-like	2.63291
TRINITY_DN96511_c1_g1_i1	K04450	cyclic AMP-dependent transcription factor ATF-2-like	2.63227
TRINITY_DN136168_c1_g3_i4	---NA---	PREDICTED: uncharacterized protein LOC106097639	2.6301
TRINITY_DN86209_c0_g2_i1	K01049	acetylcholinesterase-like	2.62421
TRINITY_DN135826_c1_g5_i2	---NA---	piggyBac transposable element-derived 4-like	2.62361
TRINITY_DN128593_c2_g5_i1	K18440	arf-GAP with Rho-GAP ANK repeat and PH domain-containing 1-like	2.62336
TRINITY_DN131594_c1_g1_i5	---NA---	pleckstrin homology domain-containing family D member 1-like	2.62336
TRINITY_DN136029_c0_g5_i3	---NA---	multiple epidermal growth factor-like domains 6	2.61927
TRINITY_DN64751_c0_g1_i1	---NA---	AChain Crystal Structures Of Cupin Superfamily Bbduf985 From Branch Belcheri Tsingtauense In The Apo And Gdp-Bound Forms	2.61786
TRINITY_DN119129_c0_g2_i1	---NA---	membrane FAM174-like	2.61741
TRINITY_DN109220_c0_g1_i1	K04373	ribosomal S6 kinase 2 beta-like	2.61623
TRINITY_DN66340_c0_g1_i1	K18763	la-related 4-like	2.61583
TRINITY_DN133550_c0_g1_i1	---NA---	zinc finger 850	2.61559
TRINITY_DN88008_c0_g1_i2	K00942	guanylate kinase-like	2.61552
TRINITY_DN85729_c0_g1_i3	---NA---	hypothetical protein RirG_082610	2.61253
TRINITY_DN117916_c0_g1_i1	---NA---	adhesin Ata autotransporter- partial	2.6123
TRINITY_DN110131_c0_g2_i1	---NA---	cyanophycin synthetase	2.6123
TRINITY_DN44466_c0_g1_i1	---NA---	D-alanyl-D-alanine carboxypeptidase	2.6123
TRINITY_DN11964_c0_g1_i1	---NA---	hypothetical protein AOL_s00076g330	2.6123
TRINITY_DN14598_c0_g1_i1	---NA---	hypothetical protein LOTGIDRAFT_176268	2.6123
TRINITY_DN132449_c4_g13_i1	K01183	probable chitinase 3	2.61209
TRINITY_DN132114_c0_g1_i2	---NA---	GRAM domain-containing 1B-like	2.61042
TRINITY_DN135545_c1_g2_i2	K15009	SH3 and multiple ankyrin repeat domains 1-like	2.60991
TRINITY_DN134397_c4_g4_i1	---NA---	PREDICTED: uncharacterized protein LOC106814216	2.60968
TRINITY_DN122426_c0_g1_i1	---NA---	macoilin-1-like	2.60873
TRINITY_DN130121_c0_g1_i2	---NA---	PREDICTED: uncharacterized protein LOC106175328	2.60847
TRINITY_DN133816_c1_g1_i3	---NA---	adenylate cyclase type 2-like	2.60845
TRINITY_DN130459_c12_g1_i2	K13807	serine threonine- phosphatase with EF-hands 2-like	2.60211
TRINITY_DN97506_c0_g1_i1	---NA---	solute carrier family 15 member 4-like	2.60193
TRINITY_DN129396_c0_g3_i1	---NA---	calponin homology domain-containing DDB_G0272472-like	2.60143
TRINITY_DN136216_c0_g1_i1	K17592	PREDICTED: sacsin-like	2.59892
TRINITY_DN136058_c0_g1_i1	---NA---	Pro-Pol poly	2.59711
TRINITY_DN129316_c0_g1_i5	K13578	bone morphogenetic receptor type-1B-like	2.59448
TRINITY_DN68680_c0_g1_i1	---NA---	PREDICTED: uncharacterized protein LOC105327309	2.59414
TRINITY_DN190125_c0_g1_i1	---NA---	disintegrin and metallo ase domain-containing 10- partial	2.59399
TRINITY_DN65278_c1_g1_i1	---NA---	serine-rich adhesin for platelets-like	2.59351
TRINITY_DN101833_c0_g1_i1	---NA---	von Willebrand factor type EGF and pentraxin domain-containing 1	2.59259
TRINITY_DN134676_c1_g2_i2	---NA---	protocadherin Fat 2	2.59203
TRINITY_DN136236_c0_g1_i1	---NA---	PREDICTED: uncharacterized protein LOC105326379	2.59051
TRINITY_DN87690_c0_g1_i2	K08678	UDP-glucuronic acid decarboxylase 1-like	2.59026
TRINITY_DN128640_c1_g3_i2	---NA---	serine arginine repetitive matrix 1-like	2.58912
TRINITY_DN122149_c0_g2_i2	---NA---	26S proteasome non-ATPase regulatory subunit 10	2.58779
TRINITY_DN133878_c1_g2_i2	---NA---	hypothetical protein CGI_10011657	2.58764
TRINITY_DN132923_c0_g1_i1	---NA---	piggyBac transposable element-derived 4-like	2.58748
TRINITY_DN135229_c4_g2_i1	---NA---	PREDICTED: uncharacterized protein LOC101860769	2.58733
TRINITY_DN135404_c1_g2_i2	---NA---	PREDICTED: uncharacterized protein LOC105317204	2.58633
TRINITY_DN84295_c0_g1_i1	---NA---	Superoxide dismutase [Cu-Zn]	2.58502
TRINITY_DN135187_c0_g1_i1	---NA---	PREDICTED: uncharacterized protein LOC100891119	2.58498
TRINITY_DN127119_c2_g2_i5	---NA---	RNA-binding single-stranded-interacting 3-like	2.58495
TRINITY_DN114107_c1_g1_i2	K09216	zinc finger 181-like	2.58439
TRINITY_DN129339_c3_g1_i1	---NA---	Kielin chordin	2.58162
TRINITY_DN136119_c1_g5_i1	---NA---	PREDICTED: uncharacterized protein LOC106152279	2.58133
TRINITY_DN134435_c0_g4_i1	---NA---	neural-cadherin 2	2.57941
TRINITY_DN136215_c3_g14_i3	---NA---	probable serine threonine- kinase pats1	2.57853
TRINITY_DN130339_c2_g4_i1	---NA---	ankyrin repeat and sterile alpha motif domain-containing 1B- partial	2.57599
TRINITY_DN133913_c15_g1_i1	---NA---	PREDICTED: uncharacterized protein LOC106012228	2.57529
TRINITY_DN118492_c0_g1_i1	---NA---	zinc transporter 2-like	2.57448
TRINITY_DN125123_c1_g1_i3	K15144	mediator of RNA polymerase II transcription subunit 1-like	2.57264
TRINITY_DN97728_c0_g1_i1	---NA---	PREDICTED: zonadhesin-like	2.57231
TRINITY_DN129062_c0_g3_i1	K08630	A disintegrin and metallo ase with thrombospondin motifs 18-like	2.57039
TRINITY_DN130183_c0_g2_i1	K09604	Endoplasmic reticulum aminopeptidase 1	2.56776
TRINITY_DN129374_c0_g1_i2	---NA---	vegetative cell wall gp1- partial	2.56766
TRINITY_DN28589_c0_g1_i1	K08853	BMP-2-inducible kinase-like	2.56542
TRINITY_DN65813_c0_g1_i1	K10343	gustavus-like	2.56542
TRINITY_DN57674_c0_g1_i1	---NA---	piggyBac transposable element-derived 4-like	2.56542
TRINITY_DN134007_c6_g1_i3	K15293	unc-13 homolog B-like	2.56421
TRINITY_DN80915_c0_g1_i1	---NA---	microtubule-associated futsch-like	2.56142
TRINITY_DN90728_c1_g1_i1	K13220	WW domain-binding 4-like	2.56142
TRINITY_DN134430_c3_g9_i3	K12331	rho guanine nucleotide exchange factor 11-like	2.56119
TRINITY_DN128820_c0_g1_i2	K05694	tyrosine- phosphatase 10D-like	2.56072
TRINITY_DN134923_c10_g3_i1	---NA---	PREDICTED: uncharacterized protein LOC105343952	2.55754
TRINITY_DN88444_c0_g1_i2	---NA---	lysosomal amino acid transporter 1 homolog	2.55742
TRINITY_DN115619_c0_g2_i1	---NA---	XK-related 4	2.55742
TRINITY_DN122356_c1_g1_i1	K00461	allene oxide synthase-lipoxygenase -like	2.55605
TRINITY_DN125313_c3_g1_i3	---NA---	70 kDa neurofilament -like	2.55506
TRINITY_DN132241_c1_g1_i4	---NA---	microtubule-associated futsch-like	2.55493
TRINITY_DN11715_c0_g1_i1	K01754	threo-3-hydroxyaspartate ammonia-lyase-like	2.55473
TRINITY_DN134670_c1_g1_i1	---NA---	PREDICTED: uncharacterized protein LOC106162148	2.5547
TRINITY_DN46212_c0_g1_i1	K16308	citron Rho-interacting kinase-like	2.55436
TRINITY_DN75668_c0_g1_i1	---NA---	D(4) dopamine receptor- partial	2.55436
TRINITY_DN6026_c0_g1_i1	K10264	F-box WD repeat-containing 8	2.55436
TRINITY_DN52063_c0_g1_i1	---NA---	G2 M phase-specific E3 ubiquitin- ligase- partial	2.55436
TRINITY_DN94769_c0_g2_i1	---NA---	GTP-binding GEM-like	2.55436
TRINITY_DN64301_c0_g2_i1	---NA---	hypothetical protein	2.55436
TRINITY_DN85870_c0_g1_i2	---NA---	keratin-associated 4-3-like	2.55436
TRINITY_DN118218_c0_g1_i1	---NA---	Predicted protein	2.55436
TRINITY_DN92845_c0_g1_i1	---NA---	PREDICTED: uncharacterized protein LOC105326379	2.55436
TRINITY_DN135140_c0_g5_i1	K06238	Transposon Ty3-I Gag-Pol poly	2.55305
TRINITY_DN99033_c0_g1_i1	---NA---	heparan sulfate glucosamine 3-O-sulfotransferase 3B1-like	2.55053
TRINITY_DN135706_c0_g2_i1	---NA---	PREDICTED: uncharacterized protein K02A2.6-like, partial	2.54885
TRINITY_DN135180_c1_g1_i3	---NA---	hypothetical protein	2.5476
TRINITY_DN134435_c0_g3_i1	---NA---	neural-cadherin 2	2.54748
TRINITY_DN102827_c1_g1_i2	---NA---	tyrosine- phosphatase 99A-like	2.54626
TRINITY_DN111322_c3_g1_i1	---NA---	PREDICTED: uncharacterized protein LOC105321505	2.54394
TRINITY_DN131295_c0_g2_i3	---NA---	A disintegrin and metallo ase with thrombospondin motifs 1	2.54185
TRINITY_DN134672_c0_g1_i2	K14209	proton-coupled amino acid transporter 2-like	2.54084
TRINITY_DN112916_c1_g1_i1	---NA---	large neutral amino acids transporter small subunit 1-like	2.53943
TRINITY_DN132703_c2_g2_i2	K07521	netrin receptor UNC5C-like	2.53721
TRINITY_DN136047_c0_g4_i1	---NA---	PREDICTED: uncharacterized protein LOC106173134	2.53651
TRINITY_DN117035_c0_g1_i1	---NA---	hypothetical protein CGI_10005119	2.53638
TRINITY_DN122389_c0_g2_i1	---NA---	tumor necrosis factor receptor superfamily member 16-like	2.53627
TRINITY_DN64922_c0_g1_i1	---NA---	PREDICTED: uncharacterized protein LOC589552	2.53613
TRINITY_DN107752_c0_g3_i1	K19993	PREDICTED: pleckstrin-like	2.53463
TRINITY_DN135430_c1_g1_i1	---NA---	PREDICTED: uncharacterized protein LOC106180531	2.53309
TRINITY_DN91601_c0_g1_i2	---NA---	predicted protein	2.53189
TRINITY_DN125874_c0_g1_i1	K01792	glucose-6-phosphate 1-epimerase-like	2.5313
TRINITY_DN28589_c0_g2_i1	K08853	BMP-2-inducible kinase-like	2.52861
TRINITY_DN117426_c1_g1_i4	---NA---	PREDICTED: uncharacterized protein LOC105348422	2.52688
TRINITY_DN131345_c0_g1_i4	K00901	diacylglycerol kinase zeta-like	2.52546
TRINITY_DN105769_c0_g1_i1	---NA---	hypothetical protein X975_19061, partial	2.52529
TRINITY_DN133262_c0_g1_i2	K05701	tight junction ZO-1-like	2.52432
TRINITY_DN125437_c0_g1_i1	K17548	PREDICTED: uncharacterized protein LOC105338496	2.52361
TRINITY_DN112411_c0_g1_i1	K03569	rod shape-determining	2.51807
TRINITY_DN134245_c0_g4_i1	---NA---	histone-lysine N-methyltransferase ASH1L-like	2.5142
TRINITY_DN134836_c6_g1_i1	---NA---	mitochondrial amidoxime-reducing component 1-like	2.51371
TRINITY_DN113382_c0_g1_i2	---NA---	dopamine receptor 2-like	2.5133
TRINITY_DN133890_c1_g4_i1	---NA---	SZT2-like	2.51306
TRINITY_DN129456_c0_g1_i1	---NA---	CD151 antigen-like	2.51194
TRINITY_DN132596_c8_g1_i1	---NA---	Pogo transposable element with partial	2.50871
TRINITY_DN129949_c0_g2_i3	---NA---	ankyrin repeat domain-containing 50-like	2.50781
TRINITY_DN136228_c7_g2_i2	---NA---	PREDICTED: uncharacterized protein LOC106817940	2.50769
TRINITY_DN115351_c1_g1_i1	---NA---	serine-rich adhesin for platelets-like	2.5076
TRINITY_DN126983_c5_g1_i1	K01082	3 (2 ),5 -bisphosphate nucleotidase 1-like	2.50584
TRINITY_DN131939_c0_g1_i1	K14708	sodium-independent sulfate anion transporter-like	2.50498
TRINITY_DN130382_c0_g1_i2	K04512	disheveled-associated activator of morphogenesis 1-like	2.5042
TRINITY_DN189304_c0_g1_i1	---NA---	transmembrane 145-like	2.50397
TRINITY_DN135130_c1_g4_i1	---NA---	amine oxidase [copper-containing]	2.50263
TRINITY_DN113311_c0_g1_i1	K19636	hepatocyte growth factor receptor-like	2.50223
TRINITY_DN136158_c0_g2_i1	---NA---	Tripartite motif-containing 2	2.50092
TRINITY_DN124183_c0_g2_i1	---NA---	leucine-rich repeat-containing 74B-like	2.50065
TRINITY_DN136154_c0_g3_i3	---NA---	transcription intermediary factor 1-beta	2.49806
TRINITY_DN208065_c0_g1_i1	---NA---	C4b-binding beta chain	2.49402
TRINITY_DN93776_c1_g1_i1	---NA---	DNA helicase	2.49402
TRINITY_DN106704_c0_g2_i1	---NA---	Inhibitor of nuclear factor kappa-B kinase subunit epsilon	2.49402
TRINITY_DN14724_c0_g1_i1	---NA---	lin-12-like	2.49402
TRINITY_DN132356_c5_g3_i1	---NA---	low-density lipo receptor-related 12	2.49397
TRINITY_DN121533_c0_g2_i1	---NA---	PREDICTED: uncharacterized protein LOC105322056	2.49255
TRINITY_DN134154_c8_g6_i1	K10382	microtubule-actin cross-linking factor	2.49142
TRINITY_DN135951_c2_g13_i5	---NA---	PREDICTED: uncharacterized protein LOC105336703	2.49113
TRINITY_DN132243_c1_g2_i2	K10798	poly [ADP-ribose] polymerase 4-like	2.49086
TRINITY_DN131446_c0_g1_i1	K12231	E3 ubiquitin- ligase HECTD1-like	2.49035
TRINITY_DN127838_c0_g2_i1	K08115	chondroitin sulfate proteoglycan 4-like	2.48954
TRINITY_DN134589_c0_g1_i4	---NA---	zinc finger BED domain-containing 1-like	2.48874
TRINITY_DN133980_c0_g2_i1	K16669	cadherin-related tumor suppressor-like	2.48473
TRINITY_DN134380_c0_g1_i2	K02350	DNA polymerase zeta catalytic subunit	2.48348
TRINITY_DN133178_c3_g1_i6	K08518	Syntaxin-binding 5	2.48308
TRINITY_DN132805_c2_g1_i4	---NA---	cadherin EGF LAG seven-pass G-type receptor 1-like	2.47732
TRINITY_DN136246_c2_g2_i1	---NA---	E3 ubiquitin- ligase RNF213-like	2.47457
TRINITY_DN129509_c0_g1_i1	K12654	stimulator of interferon 1	2.47446
TRINITY_DN130651_c0_g2_i3	K08008	cytochrome b-245 heavy chain-like	2.47342
TRINITY_DN79895_c0_g1_i1	---NA---	sodium- and chloride-dependent glycine transporter 1-like	2.4734
TRINITY_DN106480_c1_g1_i1	---NA---	ATP-binding cassette sub-family G member 1	2.47239
TRINITY_DN136247_c3_g1_i2	---NA---	predicted protein	2.47236
TRINITY_DN135030_c1_g2_i1	---NA---	Retrovirus-related Pol poly from transposon partial	2.47215
TRINITY_DN118683_c0_g1_i1	---NA---	dTDP-glucose 4,6- partial	2.46836
TRINITY_DN475_c0_g1_i1	K01476	arginase type I	2.46772
TRINITY_DN100030_c0_g1_i1	---NA---	sterile alpha motif domain-containing 5-like	2.46772
TRINITY_DN136244_c6_g6_i1	---NA---	cysteine protease ATG4D	2.46691
TRINITY_DN134126_c0_g9_i1	---NA---	PREDICTED: protein dachsous-like	2.46554
TRINITY_DN125379_c0_g1_i2	K00922	phosphatidylinositol 4,5-bisphosphate 3-kinase catalytic subunit alpha	2.46371
TRINITY_DN79634_c0_g1_i1	---NA---	PREDICTED: uncharacterized protein LOC105328820	2.46358
TRINITY_DN135282_c0_g4_i1	---NA---	PREDICTED: uncharacterized protein LOC105346378	2.46358
TRINITY_DN134522_c13_g1_i1	---NA---	piggyBac transposable element-derived 4-like	2.46137
TRINITY_DN133375_c1_g2_i2	---NA---	PREDICTED: uncharacterized protein LOC105332214	2.46123
TRINITY_DN13506_c0_g2_i1	---NA---	phospholipid scramblase 1-like	2.46074
TRINITY_DN129433_c0_g1_i2	---NA---	PREDICTED: uncharacterized protein LOC106869812	2.45764
TRINITY_DN134418_c9_g1_i1	K00654	serine palmitoyltransferase 2-like	2.45719
TRINITY_DN136079_c0_g2_i1	---NA---	PREDICTED: uncharacterized protein LOC105323877	2.45623
TRINITY_DN132530_c1_g2_i4	---NA---	xanthine dehydrogenase oxidase-like	2.45603
TRINITY_DN133742_c0_g3_i1	---NA---	Wings apart	2.45588
TRINITY_DN136084_c1_g1_i2	---NA---	PREDICTED: uncharacterized protein LOC105346803	2.45498
TRINITY_DN20282_c0_g1_i1	K01940	argininosuccinate synthase-like	2.45453
TRINITY_DN123334_c0_g1_i1	K09448	transcriptional enhancer factor TEF-1-like	2.45391
TRINITY_DN127821_c1_g1_i1	---NA---	CDV3 homolog	2.45168
TRINITY_DN133658_c2_g1_i1	---NA---	D-octopine partial	2.4493
TRINITY_DN118920_c0_g1_i1	K06759	PREDICTED: contactin-like	2.44922
TRINITY_DN133523_c1_g1_i1	---NA---	beta-hexosaminidase subunit beta-like	2.44849
TRINITY_DN126340_c1_g1_i3	K17601	WD repeat-containing 81-like	2.44817
TRINITY_DN88645_c0_g2_i1	---NA---	PREDICTED: uncharacterized protein LOC105344237	2.44618
TRINITY_DN131299_c0_g1_i1	---NA---	hypothetical protein LOTGIDRAFT_155085	2.4458
TRINITY_DN133282_c0_g1_i1	---NA---	variable lymphocyte receptor C	2.44431
TRINITY_DN127174_c0_g3_i2	K16316	serine threonine- kinase 31-like	2.44334
TRINITY_DN125555_c0_g1_i1	K04422	mitogen-activated kinase kinase kinase 13-like	2.44294
TRINITY_DN119986_c0_g1_i1	---NA---	RIKEN cDNA A530054K11 gene	2.4427
TRINITY_DN115351_c2_g1_i1	---NA---	E3 ubiquitin- ligase TRIM56-like	2.43995
TRINITY_DN135353_c0_g4_i8	K05641	ATP-binding cassette sub-family A member 1-like	2.43835
TRINITY_DN79727_c0_g1_i2	---NA---	FYN-binding partial	2.43547
TRINITY_DN133648_c0_g1_i1	K12168	E3 ubiquitin- ligase HECW2-like	2.43342
TRINITY_DN105265_c0_g1_i1	---NA---	Ankyrin repeat and SOCS box	2.43282
TRINITY_DN133560_c4_g4_i3	---NA---	MAM and LDL-receptor class A domain-containing 1-like	2.4325
TRINITY_DN171724_c0_g1_i1	---NA---	tripartite motif-containing 2-like	2.43176
TRINITY_DN46519_c0_g1_i1	---NA---	inositol 1,4,5-trisphosphate receptor type 3-like	2.43104
TRINITY_DN32817_c0_g1_i1	---NA---	MAM and LDL-receptor class A domain-containing 2-like	2.43104
TRINITY_DN128329_c0_g3_i1	K00472	prolyl 4-hydroxylase subunit alpha-1-like	2.43104
TRINITY_DN90120_c0_g2_i1	---NA---	trifunctional enzyme subunit mitochondrial-like	2.43104
TRINITY_DN119092_c0_g2_i1	K01530	probable phospholipid-transporting ATPase IIB	2.43103
TRINITY_DN131885_c0_g1_i2	---NA---	soluble guanylate cyclase 88E-like	2.43036
TRINITY_DN131269_c1_g1_i2	---NA---	17-beta-hydroxysteroid dehydrogenase 14-like	2.43015
TRINITY_DN136215_c3_g9_i1	---NA---	hypothetical protein LOTGIDRAFT_228817	2.42951
TRINITY_DN136054_c2_g7_i1	---NA---	zinc finger 862-like	2.42769
TRINITY_DN126368_c0_g1_i2	---NA---	tyrosine phosphatase	2.4273
TRINITY_DN122496_c0_g1_i2	---NA---	PHD finger 12-like	2.42694
TRINITY_DN59838_c0_g1_i1	K13758	retinal rod rhodopsin-sensitive cGMP 3 ,5 -cyclic phosphodiesterase subunit delta-like	2.42499
TRINITY_DN51488_c0_g1_i1	---NA---	hypothetical protein LOTGIDRAFT_165435	2.42414
TRINITY_DN102052_c0_g1_i1	---NA---	abhydrolase domain-containing 16A-like	2.42402
TRINITY_DN118784_c0_g2_i3	K14686	high affinity copper uptake 1-like	2.42289
TRINITY_DN99438_c0_g1_i2	---NA---	PREDICTED: uncharacterized protein LOC105326090	2.42276
TRINITY_DN132299_c1_g2_i2	---NA---	receptor-type guanylate cyclase gcy-2-like	2.42011
TRINITY_DN134529_c1_g3_i5	---NA---	polybromo-1-like	2.41952
TRINITY_DN134291_c1_g2_i11	---NA---	MAP kinase-activating death domain	2.41829
TRINITY_DN208413_c0_g1_i1	---NA---	trichohyalin-like	2.41723
TRINITY_DN92055_c0_g1_i1	---NA---	sigma glutathione S-transferase 3	2.41701
TRINITY_DN134179_c0_g6_i1	---NA---	probable phospholipid-transporting ATPase IF	2.41608
TRINITY_DN134717_c1_g1_i3	---NA---	myosin-2 heavy chain-like	2.41525
TRINITY_DN131956_c0_g3_i2	K03163	DNA topoisomerase mitochondrial-like	2.41461
TRINITY_DN134637_c4_g4_i1	---NA---	multiple epidermal growth factor-like domains 8	2.41446
TRINITY_DN133569_c0_g1_i1	---NA---	glucose dehydrogenase [ quinone]-like	2.41401
TRINITY_DN136187_c1_g1_i2	---NA---	Retrovirus-related Pol poly from transposon 412	2.41357
TRINITY_DN127230_c0_g1_i4	---NA---	endothelin-converting enzyme 1-like	2.41281
TRINITY_DN130227_c0_g1_i4	K20476	RAB6A-GEF complex partner 1-like	2.41219
TRINITY_DN130828_c0_g1_i3	K05038	sodium- and chloride-dependent neutral and basic amino acid transporter B(0+)-like	2.41063
TRINITY_DN134285_c1_g2_i1	K04494	chromodomain-helicase-DNA-binding 8-like	2.4106
TRINITY_DN109337_c0_g3_i1	---NA---	Aryl hydrocarbon receptor nuclear translocator	2.40969
TRINITY_DN101122_c0_g1_i1	---NA---	zinc finger rotund-like	2.40969
TRINITY_DN101300_c0_g1_i1	K18405	RING finger 17-like	2.40951
TRINITY_DN135830_c3_g2_i2	---NA---	PREDICTED: uncharacterized protein LOC583642	2.40934
TRINITY_DN133244_c1_g4_i1	K14772	small subunit processome component 20 homolog	2.40879
TRINITY_DN99901_c0_g1_i1	K18488	homeobox Dlx6a-like	2.40749
TRINITY_DN134050_c0_g1_i1	K09378	zinc finger homeobox 4-like	2.40729
TRINITY_DN131861_c0_g1_i1	---NA---	hypothetical protein CGI_10027658	2.40632
TRINITY_DN111545_c0_g2_i1	---NA---	sodium- and chloride-dependent glycine transporter 2-like	2.40592
TRINITY_DN101122_c0_g3_i2	---NA---	zinc finger 83-like	2.4032
TRINITY_DN134262_c0_g5_i10	K16578	CLIP-associating 1-like	2.40213
TRINITY_DN10458_c0_g2_i1	K15379	solute carrier family 45 member 3-like	2.40144
TRINITY_DN122438_c0_g1_i7	K03097	casein kinase II subunit alpha	2.40047
TRINITY_DN131436_c1_g1_i1	---NA---	glutamic acid-rich - partial	2.40028
TRINITY_DN128483_c1_g1_i1	---NA---	unconventional myosin-XIX	2.39894
TRINITY_DN112582_c0_g1_i1	---NA---	trichohyalin-like	2.39683
TRINITY_DN129766_c0_g1_i2	K11420	PREDICTED: LOW QUALITY PROTEIN: uncharacterized protein LOC106058626	2.39673
TRINITY_DN134039_c7_g6_i1	---NA---	PREDICTED: uncharacterized protein LOC105332024	2.39652
TRINITY_DN136218_c1_g1_i1	K17592	sacsin- partial	2.3965
TRINITY_DN101854_c0_g1_i1	---NA---	zinc finger 888	2.39608
TRINITY_DN134854_c2_g2_i1	---NA---	pol-like protein	2.39565
TRINITY_DN130322_c0_g1_i1	---NA---	poly [ADP-ribose] polymerase 14-like	2.39559
TRINITY_DN117931_c0_g1_i1	---NA---	WD repeat-containing on Y chromosome-like	2.39274
TRINITY_DN136235_c2_g1_i1	K17592	sacsin	2.39153
TRINITY_DN131750_c1_g3_i2	K19026	spatacsin-like	2.38908
TRINITY_DN128809_c1_g3_i1	---NA---	ubiquitin carboxyl-terminal hydrolase 25-like	2.38733
TRINITY_DN135184_c4_g1_i6	---NA---	PREDICTED: uncharacterized protein LOC105438389	2.38667
TRINITY_DN134901_c4_g1_i1	---NA---	NS1, partial	2.38593
TRINITY_DN130043_c2_g3_i1	---NA---	serine threonine- kinase TAO1-like	2.38212
TRINITY_DN128820_c0_g2_i1	---NA---	tyrosine- phosphatase 10D-like	2.38138
TRINITY_DN133573_c0_g3_i1	K16172	insulin receptor substrate partial	2.38124
TRINITY_DN135151_c0_g1_i1	---NA---	TPA_exp: gag	2.38101
TRINITY_DN129458_c0_g2_i1	---NA---	Keratin-associated 4- partial	2.3801
TRINITY_DN81851_c1_g1_i1	K19403	microcephalin-like	2.3801
TRINITY_DN116563_c0_g1_i1	---NA---	emopamil-binding -like	2.37921
TRINITY_DN135758_c0_g1_i4	---NA---	pogo transposable element with KRAB domain	2.37879
TRINITY_DN113098_c0_g2_i1	K05662	ATP-binding cassette sub-family B member mitochondrial-like	2.37793
TRINITY_DN111920_c1_g1_i1	K10588	ubiquitin- ligase E3B-like	2.37729
TRINITY_DN121582_c0_g1_i1	K12615	enhancer of mRNA-decapping 3-like	2.37706
TRINITY_DN136157_c1_g4_i1	---NA---	PREDICTED: uncharacterized protein LOC105324423	2.37675
TRINITY_DN129803_c1_g1_i1	---NA---	cGMP-inhibited 3 ,5 -cyclic phosphodiesterase A	2.37568
TRINITY_DN154719_c0_g1_i1	---NA---	methylcrotonoyl- carboxylase beta mitochondrial-like	2.37554
TRINITY_DN134207_c0_g1_i1	K11718	UDP-glucose:glyco glucosyltransferase 1-like	2.37306
TRINITY_DN130862_c0_g4_i2	---NA---	mucin-17-like	2.37212
TRINITY_DN120444_c0_g1_i2	K08898	tyrosine- kinase abl-1-like	2.37189
TRINITY_DN122574_c1_g5_i1	---NA---	tyrosine- kinase HTK16-like	2.37089
TRINITY_DN135973_c0_g2_i2	---NA---	PREDICTED: uncharacterized protein LOC105892176	2.37071
TRINITY_DN122325_c0_g3_i1	---NA---	PREDICTED: uncharacterized protein LOC105335500	2.36833
TRINITY_DN130384_c0_g2_i1	---NA---	thyroid adenoma-associated homolog	2.36812
TRINITY_DN132525_c0_g1_i3	K16353	sidekick-2-like	2.36785
TRINITY_DN133392_c0_g1_i3	---NA---	methylcytosine dioxygenase TET1-like	2.36757
TRINITY_DN104906_c0_g1_i2	K11997	tripartite motif-containing 2-like	2.36656
TRINITY_DN118933_c1_g1_i1	K17987	next to BRCA1 gene 1 -like	2.36616
TRINITY_DN132435_c1_g3_i1	K09536	dnaJ homolog subfamily C member 16-like	2.36551
TRINITY_DN136119_c0_g1_i1	---NA---	PREDICTED: uncharacterized protein LOC106170666	2.36551
TRINITY_DN43941_c0_g1_i1	---NA---	PREDICTED: uncharacterized protein LOC105343080	2.36529
TRINITY_DN118920_c0_g3_i1	---NA---	contactin- partial	2.36523
TRINITY_DN142025_c0_g1_i1	---NA---	fibropellin- partial	2.36523
TRINITY_DN123106_c0_g2_i1	---NA---	GDAP2 homolog	2.36523
TRINITY_DN210224_c0_g1_i1	---NA---	hypothetical protein LOTGIDRAFT_154256	2.36523
TRINITY_DN135506_c3_g5_i1	---NA---	palmitoyltransferase ZDHHC21-like	2.36523
TRINITY_DN173239_c0_g1_i1	---NA---	PREDICTED: uncharacterized protein LOC105330107	2.36523
TRINITY_DN115928_c0_g1_i1	---NA---	serine-rich adhesin for platelets-like	2.36523
TRINITY_DN76158_c0_g2_i1	---NA---	tankyrase-2-like	2.36523
TRINITY_DN173306_c0_g1_i1	K03671	THIO_ICTPU ame: Full=Thioredoxin Short=Trx	2.36523
TRINITY_DN98047_c0_g1_i1	---NA---	von Willebrand factor type EGF and pentraxin domain-containing 1-like	2.36523
TRINITY_DN133009_c0_g3_i1	---NA---	zinc finger 596-like	2.36523
TRINITY_DN131379_c2_g1_i2	K20633	rho GTPase-activating 8-like	2.36479
TRINITY_DN98483_c1_g1_i1	---NA---	hypothetical protein LOTGIDRAFT_154105	2.36432
TRINITY_DN130780_c0_g3_i1	---NA---	ankyrin-2-like	2.36416
TRINITY_DN133555_c0_g1_i5	K04491	transcription factor 7-like 2	2.36262
TRINITY_DN95291_c0_g1_i1	K15693	RING finger 26	2.35872
TRINITY_DN133350_c0_g1_i2	---NA---	zinc finger 862-like	2.35872
TRINITY_DN118968_c0_g2_i1	K14970	AF395538_1multiple endocrine neoplasia type 1	2.35727
TRINITY_DN132350_c3_g1_i1	K19948	MICAL 2	2.35657
TRINITY_DN172949_c0_g1_i1	---NA---	PREDICTED: uncharacterized protein C17orf98-like	2.35645
TRINITY_DN133632_c0_g2_i4	---NA---	PREDICTED: uncharacterized protein LOC105347980	2.35639
TRINITY_DN136095_c4_g3_i6	---NA---	B-cell receptor CD22-like	2.35317
TRINITY_DN133280_c6_g5_i1	---NA---	hypothetical protein BRAFLDRAFT_77273	2.35217
TRINITY_DN132913_c0_g1_i3	K09113	MLX-interacting -like	2.35045
TRINITY_DN127519_c0_g1_i1	K01231	alpha-mannosidase 2x-like	2.35027
TRINITY_DN133624_c1_g3_i4	K13708	dedicator of cytokinesis 1-like	2.34945
TRINITY_DN127321_c3_g1_i4	K13858	Na-dependent Cl HCO3 exchanger	2.34944
TRINITY_DN117674_c0_g3_i1	K20133	USP6 N-terminal	2.34938
TRINITY_DN50050_c0_g1_i1	K19370	dnaJ homolog subfamily C member 22-like	2.34895
TRINITY_DN86337_c0_g1_i1	---NA---	glutamate receptor subunit 2 precursor	2.34678
TRINITY_DN136233_c0_g3_i1	---NA---	hypothetical protein BRAFLDRAFT_98594	2.34674
TRINITY_DN74465_c0_g1_i1	---NA---	hypothetical protein LOTGIDRAFT_157121	2.34669
TRINITY_DN120133_c0_g1_i1	---NA---	predicted protein	2.34669
TRINITY_DN134225_c0_g1_i1	---NA---	Alstrom syndrome 1	2.34512
TRINITY_DN130513_c1_g2_i3	---NA---	zinc finger squeeze-like	2.34511
TRINITY_DN135959_c0_g1_i2	---NA---	probable DNA polymerase	2.34459
TRINITY_DN133914_c0_g3_i1	---NA---	hypothetical protein JH06_3373	2.34182
TRINITY_DN131720_c0_g2_i1	K18442	brefeldin A-inhibited guanine nucleotide-exchange 1-like	2.34161
TRINITY_DN134081_c1_g2_i4	K04533	PREDICTED: huntingtin-like	2.34066
TRINITY_DN134164_c0_g1_i1	K04598	latrophilin and seven transmembrane domain-containing 1-like	2.34054
TRINITY_DN123230_c1_g2_i1	---NA---	zinc finger 239-like	2.34049
TRINITY_DN99141_c0_g1_i1	K10457	kelch 20	2.33747
TRINITY_DN127239_c0_g1_i1	---NA---	PREDICTED: girdin-like	2.33577
TRINITY_DN133564_c0_g8_i1	K17834	mab-21-like 3	2.33407
TRINITY_DN135272_c8_g2_i3	---NA---	PREDICTED: uncharacterized protein LOC105440841	2.33393
TRINITY_DN131080_c0_g2_i1	K11584	serine threonine- phosphatase 2A 56 kDa regulatory subunit alpha	2.33389
TRINITY_DN134513_c0_g2_i3	---NA---	hypothetical protein CAPTEDRAFT_208751	2.33343
TRINITY_DN71525_c0_g1_i1	K07914	ras-related Rab-37-like	2.33343
TRINITY_DN134670_c1_g8_i2	K11109	PREDICTED: uncharacterized protein LOC105440841	2.33251
TRINITY_DN134762_c1_g4_i2	K10706	splicing endonuclease positive effector	2.33221
TRINITY_DN125377_c1_g2_i1	---NA---	Tudor domain-containing 5	2.33058
TRINITY_DN129615_c0_g1_i5	K04593	latrophilin-3-like	2.33057
TRINITY_DN93753_c0_g1_i1	---NA---	PREDICTED: uncharacterized protein LOC101856593	2.33049
TRINITY_DN85618_c0_g1_i1	---NA---	PREDICTED: uncharacterized protein LOC106181488	2.33049
TRINITY_DN101191_c0_g1_i3	---NA---	kDa proline-rich -like	2.33043
TRINITY_DN132680_c0_g2_i1	---NA---	PREDICTED: uncharacterized protein LOC106821594	2.33043
TRINITY_DN104561_c1_g1_i1	---NA---	hypothetical protein GLOINDRAFT_88523	2.32798
TRINITY_DN134321_c1_g1_i2	---NA---	von Willebrand factor type EGF and pentraxin domain-containing 1-like	2.32749
TRINITY_DN133737_c1_g1_i1	K15164	mediator of RNA polymerase II transcription subunit 13-like	2.32642
TRINITY_DN134199_c0_g2_i3	---NA---	dynein heavy chain axonemal-like	2.32354
TRINITY_DN135670_c5_g1_i1	K06642	DNA-dependent kinase catalytic subunit-like	2.32319
TRINITY_DN116625_c2_g2_i1	K08872	serine threonine- kinase RIO3-like	2.32305
TRINITY_DN125118_c0_g1_i2	K11852	ubiquitin carboxyl-terminal hydrolase 31-like	2.32258
TRINITY_DN105466_c0_g1_i1	K05613	excitatory amino acid transporter-like	2.32253
TRINITY_DN123773_c0_g2_i1	---NA---	Band 5	2.32094
TRINITY_DN99012_c0_g1_i1	---NA---	brain I3	2.32039
TRINITY_DN134232_c4_g15_i1	---NA---	titin-like	2.31897
TRINITY_DN118328_c1_g3_i1	---NA---	PDZ domain-containing 8-like	2.31808
TRINITY_DN128466_c0_g5_i1	---NA---	dyslexia-associated KIAA0319	2.31772
TRINITY_DN136045_c2_g1_i1	---NA---	Neurogenic locus notch	2.31772
TRINITY_DN103031_c1_g1_i1	---NA---	PREDICTED: uncharacterized protein LOC105347199	2.31739
TRINITY_DN124462_c1_g1_i4	K12489	arf-GAP with coiled- ANK repeat and PH domain-containing 2-like	2.31679
TRINITY_DN133030_c0_g1_i2	K14611	solute carrier family 23 member 1-like	2.31419
TRINITY_DN86539_c0_g1_i1	K04630	GNAI_LYMST ame: Full=Guanine nucleotide-binding G(i) subunit alpha ame: Full=Adenylate cyclase-inhibiting G alpha	2.31285
TRINITY_DN136248_c19_g1_i2	---NA---	RNA-directed DNA polymerase from mobile element partial	2.31159
TRINITY_DN132401_c0_g3_i4	K19027	zinc finger FYVE domain-containing 26-like	2.31158
TRINITY_DN132097_c1_g3_i1	---NA---	potassium voltage-gated channel subfamily H member 6-like	2.31154
TRINITY_DN133993_c0_g2_i2	---NA---	multiple epidermal growth factor-like domains 10	2.31144
TRINITY_DN133235_c9_g1_i1	---NA---	PREDICTED: uncharacterized protein LOC105344292	2.31056
TRINITY_DN136164_c2_g8_i1	---NA---	PREDICTED: uncharacterized protein LOC106175329	2.3098
TRINITY_DN132019_c0_g2_i4	K16727	rho guanine nucleotide exchange factor 10	2.30703
TRINITY_DN136143_c1_g8_i1	---NA---	RNA-directed DNA polymerase from mobile element jockey	2.3053
TRINITY_DN122724_c0_g1_i1	---NA---	piggyBac transposable element-derived 4-like	2.30489
TRINITY_DN107763_c0_g1_i1	---NA---	PREDICTED: uncharacterized protein LOC105345100	2.30457
TRINITY_DN125858_c0_g1_i1	K04393	rho family GTPase Cdc42	2.30457
TRINITY_DN136028_c0_g8_i2	---NA---	zinc finger 862-like	2.30412
TRINITY_DN133890_c1_g2_i1	---NA---	hypothetical protein BRAFLDRAFT_77785	2.30385
TRINITY_DN134549_c3_g2_i1	---NA---	PREDICTED: uncharacterized protein LOC106180531	2.3033
TRINITY_DN133779_c0_g3_i25	K16175	scribble homolog	2.30309
TRINITY_DN129973_c0_g1_i1	---NA---	deleted in malignant brain tumors 1 -like	2.30264
TRINITY_DN133246_c7_g1_i5	K01530	phospholipid-transporting ATPase ID-like	2.30126
TRINITY_DN136227_c0_g3_i2	---NA---	Sacsin	2.3006
TRINITY_DN109347_c0_g1_i1	---NA---	PREDICTED: uncharacterized protein LOC105326200	2.30018
TRINITY_DN118645_c0_g2_i1	---NA---	PREDICTED: uncharacterized protein LOC105338166	2.29846
TRINITY_DN118665_c0_g1_i1	K06619	tyrosine- kinase Abl-like	2.29729
TRINITY_DN133440_c7_g7_i2	---NA---	dentin sialophospho -like	2.2971
TRINITY_DN127313_c0_g1_i1	---NA---	constitutive coactivator of peroxisome proliferator-activated receptor gamma	2.29632
TRINITY_DN12553_c0_g2_i1	---NA---	DCN1 1	2.29632
TRINITY_DN135513_c1_g1_i1	---NA---	dedicator of cytokinesis 9-like	2.29632
TRINITY_DN177604_c0_g1_i1	---NA---	dual specificity tyrosine-phosphorylation-regulated kinase 4-like	2.29632
TRINITY_DN205865_c0_g1_i1	---NA---	hypothetical protein BRAFLDRAFT_92090	2.29632
TRINITY_DN116747_c0_g1_i1	---NA---	hypothetical protein N305_10476, partial	2.29632
TRINITY_DN116750_c0_g1_i1	---NA---	hypothetical protein RF55_25379, partial	2.29632
TRINITY_DN965_c0_g1_i1	---NA---	matrilin-2-like	2.29632
TRINITY_DN19727_c0_g1_i1	---NA---	neuronal acetylcholine receptor subunit alpha-10-like	2.29632
TRINITY_DN75650_c0_g1_i1	---NA---	PREDICTED: uncharacterized protein LOC106611264	2.29632
TRINITY_DN211859_c0_g1_i1	---NA---	PREDICTED: uncharacterized protein LOC106811642	2.29632
TRINITY_DN143917_c0_g1_i1	---NA---	sex peptide receptor-like	2.29632
TRINITY_DN79895_c3_g1_i1	---NA---	sodium- and chloride-dependent glycine transporter 1- partial	2.29632
TRINITY_DN89697_c0_g1_i1	---NA---	transmembrane protease serine 13- partial	2.29632
TRINITY_DN88479_c0_g1_i1	K15113	mitoferrin-2-like	2.29576
TRINITY_DN126159_c0_g1_i1	---NA---	NEDD4-binding 2-like 1	2.29483
TRINITY_DN132333_c1_g1_i2	---NA---	PREDICTED: uncharacterized protein LOC105441677	2.29419
TRINITY_DN132219_c0_g1_i1	---NA---	RNA-directed DNA polymerase from mobile element jockey-like	2.29097
TRINITY_DN133621_c0_g1_i1	K13291	terminal uridylyltransferase 4-like	2.28931
TRINITY_DN123978_c0_g1_i2	---NA---	dentin sialophospho -like	2.28854
TRINITY_DN73232_c0_g1_i1	K10395	chromosome-associated kinesin KIF4-like	2.28828
TRINITY_DN69857_c0_g1_i1	---NA---	transport and Golgi organization 6 homolog	2.28743
TRINITY_DN127180_c0_g4_i5	K01537	calcium-transporting ATPase type 2C member 1-like	2.28516
TRINITY_DN134022_c1_g5_i1	---NA---	hypothetical protein CAPTEDRAFT_213947, partial	2.28346
TRINITY_DN123400_c2_g1_i2	K06491	fasciclin-2-like	2.28308
TRINITY_DN116978_c0_g1_i1	---NA---	fibronectin type 3 and ankyrin repeat domains 1 -like	2.28284
TRINITY_DN80358_c1_g1_i1	K20656	transmembrane 189-like	2.28163
TRINITY_DN131194_c2_g1_i3	---NA---	Vasculin 1	2.28037
TRINITY_DN134126_c0_g1_i1	---NA---	PREDICTED: protein dachsous-like	2.28002
TRINITY_DN134176_c3_g6_i1	K20685	guanine nucleotide exchange factor DBS-like	2.27976
TRINITY_DN116909_c0_g1_i2	---NA---	RNA-directed DNA polymerase from mobile element jockey- partial	2.27956
TRINITY_DN99502_c0_g1_i1	---NA---	PREDICTED: uncharacterized protein LOC105441895	2.27867
TRINITY_DN123320_c0_g1_i1	---NA---	hypothetical protein LOTGIDRAFT_175142	2.27836
TRINITY_DN142682_c0_g1_i1	---NA---	ras-related C3 botulinum toxin substrate 1	2.27836
TRINITY_DN134255_c0_g2_i9	---NA---	PREDICTED: uncharacterized protein LOC105321045	2.27809
TRINITY_DN127158_c3_g2_i1	K04371	mitogen-activated kinase 1-like	2.27733
TRINITY_DN131429_c1_g2_i6	K10728	DNA topoisomerase 2-binding 1	2.27517
TRINITY_DN172847_c0_g2_i1	---NA---	Kyphoscoliosis peptidase	2.27405
TRINITY_DN129958_c0_g1_i4	---NA---	frizzled5 8	2.27366
TRINITY_DN108785_c0_g1_i1	---NA---	carbonic anhydrase 6-like	2.2722
TRINITY_DN124616_c0_g3_i1	K19871	DNA-binding Ikaros-like	2.27176
TRINITY_DN133091_c2_g2_i1	---NA---	lipase maturation factor 2-like	2.27009
TRINITY_DN135636_c1_g2_i2	---NA---	kinase D interacting substrate of 220 kDa	2.26881
TRINITY_DN135832_c0_g1_i2	---NA---	hypothetical protein BRAFLDRAFT_72537	2.26808
TRINITY_DN132602_c0_g3_i1	---NA---	disco-interacting 2-like	2.26804
TRINITY_DN134928_c0_g3_i1	K15183	RNA polymerase II elongation factor ELL-like	2.26723
TRINITY_DN188625_c0_g1_i1	---NA---	tyrosine- kinase SRK2-like	2.26499
TRINITY_DN128148_c0_g1_i1	---NA---	hypothetical protein CGI_10009389	2.2649
TRINITY_DN95581_c2_g1_i1	---NA---	inverted formin-2-like	2.2649
TRINITY_DN124626_c0_g1_i2	K12380	ras GTPase-activating 3- partial	2.2636
TRINITY_DN131497_c0_g1_i1	---NA---	insulin-like growth factor-binding complex acid labile subunit	2.2617
TRINITY_DN127814_c0_g1_i2	---NA---	hypothetical protein LR48_Vigan08g023900	2.26022
TRINITY_DN188304_c0_g1_i1	---NA---	Zinc finger 271	2.26022
TRINITY_DN64758_c0_g1_i1	K06537	CD151 antigen-like	2.25945
TRINITY_DN128171_c0_g1_i1	K15340	DNA cross-link repair 1A -like	2.25945
TRINITY_DN125304_c0_g1_i1	---NA---	cysteine-rich motor neuron 1 -like	2.25886
TRINITY_DN130730_c0_g1_i1	K06267	Hyaluronan mediated motility receptor	2.2582
TRINITY_DN133573_c0_g4_i1	K16172	insulin receptor substrate 1	2.25816
TRINITY_DN128466_c0_g3_i1	---NA---	dyslexia-associated KIAA0319	2.25744
TRINITY_DN112917_c0_g1_i1	K11997	tripartite motif-containing 2-like	2.2567
TRINITY_DN134768_c0_g1_i3	---NA---	heat shock 70 kDa 12A-like	2.25271
TRINITY_DN123116_c0_g2_i1	---NA---	VPS10 domain-containing receptor 1-like	2.25195
TRINITY_DN111980_c1_g1_i1	---NA---	kinesin KIF26A	2.25045
TRINITY_DN126444_c0_g1_i1	K17572	brefeldin A-inhibited guanine nucleotide-exchange 3- partial	2.24855
TRINITY_DN132208_c0_g1_i2	K16804	disks large-associated 5-like	2.2481
TRINITY_DN125973_c1_g1_i1	---NA---	zinc finger draculin-like	2.24806
TRINITY_DN131112_c0_g2_i2	---NA---	Tumor necrosis factor receptor superfamily member 1B	2.24648
TRINITY_DN31789_c0_g2_i1	K14021	bcl-2 homologous antagonist killer-like	2.2435
TRINITY_DN106050_c0_g1_i1	K16524	A-kinase anchor 7	2.2428
TRINITY_DN80444_c0_g1_i1	K16309	serine threonine- kinase greatwall-like	2.24197
TRINITY_DN128949_c0_g2_i1	K03350	cell division cycle 27 homolog	2.24087
TRINITY_DN134413_c0_g1_i1	---NA---	zinc finger 862-like	2.24032
TRINITY_DN129609_c0_g1_i2	---NA---	interphotoreceptor matrix proteoglycan 2- partial	2.23872
TRINITY_DN136058_c0_g2_i1	---NA---	PREDICTED: uncharacterized protein LOC101883482	2.23744
TRINITY_DN136069_c1_g2_i2	---NA---	centrosomal of 192 kDa-like	2.23673
TRINITY_DN51327_c0_g1_i1	---NA---	GPI ethanolamine phosphate transferase 1	2.23658
TRINITY_DN135814_c0_g2_i1	---NA---	RNA-directed DNA polymerase from mobile element jockey-like	2.23548
TRINITY_DN107721_c1_g5_i1	K13189	basic salivary proline-rich 2-like	2.23419
TRINITY_DN135931_c0_g4_i3	---NA---	PREDICTED: uncharacterized protein LOC105438389	2.23408
TRINITY_DN134468_c4_g2_i6	K08834	myosin-IIIb-like	2.23369
TRINITY_DN132256_c0_g3_i12	K16060	baculoviral IAP repeat-containing 7-like	2.23207
TRINITY_DN120004_c0_g1_i5	---NA---	WD repeat domain phosphoinositide-interacting 3-like	2.2314
TRINITY_DN132082_c0_g1_i1	---NA---	transmembrane 45B-like	2.23139
TRINITY_DN130033_c4_g2_i2	K09428	ecdysone-induced 74EF	2.2312
TRINITY_DN134160_c5_g2_i1	---NA---	ATP-binding cassette sub-family A member 3-like	2.23015
TRINITY_DN128848_c0_g1_i3	---NA---	cell surface	2.22736
TRINITY_DN105706_c0_g1_i1	---NA---	cGMP-specific 3 ,5 -cyclic phosphodiesterase-like	2.22678
TRINITY_DN192674_c0_g1_i1	K04615	gamma-aminobutyric acid type B receptor subunit 1-like	2.22678
TRINITY_DN125158_c0_g1_i1	---NA---	PREDICTED: uncharacterized protein LOC106565687	2.22678
TRINITY_DN68469_c1_g1_i1	---NA---	hypothetical protein CAPTEDRAFT_40640, partial	2.22618
TRINITY_DN113448_c0_g2_i1	---NA---	DEP domain-containing 1B-like	2.22453
TRINITY_DN80108_c0_g1_i1	K13514	acyl- :lysophosphatidylglycerol acyltransferase 1	2.22398
TRINITY_DN67149_c0_g1_i1	---NA---	dentin sialophospho - partial	2.22398
TRINITY_DN118663_c3_g1_i1	---NA---	hypothetical protein	2.22398
TRINITY_DN84988_c0_g1_i1	---NA---	hypothetical protein CGI_10003090	2.22398
TRINITY_DN110619_c0_g1_i1	---NA---	hypothetical protein HELRODRAFT_184374	2.22398
TRINITY_DN41495_c0_g1_i1	---NA---	hypothetical protein X975_09790, partial	2.22398
TRINITY_DN82116_c0_g1_i2	---NA---	myosin heavy striated muscle- partial	2.22398
TRINITY_DN144108_c0_g1_i1	---NA---	PREDICTED: uncharacterized protein LOC101241545	2.22398
TRINITY_DN74388_c0_g1_i1	---NA---	Retrovirus-related Pol poly	2.22398
TRINITY_DN131885_c0_g2_i1	---NA---	soluble guanylate cyclase 88E-like	2.22398
TRINITY_DN130469_c0_g1_i2	---NA---	translation initiation factor IF-2-like	2.22398
TRINITY_DN63258_c0_g1_i1	---NA---	tripartite motif-containing 45-like	2.22398
TRINITY_DN135131_c0_g1_i1	K17849	probable E3 ubiquitin- ligase HECTD4	2.2238
TRINITY_DN131676_c0_g2_i2	---NA---	Tetratricopeptide repeat GNN	2.22239
TRINITY_DN96798_c1_g1_i1	K16752	hypothetical protein GUITHDRAFT_83143	2.2222
TRINITY_DN132967_c1_g2_i2	---NA---	calmodulin-alpha	2.21984
TRINITY_DN132957_c1_g2_i1	---NA---	roundabout homolog 1-like	2.21961
TRINITY_DN133891_c1_g1_i4	---NA---	Pleckstrin domain-containing family A member 7	2.2188
TRINITY_DN132444_c0_g3_i1	---NA---	substance-K receptor-like	2.21877
TRINITY_DN132666_c0_g1_i2	K07752	carboxypeptidase D-like	2.21815
TRINITY_DN132190_c1_g1_i1	---NA---	PREDICTED: uncharacterized protein LOC102079738	2.21777
TRINITY_DN134163_c1_g4_i1	---NA---	PREDICTED: uncharacterized protein LOC105438389	2.21641
TRINITY_DN77788_c0_g1_i1	K07830	ras-related R-Ras2-like	2.21636
TRINITY_DN128439_c5_g10_i2	---NA---	glutamate receptor subunit 2 precursor	2.21635
TRINITY_DN129928_c0_g1_i2	---NA---	selenocysteine insertion sequence-binding 2-like	2.21514
TRINITY_DN132979_c1_g1_i1	K01027	succinyl- :3-ketoacid coenzyme A transferase mitochondrial	2.21285
TRINITY_DN127209_c1_g2_i1	---NA---	phosphatidylinositol 3,4,5-trisphosphate 5-phosphatase 2A-like	2.21203
TRINITY_DN131657_c1_g1_i12	---NA---	PREDICTED: uncharacterized protein LOC105330071	2.21144
TRINITY_DN132515_c2_g1_i2	---NA---	MAM and LDL-receptor class A domain-containing 1-like	2.21135
TRINITY_DN135664_c0_g5_i1	---NA---	dynein gamma flagellar outer arm-like	2.21061
TRINITY_DN195613_c0_g1_i1	---NA---	PREDICTED: uncharacterized protein LOC105334055	2.21052
TRINITY_DN133434_c0_g2_i2	K18412	trinucleotide repeat-containing gene 6C -like	2.21019
TRINITY_DN132450_c8_g5_i6	K13886	coronin-1B-like	2.20962
TRINITY_DN135722_c0_g6_i1	K07817	receptor-type tyrosine- phosphatase N2-like	2.20961
TRINITY_DN134926_c9_g1_i2	K05719	integrin beta-PS-like	2.20923
TRINITY_DN134538_c0_g1_i1	---NA---	PREDICTED: uncharacterized protein LOC106811049	2.20733
TRINITY_DN84417_c0_g1_i1	---NA---	PREDICTED: uncharacterized protein LOC105326699	2.20601
TRINITY_DN120023_c0_g1_i1	K00280	Lysyl oxidase 2	2.20572
TRINITY_DN94026_c0_g2_i1	---NA---	PREDICTED: uncharacterized protein LOC105341816	2.2053
TRINITY_DN133374_c1_g1_i3	K06564	cation-independent mannose-6-phosphate receptor-like	2.20529
TRINITY_DN135682_c0_g1_i4	---NA---	RNA-directed DNA polymerase from mobile element jockey-like	2.20513
TRINITY_DN123620_c1_g1_i1	K16743	abnormal spindle-like microcephaly-associated homolog	2.20443
TRINITY_DN133173_c0_g2_i1	K11848	ubiquitin carboxyl-terminal hydrolase 20-like	2.20219
TRINITY_DN128943_c0_g1_i2	K12382	Proactivator polypeptide	2.19884
TRINITY_DN132482_c0_g13_i1	K10408	dynein heavy chain axonemal-like	2.19794
TRINITY_DN132346_c0_g1_i4	K02208	cyclin-dependent kinase 8-like	2.19653
TRINITY_DN112370_c0_g2_i1	K14803	probable phosphatase 2C	2.19439
TRINITY_DN134678_c2_g3_i3	---NA---	PREDICTED: uncharacterized protein LOC102079738	2.19434
TRINITY_DN127680_c0_g2_i4	---NA---	PREDICTED: uncharacterized protein LOC105340281	2.19248
TRINITY_DN135914_c0_g2_i2	---NA---	PREDICTED: uncharacterized protein LOC100888275	2.19245
TRINITY_DN132895_c0_g1_i1	---NA---	golgin subfamily A member 6 22	2.18906	Table S10. Genes highly expressed in the gill of of Archivesica marissinica host.
TRINITY_DN135589_c0_g3_i1	---NA---	PREDICTED: LOW QUALITY PROTEIN: plexin-B	2.18825
TRINITY_DN135998_c2_g6_i1	---NA---	PREDICTED: uncharacterized protein LOC105445930	2.1865
TRINITY_DN132600_c2_g3_i8	---NA---	mitogen-activated kinase-binding 1-like	2.18637
TRINITY_DN56891_c0_g1_i1	K01897	long-chain-fatty-acid-- ligase 1-like	2.18635
TRINITY_DN113487_c0_g1_i1	K00654	serine palmitoyltransferase 2-like	2.18609
TRINITY_DN33042_c0_g1_i1	---NA---	CCR4-NOT transcription complex subunit 6	2.18585
TRINITY_DN135442_c0_g1_i3	---NA---	predicted protein	2.18208
TRINITY_DN135395_c4_g1_i1	---NA---	zinc finger 236-like	2.18095
TRINITY_DN118121_c0_g1_i4	K18460	exportin-7-like	2.17901
TRINITY_DN129616_c0_g1_i2	---NA---	hemoglobin chain I	2.17778
TRINITY_DN115121_c0_g1_i1	---NA---	PREDICTED: uncharacterized protein LOC105348534, partial	2.17597
TRINITY_DN78885_c0_g1_i1	---NA---	programmed cell death 6-like	2.17588
TRINITY_DN130341_c2_g1_i1	K20473	neuroblastoma-amplified sequence-like	2.17573
TRINITY_DN134177_c8_g9_i1	K03462	nicotinamide phosphoribosyltransferase-like	2.17296
TRINITY_DN135935_c0_g3_i1	---NA---	PREDICTED: uncharacterized protein LOC106175329	2.17253
TRINITY_DN132488_c0_g2_i1	K06068	kinase C delta type-like	2.17251
TRINITY_DN135791_c2_g1_i1	---NA---	probable DNA polymerase	2.17202
TRINITY_DN131337_c0_g2_i2	---NA---	synergin gamma-like	2.17189
TRINITY_DN128143_c0_g1_i2	K15009	SH3 and multiple ankyrin repeat domains 3-like	2.17158
TRINITY_DN135049_c2_g3_i1	---NA---	BAH and coiled-coil domain-containing 1	2.17094
TRINITY_DN135033_c0_g1_i5	---NA---	peptidoglycan recognition 1	2.17089
TRINITY_DN96511_c0_g1_i1	K09045	cyclic AMP-dependent transcription factor ATF-2	2.1704
TRINITY_DN111288_c0_g1_i2	---NA---	Tetratricopeptide repeat 28	2.16973
TRINITY_DN120877_c1_g1_i1	K07945	ADP-ribosylation factor 4C	2.16927
TRINITY_DN18808_c0_g1_i1	---NA---	NFX1-type zinc finger-containing 1-like	2.16854
TRINITY_DN75276_c1_g1_i1	---NA---	sprT-like domain-containing Spartan	2.16829
TRINITY_DN123987_c1_g2_i2	---NA---	hypothetical protein CGI_10000765	2.16767
TRINITY_DN105834_c0_g1_i1	---NA---	L-amino-acid oxidase-like	2.16513
TRINITY_DN128486_c0_g1_i1	---NA---	PREDICTED: uncharacterized protein LOC105335378	2.16491
TRINITY_DN123364_c0_g2_i1	---NA---	Protein stoned-B	2.16339
TRINITY_DN135018_c0_g2_i1	K10408	dynein heavy chain axonemal	2.16316
TRINITY_DN108720_c0_g1_i2	K05746	vasodilator-stimulated phospho -like	2.16239
TRINITY_DN136062_c1_g2_i1	---NA---	pol-like protein	2.16157
TRINITY_DN135857_c0_g5_i2	K12818	pre-mRNA-splicing factor ATP-dependent RNA helicase mog-5	2.16048
TRINITY_DN134533_c3_g2_i1	---NA---	laminin subunit alpha-2- partial	2.15973
TRINITY_DN124198_c0_g1_i2	K10359	PREDICTED: myosin-VIIa-like	2.15955
TRINITY_DN129202_c2_g3_i1	---NA---	homeobox Meis1-like	2.15884
TRINITY_DN110073_c0_g1_i1	---NA---	Kyphoscoliosis peptidase	2.15737
TRINITY_DN124223_c0_g1_i2	K04679	zinc finger FYVE domain-containing 16-like	2.15601
TRINITY_DN118372_c0_g1_i2	K06620	transcription factor E2F3-like	2.15509
TRINITY_DN126724_c0_g1_i2	---NA---	ATPase family AAA domain-containing 2-like	2.15507
TRINITY_DN133445_c0_g1_i6	---NA---	death domain-containing CRADD-like	2.15422
TRINITY_DN74197_c0_g1_i1	---NA---	uncharacterized serine-rich -like	2.15422
TRINITY_DN133003_c2_g3_i1	---NA---	TATA element modulatory factor-like	2.15358
TRINITY_DN134310_c0_g4_i3	---NA---	oxidation resistance 1-like	2.15337
TRINITY_DN120212_c2_g1_i2	---NA---	PREDICTED: uncharacterized protein LOC105325762	2.15212
TRINITY_DN124089_c0_g1_i1	K18261	myoferlin-like	2.1511
TRINITY_DN111601_c0_g1_i2	---NA---	galactocerebrosidase-like	2.14993
TRINITY_DN136161_c9_g19_i4	---NA---	transcription intermediary factor 1-alpha-like	2.1497
TRINITY_DN130183_c0_g1_i1	---NA---	Aminopeptidase N	2.14925
TRINITY_DN123383_c2_g2_i1	K12261	2-hydroxyacyl- lyase 1	2.14786
TRINITY_DN131094_c0_g3_i1	---NA---	E3 ubiquitin- ligase HACE1-like	2.14786
TRINITY_DN2941_c0_g1_i1	K09431	ETS translocation variant 1-like	2.14786
TRINITY_DN57408_c2_g1_i1	---NA---	hypothetical protein CGI_10024203	2.14786
TRINITY_DN177021_c0_g1_i1	---NA---	hypothetical protein LOTGIDRAFT_165563	2.14786
TRINITY_DN63927_c0_g1_i1	---NA---	hypothetical protein UY3_02351	2.14786
TRINITY_DN123068_c2_g1_i1	---NA---	intraflagellar transport 56-like	2.14786
TRINITY_DN96981_c0_g1_i1	---NA---	leucine-rich repeat-containing 45-like	2.14786
TRINITY_DN157186_c0_g1_i1	---NA---	patched domain-containing 3-like	2.14786
TRINITY_DN207296_c0_g1_i1	---NA---	PREDICTED: uncharacterized protein F54H12.2-like	2.14786
TRINITY_DN134028_c0_g1_i1	---NA---	PREDICTED: uncharacterized protein LOC100367812	2.14786
TRINITY_DN64822_c0_g1_i1	---NA---	PREDICTED: uncharacterized protein LOC106011084	2.14786
TRINITY_DN15379_c0_g1_i1	---NA---	PREDICTED: uncharacterized protein LOC106152324	2.14786
TRINITY_DN144964_c0_g1_i1	---NA---	PREDICTED: uncharacterized protein LOC106163541	2.14786
TRINITY_DN64579_c0_g2_i1	---NA---	PREDICTED: uncharacterized protein LOC753896	2.14786
TRINITY_DN174117_c0_g1_i1	---NA---	prolyl 4-hydroxylase subunit alpha-1-like	2.14786
TRINITY_DN105461_c0_g1_i1	---NA---	pyridoxal-dependent decarboxylase domain-containing 2	2.14786
TRINITY_DN127221_c0_g1_i1	---NA---	ribosomal S6 kinase alpha-5-like	2.14786
TRINITY_DN127961_c9_g2_i1	---NA---	single-stranded DNA-binding 3-like	2.14786
TRINITY_DN33863_c0_g1_i1	---NA---	uncharacterized family 31 glucosidase KIAA1161-like	2.14786
TRINITY_DN48408_c0_g1_i1	---NA---	Vacuolar sorting-associated 13D	2.14786
TRINITY_DN127426_c0_g1_i1	K13411	dual oxidase 2-like	2.14778
TRINITY_DN134332_c1_g2_i5	---NA---	MLP1-like	2.14644
TRINITY_DN127374_c0_g2_i3	---NA---	B-box type zinc finger ncl-1-like	2.14578
TRINITY_DN132356_c5_g1_i2	K20050	Low-density lipo receptor-related partial	2.14498
TRINITY_DN260_c0_g2_i1	---NA---	potassium voltage-gated channel Shaw-like	2.14482
TRINITY_DN131894_c2_g3_i2	---NA---	PREDICTED: uncharacterized protein LOC105327310	2.14469
TRINITY_DN117433_c0_g1_i1	---NA---	hypothetical transcript	2.14452
TRINITY_DN134513_c0_g1_i3	---NA---	PREDICTED: uncharacterized protein LOC105844746	2.14363
TRINITY_DN115703_c0_g1_i1	K10800	single-strand selective monofunctional uracil DNA glycosylase	2.14322
TRINITY_DN126196_c0_g1_i3	K20042	F-BAR domain only 2-like	2.14198
TRINITY_DN132679_c1_g3_i1	K11165	dehydrogenase reductase SDR family member 7-like	2.14148
TRINITY_DN136048_c1_g3_i1	---NA---	PREDICTED: uncharacterized protein LOC106097639	2.14099
TRINITY_DN171197_c0_g1_i1	---NA---	Sulfatase-modifying factor 2	2.13979
TRINITY_DN134549_c2_g2_i2	---NA---	PREDICTED: uncharacterized protein LOC106180531	2.13899
TRINITY_DN131705_c1_g3_i1	K08730	phosphatidylserine synthase 2-like	2.13893
TRINITY_DN182329_c0_g1_i1	---NA---	Atrial natriuretic peptide receptor 1	2.13598
TRINITY_DN111736_c0_g3_i1	K14427	solute carrier family 12 member 4-like	2.13516
TRINITY_DN127471_c0_g4_i2	K04468	serine threonine- kinase NLK-like	2.13404
TRINITY_DN104460_c0_g1_i1	---NA---	hypothetical protein NEMVEDRAFT_v1g146717	2.13288
TRINITY_DN118328_c0_g2_i1	---NA---	PDZ domain-containing 8	2.13288
TRINITY_DN72634_c0_g1_i1	---NA---	PREDICTED: uncharacterized protein LOC105332214	2.13288
TRINITY_DN87768_c1_g1_i1	---NA---	phthiocerol synthesis polyketide synthase type I -like	2.13282
TRINITY_DN86828_c0_g1_i3	---NA---	Y+L amino acid transporter 2-like	2.13167
TRINITY_DN9983_c0_g1_i1	---NA---	zinc finger 92 homolog	2.12904
TRINITY_DN127611_c0_g1_i3	K05463	Ephrin-B2	2.12863
TRINITY_DN105688_c0_g1_i1	K14343	ileal sodium bile acid cotransporter-like	2.12824
TRINITY_DN132416_c0_g2_i1	K07408	cytochrome P450 family 1-like 1	2.1274
TRINITY_DN132874_c2_g3_i1	---NA---	PDZ domain-containing 2	2.12615
TRINITY_DN127950_c0_g2_i1	---NA---	lateral signaling target 2 homolog	2.12588
TRINITY_DN107552_c2_g1_i1	---NA---	sodium- and chloride-dependent glycine transporter 1-like	2.12582
TRINITY_DN100117_c0_g1_i1	K11255	serine threonine- kinase phg2-like	2.12395
TRINITY_DN134463_c3_g1_i1	---NA---	hypothetical protein LOTGIDRAFT_169056	2.12285
TRINITY_DN119886_c0_g3_i1	K16498	protocadherin beta-15-like	2.12277
TRINITY_DN123398_c1_g1_i1	---NA---	solute carrier family 12 member 1-like	2.12043
TRINITY_DN94398_c0_g1_i1	---NA---	hypothetical protein CAPTEDRAFT_188324	2.12014
TRINITY_DN132914_c3_g1_i3	K06070	serine threonine- kinase D3-like	2.11991
TRINITY_DN125633_c0_g1_i3	K17044	RING finger 166-like	2.11921
TRINITY_DN54163_c0_g1_i1	---NA---	TAR DNA-binding 43-like	2.11914
TRINITY_DN128580_c0_g1_i2	K11251	core histone macro- -like	2.11871
TRINITY_DN135414_c0_g1_i1	---NA---	PREDICTED: uncharacterized protein LOC105332214	2.11871
TRINITY_DN135798_c2_g1_i10	---NA---	NFX1-type zinc finger-containing 1	2.11752
TRINITY_DN133567_c1_g3_i1	K00901	diacylglycerol kinase delta-like	2.11559
TRINITY_DN158040_c0_g1_i1	---NA---	citron Rho-interacting kinase-like	2.11513
TRINITY_DN87816_c1_g1_i1	---NA---	interleukin-17 receptor A-like	2.1149
TRINITY_DN129803_c1_g3_i3	---NA---	cGMP-inhibited 3 ,5 -cyclic phosphodiesterase A-like	2.11422
TRINITY_DN135640_c3_g1_i1	---NA---	latrophilin and seven transmembrane domain-containing 1-like	2.11391
TRINITY_DN126024_c0_g1_i1	---NA---	piggyBac transposable element-derived 4-like	2.11264
TRINITY_DN133054_c10_g2_i2	K09095	endothelial PAS domain-containing 1-like	2.11261
TRINITY_DN132781_c1_g1_i1	K20279	synaptojanin-1-like	2.1123
TRINITY_DN135145_c1_g2_i2	---NA---	Multiple epidermal growth factor-like domains 9	2.1116
TRINITY_DN126084_c0_g2_i3	K06057	numb-like	2.11157
TRINITY_DN145494_c0_g1_i1	---NA---	hypothetical protein CGI_10015902	2.11156
TRINITY_DN33209_c0_g1_i1	---NA---	Low-density lipo receptor-related 1B	2.11145
TRINITY_DN136025_c1_g1_i12	---NA---	piggyBac transposable element-derived 4-like	2.11097
TRINITY_DN113140_c0_g1_i1	K19949	otoferlin-like	2.11008
TRINITY_DN134538_c0_g2_i1	---NA---	PREDICTED: uncharacterized protein LOC106811049	2.10875
TRINITY_DN72912_c0_g1_i1	K19695	hippocalcin 1	2.10798
TRINITY_DN132207_c2_g3_i1	K09205	Krueppel-like factor 8	2.10732
TRINITY_DN133865_c1_g5_i1	K19525	vacuolar sorting-associated 13A- partial	2.10693
TRINITY_DN79706_c0_g3_i1	---NA---	PCTP	2.10672
TRINITY_DN126009_c11_g1_i1	---NA---	hypothetical protein BRAFLDRAFT_69759	2.10632
TRINITY_DN132578_c0_g1_i1	---NA---	LIM homeobox Lhx6	2.10563
TRINITY_DN51047_c0_g1_i1	---NA---	Patched domain-containing 3	2.10518
TRINITY_DN135151_c0_g3_i1	---NA---	PREDICTED: uncharacterized protein LOC105324423	2.10518
TRINITY_DN119600_c0_g2_i2	---NA---	tigger transposable element-derived 4- partial	2.10398
TRINITY_DN132049_c0_g7_i6	---NA---	zinc finger MIZ domain-containing 1-like	2.10341
TRINITY_DN133530_c8_g3_i2	---NA---	neurofilament heavy polypeptide-like	2.10278
TRINITY_DN136171_c0_g1_i2	---NA---	hypothetical protein cypCar_00041763	2.10203
TRINITY_DN124616_c0_g1_i1	---NA---	DNA-binding Ikaros-like	2.10198
TRINITY_DN113240_c0_g3_i1	K01127	phosphatidylinositol-glycan-specific phospholipase D	2.10198
TRINITY_DN135589_c0_g2_i15	---NA---	plexin-B	2.10161
TRINITY_DN136144_c2_g1_i10	---NA---	zinc finger 862-like	2.10132
TRINITY_DN136083_c1_g1_i5	---NA---	PREDICTED: uncharacterized protein LOC106151732	2.10074
TRINITY_DN127233_c0_g1_i1	---NA---	WD repeat-containing 20-like	2.10053
TRINITY_DN131255_c3_g3_i1	K04707	E3 ubiquitin- ligase CBL-B-like	2.09912
TRINITY_DN135887_c3_g2_i3	---NA---	hypothetical protein OCBIM_22006428mg, partial	2.09864
TRINITY_DN116355_c0_g1_i1	---NA---	transcriptional regulator ATRX-like	2.09701
TRINITY_DN109373_c0_g1_i3	---NA---	Alstrom syndrome 1	2.09485
TRINITY_DN204876_c0_g1_i1	K01107	inositol polyphosphate 1-phosphatase-like	2.09252
TRINITY_DN127961_c9_g1_i4	---NA---	single-stranded DNA-binding 3-like	2.09188
TRINITY_DN74146_c0_g1_i1	---NA---	stress DDR48-like	2.09143
TRINITY_DN103181_c0_g1_i1	---NA---	PREDICTED: uncharacterized protein LOC106876577	2.09007
TRINITY_DN136227_c0_g1_i1	---NA---	sacsin-like	2.08876
TRINITY_DN134024_c2_g1_i1	---NA---	zinc finger 862-like	2.08729
TRINITY_DN113347_c0_g1_i1	---NA---	protogenin B-like	2.08728
TRINITY_DN135024_c6_g1_i2	---NA---	RNA-directed DNA polymerase from mobile element jockey-like	2.08647
TRINITY_DN2320_c0_g2_i1	---NA---	Calphotin CG4795-PA ( )	2.08608
TRINITY_DN136054_c2_g2_i1	---NA---	zinc finger 862-like	2.08452
TRINITY_DN93929_c0_g1_i1	K17543	slowpoke-binding -like	2.08371
TRINITY_DN136068_c4_g4_i3	---NA---	RNA-directed DNA polymerase from mobile element partial	2.08325
TRINITY_DN117344_c0_g2_i2	K11796	short transient receptor potential channel 4-associated -like	2.08289
TRINITY_DN121246_c0_g1_i1	K13704	monoacylglycerol lipase ABHD12-like	2.08244
TRINITY_DN135170_c2_g1_i2	---NA---	hypothetical protein CGI_10013018	2.0814
TRINITY_DN133328_c1_g4_i1	---NA---	UPF0378 KIAA0100-like	2.08137
TRINITY_DN53348_c0_g1_i1	---NA---	neurocalcin homolog	2.07801
TRINITY_DN132444_c0_g4_i1	K17585	phosphatase and actin regulator 4-like	2.07739
TRINITY_DN134255_c0_g1_i1	---NA---	PREDICTED: uncharacterized protein LOC101845075	2.07616
TRINITY_DN122334_c0_g1_i2	K16728	centrosomal of 152 kDa-like	2.07578
TRINITY_DN127628_c0_g2_i1	---NA---	transcription initiation factor TFIID subunit 1- partial	2.07467
TRINITY_DN134447_c0_g2_i2	---NA---	membrane primary amine oxidase-like	2.07352
TRINITY_DN136157_c1_g2_i1	---NA---	TPA_exp: poly	2.07343
TRINITY_DN135130_c1_g6_i1	K11182	Amiloride-sensitive amine oxidase [copper-containing]	2.07304
TRINITY_DN134454_c4_g3_i1	K17533	ankyrin-2-like	2.07289
TRINITY_DN125144_c1_g1_i1	K08892	tyrosine- kinase Src42A-like	2.07253
TRINITY_DN112252_c0_g1_i2	K20526	myophilin-like	2.07226
TRINITY_DN135894_c2_g5_i1	---NA---	piggyBac transposable element-derived 4-like	2.07199
TRINITY_DN135548_c2_g1_i5	---NA---	defense 3	2.07092
TRINITY_DN61387_c0_g1_i1	---NA---	G- coupled receptor 126- partial	2.06996
TRINITY_DN127354_c0_g1_i1	---NA---	CAS1 domain-containing 1-like	2.06755
TRINITY_DN65885_c1_g1_i1	---NA---	dual specificity tyrosine-phosphorylation-regulated kinase 4-like	2.06755
TRINITY_DN67414_c1_g1_i1	---NA---	dynein beta ciliary-like	2.06755
TRINITY_DN102880_c0_g2_i1	---NA---	gag-pol fusion	2.06755
TRINITY_DN187323_c0_g1_i1	---NA---	glutamate receptor kainate 3-like	2.06755
TRINITY_DN60052_c0_g1_i1	---NA---	hypothetical protein LOTGIDRAFT_230633	2.06755
TRINITY_DN100153_c1_g1_i1	---NA---	leucine-rich repeat-containing 74B-like	2.06755
TRINITY_DN44534_c1_g1_i1	---NA---	RNA-directed DNA polymerase from mobile element jockey-like	2.06755
TRINITY_DN133855_c10_g2_i1	K11824	AP-2 complex subunit alpha	2.0673
TRINITY_DN131774_c2_g4_i1	K20071	rho GTPase-activating 26-like	2.06671
TRINITY_DN130028_c1_g4_i1	K14971	serine-rich adhesin for platelets-like	2.06526
TRINITY_DN132382_c0_g2_i1	K19613	leucine-rich repeat SHOC-2-like	2.06488
TRINITY_DN113161_c0_g3_i1	---NA---	PREDICTED: uncharacterized protein LOC105328589	2.06363
TRINITY_DN87714_c0_g2_i1	---NA---	cell wall integrity and stress response component 1-like	2.06357
TRINITY_DN132967_c1_g1_i1	---NA---	calmodulin	2.06321
TRINITY_DN129768_c1_g3_i2	---NA---	histidine-rich PFHRP-III-like	2.06317
TRINITY_DN133573_c0_g1_i2	K16172	filaggrin-like	2.06159
TRINITY_DN131921_c0_g1_i1	---NA---	hypothetical protein LOTGIDRAFT_154995	2.06145
TRINITY_DN135156_c0_g2_i3	---NA---	von Willebrand factor D and EGF domain-containing	2.06072
TRINITY_DN187602_c0_g1_i1	---NA---	nuclear receptor subfamily 1 group D member 2-like	2.06033
TRINITY_DN132300_c0_g4_i1	K20283	golgin subfamily A member 4-like	2.05991
TRINITY_DN130516_c3_g2_i2	K05060	leukemia inhibitory factor receptor-like	2.05913
TRINITY_DN129579_c1_g2_i2	K19937	rab3 GTPase-activating non-catalytic subunit-like	2.05832
TRINITY_DN100437_c0_g1_i1	---NA---	NACHT and WD repeat domain-containing 1	2.05593
TRINITY_DN127837_c0_g1_i1	---NA---	fatty acid synthase-like	2.05579
TRINITY_DN135145_c1_g3_i1	---NA---	collagen alpha-3(VI) chain	2.05531
TRINITY_DN128076_c0_g1_i4	K20641	PREDICTED: uncharacterized protein LOC106052139	2.05484
TRINITY_DN126965_c0_g1_i2	K20631	rho GTPase-activating 6-like	2.0548
TRINITY_DN92419_c0_g2_i1	---NA---	ras-related C3 botulinum toxin substrate 1	2.05425
TRINITY_DN125358_c0_g2_i1	K11318	ataxin-7 1	2.05402
TRINITY_DN121635_c0_g1_i1	K11536	Solute carrier family 28 member 3	2.05284
TRINITY_DN123420_c0_g1_i1	---NA---	importin subunit alpha-4-like	2.0525
TRINITY_DN132440_c0_g4_i20	K09172	nuclear factor 1 X-type-like	2.05194
TRINITY_DN126762_c1_g2_i1	K09533	dnaJ homolog subfamily C member 13-like	2.05118
TRINITY_DN126620_c0_g1_i1	---NA---	NF-kappa-B inhibitor alpha-like	2.05093
TRINITY_DN110072_c2_g1_i1	---NA---	PREDICTED: uncharacterized protein LOC105336348, partial	2.04877
TRINITY_DN65997_c0_g1_i1	---NA---	myosin-M heavy chain-like	2.04866
TRINITY_DN135105_c7_g1_i11	K01283	Angiotensin-converting enzyme	2.04802
TRINITY_DN118616_c0_g1_i1	---NA---	zinc finger with UFM1-specific peptidase domain -like	2.04527
TRINITY_DN135986_c0_g2_i2	---NA---	RNA-directed DNA polymerase from mobile element jockey-like	2.04469
TRINITY_DN82096_c0_g1_i1	K07903	ras-related Rab-10-like	2.04317
TRINITY_DN123294_c0_g2_i1	K10356	unconventional myosin-Id-like	2.04244
TRINITY_DN132875_c5_g2_i1	K11348	peregrin-like	2.04211
TRINITY_DN135826_c1_g6_i1	---NA---	piggyBac transposable element-derived 4-like	2.04185
TRINITY_DN87448_c0_g2_i1	K08886	activated CDC42 kinase 1-like	2.04029
TRINITY_DN125614_c0_g2_i1	K13143	integrator complex subunit 6-like	2.03998
TRINITY_DN112142_c1_g2_i2	K16822	flocculation FLO11-like	2.03983
TRINITY_DN134592_c0_g1_i1	---NA---	hypothetical protein CAPTEDRAFT_216620	2.03983
TRINITY_DN64902_c0_g2_i1	---NA---	E3 ubiquitin- ligase ZNRF2-like	2.03966
TRINITY_DN133699_c2_g4_i1	---NA---	Pleckstrin domain-containing family G member 1	2.03916
TRINITY_DN136171_c0_g2_i2	---NA---	hypothetical protein CGI_10015106	2.03902
TRINITY_DN131330_c0_g2_i1	K12485	rab11 family-interacting 4A-like	2.03893
TRINITY_DN109200_c0_g1_i1	K06633	membrane-associated tyrosine- and threonine-specific cdc2-inhibitory kinase-like	2.0349
TRINITY_DN117211_c0_g3_i1	---NA---	Round spermatid basic 1	2.0344
TRINITY_DN127836_c1_g2_i1	---NA---	zinc finger 862-like	2.03428
TRINITY_DN118381_c0_g1_i1	---NA---	epoxide hydrolase 4-like	2.03412
TRINITY_DN133239_c8_g2_i1	---NA---	[Pyruvate dehydrogenase (acetyl-transferring)] kinase isozyme mitochondrial	2.03387
TRINITY_DN85234_c0_g1_i1	---NA---	proteoglycan 4-like	2.03387
TRINITY_DN125567_c0_g1_i2	---NA---	UPF0394 inner membrane yeeE	2.03253
TRINITY_DN136137_c3_g1_i1	---NA---	PREDICTED: uncharacterized protein LOC106811049	2.03249
TRINITY_DN95581_c3_g1_i1	---NA---	inverted formin-2-like	2.03216
TRINITY_DN113585_c0_g1_i1	---NA---	zinc finger BED domain-containing 4-like	2.03216
TRINITY_DN134420_c9_g1_i5	---NA---	hypothetical protein DAPPUDRAFT_305262	2.03102
TRINITY_DN158914_c0_g1_i1	---NA---	PREDICTED: triadin-like	2.03086
[truncated: 5,877 more rows]

## Sheet: Table S7
Table S7. The top 10% of the highest expressed genes in the gill of Phreagena okutanii host. Gene expression levels are expressed as the value of transcripts per million (TPM).
Name	NR annotation	Rank	Gill TPM
TRINITY_DN98443_c0_g2_i1	gastrula zinc finger protein XlCGF8.2DB-like	1	142118
TRINITY_DN68796_c1_g7_i3	carbonic anhydrase 255	2	88817.3
TRINITY_DN58104_c0_g1_i1	glutathione peroxidase A 223	3	69277.2
TRINITY_DN76391_c0_g1_i1	UPF0193 protein EVG1-like 174	4	64534.9
TRINITY_DN68220_c4_g13_i1	prefoldin subunit 2-like 113	5	44371.6
TRINITY_DN55248_c0_g3_i8	protein phosphatase 1 regulatory subunit 21-like isoform X2 351	6	24768.5
TRINITY_DN65492_c10_g5_i1	hemoglobin I 146	7	14564.5
TRINITY_DN65659_c1_g1_i5	hemoglobin II 138	8	14210.7
TRINITY_DN67920_c1_g3_i1	---NA---	9	13510.7
TRINITY_DN65873_c10_g1_i10	ferritin 2 174	10	13325.3
TRINITY_DN67969_c0_g1_i3	hypothetical protein BOX15_Mlig031370g1	11	10960.4
TRINITY_DN65100_c1_g1_i9	probable aminopeptidase NPEPL1 252	12	7969.37
TRINITY_DN15364_c0_g1_i1	---NA---	13	5686.28
TRINITY_DN66668_c0_g2_i5	big defensin 117	14	5284.43
TRINITY_DN65517_c4_g17_i1	hypothetical protein	15	5162.9
TRINITY_DN19123_c0_g1_i1	---NA---	16	5158.55
TRINITY_DN67920_c1_g4_i2	---NA---	17	5153.26
TRINITY_DN67733_c0_g1_i8	hemoglobin III 140	18	4087.86
TRINITY_DN65839_c3_g8_i4	predicted protein	19	4017.25
TRINITY_DN61667_c0_g1_i3	polyubiquitin-C-like 203	20	3875.82
TRINITY_DN66756_c3_g1_i1	predicted protein 377	21	3731.32
TRINITY_DN70721_c0_g1_i1	40S ribosomal protein S23 142	22	2595.88
TRINITY_DN55687_c0_g2_i1	ribosomal protein S12 139	23	2555.01
TRINITY_DN47665_c0_g1_i1	---NA---	24	2513.66
TRINITY_DN65851_c0_g3_i1	elongation factor 1-alpha 463	25	2498.04
TRINITY_DN65492_c8_g1_i1	ribosomal protein 135	26	2416.81
TRINITY_DN48256_c0_g1_i1	ribosomal protein 114	27	2389.9
TRINITY_DN85743_c0_g1_i1	40S ribosomal protein S8 209	28	2297.97
TRINITY_DN76179_c0_g1_i1	ribosomal protein S7 195	29	2253.18
TRINITY_DN382_c0_g1_i1	40S ribosomal protein S3a 283	30	2152.45
TRINITY_DN107588_c0_g1_i1	60S ribosomal protein L14-like 148	31	2076.42
TRINITY_DN38736_c0_g1_i1	60S ribosomal protein L7a 267	32	2061.33
TRINITY_DN75886_c0_g1_i1	40S ribosomal protein S15Aa 137	33	2052.37
TRINITY_DN57488_c0_g1_i3	arginase type I-like protein 375	34	2011.54
TRINITY_DN42075_c0_g3_i1	40S ribosomal protein S16 149	35	2001.44
TRINITY_DN66951_c0_g8_i1	40S ribosomal protein S24 134	36	1925.56
TRINITY_DN45838_c0_g1_i1	2YPM_AChain A, LAFCA THIOREDOXIN 107	37	1913.53
TRINITY_DN24913_c0_g2_i1	40S ribosomal protein S17 153	38	1897.04
TRINITY_DN68877_c3_g3_i2	proline-rich transmembrane protein 1-like 134	39	1862.2
TRINITY_DN68748_c3_g3_i3	hemocyte protein-glutamine gamma-glutamyltransferase-like 179	40	1789.29
TRINITY_DN67310_c0_g1_i1	60S ribosomal protein L5 298	41	1788.46
TRINITY_DN66656_c1_g5_i3	heat shock protein 70 505	42	1774.75
TRINITY_DN63091_c0_g1_i1	ribosomal protein S6 244	43	1772.99
TRINITY_DN18903_c0_g1_i1	40S ribosomal protein S26-like isoform X2 128	44	1761.54
TRINITY_DN7093_c0_g1_i1	40S ribosomal protein S14 152	45	1757.39
TRINITY_DN62806_c1_g1_i2	60S ribosomal protein L26 isoform X1 152	46	1750.86
TRINITY_DN49355_c0_g1_i3	60S ribosomal protein 179	47	1730.52
TRINITY_DN8317_c0_g2_i1	ubiquitin-like protein FUBI 142	48	1667.67
TRINITY_DN48591_c0_g1_i1	60S ribosomal protein L17-like 193	49	1659.5
TRINITY_DN12591_c0_g1_i1	60S ribosomal protein L31-like 142	50	1634.08
TRINITY_DN22071_c0_g1_i1	40S ribosomal protein S18 154	51	1617.56
TRINITY_DN60963_c0_g2_i3	mitochondrial ATP synthase subunit 9 138	52	1594.06
TRINITY_DN3300_c0_g1_i1	probable 60S ribosomal protein L37-A 102	53	1593.38
TRINITY_DN94333_c0_g1_i1	receptor for activated C kinase 1 320	54	1578.03
TRINITY_DN62488_c0_g3_i1	countin-1 263	55	1546.77
TRINITY_DN85136_c0_g1_i1	40S ribosomal protein S13 153	56	1489.09
TRINITY_DN54881_c0_g1_i1	40S ribosomal protein S10-like 195	57	1487.15
TRINITY_DN67807_c0_g1_i3	C1q domain-containing protein DC33 174	58	1478.47
TRINITY_DN32452_c0_g1_i2	60S ribosomal protein L18a-like 182	59	1465.33
TRINITY_DN18168_c0_g2_i1	60S ribosomal protein L8 265	60	1458.39
TRINITY_DN66201_c6_g4_i2	ubiquitin-40S ribosomal protein S27a-like 160	61	1446.59
TRINITY_DN43570_c0_g2_i1	60S ribosomal protein L13A 204	62	1436.25
TRINITY_DN54495_c0_g1_i1	60S ribosomal protein L22-like 137	63	1433.6
TRINITY_DN46854_c0_g1_i1	60S ribosomal protein L34-like 116	64	1424.1
TRINITY_DN58530_c0_g1_i1	40S ribosomal protein S25-like 117	65	1411.27
TRINITY_DN60122_c1_g1_i1	---NA---	66	1396.44
TRINITY_DN62428_c1_g2_i1	60S acidic ribosomal protein P1-like 112	67	1392.4
TRINITY_DN68443_c1_g8_i6	RecName: Full=Tubulin beta chain; AltName: Full=Beta-tubulin 257	68	1372.28
TRINITY_DN84905_c0_g2_i1	60S ribosomal protein L6 219	69	1371.51
TRINITY_DN61894_c0_g1_i3	60S ribosomal protein L3-like 407	70	1361.96
TRINITY_DN25740_c0_g1_i1	QM protein 219	71	1351.96
TRINITY_DN12184_c0_g2_i1	60S ribosomal protein L27 137	72	1320.86
TRINITY_DN68539_c0_g11_i1	---NA---	73	1307.56
TRINITY_DN50064_c0_g1_i1	proline-rich transmembrane protein 1-like 113	74	1303.88
TRINITY_DN68043_c0_g2_i2	60S ribosomal protein L9-like 196	75	1284.58
TRINITY_DN372_c0_g1_i1	40S ribosomal protein S20 118	76	1257.07
TRINITY_DN43470_c0_g1_i1	60S ribosomal protein L19-like 200	77	1256
TRINITY_DN58128_c0_g2_i1	40S ribosomal protein S4-like 263	78	1239.52
TRINITY_DN19362_c0_g1_i1	40S ribosomal protein S11-like 157	79	1237.04
TRINITY_DN67787_c0_g1_i4	ribosomal protein L30 115	80	1223.09
TRINITY_DN63981_c0_g2_i1	ribosomal protein L22 149	81	1221.56
TRINITY_DN52902_c1_g2_i1	60S ribosomal protein L36 isoform X2 109	82	1218.67
TRINITY_DN64541_c2_g1_i3	putative ribosomal protein S15 151	83	1208.47
TRINITY_DN24866_c0_g1_i1	ribosomal protein L21 161	84	1199.07
TRINITY_DN1246_c0_g1_i1	40S ribosomal protein S3 244	85	1197.09
TRINITY_DN43498_c0_g2_i1	60S ribosomal protein L7 245	86	1195.41
TRINITY_DN67624_c1_g6_i7	tubulin alpha-1A chain isoform X1 200	87	1161.39
TRINITY_DN66030_c1_g4_i1	ribosomal protein L12 166	88	1130.75
TRINITY_DN26846_c0_g1_i1	ceramide synthase 2-like protein 158	89	1124.6
TRINITY_DN67431_c10_g4_i2	Universal stress protein in QAH/OAS sulfhydrylase 3'region 127	90	1114.7
TRINITY_DN60702_c0_g2_i1	60S ribosomal protein L10a-like 220	91	1112.19
TRINITY_DN66436_c7_g22_i13	gamma-glutamyltranspeptidase 1-like 361	92	1111.02
TRINITY_DN62018_c0_g1_i1	Conodipine-M alpha chain 143	93	1094.63
TRINITY_DN59628_c0_g5_i1	60S ribosomal protein L44-like 127	94	1090.96
TRINITY_DN57467_c0_g1_i1	60S acidic ribosomal protein P0-like 316	95	1068.61
TRINITY_DN35248_c0_g1_i1	60S ribosomal protein L15-like 205	96	1062.04
TRINITY_DN61449_c2_g2_i1	peptidyl-prolyl cis-trans isomerase-like 165	97	1055.83
TRINITY_DN68443_c1_g6_i1	tubulin beta chain-like 133	98	1055.44
TRINITY_DN55780_c2_g2_i1	60S ribosomal protein L18-like 191	99	1054.28
TRINITY_DN105207_c0_g1_i1	lethal -2 6225 130	100	997.624
TRINITY_DN68289_c0_g4_i1	tandem repeat galectin 310	101	972.764
TRINITY_DN66089_c1_g1_i1	elongation factor 2 853	102	968.936
TRINITY_DN62079_c0_g1_i4	laminin receptor 315	103	967.428
TRINITY_DN65633_c0_g3_i1	thioredoxin peroxidase 199	104	944.985
TRINITY_DN66383_c0_g3_i2	ribosomal protein rpl23a 172	105	932.812
TRINITY_DN34874_c0_g1_i2	adenosylhomocysteinase A 434	106	915.963
TRINITY_DN65172_c3_g6_i1	translationally controlled tumor protein 218	107	915.157
TRINITY_DN67648_c8_g1_i1	tubulin beta-4B chain-like 112	108	910.27
TRINITY_DN10477_c0_g1_i1	nucleoside diphosphate kinase B 157	109	889.554
TRINITY_DN57549_c2_g5_i1	---NA---	110	882.152
TRINITY_DN58814_c0_g1_i1	ribosomal protein S9 192	111	882.111
TRINITY_DN21483_c0_g1_i1	---NA---	112	876.665
TRINITY_DN33007_c0_g1_i1	60S ribosomal protein L35-like 130	113	860.419
TRINITY_DN96018_c0_g1_i1	ribosomal protein rpl24 156	114	847.812
TRINITY_DN64333_c1_g1_i1	transcription factor BTF3 homolog 4-like 175	115	845.405
TRINITY_DN12092_c0_g2_i1	60S ribosomal protein L35a-like 125	116	823.258
TRINITY_DN66571_c0_g8_i18	---NA---	117	814.12
TRINITY_DN66534_c2_g1_i2	ammonium transporter Rh type A 501	118	809.656
TRINITY_DN10597_c0_g2_i1	60S ribosomal protein L37a 105	119	808.584
TRINITY_DN65157_c0_g2_i3	---NA---	120	785.127
TRINITY_DN57686_c0_g1_i1	40S ribosomal protein S2 278	121	784.012
TRINITY_DN61642_c0_g1_i1	heat shock protein 90 731	122	782.346
TRINITY_DN66784_c2_g1_i7	zinc finger BED domain-containing protein 4-like isoform X5	123	777.607
TRINITY_DN67479_c3_g9_i2	40S ribosomal protein S5 205	124	765.896
TRINITY_DN68306_c202_g9_i1	Muscarinic acetylcholine receptor M3 392	125	759.522
TRINITY_DN65588_c0_g1_i1	gamma-glutamyltranspeptidase 1-like 185	126	750.559
TRINITY_DN22527_c0_g1_i1	nascent polypeptide-associated complex subunit alpha-like 211	127	741.385
TRINITY_DN24222_c0_g2_i1	60S ribosomal protein L13-like 215	128	739.014
TRINITY_DN32455_c0_g1_i1	uncharacterized protein LOC113402801	129	735
TRINITY_DN64314_c4_g10_i1	actin depolymerizing factor ADF/cofilin 143	130	726.47
TRINITY_DN66685_c0_g3_i1	---NA---	131	713.017
TRINITY_DN21550_c0_g2_i1	60S ribosomal protein L4 399	132	709.21
TRINITY_DN44254_c0_g1_i1	---NA---	133	705.979
TRINITY_DN65251_c0_g1_i2	protein SET-like 279	134	702.822
TRINITY_DN55394_c0_g1_i1	---NA---	135	692.461
TRINITY_DN65079_c1_g1_i3	---NA---	136	683.813
TRINITY_DN57982_c0_g1_i1	ribosomal protein rpl23 140	137	666.782
TRINITY_DN67804_c2_g4_i2	lysosome-associated membrane glycoprotein 1-like 289	138	653.603
TRINITY_DN68527_c5_g3_i1	---NA---	139	649.655
TRINITY_DN68775_c3_g2_i2	---NA---	140	615.88
TRINITY_DN58555_c1_g2_i1	RecName: Full=40S ribosomal protein S19 145	141	614.674
TRINITY_DN55495_c0_g1_i2	Histone H3	142	600.266
TRINITY_DN27848_c1_g1_i1	predicted protein	143	598.038
TRINITY_DN44370_c0_g1_i1	Nuclear receptor ROR-alpha 217	144	594.483
TRINITY_DN67811_c1_g3_i1	phage lysozyme 1 114	145	593.692
TRINITY_DN35970_c0_g1_i1	metalloproteinase inhibitor 3-like	146	592.457
TRINITY_DN65807_c0_g1_i4	---NA---	147	592.242
TRINITY_DN49375_c0_g1_i1	ATP synthase subunit beta, mitochondrial-like 533	148	583.298
TRINITY_DN62662_c0_g4_i1	ADP,ATP carrier protein 3, mitochondrial-like 307	149	578.234
TRINITY_DN54673_c0_g2_i1	mitochondrial H+ ATPase a subunit 555	150	577.999
TRINITY_DN59118_c0_g1_i1	Y-box protein 261	151	575.749
TRINITY_DN110797_c0_g2_i1	---NA---	152	567.507
TRINITY_DN62686_c0_g3_i1	tubulin alpha-3 chain-like 121	153	558.568
TRINITY_DN67492_c1_g3_i9	gamma-glutamyltranspeptidase 1-like 148	154	556.208
TRINITY_DN66545_c0_g1_i4	heterogeneous nuclear ribonucleoprotein A1, A2/B1 homolog 316	155	554.963
TRINITY_DN67845_c0_g2_i1	RNA-directed DNA polymerase from mobile element jockey-like 104	156	552.821
TRINITY_DN68748_c3_g7_i3	hemocyte protein-glutamine gamma-glutamyltransferase-like isoform X1 335	157	546.051
TRINITY_DN68748_c3_g14_i1	hemocyte protein-glutamine gamma-glutamyltransferase-like isoform X2 194	158	539.495
TRINITY_DN63813_c0_g8_i2	polyubiquitin-C 180	159	535.241
TRINITY_DN114453_c0_g1_i1	putative defense protein 3	160	531.56
TRINITY_DN52785_c0_g2_i3	protein PLANT CADMIUM RESISTANCE 3-like 108	161	525.532
TRINITY_DN67860_c5_g1_i3	hypothetical protein BRAFLDRAFT_171950 205	162	520.843
TRINITY_DN67624_c1_g3_i1	tubulin alpha-1A chain-like 345	163	520.778
TRINITY_DN68315_c0_g11_i1	---NA---	164	511.994
TRINITY_DN47200_c0_g1_i1	GPx isotype 2 114	165	504.408
TRINITY_DN60096_c0_g3_i1	elongation factor 1-beta-like 217	166	497.243
TRINITY_DN45734_c0_g1_i1	F type H transporting ATPase subunit e	167	488.747
TRINITY_DN66747_c0_g1_i1	tubulin alpha chain 204	168	486.657
TRINITY_DN67857_c4_g5_i1	---NA---	169	486.407
TRINITY_DN53443_c0_g1_i1	polyadenylate-binding protein 4-like 645	170	481.958
TRINITY_DN66436_c7_g11_i1	gamma-glutamyltranspeptidase 1 isoform X1 620	171	480.797
TRINITY_DN19914_c0_g1_i1	HAMP domain-containing protein	172	472.608
TRINITY_DN68310_c3_g2_i2	---NA---	173	462.884
TRINITY_DN65221_c2_g1_i8	haloacid dehalogenase-like hydrolase domain-containing 5 isoform X1 472	174	456.622
TRINITY_DN54768_c0_g2_i3	elongation factor 1-delta-like isoform X2 289	175	451.42
TRINITY_DN64016_c0_g8_i1	DNA-directed RNA polymerase	176	451.32
TRINITY_DN49986_c0_g3_i1	---NA---	177	450.77
TRINITY_DN64890_c0_g1_i2	---NA---	178	450.337
TRINITY_DN68681_c5_g1_i4	interferon-induced protein 44-like 123	179	449.946
TRINITY_DN38163_c0_g2_i1	uncharacterized protein LOC106173896	180	449.645
TRINITY_DN68733_c2_g3_i2	heterogeneous nuclear ribonucleoprotein A1, A2/B1 homolog isoform X3 175	181	447.247
TRINITY_DN73584_c0_g1_i1	---NA---	182	446.883
TRINITY_DN65411_c0_g1_i2	calmodulin 150	183	441.699
TRINITY_DN6689_c0_g1_i1	glutathione peroxidase 198	184	441.092
TRINITY_DN62082_c1_g1_i2	cytochrome c oxidase subunit 6A2, mitochondrial-like 129	185	433.458
TRINITY_DN67010_c0_g1_i1	---NA---	186	430.012
TRINITY_DN40526_c0_g1_i1	cytochrome c oxidase subunit 5B, mitochondrial-like 164	187	428.212
TRINITY_DN10642_c0_g2_i1	heterogeneous nuclear ribonucleoprotein 87F-like isoform X1 265	188	419.618
TRINITY_DN66746_c3_g1_i2	Pancreatic secretory granule membrane major glycoprotein GP2 344	189	419.453
TRINITY_DN43800_c0_g1_i1	high mobility group-T protein 206	190	415.78
TRINITY_DN68733_c2_g14_i1	---NA---	191	413.022
TRINITY_DN66157_c1_g4_i3	tubulin beta-4B chain-like 240	192	403.02
TRINITY_DN66839_c2_g19_i1	---NA---	193	400.793
TRINITY_DN63580_c0_g3_i5	lipopolysaccharide-induced TNF-alpha factor 134	194	400.517
TRINITY_DN65670_c6_g6_i4	heterogeneous nuclear ribonucleoprotein L-like 595	195	397.811
TRINITY_DN51220_c0_g4_i1	hypothetical protein EGW08_003245	196	396.833
TRINITY_DN57611_c0_g5_i1	---NA---	197	395.543
TRINITY_DN59742_c0_g2_i1	hypothetical protein	198	394.08
TRINITY_DN36251_c0_g1_i1	cytochrome b-c1 complex subunit 7-like 139	199	393.964
TRINITY_DN66889_c1_g1_i1	elongation factor 1-gamma-like 429	200	391.207
TRINITY_DN54557_c2_g1_i1	---NA---	201	390.013
TRINITY_DN67804_c2_g2_i2	---NA---	202	388.648
TRINITY_DN87802_c0_g1_i1	PAS domain-containing serine/threonine-protein kinase 111	203	386.058
TRINITY_DN69005_c11_g23_i1	Acyl-coenzyme A thioesterase 3 217	204	385.326
TRINITY_DN59373_c0_g1_i1	tubulin alpha-1 chain 475	205	383.166
TRINITY_DN65853_c0_g2_i5	macrophage mannose receptor 1-like isoform X1 239	206	377.027
TRINITY_DN65366_c3_g2_i3	PREDICTED: uncharacterized protein LOC106056777	207	373.199
TRINITY_DN67130_c1_g2_i12	sushi, von Willebrand factor type A, EGF and pentraxin domain-containing protein 1-like 186	208	367.631
TRINITY_DN25854_c0_g1_i2	---NA---	209	366.541
TRINITY_DN24814_c0_g1_i1	probable ribosome biogenesis protein RLP24 165	210	364.679
TRINITY_DN68318_c1_g17_i2	---NA---	211	362.876
TRINITY_DN69060_c0_g1_i1	RNA polymerase II-associated factor 1-like isoform 1 104	212	362.199
TRINITY_DN68589_c4_g2_i3	hnRNPAB-like 2 protein 348	213	360.943
TRINITY_DN48554_c0_g1_i1	CDGSH iron-sulfur domain-containing protein 2 homolog B-like 109	214	357.14
TRINITY_DN63263_c0_g1_i1	cytochrome c oxidase subunit 5A-like protein 182	215	355.524
TRINITY_DN42636_c0_g1_i1	---NA---	216	355.256
TRINITY_DN26817_c0_g1_i2	profilin-like 141	217	353.999
TRINITY_DN21105_c0_g1_i1	mitochondrial ATP synthase B subunit 307	218	352.674
TRINITY_DN62524_c1_g1_i1	cell number regulator 10-like 114	219	351.498
TRINITY_DN66095_c4_g14_i1	group II trans-sialidase superfamily	220	348.907
TRINITY_DN68733_c2_g7_i1	---NA---	221	344.937
TRINITY_DN55125_c1_g1_i1	retinol dehydrogenase 2-like 317	222	338.043
TRINITY_DN59357_c0_g1_i1	cathepsin L 332	223	336.781
TRINITY_DN66886_c6_g3_i2	---NA---	224	333.532
TRINITY_DN65413_c9_g2_i3	uncharacterized protein LOC112562856 129	225	333.388
TRINITY_DN66906_c0_g1_i1	---NA---	226	332.33
TRINITY_DN34849_c0_g1_i1	mitochondrial ATP synthase subunit d precursor 220	227	330.113
TRINITY_DN25026_c0_g1_i1	---NA---	228	329.066
TRINITY_DN68748_c3_g13_i4	hemocyte protein-glutamine gamma-glutamyltransferase-like isoform X2 197	229	327.706
TRINITY_DN66705_c1_g3_i6	tropomyosin 285	230	325.86
TRINITY_DN57986_c0_g1_i2	non-classical arabinogalactan protein 31-like	231	324.682
TRINITY_DN61801_c0_g2_i1	---NA---	232	323.87
TRINITY_DN47002_c0_g1_i1	polynucleotide adenylyltransferase	233	323.638
TRINITY_DN66677_c1_g1_i3	DUF4190 domain-containing protein	234	322.753
TRINITY_DN12436_c0_g1_i1	adenylate kinase 2, mitochondrial-like 236	235	321.386
TRINITY_DN66667_c4_g1_i5	dipeptidase 1-like isoform X1 460	236	320.962
TRINITY_DN65844_c0_g2_i1	Glyceraldehyde-3-phosphate dehydrogenase 336	237	320.737
TRINITY_DN60385_c0_g2_i1	mitochondrial-processing peptidase subunit beta-like 153	238	319.33
TRINITY_DN68376_c0_g7_i1	mannan-binding lectin serine protease 1 isoform X2	239	318.303
TRINITY_DN24574_c0_g3_i2	fatty acid-binding protein, adipocyte-like 131	240	316.513
TRINITY_DN66656_c1_g6_i1	cytochrome c oxidase subunit IV 227	241	316.23
TRINITY_DN67433_c0_g2_i2	---NA---	242	316.021
TRINITY_DN12364_c0_g1_i1	RecName: Full=Cytochrome c 110	243	314.806
TRINITY_DN18445_c0_g1_i1	mitochondrial ATP synthase subunit OSCP-like precursor 219	244	313.202
TRINITY_DN1452_c0_g2_i2	---NA---	245	312.895
TRINITY_DN68277_c2_g2_i1	coiled-coil-helix-coiled-coil-helix domain-containing protein 10 mitochondrial 140	246	312.329
TRINITY_DN61104_c0_g3_i3	uncharacterized protein LOC111136604 190	247	311.657
TRINITY_DN67445_c5_g3_i2	ganglioside GM2 activator 184	248	311.642
TRINITY_DN57193_c0_g1_i1	calreticulin precursor 413	249	308.671
TRINITY_DN66857_c0_g1_i1	cathepsin L 347	250	304.298
TRINITY_DN67541_c7_g2_i1	high mobility group-T protein-like 144	251	297.49
TRINITY_DN69005_c11_g30_i1	Transposable element Tc1 transposase 110	252	293.962
TRINITY_DN48595_c0_g1_i2	myophilin-like 193	253	292.708
TRINITY_DN64475_c0_g1_i1	phosphate carrier protein, mitochondrial-like 338	254	291.343
TRINITY_DN36473_c0_g2_i2	eukaryotic translation initiation factor 3 subunit I-like 326	255	290.055
TRINITY_DN68612_c3_g6_i1	---NA---	256	288.902
TRINITY_DN52660_c1_g1_i1	protein PML	257	286.501
TRINITY_DN68439_c0_g14_i1	uncharacterized protein LOC110463708 194	258	285.725
TRINITY_DN1972_c0_g1_i1	histone H2A	259	284.075
TRINITY_DN59986_c0_g2_i1	---NA---	260	283.992
TRINITY_DN11678_c0_g1_i1	Tubulin alpha chain 112	261	283.019
TRINITY_DN56778_c0_g1_i1	prefoldin subunit 1-like 129	262	281.403
TRINITY_DN32536_c0_g1_i1	ATP synthase subunit gamma, mitochondrial-like 305	263	280.153
TRINITY_DN68727_c2_g2_i7	---NA---	264	279.239
TRINITY_DN65428_c3_g1_i1	---NA---	265	278.073
TRINITY_DN62220_c4_g1_i3	plasminogen activator inhibitor 1 RNA-binding protein-like isoform X3 397	266	275.166
TRINITY_DN77329_c0_g1_i1	NADH-dehydrogenase, putative	267	270.805
TRINITY_DN67810_c0_g1_i3	peptidyl-prolyl cis-trans isomerase 126	268	270.676
TRINITY_DN66203_c0_g2_i4	interferon alpha-inducible protein 27-like protein 2B 168	269	267.131
TRINITY_DN61087_c1_g1_i1	hypothetical protein EMIHUDRAFT_453585 796	270	266.379
TRINITY_DN65336_c0_g5_i3	60S ribosomal protein L28-like 144	271	266.258
TRINITY_DN56585_c0_g1_i1	hypothetical protein CGI_10028476	272	265.864
TRINITY_DN68834_c8_g12_i1	---NA---	273	264.417
TRINITY_DN68895_c1_g2_i1	MAM and LDL-receptor class A domain-containing protein 2-like 125	274	263.02
TRINITY_DN68550_c0_g1_i2	---NA---	275	262.908
TRINITY_DN67255_c0_g1_i1	cytochrome b-c1 complex subunit 2, mitochondrial-like isoform X3 456	276	262.849
TRINITY_DN67041_c0_g2_i3	---NA---	277	261.838
TRINITY_DN66361_c0_g2_i1	placenta-specific gene 8 protein-like 186	278	260.145
TRINITY_DN27465_c0_g1_i1	uncharacterized protein LOC112075409	279	260.012
TRINITY_DN356_c0_g1_i1	---NA---	280	259.9
TRINITY_DN65411_c0_g4_i1	calmodulin isoform X1 142	281	259.732
TRINITY_DN60769_c1_g1_i4	succinate dehydrogenase cytochrome b560 subunit, mitochondrial-like 179	282	256.073
TRINITY_DN52564_c0_g1_i1	eukaryotic translation initiation factor 3 subunit H-like 335	283	255.009
TRINITY_DN66930_c1_g1_i6	bactericidal/permeability-increasing protein 2 497	284	254.996
TRINITY_DN68896_c4_g22_i1	hypothetical protein BSL78_29151 156	285	253.674
TRINITY_DN66070_c0_g1_i1	myosin-2 essential light chain-like 148	286	248.033
TRINITY_DN35988_c0_g2_i1	---NA---	287	248.028
TRINITY_DN71379_c0_g1_i1	C-Maf-inducing protein 136	288	245.574
TRINITY_DN66644_c0_g4_i1	CDK5 regulatory subunit-associated protein 3 198	289	244.503
TRINITY_DN65366_c3_g1_i2	predicted protein	290	243.328
TRINITY_DN56629_c0_g1_i1	---NA---	291	242.649
TRINITY_DN68511_c0_g12_i2	---NA---	292	242.562
TRINITY_DN68459_c1_g17_i2	protein shisa-5-like	293	240.79
TRINITY_DN61036_c0_g1_i1	Nitric oxide synthase	294	240.512
TRINITY_DN68311_c0_g3_i1	---NA---	295	237.832
TRINITY_DN63529_c0_g4_i6	probable ATP-dependent RNA helicase DDX5 isoform X1 444	296	237.579
TRINITY_DN27345_c0_g2_i1	Cyclic GMP-AMP synthase 100	297	237.33
TRINITY_DN64636_c0_g1_i3	cystatin B 101	298	236.582
TRINITY_DN63249_c1_g1_i2	---NA---	299	235.666
TRINITY_DN62547_c1_g1_i1	tyrosine-protein kinase SRK2 520	300	235.132
TRINITY_DN67817_c3_g3_i1	---NA---	301	234.298
TRINITY_DN68514_c0_g1_i2	laccase-3 isoform X2 689	302	232.221
TRINITY_DN24222_c0_g1_i1	60S ribosomal protein L13 181	303	230.951
TRINITY_DN38975_c0_g2_i2	---NA---	304	230.733
TRINITY_DN53358_c0_g1_i2	eukaryotic translation initiation factor 3 subunit E-like 391	305	228.941
TRINITY_DN66744_c0_g1_i2	eukaryotic initiation factor 4A-I-like 416	306	228.096
TRINITY_DN66221_c3_g1_i2	Peptidyl-prolyl cis-trans isomerase 165	307	227.826
TRINITY_DN67978_c0_g4_i5	shell protein-4 548	308	226.153
TRINITY_DN67593_c3_g8_i1	uncharacterized protein LOC110455974 222	309	224.967
TRINITY_DN66460_c5_g1_i1	---NA---	310	223.233
TRINITY_DN60385_c0_g1_i1	mitochondrial-processing peptidase subunit beta-like 342	311	222.024
TRINITY_DN66971_c0_g1_i1	---NA---	312	221.491
TRINITY_DN66808_c1_g1_i1	ribosome biogenesis protein NSA2 homolog 261	313	221.453
TRINITY_DN54353_c0_g1_i1	voltage-dependent anion channel 2-like protein 283	314	221.377
TRINITY_DN67703_c0_g7_i1	---NA---	315	221.266
TRINITY_DN64795_c0_g2_i1	cytochrome b-c1 complex subunit Rieske, mitochondrial-like 283	316	220.969
TRINITY_DN67420_c0_g1_i3	nidogen-2 195	317	220.961
TRINITY_DN5673_c1_g2_i1	---NA---	318	220.597
TRINITY_DN65603_c3_g1_i2	selenium binding protein 493	319	219.549
TRINITY_DN68858_c1_g6_i1	PREDICTED: uncharacterized protein LOC103278197	320	218.885
TRINITY_DN65797_c10_g1_i3	sodium-dependent phosphate transport protein 2B-like 615	321	217.14
TRINITY_DN35988_c0_g1_i1	---NA---	322	215.6
TRINITY_DN68654_c13_g1_i1	AGAP004616-PA 120	323	214.449
TRINITY_DN64217_c0_g1_i4	ras-like GTP-binding protein Rho1 228	324	213.419
TRINITY_DN1532_c0_g1_i1	---NA---	325	212.874
TRINITY_DN47081_c2_g2_i1	---NA---	326	212.11
TRINITY_DN47590_c1_g1_i1	---NA---	327	211.147
TRINITY_DN48346_c0_g1_i1	caltractin 142	328	209.084
TRINITY_DN34460_c0_g1_i1	small nuclear ribonucleoprotein Sm D2 120	329	208.944
TRINITY_DN21771_c0_g1_i1	---NA---	330	208.635
TRINITY_DN71169_c0_g1_i1	ATP synthase subunit delta, mitochondrial-like 180	331	208.251
TRINITY_DN65536_c2_g2_i1	---NA---	332	207.339
TRINITY_DN67038_c0_g2_i2	response regulator	333	207.316
TRINITY_DN36404_c0_g1_i1	actin-related protein 43526 complex subunit 3-like 184	334	205.53
TRINITY_DN63497_c0_g1_i1	---NA---	335	205.493
TRINITY_DN118332_c0_g1_i1	tubulin alpha-1 chain 101	336	204.387
TRINITY_DN68748_c3_g5_i1	protein-glutamine gamma-glutamyltransferase K-like 110	337	204.185
TRINITY_DN52700_c0_g1_i1	---NA---	338	204.009
TRINITY_DN61072_c2_g1_i1	---NA---	339	203.098
TRINITY_DN68622_c0_g5_i2	ras-related C3 botulinum toxin substrate 1 138	340	203
TRINITY_DN63052_c0_g2_i5	Williams-Beuren syndrome chromosomal region 27 protein-like 111	341	202.956
TRINITY_DN64595_c1_g7_i2	---NA---	342	202.884
TRINITY_DN65012_c2_g4_i3	brain protein I3-like 128	343	202.534
TRINITY_DN47426_c0_g1_i2	---NA---	344	202.446
TRINITY_DN61417_c0_g2_i2	---NA---	345	199.982
TRINITY_DN57055_c1_g3_i4	adhesive plaque matrix protein-like isoform X2	346	199.493
TRINITY_DN22387_c0_g1_i1	NADH dehydrogenase [ubiquinone] 1 beta subcomplex subunit 8, mitochondrial-like 195	347	199.379
TRINITY_DN68591_c15_g3_i1	ATPase inhibitor mai-2, mitochondrial-like isoform X1 113	348	199.375
TRINITY_DN68665_c0_g3_i3	proprotein convertase subtilisin/kexin type 5 723	349	198.966
TRINITY_DN52580_c0_g1_i1	pyrroline-5-carboxylate reductase 2-like 281	350	198.236
TRINITY_DN67063_c3_g1_i2	tumor necrosis factor ligand superfamily member 10	351	197.559
TRINITY_DN54356_c0_g2_i1	rho glutathione S-transferase 228	352	196.728
TRINITY_DN10953_c0_g1_i1	---NA---	353	196.203
TRINITY_DN68443_c0_g1_i1	39S ribosomal protein L54, mitochondrial-like 120	354	196.141
TRINITY_DN68466_c2_g10_i6	hypothetical protein BRAFLDRAFT_219763 114	355	195.429
TRINITY_DN66306_c8_g6_i1	peroxidasin homolog 1231	356	195.363
TRINITY_DN52041_c0_g4_i1	---NA---	357	193.833
TRINITY_DN53214_c0_g10_i1	CCR4-NOT transcription complex subunit 1	358	193.402
TRINITY_DN60834_c2_g1_i1	hypothetical protein, partial	359	192.811
TRINITY_DN66571_c0_g9_i1	---NA---	360	192.549
TRINITY_DN65331_c1_g5_i1	---NA---	361	192.217
TRINITY_DN58290_c0_g1_i2	predicted protein	362	191.86
TRINITY_DN53225_c1_g1_i2	60 kDa SS-A/Ro ribonucleoprotein 593	363	191.678
TRINITY_DN63860_c0_g9_i1	---NA---	364	191.009
TRINITY_DN67234_c5_g10_i1	angiopoietin-related protein 6-like 213	365	189.562
TRINITY_DN61072_c1_g1_i1	---NA---	366	189.392
TRINITY_DN67432_c1_g1_i2	placenta-specific gene 8 protein-like 119	367	188.827
TRINITY_DN11035_c0_g1_i1	cytochrome c1, heme protein, mitochondrial-like 272	368	188.701
TRINITY_DN58005_c1_g1_i1	predicted protein 145	369	188.374
TRINITY_DN40058_c0_g2_i2	---NA---	370	188.025
TRINITY_DN67027_c2_g4_i2	MAM and LDL-receptor class A domain-containing protein 1 116	371	187.916
TRINITY_DN68660_c0_g2_i1	---NA---	372	186.266
TRINITY_DN64311_c0_g4_i1	heterogeneous nuclear ribonucleoprotein D-like-B isoform X1 338	373	186.22
TRINITY_DN47658_c0_g1_i1	peflin-like 242	374	184.948
TRINITY_DN38070_c0_g1_i1	PREDICTED: mucin-1-like	375	183.048
TRINITY_DN39152_c0_g4_i3	cold-shock protein CS120-like	376	181.839
TRINITY_DN42639_c0_g2_i1	NADH dehydrogenase [ubiquinone] 1 beta subcomplex subunit 11, mitochondrial-like 166	377	181.68
TRINITY_DN67624_c1_g7_i1	tubulin alpha-3 chain 197	378	180.435
TRINITY_DN43397_c0_g1_i1	---NA---	379	180.432
TRINITY_DN56161_c0_g2_i1	---NA---	380	180.111
TRINITY_DN68393_c3_g3_i3	RNA-directed DNA polymerase from mobile element jockey	381	179.725
TRINITY_DN63438_c0_g2_i1	Kynurenine formamidase 286	382	178.782
TRINITY_DN68096_c6_g1_i1	---NA---	383	178.187
TRINITY_DN68979_c11_g3_i18	hypothetical protein 226	384	177.721
TRINITY_DN68272_c3_g3_i1	---NA---	385	177.22
TRINITY_DN68491_c2_g1_i1	F-box only 2-like protein 397	386	176.725
TRINITY_DN65810_c1_g4_i1	E-selectin-like isoform X2	387	176.153
TRINITY_DN66571_c0_g3_i1	---NA---	388	175.572
TRINITY_DN56604_c0_g2_i4	---NA---	389	175.488
TRINITY_DN68511_c0_g2_i8	---NA---	390	175.424
TRINITY_DN66915_c1_g2_i2	---NA---	391	175.305
TRINITY_DN34802_c0_g1_i1	hypothetical protein LOTGIDRAFT_132049, partial	392	172.799
TRINITY_DN61696_c0_g1_i7	heterogeneous nuclear ribonucleoprotein K-like isoform X7 135	393	172.765
TRINITY_DN60667_c2_g1_i3	DNA-binding protein HEXBP-like isoform X2	394	171.904
TRINITY_DN24507_c0_g1_i2	protein PLANT CADMIUM RESISTANCE 3 111	395	171.893
TRINITY_DN64458_c0_g7_i1	---NA---	396	171.304
TRINITY_DN66203_c0_g3_i1	interferon alpha-inducible protein 27-like protein 2B isoform X1 168	397	170.685
TRINITY_DN25796_c0_g1_i1	glutathione S-transferase 212	398	170.44
TRINITY_DN44310_c0_g1_i1	histidine triad nucleotide-binding protein 1 133	399	168.231
TRINITY_DN42265_c0_g1_i1	tight junction-associated protein 1-like isoform X2 300	400	168.11
TRINITY_DN68915_c5_g18_i1	Williams-Beuren syndrome chromosomal region 27 protein-like isoform X1 124	401	167.974
TRINITY_DN58786_c0_g3_i1	proteasome maturation protein 147	402	166.912
TRINITY_DN47855_c0_g1_i1	S-adenosylmethionine synthase-like 413	403	166.889
TRINITY_DN68430_c2_g4_i3	Wiskott-Aldrich syndrome protein 119	404	166.535
TRINITY_DN66738_c8_g1_i2	annexin A4-like isoform X1 320	405	166.419
TRINITY_DN27192_c0_g2_i1	---NA---	406	166.378
TRINITY_DN58454_c1_g1_i1	Microtubule-associated serine/threonine-protein kinase-like protein 154	407	165.82
TRINITY_DN67134_c1_g7_i1	---NA---	408	164.941
TRINITY_DN67550_c1_g1_i2	cinnamyl alcohol dehydrogenase 8-like isoform X2 148	409	164.614
TRINITY_DN68144_c2_g17_i1	---NA---	410	164.339
TRINITY_DN27214_c0_g1_i1	pterin-4-alpha-carbinolamine dehydratase-like 142	411	162.64
TRINITY_DN60521_c0_g4_i1	phosphoenolpyruvate carboxykinase, cytosolic [GTP] isoform X1 509	412	160.471
TRINITY_DN51828_c0_g1_i1	protein tweety homolog 1-like isoform X2 126	413	159.417
TRINITY_DN66249_c0_g4_i2	17-beta-hydroxysteroid dehydrogenase 14-like 267	414	158.946
TRINITY_DN65959_c15_g19_i1	---NA---	415	157.886
TRINITY_DN68984_c13_g1_i2	von Willebrand factor D and EGF domain-containing protein-like	416	157.256
TRINITY_DN68048_c3_g4_i2	fibrinogen C domain-containing protein 1-like isoform X1 161	417	157.047
TRINITY_DN57402_c0_g1_i2	hypothetical protein EGW08_000752 220	418	156.738
TRINITY_DN62665_c1_g3_i4	transgelin-3 isoform X2 168	419	156.412
TRINITY_DN67377_c0_g1_i4	phosphoethanolamine N-methyltransferase 3 isoform X1 363	420	155.961
TRINITY_DN64810_c0_g1_i1	NADH dehydrogenase [ubiquinone] 1 alpha subcomplex subunit 8-like 174	421	155.62
TRINITY_DN7759_c0_g1_i1	enolase-like 438	422	155.604
TRINITY_DN65095_c0_g7_i1	hypothetical protein	423	155.576
TRINITY_DN66114_c3_g1_i1	peptidyl-prolyl cis-trans isomerase B-like 210	424	155.25
TRINITY_DN51174_c0_g2_i1	probable 18S rRNA (guanine-N(7))-methyltransferase isoform X1 145	425	155.056
TRINITY_DN56870_c0_g1_i1	ER membrane protein complex subunit 4-like 182	426	155
TRINITY_DN68593_c6_g22_i9	---NA---	427	154.845
TRINITY_DN52342_c1_g2_i1	---NA---	428	154.714
TRINITY_DN65021_c10_g5_i1	NADH dehydrogenase [ubiquinone] 1 beta subcomplex subunit 5, mitochondrial-like 194	429	154.582
TRINITY_DN67169_c5_g11_i6	Low-density lipoprotein receptor-related protein 6 1108	430	154.43
TRINITY_DN34080_c0_g2_i1	---NA---	431	154.351
TRINITY_DN63001_c0_g1_i1	Protein yellow 448	432	153.326
TRINITY_DN63731_c0_g1_i1	calmodulin-like 147	433	153.175
TRINITY_DN68961_c12_g1_i1	hypothetical protein BSL78_25062	434	153.151
TRINITY_DN68678_c0_g6_i6	---NA---	435	152.311
TRINITY_DN67299_c1_g8_i1	sodium-dependent proline transporter-like 649	436	151.219
TRINITY_DN66781_c1_g1_i1	uncharacterized protein LOC110447600 377	437	150.351
TRINITY_DN68162_c6_g2_i5	Menaquinone biosynthesis methyltransferase ubiE 308	438	150.314
TRINITY_DN46145_c0_g1_i1	superoxide dismutase (cu-zn) 193	439	150.16
TRINITY_DN68249_c1_g2_i1	uncharacterized protein LOC105920141 112	440	149.522
TRINITY_DN57165_c0_g1_i2	---NA---	441	149.256
TRINITY_DN58035_c0_g1_i1	metallo-hydrolase/oxidoreductase, putative	442	148.823
TRINITY_DN68550_c0_g5_i7	---NA---	443	148.624
TRINITY_DN67360_c4_g1_i8	aromatic-L-amino-acid decarboxylase-like 481	444	148.429
TRINITY_DN68963_c0_g5_i1	Transposon Ty3-G Gag-Pol polyprotein 117	445	148.224
TRINITY_DN66552_c1_g1_i2	---NA---	446	148.086
TRINITY_DN20466_c0_g1_i1	transmembrane protein 180-like 120	447	147.905
TRINITY_DN68221_c0_g1_i1	hypothetical protein CAPTEDRAFT_130267, partial	448	147.096
TRINITY_DN67367_c0_g1_i1	prosaposin-like isoform X1 153	449	147.081
TRINITY_DN68748_c3_g9_i1	protein-glutamine gamma-glutamyltransferase K-like 159	450	146.401
TRINITY_DN68670_c0_g6_i3	---NA---	451	146.335
TRINITY_DN54273_c0_g1_i1	---NA---	452	146.238
TRINITY_DN66502_c3_g1_i3	SPRY domain-containing protein 3-like isoform X1 186	453	145.819
TRINITY_DN113406_c0_g1_i1	transcription initiation factor TFIID subunit 10-like isoform X1 139	454	145.527
TRINITY_DN45019_c0_g1_i1	Transcription elongation factor B polypeptide 2 121	455	145.042
TRINITY_DN44292_c0_g1_i1	NADH dehydrogenase [ubiquinone] 1 beta subcomplex subunit 9-like 158	456	144.74
TRINITY_DN68834_c8_g18_i2	---NA---	457	144.708
TRINITY_DN67897_c18_g7_i2	---NA---	458	144.259
TRINITY_DN66602_c6_g1_i5	---NA---	459	144.256
TRINITY_DN15268_c0_g2_i1	hypothetical protein LOTGIDRAFT_229613	460	143.99
TRINITY_DN68733_c2_g2_i1	---NA---	461	143.928
TRINITY_DN22485_c0_g1_i1	PREDICTED: uncharacterized protein LOC105850830	462	143.92
TRINITY_DN63285_c0_g1_i1	deferrochelatase/peroxidase YfeX 388	463	142.793
TRINITY_DN10808_c0_g1_i1	uncharacterized protein LOC112572464 151	464	142.227
TRINITY_DN67814_c4_g1_i1	---NA---	465	139.949
TRINITY_DN64486_c2_g4_i4	---NA---	466	139.712
TRINITY_DN47640_c1_g1_i2	uncharacterized protein LOC111636110 242	467	139.695
TRINITY_DN64152_c0_g1_i7	---NA---	468	139.366
TRINITY_DN48848_c0_g1_i1	---NA---	469	139.175
TRINITY_DN65819_c0_g2_i3	---NA---	470	138.807
TRINITY_DN95148_c0_g1_i1	RNA-binding protein PNO1 266	471	138.735
TRINITY_DN39657_c0_g1_i4	EF-hand calcium-binding domain-containing protein 6-like isoform X3 163	472	138.645
TRINITY_DN68275_c5_g10_i5	---NA---	473	137.994
TRINITY_DN5486_c0_g1_i1	---NA---	474	137.818
TRINITY_DN52028_c0_g1_i1	GPI-anchored carbonic anhydrase 325	475	137.775
TRINITY_DN68048_c3_g8_i6	fibrinogen C domain-containing protein 1-like isoform X1 182	476	137.208
TRINITY_DN65888_c0_g2_i4	xaa-Pro aminopeptidase 1 isoform X2 716	477	137.151
TRINITY_DN67234_c5_g5_i1	angiopoietin-2 isoform X1 106	478	137.092
TRINITY_DN68655_c0_g1_i4	atrial natriuretic peptide-converting enzyme-like 529	479	136.924
TRINITY_DN67937_c2_g1_i2	uncharacterized protein LOC110455930 isoform X2 139	480	136.344
TRINITY_DN60764_c1_g6_i1	---NA---	481	136.296
TRINITY_DN35301_c0_g1_i1	NADH dehydrogenase [ubiquinone] 1 alpha subcomplex subunit 5 118	482	136.264
TRINITY_DN48427_c0_g1_i1	uncharacterized protein LOC110464231 144	483	135.859
TRINITY_DN60417_c2_g4_i1	14-3-3 protein epsilon 261	484	135.776
TRINITY_DN64527_c2_g1_i1	MICOS complex subunit MIC27-like 162	485	135.32
TRINITY_DN66861_c10_g2_i1	GABAA receptor-associated protein 118	486	135.316
TRINITY_DN68719_c1_g10_i1	---NA---	487	135.256
TRINITY_DN66613_c12_g6_i1	hypothetical protein BSL78_12460	488	134.704
TRINITY_DN29444_c0_g1_i1	Universal stress protein in QAH/OAS sulfhydrylase 3'region 153	489	134.672
TRINITY_DN35912_c0_g2_i1	---NA---	490	134.205
TRINITY_DN52054_c0_g1_i1	NADH dehydrogenase [ubiquinone] 1 alpha subcomplex subunit 2-like 100	491	134.158
TRINITY_DN66417_c4_g1_i1	tubulin polymerization-promoting protein family member 2-like isoform X1 224	492	133.285
TRINITY_DN68947_c13_g4_i1	---NA---	493	133.247
TRINITY_DN67967_c16_g3_i1	---NA---	494	132.924
TRINITY_DN66041_c2_g6_i1	SPRY domain-containing protein 3-like	495	132.75
TRINITY_DN6185_c0_g1_i1	RecName: Full=Invertebrate-type lysozyme; AltName: Full=1,4-beta-N-acetylmuramidase; AltName: Full=Destabilase; Flags: Precursor 166	496	132.391
TRINITY_DN75980_c0_g1_i1	uncharacterized protein LOC110459148 303	497	132.147
TRINITY_DN83986_c0_g1_i1	---NA---	498	131.921
TRINITY_DN10102_c0_g1_i1	hypothetical protein GUITHDRAFT_79495, partial	499	131.827
TRINITY_DN63184_c0_g3_i2	---NA---	500	131.805
TRINITY_DN65916_c0_g2_i2	putative ras-related C3 botulinum toxin substrate 1 143	501	130.674
TRINITY_DN68146_c0_g1_i2	gliding motility-associated C-terminal domain-containing protein 481	502	130.574
TRINITY_DN68982_c18_g3_i1	tripartite motif-containing protein 2-like	503	130.542
TRINITY_DN9296_c0_g2_i1	histone H2A-like 135	504	130.411
TRINITY_DN64442_c0_g1_i1	---NA---	505	130.142
TRINITY_DN42551_c0_g1_i1	hypothetical protein CGI_10009205 137	506	129.427
TRINITY_DN68296_c1_g1_i10	sodium- and chloride-dependent neutral and basic amino acid transporter B(0+)-like isoform X3 686	507	128.952
TRINITY_DN44179_c0_g1_i1	---NA---	508	128.879
TRINITY_DN106320_c0_g1_i1	---NA---	509	128.627
TRINITY_DN66390_c8_g1_i1	---NA---	510	127.653
TRINITY_DN4683_c0_g1_i1	COX assembly mitochondrial protein homolog 148	511	127.441
TRINITY_DN63410_c4_g1_i4	heterogeneous nuclear ribonucleoprotein K-like isoform X3 274	512	127.295
TRINITY_DN52536_c0_g1_i1	putative succinate dehydrogenase [ubiquinone] cytochrome b small subunit, mitochondrial 176	513	126.956
TRINITY_DN57826_c1_g1_i1	eukaryotic translation initiation factor 5A-1-like 155	514	126.733
TRINITY_DN67434_c1_g1_i2	Tyrosine-protein phosphatase non-receptor type 6 538	515	126.489
TRINITY_DN68857_c16_g4_i1	Tripartite motif-containing protein 47	516	126.402
TRINITY_DN72698_c0_g1_i1	---NA---	517	125.783
TRINITY_DN34137_c0_g2_i1	---NA---	518	125.639
TRINITY_DN68593_c6_g13_i1	---NA---	519	125.517
TRINITY_DN66399_c1_g3_i1	predicted protein 166	520	125.36
TRINITY_DN51343_c0_g3_i2	hypothetical protein	521	124.959
TRINITY_DN54718_c0_g1_i1	---NA---	522	124.711
TRINITY_DN60271_c0_g1_i3	paramyosin-like 860	523	124.614
TRINITY_DN65487_c0_g1_i2	---NA---	524	124.499
TRINITY_DN96577_c0_g1_i1	transmembrane protein 128-like isoform X2 192	525	124.449
TRINITY_DN32538_c0_g2_i1	---NA---	526	124.391
TRINITY_DN49113_c0_g2_i1	---NA---	527	124.149
TRINITY_DN45359_c0_g1_i1	---NA---	528	124.039
TRINITY_DN62889_c0_g1_i1	mRNA decay activator protein ZFP36L2-A-like 415	529	123.618
TRINITY_DN61948_c0_g1_i3	cell protein CPr2 155	530	123.528
TRINITY_DN53851_c0_g3_i2	---NA---	531	122.987
TRINITY_DN24123_c0_g1_i1	NADH dehydrogenase [ubiquinone] 1 alpha subcomplex subunit 6-like 127	532	122.978
TRINITY_DN68488_c2_g15_i1	---NA---	533	122.892
TRINITY_DN60551_c1_g1_i1	regucalcin 246	534	122.852
TRINITY_DN64119_c2_g3_i1	---NA---	535	122.764
TRINITY_DN68901_c6_g2_i1	receptor-type tyrosine-protein phosphatase T-like 104	536	122.628
TRINITY_DN11198_c0_g1_i1	beta-tubulin 127	537	122.071
TRINITY_DN1452_c0_g1_i1	---NA---	538	122.044
TRINITY_DN48557_c0_g1_i1	protein QIL1-like 106	539	120.727
TRINITY_DN68511_c0_g3_i1	---NA---	540	120.399
TRINITY_DN65663_c2_g1_i1	Urease accessory protein UreD 323	541	120.208
TRINITY_DN116068_c0_g1_i1	---NA---	542	119.938
TRINITY_DN61348_c0_g1_i1	---NA---	543	119.678
TRINITY_DN42041_c0_g1_i1	electron transfer flavoprotein subunit alpha, mitochondrial-like 337	544	119.584
TRINITY_DN57404_c0_g1_i1	selenide, water dikinase-like 320	545	119.229
TRINITY_DN5819_c0_g1_i1	mapk-regulated corepressor-interacting protein 1-like 147	546	119.195
TRINITY_DN66814_c1_g1_i4	---NA---	547	119.178
TRINITY_DN68334_c0_g5_i1	PREDICTED: uncharacterized protein LOC106011052 149	548	119.167
TRINITY_DN68696_c2_g3_i1	pre-mRNA-splicing factor 38A-like 130	549	118.508
TRINITY_DN27507_c0_g1_i1	succinate--CoA ligase [ADP/GDP-forming] subunit alpha, mitochondrial-like isoform X2 324	550	118.329
TRINITY_DN67940_c18_g14_i1	---NA---	551	118.199
TRINITY_DN67831_c0_g4_i1	MAM and LDL-receptor class A domain-containing protein 1-like 170	552	117.96
TRINITY_DN66598_c16_g19_i1	aprataxin 208	553	117.453
TRINITY_DN52700_c1_g3_i1	Cathepsin F 319	554	117.433
TRINITY_DN68879_c0_g8_i1	---NA---	555	117.219
TRINITY_DN66256_c1_g2_i2	lipopolysaccharide-induced TNF-alpha factor 138	556	117.086
TRINITY_DN44964_c0_g1_i1	helicase SKI2W-like 107	557	117.022
TRINITY_DN66157_c1_g1_i1	tubulin beta chain-like 123	558	116.966
TRINITY_DN64973_c0_g3_i2	cytoplasmic aconitate hydratase isoform X1 959	559	116.889
TRINITY_DN59770_c0_g1_i2	TAR DNA-binding protein 43-like isoform X5 279	560	116.672
TRINITY_DN59298_c0_g1_i2	taurocyamine kinase-like 358	561	116.606
TRINITY_DN41966_c0_g1_i1	CCAAT/enhancer-binding protein beta 273	562	116.539
TRINITY_DN59667_c2_g1_i2	uncharacterized protein LOC110445831 149	563	116.515
TRINITY_DN68466_c2_g7_i1	---NA---	564	116.318
TRINITY_DN57562_c0_g1_i1	NADH dehydrogenase [ubiquinone] 1 beta subcomplex subunit 7-like 163	565	116.226
TRINITY_DN68489_c2_g4_i17	hypothetical protein CAPTEDRAFT_229063 193	566	115.947
TRINITY_DN42435_c0_g2_i1	---NA---	567	115.827
TRINITY_DN66420_c9_g12_i2	Alpha-L-fucosidase 461	568	115.454
TRINITY_DN59989_c0_g1_i2	3-hydroxyacyl-CoA dehydrogenase type-2-like 260	569	115.419
TRINITY_DN66321_c2_g6_i1	hypothetical protein SARC_10865, partial	570	115.345
TRINITY_DN67745_c0_g1_i3	HEAT repeat-containing protein 6-like 191	571	115.287
TRINITY_DN67859_c0_g3_i2	histone 1	572	115.154
TRINITY_DN95196_c0_g1_i1	fructose-bisphosphate aldolase-like 250	573	114.825
TRINITY_DN2783_c0_g1_i1	sorting nexin-13-like isoform X2 102	574	114.737
TRINITY_DN67166_c3_g1_i2	---NA---	575	114.526
TRINITY_DN65967_c1_g1_i1	---NA---	576	114.047
TRINITY_DN64978_c0_g2_i3	70 kDa neurofilament protein-like isoform X2 687	577	113.973
TRINITY_DN44140_c0_g2_i1	---NA---	578	113.911
TRINITY_DN79126_c0_g1_i1	Protein BTG1 194	579	113.587
TRINITY_DN61072_c0_g2_i1	acyl carrier protein, mitochondrial-like isoform X3 154	580	113.564
TRINITY_DN62931_c3_g1_i1	NADH:ubiquinone oxidoreductase, NDUFB6/B17 subunit 215	581	113.475
TRINITY_DN65810_c1_g7_i1	sushi, von Willebrand factor type A, EGF and pentraxin domain-containing protein 1-like 118	582	113.438
TRINITY_DN49907_c0_g1_i1	X-box-binding protein 1 453	583	113.343
TRINITY_DN67716_c0_g3_i2	---NA---	584	113.171
TRINITY_DN65683_c4_g2_i1	---NA---	585	112.936
TRINITY_DN4181_c0_g1_i1	Growth arrest and DNA damage-inducible protein GADD45 beta 114	586	112.545
TRINITY_DN67146_c0_g2_i2	cAMP response element binding protein 368	587	112.542
TRINITY_DN63_c0_g1_i1	---NA---	588	112.302
TRINITY_DN68911_c8_g10_i1	---NA---	589	112.282
TRINITY_DN65407_c12_g2_i1	hypothetical protein KP79_PYT00380	590	112.23
TRINITY_DN46177_c0_g1_i2	---NA---	591	112.165
TRINITY_DN117055_c0_g1_i1	---NA---	592	111.968
TRINITY_DN60472_c0_g1_i1	prostate stem cell antigen-like 144	593	111.55
TRINITY_DN68981_c3_g2_i2	hypothetical protein 346	594	111.489
TRINITY_DN58811_c0_g1_i1	---NA---	595	111.178
TRINITY_DN56604_c0_g1_i1	uncharacterized protein LOC110461720 155	596	111.144
TRINITY_DN63788_c1_g2_i1	xaa-Pro aminopeptidase 1-like isoform X2 706	597	111.14
TRINITY_DN96194_c0_g1_i1	---NA---	598	111.093
TRINITY_DN67421_c8_g1_i2	putative peptidyl-prolyl cis-trans isomerase dodo 155	599	110.077
TRINITY_DN65531_c4_g1_i1	transketolase-like 628	600	109.974
TRINITY_DN68879_c0_g15_i1	---NA---	601	109.906
TRINITY_DN37049_c0_g1_i2	uncharacterized protein LOC112572254 139	602	109.878
TRINITY_DN67613_c4_g5_i4	Zinc finger BED domain-containing protein 4 135	603	109.589
TRINITY_DN44442_c0_g1_i1	defender against apopototic cell death 1 114	604	109.397
TRINITY_DN31923_c0_g1_i1	mitochondrial pyruvate carrier 2-like 125	605	109.235
TRINITY_DN9797_c0_g2_i1	leydig cell tumor 10 kDa protein homolog 123	606	109.062
TRINITY_DN17985_c0_g1_i1	---NA---	607	108.952
TRINITY_DN55773_c0_g1_i2	putative sodium-driven chloride bicarbonate exchanger 1031	608	108.858
TRINITY_DN14867_c0_g1_i1	neprilysin-4-like 126	609	108.364
TRINITY_DN42248_c1_g1_i1	---NA---	610	108.299
TRINITY_DN68461_c0_g3_i3	Cytoplasmic dynein 1 heavy chain 1 121	611	108.242
TRINITY_DN61092_c0_g2_i1	RecName: Full=Myosin regulatory light chain, smooth muscle 166	612	108.027
TRINITY_DN68748_c3_g6_i1	hemocyte protein-glutamine gamma-glutamyltransferase-like isoform X2 156	613	107.72
TRINITY_DN65066_c0_g2_i1	Transcription elongation factor spt5	614	107.565
TRINITY_DN14518_c0_g1_i1	transmembrane emp24 domain-containing protein 1-like 222	615	107.462
TRINITY_DN65766_c4_g1_i1	glutathione S-transferase 212	616	107.276
TRINITY_DN67951_c0_g1_i4	filamin-C-like isoform X14 241	617	107.26
TRINITY_DN63348_c0_g1_i1	neutral and basic amino acid transport protein rBAT-like isoform X2 689	618	107.013
TRINITY_DN59166_c0_g1_i1	peroxiredoxin V 191	619	106.988
TRINITY_DN68991_c5_g1_i2	multidrug resistance protein 1-like 135	620	106.852
TRINITY_DN60634_c0_g1_i1	NADH dehydrogenase [ubiquinone] iron-sulfur protein 6, mitochondrial-like 153	621	106.816
TRINITY_DN32374_c0_g1_i1	eukaryotic translation initiation factor 3 subunit F-like 278	622	106.769
TRINITY_DN68978_c7_g18_i1	---NA---	623	106.709
TRINITY_DN67832_c0_g1_i7	hypothetical protein BRAFLDRAFT_65431 316	624	106.685
TRINITY_DN68961_c12_g23_i5	NACHT, LRR and PYD domains-containing protein 3-like isoform X1 246	625	106.657
TRINITY_DN71463_c0_g1_i1	actin-related protein 43526 complex subunit 5-like 150	626	106.364
TRINITY_DN66400_c1_g3_i3	uncharacterized protein LOC112568058 392	627	106.275
TRINITY_DN68990_c16_g8_i1	---NA---	628	105.262
TRINITY_DN39235_c0_g2_i1	AGAP000962-PA-like protein 227	629	105.25
TRINITY_DN68654_c19_g3_i1	---NA---	630	105.073
TRINITY_DN53518_c0_g4_i1	---NA---	631	104.975
TRINITY_DN21200_c0_g1_i1	acyl-CoA desaturase isoform X1 348	632	104.971
TRINITY_DN54291_c0_g1_i1	myosin regulatory light polypeptide 9 173	633	104.75
TRINITY_DN53620_c1_g1_i4	Muscle-specific protein 20 203	634	104.508
TRINITY_DN62009_c0_g1_i1	methyltransferase-like protein 27 isoform X1 226	635	104.269
TRINITY_DN62124_c0_g1_i2	coactosin-like protein 143	636	103.842
TRINITY_DN42286_c0_g1_i1	DUF1566 domain-containing protein	637	103.819
TRINITY_DN53008_c0_g1_i1	PREDICTED: uncharacterized protein LOC101852965	638	103.503
TRINITY_DN68406_c0_g5_i1	PREDICTED: uncharacterized protein LOC105341301	639	103.437
TRINITY_DN58776_c1_g3_i1	Collagen alpha-2(IV) chain	640	103.265
TRINITY_DN62840_c2_g1_i1	major vault protein-like 860	641	102.554
TRINITY_DN89532_c0_g1_i1	---NA---	642	102.007
TRINITY_DN56020_c0_g1_i5	splicing factor U2AF 35 kDa subunit-like 232	643	101.855
TRINITY_DN63666_c0_g1_i1	---NA---	644	101.843
TRINITY_DN27388_c0_g1_i1	PREDICTED: uncharacterized protein LOC101846269	645	101.836
TRINITY_DN10805_c0_g1_i1	---NA---	646	101.813
TRINITY_DN64669_c2_g2_i1	NADH dehydrogenase [ubiquinone] iron-sulfur protein 4, mitochondrial isoform X2 170	647	101.506
TRINITY_DN68389_c6_g12_i3	cathepsin B 341	648	101.473
TRINITY_DN64458_c0_g3_i2	heterogeneous nuclear ribonucleoprotein H2-like 476	649	101.103
TRINITY_DN65936_c0_g3_i1	HRAS-like suppressor 2 173	650	100.803
TRINITY_DN63256_c0_g1_i1	cathepsin L 352	651	100.714
TRINITY_DN68061_c0_g1_i2	cathepsin L 363	652	100.678
TRINITY_DN66656_c1_g7_i1	RNA-binding protein lark-like isoform X1 245	653	100.502
TRINITY_DN65874_c5_g1_i1	37694 protein beta/alpha-1-like 246	654	100.349
TRINITY_DN65945_c3_g4_i1	spliceosome RNA helicase DDX39B 358	655	100.176
TRINITY_DN68711_c1_g5_i2	PREDICTED: uncharacterized protein LOC109617479 191	656	100.143
TRINITY_DN54698_c0_g3_i1	---NA---	657	100.05
TRINITY_DN23022_c0_g1_i1	---NA---	658	100.039
TRINITY_DN66943_c9_g5_i1	tRNA (guanine-N(7)-)-methyltransferase 260	659	99.8854
TRINITY_DN27170_c0_g1_i1	V-type proton ATPase 16 kDa proteolipid subunit 157	660	99.73
TRINITY_DN65253_c0_g5_i6	nucleolin isoform X1 428	661	99.5063
TRINITY_DN25606_c0_g2_i1	DNA-binding protein inhibitor ID-2 116	662	99.3698
TRINITY_DN63268_c0_g1_i1	collagen alpha-2(IV) chain-like	663	99.2201
TRINITY_DN65128_c2_g7_i1	inter-alpha-trypsin inhibitor heavy chain H4 646	664	99.1146
TRINITY_DN58619_c0_g1_i2	6-pyruvoyl tetrahydrobiopterin synthase-like 149	665	99.1115
TRINITY_DN59870_c1_g2_i1	---NA---	666	99.0969
TRINITY_DN76879_c0_g1_i1	phosphoenolpyruvate carboxykinase 197	667	99
TRINITY_DN67899_c4_g1_i1	26S protease regulatory subunit 4 449	668	98.9836
TRINITY_DN66672_c0_g1_i8	cell wall protein PRY3-like isoform X4 194	669	98.9334
TRINITY_DN66169_c0_g1_i1	fructose-1,6-bisphosphatase 1 336	670	98.9014
TRINITY_DN68817_c1_g4_i1	---NA---	671	98.5562
TRINITY_DN57824_c0_g2_i1	---NA---	672	98.1333
TRINITY_DN68146_c0_g2_i1	Low-density lipoprotein receptor-related protein 1B	673	97.9366
TRINITY_DN68069_c2_g1_i1	ETS homologous factor-like isoform X1 426	674	97.8348
TRINITY_DN36490_c0_g1_i1	28S ribosomal protein S23, mitochondrial-like 172	675	97.6982
TRINITY_DN59462_c0_g3_i2	reticulon-4 receptor-like 1	676	97.5806
TRINITY_DN68930_c12_g7_i1	heat shock 70 kDa protein 12A-like isoform X1 113	677	97.5164
TRINITY_DN68580_c2_g10_i3	Exodeoxyribonuclease III 464	678	97.4647
TRINITY_DN62773_c0_g1_i2	prohibitin-2 298	679	97.0679
TRINITY_DN37206_c0_g2_i1	---NA---	680	96.5275
TRINITY_DN68983_c10_g10_i4	Tripartite motif-containing protein 3 117	681	96.5041
TRINITY_DN33346_c0_g1_i1	lysosomal-associated transmembrane protein 4A-like isoform X2 264	682	96.4852
TRINITY_DN31792_c0_g1_i1	prostaglandin E synthase 3 170	683	96.0648
TRINITY_DN104393_c0_g1_i1	SNARE-associated protein Snapin-like 134	684	96.0135
TRINITY_DN68046_c82_g1_i1	actin-related protein 43526 complex subunit 2 isoform X2 299	685	95.7909
TRINITY_DN52385_c0_g1_i1	Acylamino-acid-releasing enzyme	686	95.5026
TRINITY_DN68670_c0_g3_i1	Putative serine/threonine-protein kinase pats1 140	687	95.5023
TRINITY_DN54518_c0_g7_i1	pentapeptide repeat-containing protein	688	95.4898
TRINITY_DN66292_c4_g3_i1	---NA---	689	94.6219
TRINITY_DN59110_c0_g1_i1	RecName: Full=Sarcoplasmic calcium-binding protein 1; AltName: Full=Sarcoplasmic calcium-binding protein I; Short=SCP I 194	690	94.6206
TRINITY_DN70101_c0_g1_i1	---NA---	691	94.5577
TRINITY_DN67410_c2_g2_i4	uncharacterized protein LOC106164030 127	692	94.4982
TRINITY_DN57429_c0_g2_i1	preprotein translocase secy subunit 477	693	94.1597
TRINITY_DN51146_c0_g1_i1	Prohibitin 272	694	93.5323
TRINITY_DN68947_c13_g10_i1	---NA---	695	93.4873
TRINITY_DN68589_c2_g1_i3	---NA---	696	93.4294
TRINITY_DN54148_c1_g1_i1	NHP2-like protein 1 128	697	93.384
TRINITY_DN103401_c0_g1_i1	small nuclear ribonucleoprotein-associated protein B-like 179	698	92.8559
TRINITY_DN26290_c0_g1_i1	1803425Amyosin:SUBUNIT=essential light chain 156	699	92.8442
TRINITY_DN33321_c0_g1_i1	eukaryotic translation initiation factor 1-like 160	700	92.8381
TRINITY_DN66007_c0_g9_i1	---NA---	701	92.7508
TRINITY_DN68970_c6_g8_i1	putative RNA-directed DNA polymerase from transposon BS 99	702	92.6886
TRINITY_DN35860_c0_g2_i1	E3 ubiquitin-protein ligase TRAF7 139	703	92.5913
TRINITY_DN59198_c0_g1_i1	39S ribosomal protein L38, mitochondrial 412	704	92.4858
TRINITY_DN25554_c0_g1_i1	phosphoserine aminotransferase-like 374	705	92.426
TRINITY_DN21157_c0_g3_i1	---NA---	706	92.2417
TRINITY_DN86603_c0_g1_i1	mid1-interacting protein 1-B-like 173	707	92.2337
TRINITY_DN57263_c0_g2_i1	hypothetical protein C7M84_015305	708	91.7957
TRINITY_DN18329_c0_g1_i1	CD63 antigen-like protein A 110	709	91.6356
TRINITY_DN55037_c0_g1_i2	S-adenosylhomocysteine hydrolase-like protein 1 isoform X10 522	710	91.4908
TRINITY_DN48888_c1_g1_i2	Nucleosome assembly protein 1-like 4 395	711	91.3803
TRINITY_DN68716_c0_g11_i1	uncharacterized protein LOC110450516 108	712	91.3174
TRINITY_DN36404_c1_g1_i1	---NA---	713	91.2196
TRINITY_DN68607_c1_g7_i1	pleckstrin homology domain-containing family A member 8-like 101	714	90.8839
TRINITY_DN14331_c0_g1_i1	leucine-rich repeat-containing protein 74B-like 123	715	90.7667
TRINITY_DN59838_c1_g1_i1	histidine-rich glycoprotein-like	716	90.6739
TRINITY_DN66526_c2_g2_i7	uncharacterized protein LOC110463708 391	717	90.6021
TRINITY_DN40385_c0_g2_i1	superoxide dismutase 156	718	90.4533
TRINITY_DN25370_c0_g1_i1	39S ribosomal protein L35, mitochondrial 188	719	90.336
TRINITY_DN80037_c0_g1_i1	cell division cycle protein 123 homolog 137	720	90.2397
TRINITY_DN48397_c0_g2_i1	PPE family protein	721	90.2044
TRINITY_DN41310_c0_g1_i1	activator protein 1 278	722	90.0349
TRINITY_DN80462_c0_g1_i1	calmodulin cam-206 135	723	89.8875
TRINITY_DN55311_c0_g2_i2	---NA---	724	89.7729
TRINITY_DN65244_c1_g8_i1	Retrovirus-related Pol polyprotein from transposon 17	725	89.5586
TRINITY_DN66715_c2_g2_i2	---NA---	726	89.2001
TRINITY_DN63354_c0_g1_i1	malate dehydrogenase, mitochondrial-like isoform X2 362	727	89.1314
TRINITY_DN32236_c0_g2_i1	---NA---	728	89.0041
TRINITY_DN64933_c0_g1_i5	flavin-containing monooxygenase FMO GS-OX-like 2 isoform X1 258	729	88.9272
TRINITY_DN54154_c0_g1_i1	predicted protein	730	88.8911
TRINITY_DN67946_c1_g5_i1	RNA-directed DNA polymerase from transposon BS 126	731	88.8804
TRINITY_DN67469_c0_g2_i9	semaphorin-2A-like 705	732	88.6746
TRINITY_DN28953_c0_g1_i1	---NA---	733	88.6107
TRINITY_DN67029_c5_g1_i1	---NA---	734	88.5569
TRINITY_DN49251_c0_g4_i1	reverse transcriptase-like protein 101	735	88.5193
TRINITY_DN64118_c10_g2_i2	Putative type-1 restriction enzyme specificity protein	736	88.4152
TRINITY_DN68446_c3_g2_i6	interferon-induced protein 44-like isoform X2 251	737	88.3874
TRINITY_DN64611_c0_g1_i2	succinate dehydrogenase [ubiquinone] flavoprotein subunit, mitochondrial-like 667	738	88.1817
TRINITY_DN67917_c0_g7_i1	---NA---	739	88.0137
TRINITY_DN67786_c0_g3_i2	peptidoglycan recognition protein 2 225	740	87.7804
TRINITY_DN66247_c0_g4_i1	---NA---	741	87.4441
TRINITY_DN68914_c0_g7_i1	uncharacterized protein LOC106153310 241	742	86.8842
TRINITY_DN66818_c0_g2_i5	charged multivesicular body protein 7-like 183	743	86.6752
TRINITY_DN68008_c1_g2_i1	hypothetical protein C0Q70_11128 107	744	86.4266
TRINITY_DN67503_c6_g6_i1	ras-related protein Rab-8A-like 126	745	86.4049
TRINITY_DN64796_c1_g1_i1	ceramide synthase 2-like isoform X2 385	746	86.202
TRINITY_DN67773_c1_g4_i3	peptidase M20 domain-containing protein 2-like 399	747	86.1121
TRINITY_DN52794_c0_g1_i1	39S ribosomal protein L28, mitochondrial-like 291	748	86.0769
TRINITY_DN46757_c0_g1_i2	epididymal secretory protein E1-like isoform X1 154	749	85.9442
TRINITY_DN63951_c0_g1_i1	UBA-like domain-containing protein 2-A 150	750	85.6628
TRINITY_DN32566_c0_g1_i1	ribonuclease UK114 139	751	85.5701
TRINITY_DN65355_c1_g1_i2	protein YIPF3-like isoform X2 384	752	85.4826
TRINITY_DN66125_c6_g1_i1	translocon-associated protein subunit delta 176	753	85.2736
TRINITY_DN65660_c0_g1_i1	transmembrane protein 178B 325	754	85.2254
TRINITY_DN66000_c6_g8_i1	---NA---	755	85.1595
TRINITY_DN63744_c0_g1_i1	hypothetical protein XENTR_v90017538mg	756	84.7281
TRINITY_DN62062_c1_g1_i1	---NA---	757	84.6233
TRINITY_DN56310_c0_g3_i1	von Willebrand factor D and EGF domain-containing protein 120	758	84.4649
TRINITY_DN68550_c0_g4_i3	---NA---	759	84.4346
TRINITY_DN33230_c0_g2_i1	reactive oxygen species modulator 1 106	760	84.2698
TRINITY_DN68661_c8_g4_i15	putative electroneutral sodium bicarbonate exchanger 1 1099	761	84.1798
TRINITY_DN66878_c1_g1_i1	tRNA (cytosine(34)-C(5))-methyltransferase-like 706	762	84.0384
TRINITY_DN68355_c0_g5_i1	---NA---	763	83.8592
TRINITY_DN52644_c0_g2_i1	NADH dehydrogenase [ubiquinone] 1 alpha subcomplex subunit 7 119	764	83.7342
TRINITY_DN47073_c0_g1_i1	---NA---	765	83.7115
TRINITY_DN68263_c2_g2_i6	complement receptor type 1-like isoform X2	766	83.6143
TRINITY_DN66644_c0_g1_i3	---NA---	767	83.1832
TRINITY_DN68984_c13_g3_i2	von Willebrand factor D and EGF domain-containing protein 720	768	83.1138
TRINITY_DN68983_c10_g2_i5	tripartite motif-containing protein 2-like 414	769	82.9947
TRINITY_DN68466_c2_g18_i2	---NA---	770	82.9754
TRINITY_DN63203_c1_g1_i1	---NA---	771	82.8311
TRINITY_DN63940_c0_g1_i1	NADH dehydrogenase [ubiquinone] iron-sulfur protein 8, mitochondrial 223	772	82.8173
TRINITY_DN53773_c0_g3_i1	MICOS complex subunit MIC19-like isoform X1 150	773	82.7
TRINITY_DN68997_c1_g1_i2	mucin-4-like isoform X5 1868	774	82.688
TRINITY_DN67115_c1_g1_i3	hypothetical protein BBROOKSOX_353 165	775	82.6605
TRINITY_DN60757_c0_g1_i1	---NA---	776	82.5595
TRINITY_DN21441_c0_g1_i1	predicted protein	777	82.1668
TRINITY_DN68467_c3_g8_i1	RecName: Full=Ribonucleoside-diphosphate reductase small chain; AltName: Full=Ribonucleotide reductase small subunit; AltName: Full=p41 387	778	81.8896
TRINITY_DN66567_c1_g5_i3	myelin expression factor 2-like 353	779	81.8264
TRINITY_DN58193_c0_g2_i1	---NA---	780	81.6256
TRINITY_DN66281_c0_g1_i21	hypothetical protein AM593_03972, partial	781	81.3945
TRINITY_DN68954_c0_g13_i1	PREDICTED: uncharacterized protein LOC102806266, partial	782	81.3081
TRINITY_DN64630_c0_g1_i7	---NA---	783	81.3022
TRINITY_DN51455_c0_g1_i1	NADH-ubiquinone oxidoreductase 20 kDa subunit-like 239	784	81.2251
TRINITY_DN54212_c0_g1_i1	tetraspanin-18-like isoform X1 273	785	81.1252
TRINITY_DN66466_c0_g1_i1	myosin-1-like isoform X4	786	81.0254
TRINITY_DN60901_c0_g1_i1	NADH dehydrogenase [ubiquinone] 1 alpha subcomplex subunit 12-like 137	787	80.8418
TRINITY_DN67899_c1_g2_i1	prefoldin subunit 6 131	788	80.8358
TRINITY_DN68272_c3_g1_i1	uncharacterized protein LOC111104051 292	789	80.765
TRINITY_DN6806_c0_g1_i1	translocon-associated protein subunit gamma 199	790	80.7396
TRINITY_DN42696_c0_g2_i2	---NA---	791	80.5985
TRINITY_DN95271_c0_g1_i1	---NA---	792	80.4639
TRINITY_DN68996_c4_g2_i2	LOW QUALITY PROTEIN: uncharacterized protein LOC111120650 3382	793	80.3034
TRINITY_DN22739_c0_g1_i1	ES1 protein homolog, mitochondrial-like 266	794	80.1929
TRINITY_DN15261_c0_g1_i1	macrophage-expressed gene 1 protein-like 705	795	79.9657
TRINITY_DN66775_c0_g1_i1	sodium/potassium-transporting ATPase 1033	796	79.8112
TRINITY_DN63537_c0_g2_i1	---NA---	797	79.6369
TRINITY_DN56643_c0_g1_i1	---NA---	798	79.2674
TRINITY_DN64069_c1_g3_i1	lysosomal aspartic protease-like isoform X2 381	799	79.1712
TRINITY_DN67574_c0_g3_i1	caspase Dronc 402	800	79.0031
TRINITY_DN66390_c3_g1_i1	---NA---	801	78.9702
TRINITY_DN68156_c1_g1_i12	uncharacterized protein LOC110460606 466	802	78.9029
TRINITY_DN66742_c0_g1_i3	S-phase kinase-associated protein 1 164	803	78.7837
TRINITY_DN68648_c0_g5_i6	interferon-induced protein 44-like isoform X1 464	804	78.782
TRINITY_DN68048_c3_g10_i1	fibrinogen-like protein A isoform X1 151	805	78.6903
TRINITY_DN63650_c1_g2_i1	---NA---	806	78.6736
TRINITY_DN65684_c10_g2_i3	E3 ubiquitin-protein ligase RBX1 105	807	78.6506
TRINITY_DN64905_c0_g2_i2	C-factor 265	808	78.5259
TRINITY_DN2861_c0_g1_i1	39S ribosomal protein L51, mitochondrial-like 185	809	78.5173
TRINITY_DN16054_c0_g1_i1	---NA---	810	78.4489
TRINITY_DN61592_c0_g1_i1	nuclear receptor subfamily 2 group F member 1-A-like isoform X1 446	811	78.4242
TRINITY_DN57008_c0_g1_i2	high affinity copper uptake protein 1-like isoform X4 201	812	78.2411
TRINITY_DN42873_c0_g1_i2	fructose-bisphosphate aldolase-like 161	813	78.21
TRINITY_DN60269_c0_g1_i2	hypothetical protein LOTGIDRAFT_119310	814	78.2065
TRINITY_DN66127_c0_g1_i2	Low-density lipoprotein receptor-related protein 6 1094	815	78.1818
TRINITY_DN68879_c0_g11_i1	---NA---	816	78.1693
TRINITY_DN63215_c0_g1_i4	28S ribosomal protein S33, mitochondrial 117	817	78.1357
TRINITY_DN19933_c0_g1_i1	PREDICTED: uncharacterized protein LOC105345533	818	78.1078
TRINITY_DN58831_c0_g2_i1	small ubiquitin-related modifier 2-like 106	819	78.0982
TRINITY_DN66443_c2_g3_i9	small integral membrane protein 14-like 102	820	77.9782
TRINITY_DN65799_c1_g3_i2	sodium-coupled monocarboxylate transporter 1-like 662	821	77.9614
TRINITY_DN68912_c10_g3_i1	fucolectin-4-like, partial	822	77.9605
TRINITY_DN61072_c0_g1_i1	acyl carrier protein, mitochondrial-like isoform X4 152	823	77.9341
TRINITY_DN54549_c0_g2_i2	---NA---	824	77.8917
TRINITY_DN63403_c0_g1_i2	kynurenine--oxoglutarate transaminase 3-like isoform X1 419	825	77.8165
TRINITY_DN66839_c2_g5_i1	---NA---	826	77.7847
TRINITY_DN63393_c0_g3_i1	probable methylmalonate-semialdehyde dehydrogenase [acylating], mitochondrial 339	827	77.6598
TRINITY_DN65672_c0_g2_i1	innexin unc-9-like isoform X1 359	828	77.5505
TRINITY_DN68430_c2_g1_i3	neural Wiskott-Aldrich syndrome protein isoform X1 208	829	77.444
TRINITY_DN68435_c3_g1_i1	predicted protein	830	77.3083
TRINITY_DN54345_c0_g1_i1	---NA---	831	77.3066
TRINITY_DN60626_c1_g1_i1	claudin-1 precursor	832	77.066
TRINITY_DN67618_c0_g2_i1	---NA---	833	76.9552
TRINITY_DN66973_c1_g8_i4	spectrin beta chain-like 235	834	76.8911
TRINITY_DN61174_c0_g1_i1	NADH dehydrogenase [ubiquinone] 1 alpha subcomplex subunit 9, mitochondrial-like 402	835	76.887
TRINITY_DN34386_c0_g1_i1	---NA---	836	76.7568
TRINITY_DN48035_c1_g1_i1	28S ribosomal protein S14, mitochondrial-like 152	837	76.7262
TRINITY_DN68995_c9_g6_i1	---NA---	838	76.7237
TRINITY_DN57618_c0_g2_i1	uncharacterized protein LOC110442690 235	839	76.5834
TRINITY_DN67717_c1_g9_i4	myosin heavy chain, striated muscle-like isoform X6 1958	840	76.5396
TRINITY_DN67359_c6_g3_i1	---NA---	841	76.3745
TRINITY_DN67802_c1_g1_i2	splicing factor 1-like 127	842	76.31
TRINITY_DN56008_c0_g1_i1	phosphoenolpyruvate carboxykinase, cytosolic [GTP] isoform X1 650	843	76.1409
TRINITY_DN65433_c8_g24_i1	---NA---	844	76.0343
TRINITY_DN50447_c1_g1_i1	---NA---	845	75.9451
TRINITY_DN67449_c1_g9_i4	phylloquinone omega-hydroxylase CYP4F2 503	846	75.9075
TRINITY_DN62834_c0_g1_i1	mitochondrial carnitine/acylcarnitine carrier protein 300	847	75.7353
TRINITY_DN68828_c2_g2_i7	uncharacterized protein LOC111132302 468	848	75.7282
TRINITY_DN68627_c2_g1_i1	1,2-dihydroxy-3-keto-5-methylthiopentene dioxygenase-like 177	849	75.7143
TRINITY_DN30553_c0_g1_i1	---NA---	850	75.5571
TRINITY_DN53339_c0_g4_i1	argininosuccinate synthase-like protein 346	851	75.5522
TRINITY_DN65156_c3_g3_i2	---NA---	852	75.5034
TRINITY_DN68355_c0_g18_i1	---NA---	853	75.4998
TRINITY_DN60138_c1_g2_i1	---NA---	854	75.4649
TRINITY_DN67032_c0_g1_i2	actin-related protein 43526 complex subunit 1A-like 372	855	75.3325
TRINITY_DN4050_c0_g1_i1	eukaryotic translation initiation factor 3 subunit G-like 298	856	75.3187
TRINITY_DN67661_c4_g10_i1	PREDICTED: uncharacterized protein LOC106877732 isoform X7 127	857	75.1483
TRINITY_DN68362_c7_g3_i3	solute carrier family 25 member 38-like isoform X2 284	858	75.0987
TRINITY_DN7031_c0_g1_i1	---NA---	859	74.9059
TRINITY_DN62664_c0_g1_i6	uncharacterized protein CMC5_025040	860	74.9046
TRINITY_DN68739_c0_g3_i13	---NA---	861	74.7078
TRINITY_DN65958_c0_g2_i2	glutathione S-transferase 219	862	74.6252
TRINITY_DN65700_c0_g5_i5	RNA binding protein 163	863	74.6119
TRINITY_DN41299_c0_g3_i1	---NA---	864	74.6048
TRINITY_DN55384_c0_g2_i1	---NA---	865	74.491
TRINITY_DN62762_c0_g1_i1	serine/threonine-protein kinase pim-3-like isoform X1 326	866	74.4123
TRINITY_DN67451_c0_g3_i1	Protocadherin Fat 4 193	867	74.3497
TRINITY_DN11506_c0_g2_i1	---NA---	868	74.2993
TRINITY_DN39064_c0_g1_i1	Interferon-inducible double stranded RNA-dependent protein kinase activator A-like A 326	869	74.2715
TRINITY_DN28853_c0_g1_i1	---NA---	870	74.2576
TRINITY_DN16777_c0_g1_i1	C1q domain-containing protein DC27 239	871	74.205
TRINITY_DN51663_c0_g3_i1	complement component 1 Q subcomponent-binding protein, mitochondrial-like 151	872	74.1936
TRINITY_DN104281_c0_g1_i1	Myelin expression factor 2 149	873	74.1664
TRINITY_DN52828_c0_g1_i5	ADP-sugar pyrophosphatase-like 210	874	73.9703
TRINITY_DN55557_c0_g5_i1	RNA guanine-N7 methyltransferase activating subunit	875	73.9563
TRINITY_DN68577_c2_g10_i1	keratinocyte-associated protein 2-like 132	876	73.8884
TRINITY_DN62603_c0_g1_i3	aquaporin-9-like isoform X1 235	877	73.8815
TRINITY_DN66731_c14_g14_i1	GTP-binding nuclear protein Ran 217	878	73.8807
TRINITY_DN68914_c0_g2_i5	hypothetical protein BOW52_07840, partial 423	879	73.793
TRINITY_DN56743_c3_g1_i1	nuclear receptor coactivator 4-like 618	880	73.5637
TRINITY_DN56876_c0_g1_i3	solute carrier family 40 member 1-like isoform X2 536	881	73.4991
TRINITY_DN39040_c0_g1_i1	DAZ-associated protein 2-like 151	882	73.448
TRINITY_DN65413_c12_g12_i2	SCO-spondin-like isoform X1 655	883	73.4447
TRINITY_DN62954_c0_g2_i1	trichohyalin-like isoform X1	884	73.4109
TRINITY_DN68978_c7_g8_i1	uncharacterized protein LOC111132575 226	885	73.1029
TRINITY_DN55127_c0_g1_i1	AP-1 complex subunit sigma-2 isoform X2 158	886	72.8378
TRINITY_DN7356_c0_g1_i1	---NA---	887	72.7515
TRINITY_DN41632_c0_g1_i2	cardiomyopathy-associated protein 5-like	888	72.6362
TRINITY_DN63231_c0_g3_i2	28S ribosomal protein S34, mitochondrial-like 179	889	72.573
TRINITY_DN119714_c0_g1_i1	tectonic-2 isoform X1 136	890	72.5632
TRINITY_DN67590_c0_g1_i1	hypothetical protein AM593_00240, partial 339	891	72.4521
TRINITY_DN54789_c0_g1_i2	---NA---	892	72.4488
TRINITY_DN113298_c0_g1_i1	---NA---	893	72.4396
TRINITY_DN67470_c0_g5_i1	---NA---	894	72.3567
TRINITY_DN61846_c2_g3_i1	---NA---	895	72.1442
TRINITY_DN67241_c4_g2_i11	Ankyrin repeat and LEM domain-containing protein 1 293	896	72.1246
TRINITY_DN66240_c0_g4_i1	serine/arginine-rich splicing factor 2-like 192	897	72.0953
TRINITY_DN64098_c0_g1_i3	Transaldolase 321	898	71.9069
TRINITY_DN178_c0_g1_i1	Glutathione S-transferase 1 211	899	71.8561
TRINITY_DN64829_c5_g3_i1	---NA---	900	71.7368
TRINITY_DN66938_c5_g11_i1	calpain-B isoform X3 164	901	71.6915
TRINITY_DN68609_c14_g1_i1	PREDICTED: uncharacterized protein C5orf49 homolog 143	902	71.6501
TRINITY_DN33320_c0_g1_i1	---NA---	903	71.5431
TRINITY_DN64648_c0_g1_i1	---NA---	904	71.4785
TRINITY_DN68179_c1_g3_i1	uncharacterized protein LOC110457120 1274	905	71.3058
TRINITY_DN57881_c0_g1_i1	testican-1-like isoform X2 419	906	71.1968
TRINITY_DN67692_c2_g10_i1	hypothetical protein C0Q70_15357 121	907	71.1488
TRINITY_DN4438_c0_g1_i1	cysteine dioxygenase type 1-like 258	908	71.1195
TRINITY_DN68660_c0_g9_i1	---NA---	909	70.972
TRINITY_DN68846_c5_g4_i9	Exodeoxyribonuclease III 961	910	70.8065
TRINITY_DN59404_c0_g1_i1	fructose-1, 6-bisphosphate aldolase 365	911	70.7414
TRINITY_DN64281_c0_g1_i1	macrophage migration inhibitory factor 2 117	912	70.7194
TRINITY_DN44285_c0_g2_i1	BLOC-1-related complex subunit 8-like isoform X2 157	913	70.6484
TRINITY_DN100345_c0_g1_i1	---NA---	914	70.6201
TRINITY_DN68660_c0_g6_i1	multiple epidermal growth factor-like domains protein 10	915	70.5511
TRINITY_DN64499_c0_g2_i1	predicted protein 114	916	70.3699
TRINITY_DN68834_c8_g3_i2	predicted protein 133	917	70.3602
TRINITY_DN66923_c1_g11_i1	---NA---	918	70.3388
TRINITY_DN65597_c0_g3_i1	gelsolin-like protein 2 369	919	70.2715
TRINITY_DN68949_c2_g5_i9	uncharacterized protein LOC106173528 1886	920	70.2187
TRINITY_DN91614_c0_g1_i1	calcineurin subunit A 105	921	70.1933
TRINITY_DN61294_c2_g1_i1	serine/threonine-protein kinase PINK1, mitochondrial-like 714	922	70.19
TRINITY_DN46001_c0_g1_i1	---NA---	923	70.0867
TRINITY_DN67750_c6_g5_i1	acid sphingomyelinase-like phosphodiesterase 3b 433	924	70.0776
TRINITY_DN66027_c0_g1_i8	filamin-B-like isoform X1 661	925	69.9106
TRINITY_DN53952_c0_g1_i1	triosephosphate isomerase-like 252	926	69.9099
TRINITY_DN60460_c0_g2_i1	von Willebrand factor D and EGF domain-containing protein 103	927	69.8897
TRINITY_DN105482_c0_g1_i1	sodium-dependent proline transporter-like 162	928	69.8054
TRINITY_DN67697_c3_g1_i10	---NA---	929	69.7838
TRINITY_DN34288_c0_g2_i1	tumor necrosis factor ligand superfamily member 304	930	69.7566
TRINITY_DN55833_c0_g1_i1	uncharacterized protein LOC110462820 396	931	69.7223
TRINITY_DN116928_c0_g1_i1	---NA---	932	69.6419
TRINITY_DN52656_c0_g2_i1	---NA---	933	69.5557
TRINITY_DN67927_c0_g3_i1	hypothetical protein LOTGIDRAFT_165489	934	69.4529
TRINITY_DN58574_c0_g1_i2	radixin-like isoform X2 566	935	69.3218
TRINITY_DN20440_c0_g1_i1	proteasome subunit beta type-7 272	936	69.1839
TRINITY_DN67220_c0_g2_i1	Ice nucleation protein	937	69.1706
TRINITY_DN103104_c0_g1_i1	Bax inhibitor-1 protein 239	938	69.1347
TRINITY_DN52968_c0_g1_i1	---NA---	939	68.9491
TRINITY_DN55903_c0_g1_i1	B-cell receptor-associated protein 31 244	940	68.9391
TRINITY_DN66646_c1_g3_i2	heat shock protein cognate 5 164	941	68.8718
TRINITY_DN60341_c1_g5_i1	predicted protein	942	68.8645
TRINITY_DN66355_c1_g12_i1	hypothetical protein CRYPA_348 117	943	68.8621
TRINITY_DN68325_c0_g1_i7	---NA---	944	68.8525
TRINITY_DN65415_c0_g1_i3	Fatty-acid amide hydrolase 1 113	945	68.7297
TRINITY_DN60574_c1_g1_i1	ubiquitin carboxyl-terminal hydrolase-like 230	946	68.6132
TRINITY_DN67723_c1_g1_i3	---NA---	947	68.5887
TRINITY_DN59073_c0_g2_i1	proteasome subunit alpha type-7-like 248	948	68.5104
TRINITY_DN47590_c0_g1_i1	conserved Plasmodium protein, unknown function	949	68.4819
TRINITY_DN46860_c0_g2_i1	putative glutathione-specific gamma-glutamylcyclotransferase 2 181	950	68.4178
TRINITY_DN33383_c0_g1_i1	---NA---	951	68.3987
TRINITY_DN66289_c0_g1_i1	eukaryotic translation initiation factor 2A isoform X1 164	952	68.3981
TRINITY_DN59630_c0_g1_i2	phytanoyl-CoA dioxygenase 160	953	68.2098
TRINITY_DN64463_c7_g14_i2	---NA---	954	68.1757
TRINITY_DN67375_c2_g1_i2	---NA---	955	68.0008
TRINITY_DN60217_c1_g2_i2	---NA---	956	67.9454
TRINITY_DN64564_c0_g1_i2	actin-related protein 43526 complex subunit 4 172	957	67.9224
TRINITY_DN68593_c6_g6_i1	Multiple epidermal growth factor-like domains 6	958	67.8729
TRINITY_DN67092_c1_g1_i1	hypothetical protein LOTGIDRAFT_231464 112	959	67.8393
TRINITY_DN68988_c11_g8_i1	receptor-type tyrosine-protein phosphatase kappa-like 503	960	67.8203
TRINITY_DN33999_c0_g1_i1	protein LSM12 homolog 195	961	67.794
TRINITY_DN64193_c0_g3_i1	---NA---	962	67.7657
TRINITY_DN55254_c0_g1_i1	NADH dehydrogenase [ubiquinone] 1 beta subcomplex subunit 2, mitochondrial 133	963	67.6162
TRINITY_DN7089_c0_g1_i1	uncharacterized protein LOC110457086 152	964	67.5579
TRINITY_DN67923_c3_g2_i9	uncharacterized protein LOC110466572 isoform X5 799	965	67.5506
TRINITY_DN67298_c1_g1_i1	hypothetical protein EGW08_013324	966	67.5407
TRINITY_DN63993_c2_g1_i1	cytosolic malate dehydrogenase 335	967	67.4794
TRINITY_DN36092_c1_g2_i1	---NA---	968	67.3077
TRINITY_DN79131_c0_g1_i1	glycogen [starch] synthase-like 109	969	67.2168
TRINITY_DN60817_c0_g1_i3	hematological and neurological expressed 1 -like	970	67.2139
TRINITY_DN66583_c4_g16_i1	---NA---	971	67.1119
TRINITY_DN62244_c0_g2_i2	Activated RNA polymerase II transcriptional coactivator p15 124	972	66.9993
TRINITY_DN66925_c2_g5_i1	hypothetical protein HIM_12195	973	66.9033
TRINITY_DN68159_c2_g1_i1	putative defense protein 218	974	66.884
TRINITY_DN65712_c0_g3_i1	sterol regulatory element-binding protein 1-like 996	975	66.8782
TRINITY_DN68901_c6_g1_i6	---NA---	976	66.806
TRINITY_DN59501_c0_g2_i1	---NA---	977	66.6399
TRINITY_DN44379_c0_g1_i1	Bcl-2 like 2 protein 233	978	66.6019
TRINITY_DN68263_c2_g6_i1	---NA---	979	66.5632
TRINITY_DN58691_c0_g1_i1	cysteine proteases inhibitor 452	980	66.4414
TRINITY_DN66043_c1_g1_i7	tetratricopeptide repeat protein 38 isoform X2 467	981	66.4335
TRINITY_DN64996_c11_g14_i6	receptor-transporting protein 3 338	982	66.4176
TRINITY_DN64134_c0_g2_i1	putative NADH dehydrogenase [ubiquinone] 1 beta subcomplex subunit 10 189	983	66.3844
TRINITY_DN66954_c0_g1_i2	oligosaccharyltransferase complex subunit ostc-B 154	984	66.3522
TRINITY_DN24940_c0_g1_i1	prefoldin subunit 4-like 135	985	66.2875
TRINITY_DN68190_c3_g1_i1	---NA---	986	66.2218
TRINITY_DN67797_c1_g2_i1	zinc finger BED domain-containing protein 1-like 106	987	66.1741
TRINITY_DN64156_c0_g1_i1	coiled-coil domain-containing protein 39-like isoform X1 292	988	66.1478
TRINITY_DN63321_c6_g9_i1	electron transfer flavoprotein subunit beta-like 259	989	66.1302
TRINITY_DN62539_c0_g1_i1	arginine kinase 755	990	66.1081
TRINITY_DN57610_c0_g1_i2	multifunctional methyltransferase subunit TRM112-like protein 125	991	66.0087
TRINITY_DN60120_c0_g1_i1	THO complex subunit 3-like 325	992	65.968
TRINITY_DN66220_c0_g2_i1	28S ribosomal protein S5, mitochondrial-like 424	993	65.8885
TRINITY_DN68277_c2_g3_i1	transmembrane protein ORF57 118	994	65.8828
TRINITY_DN41022_c1_g5_i1	round spermatid basic protein 1-like	995	65.8724
TRINITY_DN57628_c2_g4_i1	sodium-dependent proline transporter-like 206	996	65.7478
TRINITY_DN68727_c2_g1_i1	brevican core protein-like 118	997	65.5669
TRINITY_DN85578_c0_g1_i1	---NA---	998	65.5274
TRINITY_DN68159_c1_g1_i1	---NA---	999	65.5048
TRINITY_DN64869_c0_g1_i1	pyruvate dehydrogenase protein X component-like 495	1000	65.4006
TRINITY_DN21319_c0_g1_i1	uncharacterized protein LOC112573650 148	1001	65.3033
TRINITY_DN68834_c8_g2_i1	---NA---	1002	65.1646
TRINITY_DN60886_c0_g2_i1	39S ribosomal protein L13, mitochondrial-like 202	1003	65.04
TRINITY_DN31789_c0_g2_i1	complement C1q tumor necrosis factor-related protein 1-like 137	1004	65.0195
TRINITY_DN68914_c0_g5_i3	PREDICTED: uncharacterized protein LOC108645345 965	1005	64.9691
TRINITY_DN64531_c0_g2_i1	---NA---	1006	64.9458
TRINITY_DN52625_c0_g1_i1	low-density lipoprotein receptor-related protein 6 570	1007	64.9101
TRINITY_DN68916_c5_g17_i2	CXXC-type zinc finger protein 1-like 109	1008	64.8941
TRINITY_DN66810_c2_g1_i1	P30 adhesin	1009	64.891
TRINITY_DN105816_c0_g2_i1	10 kDa heat shock protein, mitochondrial-like 124	1010	64.8111
TRINITY_DN105751_c1_g1_i1	N-acetylated-alpha-linked acidic dipeptidase 2-like 127	1011	64.7041
TRINITY_DN64941_c0_g2_i1	putative citrate synthase 2 480	1012	64.6972
TRINITY_DN65720_c7_g1_i1	NADH dehydrogenase [ubiquinone] flavoprotein 2, mitochondrial-like 247	1013	64.6245
TRINITY_DN67676_c4_g1_i1	eukaryotic translation initiation factor 1A-like 145	1014	64.6093
TRINITY_DN64844_c1_g1_i1	Universal stress protein A-like protein 169	1015	64.5865
TRINITY_DN118577_c0_g1_i1	F-box/LRR-repeat protein 2 isoform X1 132	1016	64.4099
TRINITY_DN51831_c0_g1_i1	casein kinase II subunit beta 222	1017	64.3364
TRINITY_DN68986_c7_g6_i1	RNA-directed DNA polymerase from transposon BS 564	1018	64.2919
TRINITY_DN39636_c0_g1_i1	---NA---	1019	64.2415
TRINITY_DN53059_c0_g2_i1	---NA---	1020	64.2229
TRINITY_DN67325_c3_g1_i1	exosome complex component CSL4-like isoform X3 220	1021	64.1968
TRINITY_DN48126_c0_g1_i3	---NA---	1022	64.1567
TRINITY_DN47487_c1_g4_i1	---NA---	1023	64.0977
TRINITY_DN67023_c0_g1_i28	unconventional myosin-Ia isoform X3 1112	1024	64.0603
TRINITY_DN61360_c0_g1_i1	transcription factor SOXB1 337	1025	63.9176
TRINITY_DN68093_c1_g1_i1	---NA---	1026	63.8968
TRINITY_DN68119_c5_g2_i9	hypothetical protein LOTGIDRAFT_154963 148	1027	63.7989
TRINITY_DN67089_c1_g1_i1	transcription initiation factor IIA subunit 2-like 107	1028	63.7407
TRINITY_DN50702_c0_g1_i1	profilin	1029	63.7238
TRINITY_DN67666_c4_g2_i4	ganglioside GM2 activator 188	1030	63.6363
TRINITY_DN65368_c1_g3_i1	Heterogeneous nuclear ribonucleoprotein Q 533	1031	63.6265
TRINITY_DN63481_c6_g1_i1	39S ribosomal protein L32, mitochondrial-like 141	1032	63.5904
TRINITY_DN62230_c0_g1_i1	Pleckstrin homology domain-containing family M member 3 251	1033	63.5102
TRINITY_DN60937_c0_g1_i1	eukaryotic translation initiation factor 5-like 462	1034	63.4221
TRINITY_DN68670_c0_g4_i1	serine/threonine-protein kinase pats1 196	1035	63.4003
TRINITY_DN68823_c0_g9_i1	---NA---	1036	63.3768
TRINITY_DN61781_c0_g2_i1	---NA---	1037	63.3683
TRINITY_DN43864_c0_g1_i1	---NA---	1038	63.2067
TRINITY_DN59739_c0_g1_i1	NADH-ubiquinone oxidoreductase 49 kDa subunit-like 473	1039	63.1891
TRINITY_DN22769_c0_g1_i1	prisilkin-39-like isoform X1	1040	63.0686
TRINITY_DN68134_c0_g8_i2	---NA---	1041	63.0503
TRINITY_DN64997_c0_g4_i7	serine/arginine-rich splicing factor 6-like isoform X2 284	1042	63.0327
TRINITY_DN62550_c0_g1_i1	protein BCCIP homolog 293	1043	62.9866
TRINITY_DN67940_c18_g7_i2	selenium-dependent glutathione peroxidase 143	1044	62.9243
TRINITY_DN60796_c0_g2_i1	LOC446940 protein	1045	62.8367
TRINITY_DN66350_c2_g19_i3	J domain-containing protein DDB_G0295729-like isoform X2 232	1046	62.8355
TRINITY_DN56140_c0_g1_i1	leukotriene A-4 hydrolase-like 159	1047	62.8331
TRINITY_DN118759_c0_g1_i1	---NA---	1048	62.7204
TRINITY_DN68562_c0_g11_i4	---NA---	1049	62.6528
TRINITY_DN60282_c2_g2_i1	hypothetical protein EGW08_005379 109	1050	62.6205
TRINITY_DN56854_c0_g2_i1	---NA---	1051	62.5468
TRINITY_DN55518_c0_g2_i1	lambda-crystallin-like protein 241	1052	62.4952
TRINITY_DN63679_c6_g10_i2	monocarboxylate transporter 4-like 525	1053	62.4031
TRINITY_DN58564_c1_g3_i1	ATP-dependent RNA helicase HrpA	1054	62.3888
TRINITY_DN42046_c0_g1_i1	sarcoplasmic reticulum histidine-rich calcium-binding protein-like 145	1055	62.3873
TRINITY_DN46327_c0_g1_i1	rho-related BTB domain-containing protein 3	1056	62.321
TRINITY_DN18542_c0_g1_i1	ubiquitin-conjugating enzyme E2 G2 166	1057	62.3196
TRINITY_DN118924_c0_g1_i1	dopamine N-acetyltransferase-like isoform X1 249	1058	62.202
TRINITY_DN65663_c9_g1_i1	---NA---	1059	62.075
TRINITY_DN63307_c0_g2_i2	---NA---	1060	61.906
TRINITY_DN67428_c5_g6_i1	---NA---	1061	61.8327
TRINITY_DN67320_c2_g1_i4	CUB and sushi domain-containing protein 3-like 325	1062	61.8197
TRINITY_DN55360_c0_g1_i3	predicted protein	1063	61.5238
TRINITY_DN57836_c0_g1_i1	---NA---	1064	61.5208
TRINITY_DN64659_c0_g1_i5	microsomal glutathione S-transferase 151	1065	61.511
TRINITY_DN61293_c0_g1_i2	prosaposin isoform X8 280	1066	61.507
TRINITY_DN63377_c1_g1_i2	uncharacterized protein LOC112564180	1067	61.4992
TRINITY_DN64382_c0_g2_i1	band 7 protein AGAP004871-like isoform X5 311	1068	61.3738
TRINITY_DN48889_c0_g1_i1	enoyl-CoA hydratase, mitochondrial-like 300	1069	61.3237
TRINITY_DN58834_c0_g4_i1	conserved hypothetical protein	1070	61.135
TRINITY_DN67682_c3_g3_i1	---NA---	1071	61.0313
TRINITY_DN68619_c2_g3_i4	reelin isoform X1 502	1072	61.0094
TRINITY_DN57727_c0_g1_i1	putative amine oxidase [copper-containing] 807	1073	60.9656
TRINITY_DN66369_c6_g1_i2	amyloid precursor protein 586	1074	60.9331
TRINITY_DN63599_c0_g1_i2	predicted protein	1075	60.9046
TRINITY_DN49727_c0_g1_i1	proteasome subunit beta type-5-like 277	1076	60.9032
TRINITY_DN68670_c0_g8_i1	Mediator of RNA polymerase II transcription subunit 25 112	1077	60.8947
TRINITY_DN27993_c0_g1_i2	dnaJ homolog subfamily A member 1-like 400	1078	60.8803
TRINITY_DN67547_c2_g4_i1	inhibitor of nuclear factor-kappaB 394	1079	60.8036
TRINITY_DN59328_c0_g1_i2	uncharacterized protein LOC112572063 isoform X1 650	1080	60.787
TRINITY_DN65299_c0_g1_i3	SPARC protein 264	1081	60.7535
TRINITY_DN39484_c0_g1_i1	---NA---	1082	60.6458
TRINITY_DN50084_c0_g1_i1	copper oxidase	1083	60.5892
TRINITY_DN116985_c0_g1_i1	---NA---	1084	60.5643
TRINITY_DN68385_c0_g12_i1	---NA---	1085	60.5549
TRINITY_DN67686_c0_g1_i1	beta-galactosidase-like 146	1086	60.5481
TRINITY_DN68249_c1_g9_i7	uncharacterized protein LOC105920141 376	1087	60.5298
TRINITY_DN66109_c0_g3_i8	Spectrin alpha chain 1183	1088	60.5129
TRINITY_DN47044_c1_g1_i1	cytochrome b5 132	1089	60.4906
TRINITY_DN59760_c0_g2_i2	---NA---	1090	60.3602
TRINITY_DN1433_c0_g1_i1	enoyl-CoA delta isomerase 3-like 99	1091	60.3416
TRINITY_DN63322_c0_g1_i2	aspartate aminotransferase, mitochondrial-like 431	1092	60.2509
TRINITY_DN17250_c0_g1_i1	uncharacterized protein LOC111103638	1093	60.1378
TRINITY_DN58396_c0_g1_i1	cathepsin L 347	1094	60.1356
TRINITY_DN63149_c0_g1_i2	---NA---	1095	60.0596
TRINITY_DN68960_c2_g1_i1	helicase with zinc finger domain 2-like isoform X1 277	1096	60.0455
TRINITY_DN57427_c0_g1_i1	LIM domain-containing protein WLIM2b 118	1097	60.0305
TRINITY_DN63729_c0_g5_i1	ragulator complex protein LAMTOR4-like 107	1098	59.9762
TRINITY_DN39095_c0_g2_i1	syntenin-1-like 302	1099	59.8728
TRINITY_DN61141_c0_g6_i2	Fibrinolytic enzyme, isozyme C 231	1100	59.7725
TRINITY_DN50565_c1_g1_i1	tubulin beta chain isoform X2 188	1101	59.7685
TRINITY_DN65723_c0_g1_i1	proteosome PSMB6/9 240	1102	59.7492
TRINITY_DN24156_c0_g1_i1	TNFAIP3-interacting protein 1 609	1103	59.7482
TRINITY_DN29525_c0_g1_i1	bolA-like protein DDB_G0274169 143	1104	59.6813
TRINITY_DN67766_c0_g1_i1	uncharacterized protein LOC106162557 237	1105	59.6639
TRINITY_DN65377_c1_g2_i1	CIC11C00000005699 [ 193	1106	59.4609
TRINITY_DN64361_c1_g1_i3	calcyclin-binding protein-like 222	1107	59.4471
TRINITY_DN46894_c0_g1_i2	probable calcium-binding protein CML34 152	1108	59.3064
TRINITY_DN56330_c0_g2_i1	stromal cell-derived factor 2-like 195	1109	59.2803
TRINITY_DN65786_c8_g15_i1	serine/threonine-protein kinase TBK1-like isoform X1 171	1110	59.1786
TRINITY_DN67746_c1_g3_i5	sporulation-specific protein 15-like 990	1111	59.0501
TRINITY_DN68001_c4_g7_i2	hypothetical protein DAPPUDRAFT_112453 124	1112	58.8793
TRINITY_DN62987_c0_g1_i1	Sodium/hydrogen exchanger 2 119	1113	58.8638
TRINITY_DN99462_c0_g1_i1	WD40 repeat-containing protein SMU1-like isoform X2 104	1114	58.7985
TRINITY_DN68688_c1_g2_i11	Chitin synthase 1 1010	1115	58.7637
TRINITY_DN50268_c0_g2_i4	predicted protein	1116	58.726
TRINITY_DN104965_c0_g1_i1	probable nuclear hormone receptor HR3 237	1117	58.6355
TRINITY_DN68999_c8_g3_i2	uncharacterized protein F54H12	1118	58.6082
TRINITY_DN63682_c0_g1_i3	eukaryotic translation initiation factor 3 subunit L-like 550	1119	58.5312
TRINITY_DN62727_c1_g1_i4	nuclear migration protein nudC-like 336	1120	58.5261
TRINITY_DN65637_c1_g1_i1	YTH domain family protein 2 520	1121	58.4474
TRINITY_DN60780_c0_g1_i2	---NA---	1122	58.3914
TRINITY_DN64304_c0_g2_i1	pol-like protein 185	1123	58.3434
TRINITY_DN68055_c0_g1_i1	hsc70-interacting protein 438	1124	58.1757
TRINITY_DN33814_c0_g1_i1	uncharacterized protein LOC112555040 303	1125	58.1659
TRINITY_DN1455_c0_g2_i1	---NA---	1126	58.1548
TRINITY_DN49125_c0_g1_i2	proteasome subunit alpha type-3-like 256	1127	58.1233
TRINITY_DN55140_c0_g4_i1	---NA---	1128	58.1061
TRINITY_DN59426_c0_g1_i1	predicted protein	1129	58.1013
TRINITY_DN67424_c4_g2_i5	rRNA 2'-O-methyltransferase fibrillarin-like isoform X2 268	1130	58.0758
TRINITY_DN61703_c0_g1_i2	N-sulphoglucosamine sulphohydrolase-like 203	1131	58.0705
TRINITY_DN43629_c0_g1_i1	---NA---	1132	57.92
TRINITY_DN52418_c0_g1_i1	D-3-phosphoglycerate dehydrogenase-like 551	1133	57.8624
TRINITY_DN68896_c4_g9_i2	RNA-directed DNA polymerase from mobile element jockey 107	1134	57.8026
TRINITY_DN55242_c0_g1_i2	E3 ubiquitin-protein ligase rnf146-like 416	1135	57.7509
TRINITY_DN11108_c0_g3_i1	---NA---	1136	57.7481
TRINITY_DN63071_c5_g1_i1	G-protein coupled receptor moody-like 334	1137	57.7396
TRINITY_DN65963_c0_g1_i1	---NA---	1138	57.6454
TRINITY_DN65178_c7_g4_i1	Protein flp 379	1139	57.3994
TRINITY_DN65631_c0_g1_i2	alpha-actinin, sarcomeric isoform X2 891	1140	57.3123
TRINITY_DN63321_c6_g10_i4	protein quaking-B isoform X5 324	1141	57.2609
TRINITY_DN51520_c1_g1_i2	Ice nucleation protein	1142	57.2288
TRINITY_DN61292_c1_g1_i4	bifunctional purine biosynthesis protein PURH-like 594	1143	57.2215
TRINITY_DN109095_c0_g1_i1	uncharacterized protein LOC111119200 151	1144	57.2
TRINITY_DN68501_c1_g1_i3	beta-1,3-galactosyltransferase 1-like 494	1145	57.0776
TRINITY_DN64550_c0_g1_i2	---NA---	1146	57.0527
TRINITY_DN68978_c7_g4_i1	tripartite motif-containing protein 45-like	1147	56.897
TRINITY_DN65590_c2_g3_i2	---NA---	1148	56.8591
TRINITY_DN68650_c2_g10_i1	uncharacterized protein LOC111119416 isoform X1 117	1149	56.7987
TRINITY_DN68651_c2_g13_i4	PREDICTED: uncharacterized protein LOC105329685 167	1150	56.793
TRINITY_DN68738_c2_g1_i3	serine/threonine-protein kinase/endoribonuclease IRE1-like protein 405	1151	56.7799
TRINITY_DN55852_c0_g1_i3	arylsulfatase B-like 493	1152	56.7798
TRINITY_DN66776_c0_g2_i1	78 kDa glucose-regulated protein 667	1153	56.7732
TRINITY_DN65832_c0_g1_i2	KH domain-containing, RNA-binding, signal transduction-associated protein 2 476	1154	56.5801
TRINITY_DN63915_c0_g1_i1	---NA---	1155	56.3917
TRINITY_DN68895_c2_g7_i1	MAM and LDL-receptor class A domain-containing protein 1-like 111	1156	56.3912
TRINITY_DN57084_c0_g2_i1	RWD domain-containing protein 4-like 189	1157	56.3785
TRINITY_DN65678_c0_g2_i1	---NA---	1158	56.3037
TRINITY_DN62179_c0_g2_i1	---NA---	1159	56.2729
TRINITY_DN68587_c1_g4_i2	skeletal muscle actin 5 150	1160	56.2242
TRINITY_DN67726_c0_g3_i1	salivary glue protein Sgs-3-like	1161	56.1676
TRINITY_DN56943_c0_g1_i1	cytochrome P450 1A1-like isoform X1 325	1162	56.055
TRINITY_DN67522_c1_g6_i11	talin-1-like isoform X21 1140	1163	55.9942
TRINITY_DN16802_c0_g1_i1	UPF0691 protein C9orf116 homolog 105	1164	55.9515
TRINITY_DN65969_c6_g3_i2	hypothetical protein OCBIM_22026308mg	1165	55.9065
TRINITY_DN66394_c0_g1_i1	transitional endoplasmic reticulum ATPase isoform X2 801	1166	55.8384
TRINITY_DN68725_c0_g12_i1	---NA---	1167	55.683
TRINITY_DN30388_c0_g1_i1	---NA---	1168	55.6643
TRINITY_DN63875_c0_g1_i1	probable serine incorporator isoform X5 461	1169	55.6598
TRINITY_DN15232_c0_g1_i1	protein draper-like	1170	55.4594
TRINITY_DN50433_c0_g1_i1	integrator complex subunit 9-like isoform X1 655	1171	55.4475
TRINITY_DN67298_c1_g4_i5	protein rtoA-like	1172	55.344
TRINITY_DN77709_c0_g1_i1	Phosphoenolpyruvate carboxykinase [GTP] 650	1173	55.325
TRINITY_DN53814_c0_g1_i3	ATP-binding cassette sub-family D member 4-like isoform X2 623	1174	55.3055
TRINITY_DN68333_c2_g4_i1	DNA-directed RNA polymerases I, II, and III subunit RPABC3-like 114	1175	55.1211
TRINITY_DN35328_c0_g1_i2	6-phosphogluconolactonase-like 241	1176	55.0991
TRINITY_DN67476_c2_g4_i3	putative RNA-directed DNA polymerase from transposon BS	1177	55.0963
TRINITY_DN65687_c4_g9_i3	G protein B subunit 344	1178	55.0408
TRINITY_DN51062_c0_g2_i2	death ligand signal enhancer-like 564	1179	55.0319
TRINITY_DN34313_c0_g2_i1	---NA---	1180	55.0305
TRINITY_DN57254_c0_g1_i1	ATP-binding cassette sub-family F member 2-like isoform X2 622	1181	55.0278
TRINITY_DN47027_c0_g1_i1	transcriptional activator protein Pur-beta-B isoform X6 249	1182	54.9926
TRINITY_DN66848_c6_g1_i3	---NA---	1183	54.7955
[truncated: 1,357 more rows]

## Sheet: Table S8
Table S8. The top 10% of the highest expressed genes in the gill of Archivesica marissinica host. Gene expression levels are expressed as the value of transcripts per million (TPM).
[truncated: 2,554 more rows]
